# Supplementary material for: Identification of consistent QTL for time to maturation in Virginia-type Peanut (Arachis hypogaea L.)
Source: BMC Plant Biol. 2021 Apr 19;21:186. doi: 10.1186/s12870-021-02951-5 (PMC8054412; doi:10.1186/s12870-021-02951-5)
Supplement: Supplementary file 2 — Additional file 2: Table S1. Population genotype data presented by the order of linkage map. Physical positions of markers were based on the tetraploid peanut genome sequence [17]. Table S2. Mean phenotypic values of measured traits over two years of field tests. [file 12870_2021_2951_MOESM2_ESM.xlsx]

## Sheet: Table S1
Identification of Stable QTL for Time to Maturation in Virginia-Type Peanut (Arachis hypogaea L.)
Srinivas Kunta1,2, Sara Agmon1, Ilan Hedvat1, Yael Levy1, Ye Chu3, Peggy Ozias-Akins3 & Ran Hovav1*
1 Department of Field Crops, Institute of Plant Sciences, Agriculture research organization-The Volcani Center, HaMakkabbim Road, P. O. Box 15159, 7505101 Rishon LeZiyyon, Israel. 2 Faculty of Agricultural, Food and the Environmental Quality Sciences, the Hebrew Univ. of Jerusalem, POB 12, Rehovot 76100, Israel. 3 Department of Horticulture and Institute of Plant Breeding, Genetics and Genomics, …
Population genotyping following the linkage map order colored based on the alleles of the parents. Physical position included based on the tetraploid peanut sequence [17].
HH - 'Hanoch' x 'Harari' RILs
Linkage group	Marker	Alias	Genetic distance (cM)	Pseudomolecule	Physical position (bp)		HH-1	HH-2	HH-3	HH-4	HH-5	HH-6	HH-7	HH-8	HH-9	HH-10	HH-11	HH-12	HH-13	HH-14	HH-15	HH-16	HH-17	HH-19	HH-20	HH-21	HH-22	HH-23	HH-24	HH-25	HH-26	HH-27	HH-29	HH-31	HH-32	HH-34	HH-35	HH-36	HH-39	HH-40	HH-41	HH-42	HH-43	HH-44	HH-45	HH-47	HH-48	HH-49	HH-51
A01	AX-176810592	AX-176810592_A01	0	Arahy.01	6512389		a	a	a	a	a	a	b	b	b	b	b	a	h	b	b	h	b	-	a	a	a	-	a	b	a	a	a	a	b	a	a	h	h	b	a	a	b	b	b	b	a	h	b
A01	AX-176810853	AX-176810853_A01	4.432	Arahy.01	7302655		a	b	a	a	a	a	b	b	b	-	b	a	h	b	b	h	b	a	a	b	a	b	b	b	a	a	a	a	b	a	a	a	-	b	a	a	a	b	b	b	a	b	b
A01	AX-176796860	AX-176796860_A01	19.624	Arahy.01	20436796		a	b	a	a	b	a	a	b	b	a	a	a	h	h	h	b	b	a	a	b	b	b	b	b	b	a	a	a	b	a	a	a	h	b	a	a	a	b	a	b	h	a	a
A01	AX-176815544	AX-176815544_A01	20.397	Arahy.01	22600140		a	b	a	a	b	a	a	b	b	a	a	a	h	h	h	b	b	a	a	b	b	b	b	b	b	a	a	a	b	a	a	a	h	b	a	a	a	b	a	b	h	a	a
A01	AX-176822213	AX-176822213_A01	20.397	Arahy.01	28672139		a	b	a	a	b	a	a	b	b	a	a	a	h	h	h	b	b	a	a	b	b	b	b	b	b	a	a	a	b	a	a	a	h	b	a	a	a	b	a	b	h	a	a
A01	AX-176822757	AX-176822757_A01	21.057	Arahy.01	36494670		a	b	a	a	b	a	a	b	b	a	a	a	h	h	h	b	b	a	a	b	b	b	b	b	b	a	a	a	b	a	a	a	h	b	a	a	a	b	a	b	h	a	a
A01	AX-176821461	AX-176821461_A01	25.037	Arahy.01	95500083		a	b	a	a	b	a	a	b	b	h	a	a	h	h	h	b	b	a	a	b	b	b	b	b	b	a	a	h	b	a	a	a	h	b	a	a	a	b	a	b	h	a	a
A01	AX-147239258	AX-147239258_B01	39.034	Arahy.01	140988593		a	a	a	a	b	a	a	b	a	h	a	a	h	h	h	h	b	a	h	b	a	b	b	b	b	h	b	h	a	a	a	a	a	b	a	a	a	b	a	b	a	a	b
A01	AX-176800388	AX-176800388_A01	39.473	Arahy.01	102137076		a	a	a	a	b	a	a	b	a	h	a	a	h	h	h	h	b	a	h	b	a	b	b	b	b	h	b	b	a	a	a	a	a	b	a	a	a	b	a	b	a	a	b
A01	AX-176794855	AX-176794855_A01	39.473	Arahy.01	102180612		a	a	a	a	b	a	a	b	a	h	a	a	h	h	h	h	b	a	h	b	a	b	b	b	b	h	b	b	a	a	a	a	a	b	a	a	a	b	a	b	a	a	b
A01	AX-147211855	AX-147211855_A01	39.473	Arahy.01	102199118		a	a	a	a	b	a	a	b	a	h	a	a	h	h	h	h	b	a	h	b	a	b	b	b	b	h	b	b	a	a	-	a	a	b	a	a	a	b	a	b	a	a	b
A01	AX-176819614	AX-176819614_A01	39.499	Arahy.01	102137006		a	a	a	a	b	a	a	b	a	h	a	a	h	h	h	h	b	a	h	b	a	b	b	b	b	h	b	b	a	a	a	a	a	b	a	a	a	b	a	b	a	a	b
A01	AX-176819572	AX-176819572_A01	39.595	Arahy.01	102180542		a	a	a	a	b	a	a	b	a	h	a	a	h	h	h	h	b	a	h	b	a	b	b	b	b	h	b	b	a	a	a	a	a	b	a	a	a	b	a	b	a	a	b
A01	AX-176820916	AX-176820916_A01	40.092	Arahy.01	102774412		a	a	a	a	b	a	a	b	a	b	a	h	h	h	h	h	b	-	h	b	a	b	b	b	-	h	b	b	a	a	a	a	a	b	a	a	a	b	a	-	a	a	b
A01	AX-176801996	AX-176801996_A01	40.349	Arahy.01	102794544		a	a	a	a	b	a	a	b	a	b	a	a	h	h	h	h	b	a	h	b	a	b	b	b	b	h	b	b	a	a	a	a	a	b	a	a	a	b	a	b	a	a	b
A01	AX-176793038	AX-176793038_A01	40.349	Arahy.01	102730483		a	a	a	a	b	a	a	b	a	b	a	a	h	h	h	h	b	a	h	b	a	b	b	b	b	h	b	b	a	a	a	a	a	b	a	a	a	b	a	b	a	a	b
A01	AX-176810594	AX-176810594_A01	40.612	Arahy.01	102630479		a	a	a	a	b	a	-	b	a	b	a	a	h	h	h	h	b	a	h	b	a	b	b	b	b	h	b	b	a	a	h	a	a	b	a	a	a	b	a	b	a	a	b
A01	AX-176819529	AX-176819529_A01	40.98	Arahy.01	102401896		a	a	a	a	b	a	a	b	a	b	a	a	h	h	h	h	b	a	h	b	a	b	b	b	b	h	b	b	a	a	-	a	a	b	a	a	a	b	a	b	a	a	b
A01	AX-176798927	AX-176798927_A01	41.093	Arahy.01	102461174		a	a	a	a	b	a	a	b	a	b	a	a	h	h	h	h	b	a	h	b	a	b	b	b	b	h	b	b	a	a	a	a	a	b	a	a	a	b	a	b	a	a	b
A01	AX-176797261	AX-176797261_A01	41.114	Arahy.01	102401826		a	a	a	a	b	a	a	b	a	b	a	a	h	h	h	h	b	a	h	b	a	b	b	b	b	h	b	b	a	a	a	a	a	b	a	a	a	b	a	b	a	a	b
A01	AX-176808268	AX-176808268_A01	41.332	Arahy.01	102341244		a	a	a	a	b	a	a	b	a	b	a	a	h	h	h	h	b	a	h	b	a	b	b	b	b	h	b	b	a	a	a	a	a	b	a	a	a	b	a	b	a	a	b
A01	AX-176794304	AX-176794304_A01	41.549	Arahy.01	102216880		a	a	a	a	b	a	a	b	a	b	a	a	h	h	h	h	b	a	h	b	a	b	b	b	b	h	b	b	a	a	a	a	a	b	a	a	a	b	a	b	a	a	b
A01	AX-176823977	AX-176823977_A01	41.657	Arahy.01	102449811		a	a	a	a	b	a	a	b	a	b	a	a	h	h	h	h	b	a	h	b	a	b	b	b	b	h	b	b	a	a	a	a	a	b	a	a	a	b	a	b	a	a	b
A01	AX-176816203	AX-176816203_A01	41.766	Arahy.01	102456906		a	a	a	a	b	a	a	b	a	b	a	a	h	h	h	h	b	a	h	b	a	b	b	b	b	h	b	b	a	a	a	a	a	b	a	a	a	b	a	b	a	a	b
A01	AX-176802338	AX-176802338_A01	41.874	Arahy.01	102539382		a	a	a	a	b	a	a	b	a	b	-	a	h	h	-	h	b	a	b	b	-	b	b	b	b	h	b	b	a	a	a	a	a	b	a	a	a	b	a	b	a	a	b
A01	AX-176802424	AX-176802424_A01	42.648	Arahy.01	102859008		a	a	a	a	-	a	a	b	a	b	a	-	h	h	h	h	-	a	b	-	a	b	b	b	b	h	b	-	a	a	a	a	a	-	a	a	a	b	a	b	a	a	b
A01	AX-176813242	AX-176813242_A01	43.313	Arahy.01	102866098		a	a	a	a	b	a	a	b	a	b	a	a	h	h	h	h	b	a	b	b	a	b	b	b	b	h	b	b	a	a	a	a	a	b	a	a	a	b	a	b	a	a	b
A02	AX-147215251	AX-147215251_B02	0	Arahy.02	119838186		a	b	a	a	b	a	a	b	a	b	h	a	a	a	b	a	b	a	b	a	a	a	b	b	b	b	b	a	b	b	b	b	b	b	a	b	b	b	b	a	b	a	a
A02	AX-176817979	AX-176817979_B02	8.276	Arahy.02	118433313		a	b	a	a	a	h	a	a	a	b	h	a	a	a	b	a	b	a	a	a	a	a	b	h	a	b	b	a	a	b	b	b	b	b	a	b	b	b	b	a	b	a	a
A02	AX-147242791	AX-147242791_B02	10.314	Arahy.02	117892427		a	h	a	a	a	h	a	a	a	b	h	a	a	a	b	a	b	a	a	a	a	a	b	h	b	b	b	a	a	b	b	a	b	b	a	b	b	b	b	a	b	a	a
A02	AX-176811283	AX-176811283_A02	15.321	Arahy.02	100155537		a	h	a	a	a	a	a	a	a	b	-	a	a	-	b	a	h	a	a	a	a	a	-	h	b	-	a	a	a	b	b	a	b	b	a	b	b	b	b	a	b	a	a
A02	AX-176797145	AX-176797145_A02	19.154	Arahy.02	99583644		a	b	a	a	a	a	a	a	b	b	b	a	b	h	b	a	b	a	a	a	a	a	b	h	b	b	a	a	b	b	b	a	b	b	a	b	b	a	b	b	b	a	a
A02	AX-176811465	AX-176811465_A02	21.084	Arahy.02	99415721		a	h	a	a	a	a	a	a	b	b	b	a	b	a	b	a	b	a	a	a	a	a	b	-	b	b	a	a	b	b	b	a	b	b	a	b	b	a	b	b	b	a	a
A02	AX-176824044	AX-176824044_A02	22.755	Arahy.02	99326701		a	b	a	a	a	a	a	a	b	b	b	a	b	h	b	a	b	a	a	a	a	a	b	h	b	b	a	a	b	b	b	a	b	b	a	b	b	a	b	b	b	a	a
A02	AX-147215091	AX-147215091_A02	22.974	Arahy.02	99261264		a	b	a	a	a	a	a	a	b	b	b	a	b	h	b	a	b	a	a	a	a	a	b	h	b	b	a	a	b	b	b	a	b	b	a	b	b	a	b	b	b	a	a
A02	AX-147242584	AX-147242584_B02	25.399	Arahy.02	115599268		a	b	a	a	a	a	a	a	b	b	b	a	b	a	b	a	b	a	a	a	a	a	b	a	b	b	a	a	b	b	b	a	b	b	a	b	b	a	b	b	b	a	a
A02	AX-147242555	AX-147242555_A02	28.073	Arahy.02	98804729		a	h	b	a	a	a	a	a	b	b	b	a	b	h	h	a	b	a	a	a	a	a	b	h	b	b	a	a	b	b	b	a	b	b	a	b	b	a	b	b	b	a	a
A02	AX-147242541	AX-147242541_A02	29.388	Arahy.02	98585327		a	b	b	a	a	a	a	a	b	b	b	a	b	-	-	-	b	a	a	a	a	a	b	a	b	b	a	a	b	b	b	a	b	b	a	b	b	a	b	b	b	a	a
A02	AX-147242533	AX-147242533_A02	31.35	Arahy.02	98390921		a	h	b	a	a	a	a	a	b	b	b	a	b	h	h	a	b	a	a	a	a	a	b	h	b	b	a	a	b	b	b	a	b	a	a	b	b	a	b	b	b	a	a
A02	AX-176811280	AX-176811280_A02	33.456	Arahy.02	98152887		a	b	b	a	a	a	a	a	b	b	b	a	b	b	h	a	b	a	a	a	a	a	b	-	b	b	a	a	b	b	b	h	b	a	a	b	b	a	b	b	b	h	a
A02	AX-147214887	AX-147214887_B02	49.342	Arahy.02	111193172		h	h	b	a	a	a	a	a	b	b	b	a	b	b	b	a	b	a	a	a	b	a	b	h	b	b	a	a	b	b	b	a	b	a	a	h	b	a	a	b	b	b	a
A02	AX-176793031	AX-176793031_B02	51.128	Arahy.02	111010060		h	b	b	a	a	a	a	a	b	b	b	-	b	b	b	a	b	a	a	a	b	a	b	h	b	b	a	a	b	b	b	-	b	a	a	a	b	a	a	b	b	b	a
A02	AX-176803840	AX-176803840_B02	51.966	Arahy.02	111009960		h	b	b	a	a	a	a	a	b	b	b	a	b	b	b	a	b	a	a	a	b	a	b	h	b	b	a	a	b	b	b	a	b	a	a	h	b	a	a	b	b	b	a
A02	AX-176813902	AX-176813902_A02	52.496	Arahy.02	95075013		h	b	b	a	a	a	a	a	b	b	b	a	b	b	b	a	b	a	a	a	b	a	b	h	b	b	a	a	b	b	b	a	b	a	a	h	b	a	a	b	b	b	a
A02	AX-176794570	AX-176794570_A02	52.496	Arahy.02	95131917		h	b	b	a	a	a	a	a	b	b	b	a	b	b	b	a	b	a	a	a	b	a	b	h	b	b	a	a	b	b	b	a	b	a	a	h	b	a	a	b	b	b	a
A02	AX-176820263	AX-176820263_A02	52.648	Arahy.02	94987301		h	b	b	a	a	a	a	a	b	b	b	a	b	b	b	a	b	a	a	a	b	a	b	-	-	b	a	a	b	b	b	a	b	a	a	h	b	a	a	b	b	b	a
A02	AX-176816743	AX-176816743_A02	54.065	Arahy.02	94490940		h	b	b	a	a	a	a	a	b	b	b	a	b	b	b	a	b	a	a	a	b	a	b	h	b	b	a	a	b	b	b	a	b	a	a	h	b	b	a	b	b	b	a
A02	AX-176796970	AX-176796970_B02	54.283	Arahy.02	109833673		h	h	b	a	a	a	a	a	b	b	b	a	b	b	b	a	b	a	a	a	b	a	b	h	b	b	a	a	b	b	b	a	b	a	a	h	b	b	a	b	b	b	a
A02	AX-176801533	AX-176801533_A02	54.944	Arahy.02	94457536		h	b	b	a	a	a	a	a	b	b	b	a	b	b	b	a	b	a	a	a	b	a	b	h	b	b	a	a	b	b	b	a	b	a	a	h	b	b	a	b	b	b	a
A02	AX-176814206	AX-176814206_A02	55.717	Arahy.02	94142604		h	b	b	a	a	a	a	a	b	b	b	a	b	b	a	a	b	a	a	a	b	a	b	b	b	b	a	a	b	b	b	a	b	a	a	h	b	b	a	b	b	b	a
A02	AX-176798679	AX-176798679_A02	55.973	Arahy.02	93771088		a	b	b	a	a	a	a	a	-	b	b	a	b	b	a	a	b	a	a	a	b	a	b	b	-	b	a	a	b	b	-	a	b	a	a	h	b	b	a	b	b	b	a
A02	AX-176798388	AX-176798388_A02	56.53	Arahy.02	94167607		-	h	b	a	a	a	a	a	b	b	b	a	b	b	a	a	-	a	a	a	b	a	b	b	b	b	a	a	b	b	b	a	b	a	a	h	b	b	a	b	b	b	a
A02	AX-176813093	AX-176813093_A02	57.485	Arahy.02	93495384		a	h	b	a	a	a	a	a	b	b	b	a	b	b	a	a	b	a	a	a	b	a	b	b	b	b	a	a	b	b	b	a	b	a	a	h	b	b	a	b	b	b	b
A02	AX-176809183	AX-176809183_A02	58.371	Arahy.02	93214410		a	b	b	a	a	a	a	a	b	b	b	a	b	b	a	a	b	a	h	a	b	a	b	b	b	b	a	a	b	b	b	a	b	a	a	h	b	b	a	b	b	b	b
A02	AX-176807023	AX-176807023_A02	68.047	Arahy.02	62553164		b	h	b	a	a	a	a	a	b	b	b	a	b	b	a	a	b	a	a	a	b	a	b	b	b	b	b	a	b	b	b	a	b	a	a	a	b	b	a	b	b	b	b
A02	AX-176811408	AX-176811408_A02	68.61	Arahy.02	46211914		b	b	b	a	a	a	a	a	b	b	b	a	b	b	a	a	b	a	a	a	b	a	b	b	b	b	b	a	b	b	b	a	b	a	a	a	b	b	a	b	b	b	b
A02	AX-176812850	AX-176812850_A02	68.61	Arahy.02	30503231		b	b	b	a	a	a	a	a	b	b	b	a	b	b	a	a	b	a	a	a	b	a	b	b	b	b	b	a	b	b	b	a	b	a	a	a	b	b	a	b	b	b	b
A02	AX-147241086	AX-147241086_B02	69.27	Arahy.02	23157994		b	-	b	a	a	a	a	a	b	b	b	a	b	b	a	a	b	a	a	-	b	a	b	b	b	b	b	a	b	b	b	a	b	a	a	a	b	b	a	b	b	b	b
A02	AX-176797184	AX-176797184_A02	70.516	Arahy.02	18547845		b	b	b	a	a	a	a	a	b	b	b	a	b	b	a	a	b	a	a	a	b	a	b	b	b	b	b	b	b	b	b	a	b	a	a	a	b	b	a	b	b	b	b
A02	AX-147212864	AX-147212864_A02	91.24	Arahy.02	4166067		b	h	b	b	a	a	b	a	b	b	b	a	b	b	a	a	b	a	b	a	b	a	b	b	a	b	h	b	a	a	b	b	a	b	b	a	a	b	a	b	b	a	b
A02	AX-176809156	AX-176809156_A02	91.567	Arahy.02	4697114		b	a	b	b	a	a	b	a	b	b	b	a	b	b	a	a	b	a	b	a	b	a	b	b	a	b	h	b	a	a	b	b	a	b	b	a	a	b	a	b	b	a	b
A02	AX-176805545	AX-176805545_A02	91.676	Arahy.02	4135940		b	a	b	b	a	a	b	a	b	b	b	a	b	b	a	a	b	a	b	a	b	a	b	b	a	b	h	b	a	a	b	b	a	b	b	a	a	b	a	b	b	a	b
A03_1	AX-176806987	AX-176806987_A03	0	Arahy.03	4001048		a	b	a	b	b	a	b	a	b	b	a	-	a	b	a	b	b	b	a	h	h	h	b	b	b	b	b	b	a	b	a	a	a	a	b	a	a	b	h	a	b	a	a
A03_1	AX-176796094	AX-176796094_A03	0.871	Arahy.03	4026612		a	b	h	b	b	a	b	a	b	b	a	b	a	b	a	b	b	b	a	h	h	h	b	b	b	b	b	b	a	b	a	a	a	a	b	a	a	b	b	a	b	a	a
A03_1	AX-176802042	AX-176802042_A03	1.122	Arahy.03	4121703		a	b	-	b	b	a	b	a	b	b	a	b	a	b	a	b	b	b	a	h	h	h	b	b	b	b	b	b	a	b	a	a	a	a	b	a	a	b	b	a	b	a	a
A03_1	AX-176808986	AX-176808986_A03	1.685	Arahy.03	4235943		a	b	h	b	b	a	b	a	b	b	a	b	a	b	a	b	b	b	a	-	h	h	b	b	b	b	b	b	a	b	a	a	a	a	b	a	a	b	b	b	b	a	a
A03_1	AX-176814246	AX-176814246_A03	16.183	Arahy.03	7379376		h	b	h	b	b	b	b	a	h	b	a	b	a	b	a	b	b	b	a	a	a	a	a	b	b	b	b	b	a	b	a	a	a	b	b	a	a	b	b	b	b	b	a
A03_1	AX-147215766	AX-147215766_B03	17.492	Arahy.03	10695138		-	h	a	b	h	-	b	a	h	b	a	b	a	b	a	b	-	-	a	a	a	a	a	b	b	b	-	-	a	b	a	a	a	b	b	a	a	b	b	b	b	b	a
A03_1	AX-176814245	AX-176814245_A03	18.322	Arahy.03	7379385		h	b	h	b	h	b	b	a	h	b	a	b	a	b	a	b	-	b	a	a	a	a	a	b	b	b	b	b	a	b	a	a	a	b	b	a	a	b	b	b	b	b	a
A03_1	AX-176819538	AX-176819538_A03	19.322	Arahy.03	8043391		h	b	h	b	h	b	b	a	h	b	a	b	a	b	a	b	b	b	a	a	a	a	a	b	b	b	b	b	a	b	a	a	a	b	b	a	a	b	b	b	b	b	a
A03_1	AX-176813174	AX-176813174_A07	19.76	Arahy.03	44125503		h	b	a	b	h	b	b	a	h	b	a	b	a	b	a	b	b	b	a	a	a	a	a	b	b	b	b	b	a	b	a	a	a	b	b	a	a	b	b	b	b	b	a
A03_1	AX-176808013	AX-176808013_A03	20.991	Arahy.03	8685963		h	b	a	b	a	b	b	a	h	b	a	b	a	b	a	b	b	b	a	a	b	a	a	b	b	b	b	b	a	b	a	a	a	b	b	a	a	b	b	b	b	b	a
A03_1	AX-176812423	AX-176812423_A03	21.43	Arahy.03	8619531		h	b	a	b	a	b	b	a	h	b	a	b	a	b	a	b	-	b	a	a	b	a	a	b	b	-	b	b	a	b	a	a	a	b	b	a	a	b	b	h	b	b	a
A03_1	AX-176801938	AX-176801938_A03	21.757	Arahy.03	8613710		h	b	h	b	a	b	b	a	h	b	a	b	a	b	a	b	b	b	a	a	b	a	a	b	b	b	b	b	a	b	a	a	a	b	b	a	a	b	b	b	b	b	a
A03_1	AX-176820373	AX-176820373_A03	21.757	Arahy.03	8620579		h	b	h	b	a	b	b	a	h	b	a	-	a	b	a	b	b	b	a	a	b	a	a	b	b	b	b	b	a	b	a	a	a	b	b	a	a	b	b	b	b	b	a
A03_1	AX-176823478	AX-176823478_A03	35.545	Arahy.03	20890986		b	b	b	b	a	b	b	a	b	b	a	b	a	b	a	b	b	b	a	a	b	a	a	a	b	b	b	b	a	b	a	a	a	a	b	b	a	b	a	b	a	b	a
A03_1	AX-176812910	AX-176812910_A03	39.38	Arahy.03	24688399		b	b	b	b	a	b	b	a	b	b	a	b	a	b	a	a	b	b	a	a	b	a	a	a	b	b	b	b	a	b	a	a	a	a	b	b	a	b	a	b	a	b	a
A03_1	AX-176794898	AX-176794898_A03	40.38	Arahy.03	26467653		b	b	b	b	b	b	b	a	b	b	a	b	a	b	a	a	b	b	a	a	b	a	a	a	b	b	b	b	a	b	a	a	a	a	b	b	a	b	a	b	a	b	a
A03_1	AX-176800366	AX-176800366_A03	40.597	Arahy.03	25502772		b	b	b	b	b	b	b	a	b	h	a	b	a	b	a	a	b	b	a	a	b	a	a	a	b	b	b	b	a	b	a	a	a	a	b	b	a	b	a	b	a	b	a
A03_1	AX-176816852	AX-176816852_A03	40.815	Arahy.03	25707262		b	b	b	b	b	b	b	a	b	b	a	b	a	b	a	a	b	b	a	a	b	a	a	a	b	b	b	b	a	b	a	a	a	a	b	b	a	b	a	b	a	b	a
A03_1	AX-176807163	AX-176807163_A03	41.032	Arahy.03	25092070		b	b	b	b	b	b	b	a	b	b	a	b	a	b	a	a	b	b	a	a	b	a	a	a	b	b	b	b	a	b	a	a	a	a	b	b	a	b	a	b	a	b	a
A03_1	AX-176797393	AX-176797393_A03	41.25	Arahy.03	25346054		b	b	b	b	b	b	b	a	b	b	a	b	a	b	a	a	b	b	a	a	b	a	a	a	b	b	b	b	a	b	a	a	a	a	b	b	a	b	a	b	a	b	a
A03_1	AX-147216364	AX-147216364_A03	41.577	Arahy.03	25560015		b	b	b	b	b	b	b	a	b	b	a	b	a	b	a	a	b	b	a	a	b	a	a	a	b	b	b	b	a	b	a	a	a	a	b	b	a	b	a	b	a	b	a
A03_1	AX-176819921	AX-176819921_A03	41.795	Arahy.03	26136444		b	b	b	b	b	b	b	a	b	b	-	b	a	b	a	a	b	b	a	a	b	a	-	a	b	b	b	b	a	b	a	-	a	a	b	b	a	b	a	b	a	b	a
A03_1	AX-176798481	AX-176798481_A03	42.07	Arahy.03	25174247		b	-	b	b	b	b	b	a	b	b	a	b	a	b	a	a	b	b	a	a	b	a	a	a	b	b	b	b	a	b	a	a	a	a	b	b	a	b	a	b	a	b	a
A03_1	AX-176812021	AX-176812021_A03	42.2	Arahy.03	25358076		b	b	b	b	b	b	b	a	b	b	a	b	a	b	a	a	b	b	a	a	b	a	a	a	b	b	b	b	a	b	a	a	a	a	b	b	a	b	a	b	a	b	a
A03_1	AX-176811741	AX-176811741_A03	42.341	Arahy.03	26933253		b	b	b	b	b	b	b	a	b	b	a	b	a	b	a	a	b	b	a	a	b	a	a	a	b	b	b	b	a	b	a	a	a	a	b	b	a	b	a	b	a	b	a
A03_1	AX-176807880	AX-176807880_A03	42.348	Arahy.03	26907040		b	b	b	b	b	b	b	a	b	b	a	b	a	b	a	a	b	b	a	a	b	a	a	a	b	b	b	b	a	b	a	a	a	a	b	b	a	b	a	b	a	b	a
A03_1	AX-147216402	AX-147216402_A03	42.559	Arahy.03	27151998		b	b	b	b	b	b	b	a	b	b	a	b	a	b	a	a	b	b	a	a	b	a	a	a	b	b	b	b	a	b	a	a	a	a	b	b	a	b	a	b	a	b	a
A03_1	AX-176800734	AX-176800734_A03	42.776	Arahy.03	26638120		b	b	b	b	b	b	b	a	b	b	a	b	a	b	a	a	b	b	a	a	b	a	a	a	b	b	b	b	a	b	a	a	a	a	b	b	-	b	a	b	a	b	a
A03_1	AX-176797312	AX-176797312_A03	42.885	Arahy.03	26850980		b	b	b	b	b	b	b	a	b	b	a	b	a	b	a	a	b	b	a	a	b	a	a	a	b	b	b	b	a	b	a	a	a	a	b	b	a	b	a	b	a	b	a
A03_1	AX-176797517	AX-176797517_A03	43.152	Arahy.03	26711816		b	b	b	b	b	b	b	a	b	b	a	-	a	b	a	a	b	b	a	a	b	a	a	a	b	b	b	b	a	b	a	a	a	a	b	b	a	b	a	b	a	b	a
A03_1	AX-176823320	AX-176823320_A03	43.429	Arahy.03	27498945		b	b	b	b	b	b	b	a	b	b	a	b	a	b	a	a	b	b	a	a	b	a	a	a	b	b	b	b	a	b	a	a	a	a	b	b	a	b	a	b	a	b	a
A03_1	AX-176810473	AX-176810473_A03	43.429	Arahy.03	27447658		b	b	b	b	b	b	b	a	b	b	a	b	a	b	a	a	b	b	a	a	b	a	a	a	b	b	b	b	a	b	a	a	a	a	b	b	a	b	a	b	a	b	a
A03_1	AX-176793984	AX-176793984_A03	43.429	Arahy.03	27704293		b	b	b	b	b	b	b	a	b	b	a	b	a	b	a	a	b	b	a	a	b	a	a	a	b	b	b	b	a	b	a	a	a	a	b	b	a	b	a	b	a	b	a
A03_1	AX-176818225	AX-176818225_A03	43.646	Arahy.03	28569364		b	b	b	b	b	b	b	a	b	b	a	b	a	b	a	a	b	b	a	a	b	a	a	a	b	b	b	b	a	b	a	a	a	a	b	b	a	b	a	b	a	b	a
A03_1	AX-176796169	AX-176796169_A03	43.864	Arahy.03	28707250		b	b	b	b	b	b	b	a	b	b	a	b	a	b	a	a	b	b	a	a	b	a	a	a	b	b	b	b	a	b	a	a	a	a	b	b	a	b	a	b	a	b	a
A03_1	AX-176816858	AX-176816858_A03	44.979	Arahy.03	30035879		b	b	b	b	b	b	b	a	b	b	a	b	a	b	a	a	b	b	a	a	b	a	a	a	b	b	b	b	a	b	a	a	a	a	b	b	a	b	a	b	a	b	a
A03_1	AX-176815780	AX-176815780_A03	45.087	Arahy.03	29715999		b	b	b	b	b	b	b	a	b	b	a	b	a	b	a	a	b	b	a	a	b	a	a	a	b	b	b	b	a	b	a	a	a	a	b	b	a	b	a	b	a	b	a
A03_1	AX-147216522	AX-147216522_A03	45.305	Arahy.03	30312906		b	b	b	b	b	b	b	a	b	b	a	b	a	b	a	a	b	b	a	a	b	a	a	a	b	b	b	b	a	b	a	a	a	a	b	b	a	b	a	b	a	b	a
A03_1	AX-176819483	AX-176819483_A03	45.965	Arahy.03	29458082		b	b	b	b	b	b	b	a	b	b	a	b	a	b	a	a	b	b	a	a	b	a	a	a	b	b	b	b	a	b	a	a	a	a	b	b	a	b	a	b	a	b	a
A03_1	AX-176811583	AX-176811583_A03	46.738	Arahy.03	30934352		b	b	b	b	b	b	b	a	b	b	a	b	a	b	a	a	b	b	a	a	b	a	a	a	b	b	b	b	a	b	a	a	a	a	b	b	a	b	a	b	a	b	a
A03_1	AX-176814813	AX-176814813_A03	46.955	Arahy.03	31030302		b	b	b	b	b	b	b	a	b	b	a	b	a	b	a	a	b	b	a	a	b	a	a	a	b	b	b	b	a	b	a	a	a	a	b	b	a	b	a	b	a	b	a
A03_1	AX-176807558	AX-176807558_A03	47.173	Arahy.03	31345918		b	b	b	b	b	b	b	a	b	b	a	b	a	b	a	a	b	b	a	a	b	a	a	a	b	b	b	b	a	b	a	a	a	a	b	b	a	b	a	b	a	b	a
A03_1	AX-176811275	AX-176811275_A03	47.173	Arahy.03	31302737		b	b	b	b	b	b	b	a	b	b	a	b	a	b	a	a	b	b	a	a	b	a	a	a	b	b	b	b	a	b	a	a	a	a	b	b	a	b	a	b	a	b	a
A03_1	AX-176812919	AX-176812919_A03	47.39	Arahy.03	31479083		b	b	b	b	b	b	b	a	b	b	a	b	a	b	a	a	b	b	a	a	b	a	a	a	b	b	b	b	a	b	a	a	a	a	b	b	a	b	a	b	a	b	a
A03_1	AX-147216612	AX-147216612_A03	47.39	Arahy.03	33937662		b	b	b	b	b	b	b	a	b	b	a	b	a	b	a	a	b	b	a	a	b	a	a	a	b	b	b	b	a	b	a	a	a	a	b	b	a	b	a	b	a	b	a
A03_1	AX-176820374	AX-176820374_A03	47.718	Arahy.03	33720123		b	b	b	b	b	b	b	a	b	b	a	b	a	b	a	a	b	b	a	a	b	a	a	a	b	b	b	b	a	b	a	a	a	a	b	b	a	b	a	b	a	b	a
A03_1	AX-176808641	AX-176808641_A03	48.126	Arahy.03	32811163		b	b	b	b	b	b	b	a	b	b	a	h	a	b	a	a	b	b	a	a	b	a	a	a	b	b	b	b	a	b	a	a	a	a	b	b	a	b	a	b	a	b	a
A03_1	AX-176814322	AX-176814322_A03	48.264	Arahy.03	32854609		b	b	b	b	b	b	b	a	b	b	a	b	a	b	a	a	b	b	a	a	b	a	a	a	b	b	b	b	a	b	a	a	a	a	b	b	a	b	a	b	a	b	a
A03_1	AX-147216563	AX-147216563_A03	48.702	Arahy.03	31583907		b	b	b	b	b	b	b	a	a	b	a	b	a	b	a	a	-	b	a	a	b	a	a	a	b	b	b	b	a	b	a	a	a	a	b	b	a	b	a	b	a	b	a
A03_1	AX-176812328	AX-176812328_A03	49.139	Arahy.03	32906953		-	b	b	b	b	b	b	a	b	b	a	b	a	b	a	a	b	b	a	a	b	a	a	a	b	b	b	b	a	b	a	a	a	a	b	b	a	b	a	b	a	b	a
A03_1	AX-176804493	AX-176804493_A03	49.688	Arahy.03	35824789		b	b	b	b	b	b	b	a	b	b	a	b	a	b	a	a	b	b	a	a	b	a	a	a	b	b	b	b	a	b	a	a	a	a	b	b	a	b	a	b	a	b	a
A03_1	AX-176811233	AX-176811233_A03	49.796	Arahy.03	35569253		b	b	b	b	b	b	b	a	b	b	a	b	a	b	a	a	b	b	a	a	b	a	-	a	b	b	b	b	a	b	a	a	a	a	b	b	a	b	a	b	a	b	a
A03_1	AX-176793343	AX-176793343_A03	50.124	Arahy.03	36544711		b	b	b	b	b	b	b	a	b	b	a	b	a	b	a	a	b	b	a	a	b	a	a	a	b	b	b	b	a	b	a	a	a	a	b	b	a	b	a	b	a	b	a
A03_1	AX-176800174	AX-176800174_A03	50.232	Arahy.03	36632967		b	b	b	b	b	b	b	a	b	b	a	b	a	b	a	a	b	b	a	a	b	a	a	a	b	b	b	b	a	b	a	a	a	a	b	b	a	b	a	b	a	b	a
A03_1	AX-176807387	AX-176807387_A03	50.34	Arahy.03	36552180		b	b	b	b	b	b	b	a	b	b	a	b	a	b	a	a	b	b	a	a	b	a	a	a	b	b	b	b	a	b	a	a	a	a	b	b	a	b	a	b	a	b	a
A03_1	AX-177644426	AX-177644426_A03	50.449	Arahy.03	37645339		b	b	b	b	b	b	b	a	b	b	a	b	a	b	a	a	b	b	a	a	b	a	a	a	b	b	b	b	a	b	a	a	a	a	b	b	a	b	a	b	a	b	a
A03_1	AX-176810109	AX-176810109_A03	50.449	Arahy.03	37652165		b	b	b	b	b	b	b	a	b	b	a	b	a	b	a	a	b	b	a	a	b	a	a	a	b	b	b	b	a	b	a	a	a	a	b	b	a	b	a	b	a	b	a
A03_1	AX-176816894	AX-176816894_A03	50.776	Arahy.03	38083106		b	b	b	b	b	b	b	a	b	b	a	b	a	b	a	a	b	b	a	a	b	a	a	a	b	b	b	b	a	b	a	a	a	a	b	b	a	b	a	b	a	b	a
A03_1	AX-176821521	AX-176821521_A03	51.663	Arahy.03	39000006		b	b	b	b	b	b	b	a	b	b	b	b	a	b	a	a	b	b	a	a	b	a	a	a	b	b	b	b	a	b	a	a	a	a	b	b	a	b	a	b	a	a	a
A03_1	AX-176818721	AX-176818721_A03	51.663	Arahy.03	38531993		b	b	b	b	b	b	b	a	b	b	b	b	a	b	a	a	b	b	a	a	b	a	a	a	b	b	b	b	a	b	a	a	a	a	b	b	a	b	a	b	a	a	a
A03_1	AX-176814340	AX-176814340_A03	52.145	Arahy.03	39666946		-	b	b	b	b	b	b	a	b	b	b	b	a	b	a	a	b	b	a	a	b	a	a	a	a	b	b	b	a	b	a	a	a	a	b	b	a	b	a	b	a	a	a
A03_1	AX-176814341	AX-176814341_A03	52.762	Arahy.03	39747959		h	b	b	b	b	b	b	a	b	b	b	b	a	b	a	a	b	b	a	a	b	a	a	a	a	b	b	b	a	b	a	a	a	a	b	b	a	b	a	b	a	a	a
A03_1	AX-176806110	AX-176806110_A03	53.334	Arahy.03	40051412		h	b	b	b	b	b	b	a	b	b	b	b	a	b	a	a	b	b	a	a	b	a	a	a	a	b	b	b	a	b	a	a	a	a	b	b	a	b	a	b	a	a	a
A03_1	AX-177639348	AX-177639348_A03	53.494	Arahy.03	40137385		h	b	b	b	b	b	b	a	b	b	b	b	a	b	a	a	b	b	a	a	b	a	a	a	a	b	b	b	a	b	a	a	a	a	b	b	a	b	a	b	a	a	a
A03_1	AX-147216730	AX-147216730_A03	53.637	Arahy.03	40086489		h	b	b	b	b	b	b	a	b	b	b	b	a	b	a	a	b	b	a	a	b	a	a	a	a	b	b	b	a	b	a	a	a	a	b	b	a	b	a	b	a	a	a
A03_1	AX-176808259	AX-176808259_A03	53.855	Arahy.03	39925511		-	b	-	b	b	b	b	a	b	b	b	b	a	b	a	a	-	b	a	a	b	a	a	a	a	b	b	b	a	b	a	a	a	a	b	b	a	b	a	b	a	a	a
A03_1	AX-176820272	AX-176820272_A03	53.856	Arahy.03	40454274		h	b	b	b	b	b	b	a	b	b	b	b	a	b	a	a	b	b	a	a	b	a	a	a	a	b	b	b	a	b	a	a	a	a	b	b	a	b	a	b	a	a	a
A03_1	AX-147216731	AX-147216731_A03	54.183	Arahy.03	40088560		h	b	b	b	b	b	b	a	b	b	b	b	a	b	a	a	b	-	a	a	b	a	a	a	a	b	b	b	a	b	a	a	a	a	b	b	a	b	a	b	a	a	a
A03_1	AX-176820561	AX-176820561_A03	54.401	Arahy.03	40432559		h	b	b	b	b	b	b	a	b	b	b	b	a	b	a	a	b	b	a	a	b	a	a	a	a	b	b	b	a	b	a	a	a	a	b	b	a	b	a	b	a	a	a
A03_1	AX-176806322	AX-176806322_A03	54.619	Arahy.03	40791454		h	b	b	b	b	b	b	a	b	b	b	b	a	b	a	a	b	b	a	a	b	a	a	a	a	b	b	b	a	b	a	a	a	a	b	b	a	b	a	b	a	a	a
A03_1	AX-176799519	AX-176799519_A03	54.619	Arahy.03	40677427		h	b	b	b	b	b	b	a	b	b	b	b	a	b	a	a	b	b	a	a	b	a	a	a	a	b	b	b	a	b	a	a	a	a	b	b	a	b	a	b	a	a	a
A03_1	AX-176801846	AX-176801846_A03	55.056	Arahy.03	41515123		h	b	b	b	b	b	b	a	b	b	b	b	a	b	a	a	b	b	a	b	b	b	a	a	a	b	b	b	a	b	-	a	a	a	b	b	a	b	a	b	a	a	a
A03_1	AX-176813674	AX-176813674_B09	55.056	Arahy.03	33094528		h	b	b	b	b	b	b	a	b	b	b	b	a	b	a	a	b	b	a	b	b	b	a	a	a	b	b	b	a	b	a	a	a	a	b	-	a	b	a	b	a	a	a
A03_1	AX-176804097	AX-176804097_A03	55.172	Arahy.03	41127540		h	b	b	b	b	b	b	a	b	b	b	b	a	b	a	a	b	b	a	b	b	b	a	a	a	b	b	b	a	b	a	a	a	a	b	b	a	b	a	b	a	a	a
A03_1	AX-176791823	AX-176791823_B08	55.273	Arahy.03	134887444		h	b	b	b	b	b	b	a	b	b	b	b	a	b	a	a	b	b	a	b	b	b	a	a	a	b	b	b	a	b	a	a	a	a	b	b	a	b	a	b	a	a	a
A03_1	AX-147216763	AX-147216763_A03	55.382	Arahy.03	42556445		-	b	b	b	b	b	b	a	b	b	b	b	a	b	a	a	b	b	a	b	b	b	a	a	a	b	b	b	a	b	a	a	a	a	b	b	a	b	a	b	a	a	a
A03_1	AX-176800155	AX-176800155_A03	55.498	Arahy.03	42281696		h	b	b	b	b	b	b	a	b	b	b	b	a	b	a	a	b	b	a	b	b	b	a	a	a	b	b	b	a	b	a	a	a	a	b	b	a	b	a	b	a	a	a
A03_1	AX-176820964	AX-176820964_A03	56.952	Arahy.03	42829321		a	b	b	b	b	b	b	a	b	b	b	b	a	b	a	a	b	b	a	b	b	b	a	a	a	b	b	b	a	b	a	a	a	a	b	b	a	b	a	b	a	a	a
A03_1	AX-176822358	AX-176822358_A03	59.256	Arahy.03	43096890		h	b	b	b	b	b	b	a	b	b	b	b	a	b	a	a	a	b	a	b	b	b	a	a	a	b	b	b	a	b	a	a	a	a	b	b	a	b	a	b	a	a	a
A03_1	AX-176801875	AX-176801875_A03	61.881	Arahy.03	43121521		b	-	-	b	b	b	b	a	b	h	b	b	a	b	a	a	a	b	a	b	-	b	a	a	a	b	b	-	a	b	a	a	a	a	b	b	a	b	a	b	a	a	a
A03_2	AX-176791328	AX-176791328_A03	0	Arahy.03	142753747		b	b	b	b	a	b	a	a	b	b	b	a	a	a	b	h	b	b	a	b	a	b	b	a	b	b	a	b	a	a	a	b	b	a	h	-	a	b	a	b	b	b	b
A03_2	AX-176796674	AX-176796674_A03	0	Arahy.03	142830893		b	b	b	b	a	b	a	a	b	b	b	a	a	a	b	h	b	b	a	b	a	b	b	a	b	b	a	b	a	a	a	b	b	a	h	b	a	b	a	b	b	b	b
A03_2	AX-147246237	AX-147246237_A03	0.217	Arahy.03	142609576		b	b	b	b	a	b	a	a	b	b	b	a	a	a	b	h	b	b	a	b	a	b	b	a	b	b	a	b	a	a	a	b	b	a	h	b	a	b	a	b	b	b	b
A03_2	AX-176817031	AX-176817031_A03	0.99	Arahy.03	142532954		b	b	b	-	a	b	-	a	-	b	b	a	a	a	b	h	b	b	a	b	a	b	-	a	b	b	a	b	a	a	a	-	b	a	h	b	a	b	a	-	b	b	-
A03_2	AX-176808557	AX-176808557_A03	1.358	Arahy.03	142501098		b	b	b	b	a	b	a	a	b	b	b	a	a	a	b	h	b	b	a	b	a	b	b	a	b	b	a	b	a	a	a	b	b	a	h	b	a	b	a	b	b	b	b
A03_2	AX-176805269	AX-176805269_A03	2.094	Arahy.03	142097768		b	b	b	b	a	b	a	a	b	b	b	a	a	-	b	h	b	b	a	b	a	b	b	a	b	b	a	b	a	a	a	b	b	b	h	a	a	b	a	b	b	b	b
A03_2	AX-176804433	AX-176804433_A03	2.312	Arahy.03	142113815		b	b	b	b	a	b	a	a	b	b	b	a	a	a	b	h	b	b	a	b	a	b	b	a	b	b	a	b	a	a	a	b	b	b	h	a	a	b	a	b	b	b	b
A03_2	AX-176806216	AX-176806216_A03	2.972	Arahy.03	142046091		b	b	b	b	a	b	a	a	b	b	b	a	a	a	b	-	b	b	a	b	a	b	b	a	b	b	a	b	b	a	a	b	b	b	h	a	a	b	a	b	b	b	b
A03_2	AX-176792403	AX-176792403_A03	3.352	Arahy.03	142045657		b	b	b	b	a	b	a	a	b	b	b	a	a	a	b	-	b	b	a	b	a	b	b	a	b	b	a	b	b	a	a	b	b	b	-	a	a	b	a	b	b	b	b
A03_2	AX-176813189	AX-176813189_A03	3.739	Arahy.03	142028233		b	b	b	b	a	b	a	a	b	b	b	a	a	a	b	h	b	b	a	b	a	b	b	a	b	b	a	b	b	a	a	b	b	b	h	a	a	b	a	b	b	b	b
A03_2	AX-147246199	AX-147246199_A03	4.399	Arahy.03	141976996		b	b	b	b	a	b	a	a	b	b	b	-	a	a	b	h	b	b	a	b	a	b	b	a	b	b	a	b	b	a	a	b	b	b	h	a	a	b	-	b	b	b	b
A03_2	AX-176800826	AX-176800826_A03	5.06	Arahy.03	141820773		b	b	b	b	a	b	a	a	b	b	b	a	a	a	b	h	b	b	a	b	a	b	b	a	b	b	a	b	b	a	a	b	b	b	h	a	a	b	a	b	b	b	b
A03_2	AX-147218522	AX-147218522_B03	5.833	Arahy.03	143850549		b	b	b	b	a	b	a	a	b	b	b	a	a	a	b	h	b	b	a	b	a	b	b	a	b	b	a	b	b	a	a	b	b	b	h	a	a	b	a	b	b	b	b
A03_2	AX-176792339	AX-176792339_A03	6.382	Arahy.03	141721088		b	b	b	b	a	b	a	a	b	b	b	a	a	a	b	h	b	b	a	b	a	b	b	a	b	b	a	b	b	a	a	b	b	b	h	a	a	b	a	b	b	b	b
A03_2	AX-147218510	AX-147218510_B03	7.728	Arahy.03	143724077		b	b	b	b	a	b	a	a	b	b	b	a	a	a	b	h	b	a	a	b	a	b	b	a	b	b	a	b	b	a	a	b	b	b	h	a	a	b	a	b	b	b	b
A03_2	AX-147218511	AX-147218511_A03	8.211	Arahy.03	141623879		b	b	b	b	a	b	a	a	b	b	b	a	a	a	b	-	b	a	a	b	a	b	b	a	b	b	a	b	b	a	a	b	b	b	-	a	a	b	a	b	b	b	b
A03_2	AX-176800295	AX-176800295_A03	9.014	Arahy.03	141521469		b	b	b	b	a	b	a	a	b	b	b	a	a	a	b	h	b	a	a	b	a	b	b	a	b	b	a	-	b	a	a	b	b	b	h	a	a	b	a	b	b	b	b
A03_2	AX-147218491	AX-147218491_B03	9.602	Arahy.03	143217932		b	b	b	b	a	b	a	a	b	b	b	a	a	a	b	h	h	b	a	b	a	b	b	a	b	b	a	b	b	a	a	b	b	b	h	a	a	b	a	b	b	b	b
A03_2	AX-176810805	AX-176810805_A03	9.929	Arahy.03	141176510		b	b	b	b	a	b	a	a	b	b	b	a	a	a	b	h	h	b	a	b	a	b	b	a	b	b	a	b	b	a	a	b	b	b	h	a	a	b	a	b	b	b	b
A03_2	AX-147218488	AX-147218488_A03	10.929	Arahy.03	141126338		b	b	b	b	a	b	a	a	b	b	b	a	a	a	b	h	h	b	a	b	a	b	b	a	b	b	a	b	b	a	a	b	b	b	h	a	a	b	a	b	h	b	b
A03_2	AX-176817019	AX-176817019_A03	12.87	Arahy.03	140515684		b	b	b	b	a	b	a	a	b	b	b	a	a	a	b	h	b	b	a	b	a	b	h	a	b	b	a	a	b	a	a	b	b	b	h	a	a	b	a	b	h	b	b
A03_2	AX-176798364	AX-176798364_A03	13.197	Arahy.03	140272329		b	b	b	b	a	b	a	a	b	b	b	a	a	a	b	h	b	b	a	b	a	b	h	a	b	b	a	a	b	a	a	b	b	b	h	a	a	b	a	b	h	b	b
A03_2	AX-147218426	AX-147218426_A03	13.339	Arahy.03	140328390		b	b	b	b	a	b	a	a	b	b	b	a	a	a	b	h	b	b	a	b	a	b	h	a	b	b	a	a	b	a	a	b	b	b	h	a	a	b	a	b	h	b	b
A03_2	AX-176819928	AX-176819928_A03	14.306	Arahy.03	139984674		b	b	b	b	a	b	a	-	b	b	b	h	a	a	b	h	-	b	a	b	a	b	-	a	b	b	a	a	b	a	a	b	b	b	-	a	a	b	a	b	-	b	b
A03_2	AX-176817012	AX-176817012_A03	15.077	Arahy.03	139950725		b	b	b	b	a	b	a	a	-	b	-	-	a	a	b	h	b	b	a	b	a	b	-	a	b	b	a	a	b	a	a	b	b	-	h	a	a	b	a	h	h	b	b
A03_2	AX-176817015	AX-176817015_A03	16.793	Arahy.03	139814062		b	b	b	b	a	b	a	a	b	b	b	a	a	a	b	h	b	b	a	b	a	b	h	a	b	b	a	a	b	a	a	b	b	b	h	a	a	b	h	b	h	b	b
A03_2	AX-176814493	AX-176814493_A03	19.473	Arahy.03	139428213		b	b	b	b	a	b	a	a	b	b	b	a	a	a	b	h	b	b	a	b	a	b	h	a	b	b	a	a	b	a	a	a	b	-	h	a	a	b	b	b	h	b	b
A03_2	AX-147218352	AX-147218352_B03	19.801	Arahy.03	141398682		b	b	b	b	a	b	a	a	b	b	b	a	a	a	b	h	b	b	a	b	a	b	h	a	b	b	a	a	b	a	a	a	b	b	h	a	a	b	b	b	h	b	b
A03_2	AX-147234092	AX-147234092_A03	20.019	Arahy.03	139207556		b	b	b	b	a	b	a	-	b	b	b	-	a	a	b	h	b	b	a	b	a	b	h	a	b	b	a	a	b	a	a	a	b	b	h	a	a	b	b	b	h	b	b
A03_2	AX-147245997	AX-147245997_A03	20.457	Arahy.03	139130453		b	b	b	b	a	b	a	a	b	b	b	a	a	a	b	h	b	b	a	b	a	b	h	a	b	b	a	a	b	a	a	a	b	b	h	a	a	b	b	b	h	b	b
A03_2	AX-147218328	AX-147218328_A03	20.457	Arahy.03	138927749		b	b	b	b	a	b	a	a	b	b	b	a	a	a	b	h	b	b	a	b	a	b	h	a	b	b	a	a	b	a	a	a	b	b	h	a	a	b	b	b	h	b	b
A03_2	AX-176794041	AX-176794041_A03	22.396	Arahy.03	138733804		b	b	b	b	a	b	a	a	b	b	b	a	a	a	b	a	b	b	a	b	a	b	h	a	a	b	a	a	b	a	a	a	b	b	h	a	a	b	b	b	b	b	b
A03_2	AX-147218301	AX-147218301_A03	23.742	Arahy.03	138568030		b	b	b	b	a	b	a	a	b	b	b	a	a	a	b	a	b	b	a	b	a	b	h	a	a	b	a	a	b	a	a	a	b	a	h	a	a	b	b	b	b	b	b
A03_2	AX-147245927	AX-147245927_A03	24.63	Arahy.03	138277501		b	b	b	b	a	b	b	a	b	b	b	a	a	a	b	a	h	b	a	b	a	b	h	a	a	b	a	a	b	a	a	a	b	a	h	a	a	b	b	b	b	b	b
A04	AX-176797879	AX-176797879_A08	0	Arahy.04	30277869		h	h	b	b	a	h	a	h	b	-	b	b	a	b	h	-	b	b	b	h	b	h	a	h	a	b	h	a	h	a	h	a	a	-	-	a	h	a	a	h	h	a	h
A04	AX-176815499	AX-176815499_A04	3.031	Arahy.04	125599371		h	h	b	b	a	h	a	b	b	h	b	-	a	b	h	h	b	b	b	h	b	h	a	b	a	b	b	a	-	a	h	a	a	h	b	-	-	-	a	a	b	b	h
A04	AX-176805631	AX-176805631_A04	3.534	Arahy.04	125231476		h	h	b	b	a	h	a	b	b	h	b	h	a	b	h	h	b	b	b	h	b	h	a	b	a	b	b	a	h	a	h	a	a	h	b	a	h	a	a	a	b	-	h
A04	AX-176799894	AX-176799894_A04	4.362	Arahy.04	124267109		h	h	b	b	a	h	a	b	b	h	b	h	a	a	h	h	b	b	b	h	b	h	a	b	a	b	b	a	h	a	h	a	a	h	b	a	h	a	a	-	b	b	h
A04	AX-147221052	AX-147221052_A04	5.571	Arahy.04	123482674		h	h	b	b	a	h	a	-	b	b	b	h	a	a	h	h	b	b	b	h	-	h	a	b	a	b	b	a	h	a	h	a	a	h	b	a	h	a	a	h	h	b	h
A04	AX-176814760	AX-176814760_A04	6.703	Arahy.04	124249781		h	h	b	b	a	h	a	b	b	h	b	h	a	a	h	h	b	b	b	h	b	h	a	b	a	b	b	a	h	a	h	a	a	h	b	a	h	a	a	h	b	b	h
A04	AX-147248679	AX-147248679_A04	7.141	Arahy.04	124819137		h	h	b	b	a	h	a	b	b	h	b	h	a	b	h	h	b	b	b	h	b	h	a	b	a	b	b	a	h	a	h	a	a	h	b	a	h	a	a	h	b	b	h
A04	AX-147221125	AX-147221125_A04	7.249	Arahy.04	124566187		h	h	b	b	a	h	a	b	b	h	b	h	a	b	h	h	b	b	b	h	b	h	a	b	a	b	b	a	h	a	h	a	a	h	b	a	h	a	a	h	b	-	h
A04	AX-176809970	AX-176809970_A04	7.687	Arahy.04	123592711		h	h	b	b	a	h	a	b	b	h	b	h	a	a	h	h	b	b	b	h	b	h	a	b	a	b	b	a	h	a	h	a	a	h	b	a	h	a	a	h	b	b	h
A04	AX-176819644	AX-176819644_A04	28.569	Arahy.04	118680323		b	a	b	a	b	a	a	b	b	b	b	a	a	a	a	a	b	b	b	a	b	a	a	b	a	b	b	a	a	a	a	a	a	h	b	a	a	a	a	a	b	b	a
A04	AX-176802283	AX-176802283_A04	34.175	Arahy.04	117632573		b	a	b	a	b	a	a	b	b	b	b	a	a	a	a	a	b	b	b	a	a	a	a	b	a	b	b	a	a	a	a	a	b	h	b	a	a	a	a	a	b	b	a
A04	AX-147248027	AX-147248027_A04	54.865	Arahy.04	110019004		b	a	-	a	b	a	b	b	b	b	b	a	a	a	b	h	b	b	h	a	a	a	a	-	b	b	a	a	a	b	a	a	b	a	a	a	a	b	b	h	b	b	a
A04	AX-147248029	AX-147248029_A04	55.107	Arahy.04	109253895		b	a	b	a	b	a	b	b	b	b	b	a	a	a	b	h	b	b	h	a	a	a	a	b	b	b	a	a	a	b	a	a	b	a	a	a	a	b	b	-	b	b	a
A04	AX-147248028	AX-147248028_B04	55.109	Arahy.04	119749759		b	a	b	a	b	a	b	b	b	-	b	a	a	a	b	h	b	-	-	a	a	a	a	b	b	b	a	a	a	-	a	a	b	a	a	a	a	b	b	a	b	b	a
A04	AX-176813046	AX-176813046_A04	55.217	Arahy.04	110077870		b	a	b	a	b	a	b	b	b	b	b	a	a	a	b	h	b	b	h	a	a	a	a	b	b	b	a	a	a	b	a	a	b	a	a	a	a	b	b	h	b	b	a
A04	AX-176817254	AX-176817254_A04	55.434	Arahy.04	108590863		b	a	b	a	b	a	b	b	b	b	b	a	a	a	b	h	b	b	-	a	a	a	a	b	b	b	a	a	a	b	a	a	b	a	a	a	a	b	b	h	b	b	a
A04	AX-176795783	AX-176795783_A04	55.434	Arahy.04	109112911		b	a	b	a	b	a	b	b	b	b	b	a	a	a	b	h	b	b	h	a	a	a	a	b	b	b	a	a	a	b	a	a	b	a	a	a	a	b	b	h	b	b	a
A04	AX-147220444	AX-147220444_A04	57.372	Arahy.04	107930603		b	a	b	a	b	a	b	b	b	b	b	a	a	a	b	h	b	b	h	a	a	a	a	b	b	b	a	a	a	b	a	a	b	a	a	a	a	b	b	h	b	b	a
A04	AX-176804895	AX-176804895_A04	57.779	Arahy.04	107743634		b	a	-	a	b	a	b	b	b	b	b	a	a	a	b	h	b	b	h	a	a	a	a	b	h	-	a	a	a	b	a	a	b	a	a	a	a	b	b	-	-	b	a
A04	AX-176810654	AX-176810654_A04	57.938	Arahy.04	107335333		b	a	b	a	b	a	b	b	b	b	b	a	a	a	b	h	b	b	h	a	a	a	a	b	b	b	a	a	a	b	a	a	b	a	a	a	a	b	b	h	b	b	a
A04	AX-176808960	AX-176808960_A04	58.691	Arahy.04	105495203		b	a	b	a	b	a	b	b	b	b	b	a	a	a	b	b	b	b	h	a	a	a	a	b	b	b	a	a	a	b	a	a	b	a	a	a	a	b	b	h	b	b	a
A04	AX-176814744	AX-176814744_A04	58.909	Arahy.04	105357156		b	a	b	a	b	a	b	b	b	b	b	a	a	a	b	b	b	b	h	a	a	a	a	b	b	b	a	a	a	b	a	a	b	a	a	a	a	b	b	h	b	b	a
A04	AX-176818593	AX-176818593_A04	58.909	Arahy.04	105449071		b	a	b	a	b	a	b	b	b	b	b	a	a	a	b	b	b	b	h	a	a	a	a	b	b	b	a	a	a	b	a	a	b	a	a	a	a	b	b	h	b	b	a
A04	AX-147247959	AX-147247959_A04	59.683	Arahy.04	104405599		b	a	b	a	b	a	b	b	b	b	b	a	a	a	b	b	b	b	b	a	a	a	a	b	b	b	a	a	a	b	a	a	b	a	a	a	a	b	b	-	b	b	a
A04	AX-176806758	AX-176806758_A04	61.224	Arahy.04	104151373		b	a	b	a	b	a	b	b	b	b	b	a	a	a	b	b	b	b	b	a	a	a	a	b	b	b	a	a	a	b	a	a	h	a	a	a	a	b	b	h	b	b	a
A04	AX-147247946	AX-147247946_A04	61.929	Arahy.04	103093361		b	a	b	a	b	a	b	b	b	b	b	a	a	a	b	b	b	b	h	a	a	a	a	b	b	b	a	a	a	b	a	a	b	a	a	a	a	b	b	a	b	b	a
A04	AX-176793681	AX-176793681_A04	62.318	Arahy.04	103463909		b	a	b	a	b	a	b	b	b	b	b	a	a	a	b	b	b	b	h	a	a	a	a	b	b	b	a	a	a	b	a	a	b	a	a	a	a	b	b	h	b	b	a
A04	AX-176796616	AX-176796616_A04	63.368	Arahy.04	101761869		b	a	b	a	b	a	b	b	b	b	b	a	a	a	b	b	b	b	h	a	b	a	a	b	b	b	a	a	a	b	a	a	b	a	a	a	a	b	b	h	b	b	a
A04	AX-176817231	AX-176817231_A04	63.476	Arahy.04	102624003		b	a	b	a	b	a	b	b	b	b	-	a	a	a	b	b	b	b	h	a	b	a	a	b	b	-	a	a	a	b	a	a	b	a	a	a	a	b	b	h	b	b	a
A04	AX-176802164	AX-176802164_A04	63.476	Arahy.04	102134091		b	a	b	a	-	a	b	b	b	b	b	a	a	a	b	b	b	b	-	a	b	a	a	b	b	b	a	a	a	b	a	a	b	a	a	a	a	b	b	h	b	b	a
A04	AX-176802168	AX-176802168_A04	63.485	Arahy.04	101559074		b	a	b	a	b	a	b	b	b	b	b	a	a	a	b	b	b	b	h	a	b	a	a	b	b	b	a	a	a	b	a	a	b	a	a	a	a	b	b	h	b	b	a
A04	AX-176793394	AX-176793394_A04	63.694	Arahy.04	102083650		b	a	b	a	b	a	b	b	b	b	b	a	a	a	b	b	b	b	h	a	b	a	a	b	b	b	a	a	a	b	a	a	b	a	a	a	a	b	b	h	b	b	a
A04	AX-176814701	AX-176814701_A04	63.911	Arahy.04	101346762		b	a	b	a	b	a	b	b	b	b	b	a	a	a	b	b	b	b	h	a	b	a	a	b	b	b	a	a	a	b	a	a	b	a	a	a	a	b	b	h	b	b	a
A04	AX-147220347	AX-147220347_A04	63.911	Arahy.04	101089895		b	a	b	a	b	a	b	b	b	b	b	a	a	a	b	b	b	b	h	a	b	a	a	b	b	b	a	a	a	b	a	a	b	a	a	a	a	b	b	h	b	b	a
A04	AX-176799304	AX-176799304_A04	64.129	Arahy.04	99839997		b	a	b	a	b	a	b	b	b	b	b	a	a	a	b	b	b	b	h	a	b	a	a	b	b	b	a	a	a	b	a	a	b	b	a	a	a	b	b	h	b	b	a
A04	AX-176797582	AX-176797582_A04	64.237	Arahy.04	100920325		b	a	b	a	b	a	b	b	b	b	b	a	a	a	b	b	b	b	h	a	b	a	a	b	b	b	a	a	a	b	a	a	b	b	a	a	a	b	b	h	b	b	a
A04	AX-176802295	AX-176802295_A04	64.345	Arahy.04	100036763		b	a	b	a	b	a	b	b	b	b	b	a	a	a	b	b	b	b	h	a	b	a	a	b	b	b	a	a	a	b	a	a	b	b	a	a	a	b	b	h	b	b	a
A04	AX-176819262	AX-176819262_B04	64.642	Arahy.04	108381454		b	a	b	a	b	a	b	b	b	b	b	a	a	a	b	b	b	b	h	a	b	a	a	b	b	b	a	a	a	b	a	a	b	b	a	a	a	b	b	h	b	b	a
A04	AX-176820854	AX-176820854_A04	65.222	Arahy.04	98678524		b	a	b	a	b	a	b	b	b	b	b	a	a	a	b	b	b	b	h	a	b	a	a	b	b	b	a	a	a	b	h	a	b	b	a	a	a	b	b	h	b	b	a
A04	AX-176793197	AX-176793197_A04	65.549	Arahy.04	98532524		b	a	b	a	b	a	b	b	b	b	b	a	a	a	b	b	b	b	h	a	b	a	a	b	b	b	a	a	a	b	a	a	b	b	a	a	a	b	b	h	b	b	a
A04	AX-176803787	AX-176803787_A04	65.766	Arahy.04	98751660		b	a	b	a	b	a	b	b	b	b	b	a	a	a	b	b	b	b	h	a	b	a	a	b	b	b	a	a	a	b	a	a	b	b	a	a	a	b	b	h	b	b	a
A04	AX-176817223	AX-176817223_A04	65.825	Arahy.04	99036612		b	a	b	a	b	a	b	b	b	b	b	a	a	a	b	b	b	b	h	a	b	a	a	b	b	b	a	a	a	b	a	a	b	b	a	a	a	b	b	h	b	b	a
A04	AX-176820169	AX-176820169_A04	65.875	Arahy.04	98789596		b	a	b	a	b	-	b	b	b	b	b	a	a	a	b	b	b	b	h	-	b	a	a	b	b	b	-	a	a	b	a	a	b	b	a	a	a	b	b	h	b	b	a
A04	AX-176805211	AX-176805211_A04	66.271	Arahy.04	83808938		b	a	b	a	b	a	b	b	b	b	b	a	a	a	b	b	b	-	h	a	b	a	a	b	b	b	a	a	a	b	a	a	b	b	a	a	a	b	b	h	b	b	a
A04	AX-176820369	AX-176820369_A04	66.529	Arahy.04	95309394		b	a	b	a	b	a	b	b	b	b	b	a	a	a	b	b	b	b	h	a	b	a	-	b	b	b	a	a	a	b	a	a	b	b	a	a	a	b	b	h	b	b	a
A04	AX-176800610	AX-176800610_A04	66.747	Arahy.04	88081729		b	a	b	a	b	a	b	b	b	b	b	a	a	a	b	b	b	b	h	a	b	a	a	b	b	b	a	a	a	b	a	a	b	b	a	a	a	b	b	h	b	b	a
A04	AX-176821935	AX-176821935_A04	67.184	Arahy.04	83301589		b	a	b	a	b	a	b	b	b	b	b	a	a	a	b	b	b	b	h	a	b	a	a	b	b	b	a	a	h	b	a	a	b	b	a	a	a	b	b	h	b	b	a
A04	AX-176800557	AX-176800557_A04	67.507	Arahy.04	96335449		b	a	b	a	b	a	b	b	b	b	b	a	a	a	b	b	b	b	h	a	b	a	a	b	b	b	a	a	a	b	a	a	b	b	a	a	a	b	b	h	b	b	a
A04	AX-176800965	AX-176800965_A04	67.512	Arahy.04	86232930		b	a	b	a	b	a	b	b	b	b	b	a	a	a	b	b	b	-	h	a	b	a	a	b	b	b	a	a	a	b	a	a	b	b	a	a	a	b	b	h	b	b	a
A04	AX-176821087	AX-176821087_A04	67.512	Arahy.04	85732853		b	a	b	a	b	a	b	b	b	b	b	a	a	a	b	b	b	b	h	a	b	-	a	b	b	b	a	a	a	-	a	a	b	b	a	a	a	b	b	h	b	b	a
A04	AX-176813531	AX-176813531_A04	67.512	Arahy.04	91502100		b	a	b	a	b	a	b	b	b	b	b	a	a	a	b	b	b	b	h	a	b	a	a	b	b	b	a	a	a	b	a	a	b	b	a	a	a	-	b	h	b	b	a
A04	AX-176806777	AX-176806777_A04	67.62	Arahy.04	97834564		b	a	b	a	b	a	b	b	b	b	b	a	a	a	b	b	b	b	h	a	b	a	a	b	b	b	a	a	a	b	a	a	-	b	a	a	a	b	b	h	b	b	a
A04	AX-176811509	AX-176811509_A04	67.728	Arahy.04	83321125		b	a	b	a	b	a	b	b	b	b	b	a	a	a	b	b	b	b	h	a	b	a	a	b	b	b	a	a	a	b	a	a	b	b	a	a	a	b	b	h	b	b	a
A04	AX-176804386	AX-176804386_A04	67.728	Arahy.04	97887582		b	a	b	a	b	a	b	b	b	b	b	a	a	a	b	b	b	b	h	a	b	a	a	b	b	b	a	a	a	b	a	a	b	b	a	a	a	b	b	h	b	b	a
A04	AX-176815608	AX-176815608_A04	67.891	Arahy.04	89113399		b	a	b	a	b	a	b	b	b	b	b	a	a	a	b	b	b	b	h	a	b	a	a	b	b	b	a	a	a	b	a	a	b	b	a	a	a	b	h	h	b	b	a
A04	AX-176793670	AX-176793670_A04	68.054	Arahy.04	94580581		b	a	b	a	b	a	b	b	b	b	b	a	a	a	b	b	b	b	h	a	b	a	a	b	b	b	a	a	a	b	a	a	b	b	a	a	a	b	b	h	b	b	a
A04	AX-147220245	AX-147220245_A04	68.054	Arahy.04	87156275		b	a	b	a	b	a	b	-	b	b	b	a	a	a	b	b	b	b	h	a	b	a	a	b	b	b	a	a	a	b	a	a	b	b	a	a	a	b	b	h	-	b	a
A04	AX-147219865	AX-147219865_A04	68.065	Arahy.04	96005375		b	a	b	a	b	a	b	b	b	b	b	a	a	a	b	b	b	b	h	a	b	a	a	b	b	b	a	a	a	b	a	a	b	b	a	a	a	-	b	h	b	b	a
A04	AX-176818240	AX-176818240_A04	68.271	Arahy.04	79536523		b	a	b	a	b	a	b	b	b	b	b	a	a	a	b	b	b	b	h	a	b	a	a	b	b	b	a	a	a	b	a	a	b	b	a	a	a	h	b	h	b	b	a
A04	AX-176808024	AX-176808024_A04	68.38	Arahy.04	78580396		b	a	b	a	b	a	b	b	b	b	b	a	a	a	b	b	b	b	h	a	b	a	a	b	b	b	a	a	a	b	a	a	b	b	a	a	a	b	b	h	b	b	a
A04	AX-176802920	AX-176802920_A04	68.707	Arahy.04	82484733		b	a	b	a	b	a	b	b	b	b	b	h	a	a	b	b	b	b	h	a	b	a	a	b	b	b	a	a	a	b	a	a	b	b	a	a	a	b	b	h	b	b	a
A04	AX-176813226	AX-176813226_A04	68.815	Arahy.04	82314066		b	a	b	a	b	a	b	b	b	b	b	h	a	a	b	b	b	b	h	a	b	a	a	b	b	b	a	a	a	b	a	a	b	b	a	a	a	b	b	h	b	b	a
A04	AX-176818237	AX-176818237_A04	69.033	Arahy.04	82488587		b	a	b	a	b	a	b	b	b	b	b	a	a	a	b	b	b	b	h	a	b	a	a	b	b	b	a	a	a	b	a	a	b	b	a	a	a	b	b	h	b	b	a
A04	AX-176817175	AX-176817175_A04	69.141	Arahy.04	81525989		b	a	b	a	b	a	b	b	b	b	b	a	a	a	b	b	b	b	h	a	b	a	a	b	b	b	a	a	a	b	a	a	b	b	a	a	a	b	b	h	b	b	a
A04	AX-147246672	AX-147246672_A04	69.141	Arahy.04	77536645		b	a	b	a	b	a	b	b	b	b	b	a	a	a	b	b	b	b	h	a	b	a	a	b	b	b	a	a	a	b	a	a	b	b	a	a	a	b	b	h	b	b	a
A04	AX-147220134	AX-147220134_A04	69.141	Arahy.04	82448702		b	a	b	a	b	a	b	-	b	b	b	a	a	a	b	b	b	b	h	a	b	a	a	b	b	b	a	a	a	b	a	a	b	b	a	a	a	b	b	h	b	b	a
A04	AX-176817179	AX-176817179_A04	69.141	Arahy.04	78304828		b	a	b	a	b	a	b	b	b	b	b	a	a	a	b	b	b	b	h	a	b	a	a	b	b	b	a	a	a	b	a	a	b	b	a	a	a	b	b	h	b	b	a
A04	AX-176821791	AX-176821791_A04	69.29	Arahy.04	81770352		b	a	b	a	b	a	b	b	b	b	b	a	a	a	b	b	b	b	h	a	b	a	a	b	b	b	a	a	a	b	a	a	b	b	a	a	a	b	b	h	b	b	a
A04	AX-147220301	AX-147220301_A04	69.524	Arahy.04	95831180		b	a	b	a	b	a	b	b	b	b	b	a	a	a	b	b	b	b	h	a	b	a	a	b	b	b	a	a	a	b	a	a	b	b	a	a	a	b	b	h	b	b	a
A04	AX-176818268	AX-176818268_A04	69.717	Arahy.04	96997154		b	a	b	a	b	a	b	b	b	b	b	a	a	a	b	b	b	b	h	h	b	a	-	b	b	b	a	a	a	b	a	a	b	b	a	a	a	b	b	h	b	b	a
A04	AX-176820351	AX-176820351_A04	70.183	Arahy.04	98308726		b	a	b	a	b	a	b	b	b	b	b	h	a	a	b	b	b	b	h	a	b	a	a	b	b	b	a	a	a	b	a	a	b	b	a	a	a	b	b	-	b	b	a
A04	AX-176794277	AX-176794277_A04	70.617	Arahy.04	84850436		b	a	b	a	b	a	b	b	b	b	b	h	a	a	b	b	b	b	h	a	b	a	a	b	b	b	a	a	-	b	a	a	b	b	a	a	a	b	b	a	b	b	a
A04	AX-176793070	AX-176793070_A04	71.175	Arahy.04	94581259		b	a	b	a	b	a	b	b	b	b	b	-	a	a	b	b	b	b	h	a	b	a	a	b	b	b	a	a	a	b	a	a	b	b	a	a	a	b	b	b	b	b	a
A04	AX-176823677	AX-176823677_A04	71.662	Arahy.04	80904259		b	a	b	a	b	a	b	b	b	b	b	a	a	a	b	b	b	b	h	a	b	a	a	b	b	b	a	a	a	b	a	a	b	b	a	a	a	b	b	h	b	b	a
A04	AX-176800527	AX-176800527_A04	72.436	Arahy.04	80052716		b	a	b	a	b	a	b	b	b	b	b	a	a	a	b	b	b	b	-	a	b	a	a	b	b	b	a	a	a	b	a	a	b	b	a	a	a	b	b	h	b	b	a
A04	AX-176799454	AX-176799454_A04	72.874	Arahy.04	83518142		b	a	b	a	b	a	b	b	b	b	b	a	a	a	b	b	b	b	h	a	b	a	a	b	b	b	a	a	a	b	a	a	b	b	a	a	a	b	b	h	b	b	a
A04	AX-176805037	AX-176805037_A04	73.091	Arahy.04	91161868		b	a	-	a	b	a	b	b	b	b	b	a	a	a	h	b	b	b	h	a	b	a	a	b	b	b	a	a	a	b	a	a	b	b	a	a	a	b	b	h	b	b	a
A04	AX-176813109	AX-176813109_A04	73.2	Arahy.04	89708213		b	a	b	a	b	a	b	b	b	b	b	a	a	a	b	b	b	b	h	a	b	a	a	b	b	b	a	a	a	b	a	a	b	b	a	a	a	b	b	h	b	b	a
A04	AX-176807930	AX-176807930_A04	73.207	Arahy.04	93918405		b	a	b	a	b	a	b	b	b	b	b	a	a	a	b	b	b	b	-	a	b	a	a	b	b	b	a	a	a	b	a	a	b	b	a	a	a	b	b	h	b	b	a
A04	AX-176810178	AX-176810178_A04	73.417	Arahy.04	77520338		b	a	b	a	b	a	b	-	b	b	b	a	a	a	b	b	b	b	a	a	b	a	a	b	b	b	a	a	a	b	a	a	b	b	a	a	a	b	b	h	b	b	a
A04	AX-176822665	AX-176822665_A04	73.856	Arahy.04	74923647		b	-	b	a	b	a	b	b	b	b	b	a	a	a	b	b	b	b	h	a	b	a	a	b	b	b	a	a	a	b	a	a	b	b	a	a	a	b	b	h	b	b	a
A04	AX-176804454	AX-176804454_A04	74.073	Arahy.04	75428167		b	a	b	a	b	a	b	b	b	b	b	a	a	a	b	b	b	b	h	a	b	a	a	b	b	b	a	a	a	b	a	a	b	b	a	a	a	b	b	h	b	b	a
A04	AX-176823504	AX-176823504_A04	74.073	Arahy.04	77030020		b	a	b	a	b	a	b	b	b	b	b	a	a	a	b	b	b	b	h	a	b	a	a	b	b	b	a	a	a	b	a	a	b	b	a	a	a	b	b	h	b	b	a
A04	AX-176794127	AX-176794127_A04	74.182	Arahy.04	77031754		b	a	b	a	b	a	b	b	b	b	b	a	a	a	b	b	b	b	h	a	b	a	a	b	b	b	a	a	a	b	a	a	b	b	a	a	a	b	b	h	b	b	a
A04	AX-176801631	AX-176801631_A04	74.399	Arahy.04	77470999		b	a	b	a	b	a	b	b	b	b	b	a	a	a	b	b	b	b	h	a	b	a	a	b	b	b	a	a	a	b	a	a	b	b	a	a	a	b	b	h	b	b	a
A04	AX-176822674	AX-176822674_A04	74.724	Arahy.04	63064536		b	a	b	a	b	a	b	b	b	b	b	a	a	a	b	b	b	b	h	a	b	a	a	b	b	b	a	a	a	b	a	a	b	b	a	a	a	b	b	-	b	b	a
A04	AX-176815310	AX-176815310_A04	74.726	Arahy.04	61518173		b	a	b	a	b	a	b	-	b	b	b	a	a	a	b	-	b	b	h	a	b	a	a	b	b	b	a	-	a	b	a	a	b	b	a	a	a	b	-	h	b	b	a
A04	AX-176820544	AX-176820544_A04	74.726	Arahy.04	64446251		b	a	b	a	b	a	b	b	b	b	b	a	a	a	b	b	b	b	h	a	b	a	a	b	b	b	a	a	a	b	a	-	b	b	a	a	a	b	b	h	b	b	a
A04	AX-176810537	AX-176810537_A04	74.726	Arahy.04	71949730		b	a	b	a	b	a	b	b	b	b	b	a	a	a	b	b	b	b	h	a	b	a	a	b	b	b	a	a	a	b	a	a	b	b	a	a	a	b	b	h	b	b	a
A04	AX-176797377	AX-176797377_A04	74.726	Arahy.04	72818927		b	a	b	a	b	a	b	b	b	b	b	a	a	a	b	b	b	b	h	a	b	a	a	b	b	b	a	a	a	b	a	a	b	b	a	a	a	b	b	h	b	b	a
A04	AX-176822678	AX-176822678_A04	74.726	Arahy.04	60990099		b	a	b	a	b	a	b	b	b	b	b	a	a	a	b	b	b	b	h	a	b	a	a	b	b	b	a	a	a	b	a	a	b	b	a	a	a	b	b	h	b	b	a
A04	AX-176824042	AX-176824042_A04	74.835	Arahy.04	61234518		b	a	b	a	b	a	b	b	b	b	b	a	a	a	b	b	b	b	h	a	b	a	a	b	b	b	a	a	a	b	a	a	b	b	a	a	a	b	b	h	b	b	a
A04	AX-176822062	AX-176822062_A04	75.379	Arahy.04	71928777		b	a	h	a	b	a	b	b	b	b	b	a	a	a	b	b	b	b	h	a	b	a	a	b	-	b	a	a	a	b	-	a	b	b	a	a	a	b	b	h	b	b	a
A04	AX-176799431	AX-176799431_A04	76.048	Arahy.04	62063788		b	a	b	a	b	a	b	b	b	b	b	a	a	a	b	b	b	b	h	a	b	a	a	b	b	b	a	a	a	b	a	a	b	b	a	a	a	b	b	h	b	b	a
A04	AX-176816236	AX-176816236_A04	76.821	Arahy.04	69886986		b	a	b	a	b	a	b	b	b	b	b	a	a	a	b	b	b	b	h	a	b	a	a	b	b	b	a	a	a	b	a	a	b	b	a	a	a	b	b	h	b	b	-
A04	AX-176799389	AX-176799389_B06	77.936	Arahy.04	26960691		b	a	b	a	b	a	b	b	b	b	b	a	a	a	b	b	b	b	a	a	b	a	a	b	b	b	a	a	a	b	a	a	b	b	a	a	a	b	b	a	b	b	a
A04	AX-176811783	AX-176811783_B04	78.486	Arahy.04	88824700		b	a	b	a	b	a	b	-	b	b	b	a	a	a	b	b	b	b	h	a	b	a	a	b	b	b	a	a	a	b	a	a	b	b	a	a	a	b	b	a	b	b	a
A04	AX-176823440	AX-176823440_A04	81.643	Arahy.04	64640744		b	a	b	a	b	a	b	b	b	b	b	a	a	a	b	b	b	b	h	a	b	a	a	b	b	b	a	a	a	b	a	a	b	-	a	a	a	b	-	h	-	b	a
A04	AX-176812925	AX-176812925_A04	85.221	Arahy.04	71510635		b	a	b	a	b	h	b	b	b	b	b	-	a	a	b	b	b	b	h	a	b	a	a	b	b	b	a	a	a	b	a	a	b	b	a	a	a	b	b	h	b	b	a
A04	AX-176822788	AX-176822788_A04	86.844	Arahy.04	89303489		b	-	b	a	b	-	b	b	b	b	b	-	a	a	b	b	b	b	h	a	b	a	a	b	b	b	a	-	a	b	a	a	b	b	a	a	a	b	b	-	b	b	-
A04	AX-177642618	AX-177642618_A04	87.832	Arahy.04	87048131		b	a	b	a	b	a	b	b	b	b	b	a	a	a	b	b	b	b	b	a	b	a	a	b	b	b	a	a	a	b	a	a	b	b	a	a	a	b	b	b	b	b	a
A04	AX-176797290	AX-176797290_A04	87.94	Arahy.04	90398417		b	a	b	a	b	a	b	b	b	b	b	a	a	a	b	b	b	b	b	a	b	a	a	b	b	b	a	a	a	b	a	a	b	b	a	a	a	b	b	b	b	b	a
A04	AX-176814690	AX-176814690_A04	92.29	Arahy.04	95347959		b	a	-	a	b	a	b	b	b	-	h	a	a	h	b	h	b	-	a	a	b	-	a	b	b	b	h	a	a	b	a	a	b	h	a	a	a	b	b	h	h	b	a
A04	AX-176795405	AX-176795405_A04	115.677	Arahy.04	4981788		b	a	b	a	a	a	b	a	b	b	b	a	a	b	a	a	b	b	a	a	a	a	a	a	b	b	b	b	h	b	b	a	b	a	a	a	b	b	b	h	b	b	a
A04	AX-147246898	AX-147246898_B04	115.682	Arahy.04	6229102		b	a	b	a	a	a	b	a	b	b	b	a	a	b	a	a	b	b	a	a	a	a	a	a	b	b	b	b	h	b	b	a	b	a	a	a	b	b	b	h	b	b	a
A04	AX-176808041	AX-176808041_A04	116.004	Arahy.04	5071707		b	a	b	a	a	a	b	a	b	b	b	a	a	b	a	a	b	b	a	a	a	a	a	a	b	b	b	b	h	b	b	a	b	a	a	a	b	b	b	h	b	b	a
A04	AX-176797012	AX-176797012_A04	116.222	Arahy.04	4957946		b	a	b	a	a	a	b	a	b	b	b	a	a	b	a	a	b	b	a	a	a	a	a	a	b	b	b	b	h	b	b	a	b	a	a	a	b	b	b	h	b	b	a
A04	AX-176814531	AX-176814531_A04	117.685	Arahy.04	4742495		b	a	b	a	a	a	b	a	b	b	b	a	a	b	a	a	b	b	a	a	a	a	a	a	b	b	b	b	h	b	b	a	a	a	a	a	b	b	b	h	b	b	a
A04	AX-147219171	AX-147219171_A04	118.233	Arahy.04	4588080		b	a	b	a	a	a	b	a	b	b	b	a	a	a	a	a	b	b	a	a	a	a	a	a	b	b	b	b	h	b	b	a	a	a	a	a	b	b	b	h	b	b	a
A04	AX-176817054	AX-176817054_A04	118.342	Arahy.04	4631689		b	a	b	a	a	a	b	a	b	b	b	a	a	a	a	a	b	b	a	a	a	a	a	a	b	b	b	b	h	b	b	a	a	a	a	a	b	b	b	h	b	b	a
A04	AX-147219059	AX-147219059_A04	127.844	Arahy.04	3054484		b	a	b	a	h	a	b	a	b	b	b	a	b	a	a	a	b	b	a	a	a	a	a	a	b	b	b	b	a	b	b	b	a	a	b	a	b	b	b	a	b	b	a
A04	AX-147219057	AX-147219057_A04	128.184	Arahy.04	3050291		b	-	b	a	-	a	b	a	b	b	b	a	b	a	a	a	b	b	a	a	a	a	a	a	b	b	b	b	a	b	b	b	-	a	b	a	b	b	b	a	b	b	a
A04	AX-147219011	AX-147219011_A04	133.257	Arahy.04	2660541		b	a	b	a	h	a	b	a	b	a	b	a	a	a	a	a	b	b	a	a	a	a	a	a	b	b	b	b	a	b	b	b	a	a	b	a	b	b	b	b	b	b	a
A04	AX-147246654	AX-147246654_A04	133.366	Arahy.04	2473748		b	a	b	a	h	a	b	a	b	a	b	a	a	a	a	a	b	b	a	a	a	a	a	a	b	b	b	b	a	b	b	b	a	a	b	a	b	b	b	b	b	b	a
A04	AX-176802254	AX-176802254_A04	133.583	Arahy.04	2438113		b	a	b	a	h	a	b	a	b	a	b	a	a	a	a	a	b	b	a	a	a	a	a	a	b	b	b	b	a	b	b	b	a	a	b	a	b	b	b	b	b	b	a
A04	AX-176810671	AX-176810671_A04	141.554	Arahy.04	2118873		b	a	b	a	h	a	b	a	b	a	a	a	a	a	a	a	b	b	a	b	a	b	a	a	a	b	b	b	a	b	b	b	a	a	b	a	b	b	b	b	a	a	a
A04	AX-176799180	AX-176799180_A04	141.662	Arahy.04	2097892		b	a	b	a	h	a	b	a	b	a	a	a	a	a	a	a	b	b	a	b	a	b	a	a	a	b	b	b	a	b	b	b	a	a	b	a	b	b	b	b	a	a	a
A04	AX-176795878	AX-176795878_A04	143.128	Arahy.04	1841636		b	a	b	a	h	a	b	a	b	a	a	a	a	b	a	a	b	b	a	b	a	b	a	a	a	b	b	b	a	b	b	b	a	a	b	a	b	b	b	b	a	a	a
A04	AX-176819509	AX-176819509_A04	147.377	Arahy.04	1645262		b	a	b	a	h	a	b	a	b	a	a	a	a	b	a	a	b	b	a	b	a	b	a	a	a	b	b	b	a	b	b	b	a	a	b	a	b	b	b	a	a	a	a
A04	AX-176803608	AX-176803608_A04	150.694	Arahy.04	1514740		b	a	b	a	h	a	b	a	b	a	a	a	a	b	a	a	b	b	a	b	a	b	a	a	a	b	b	b	a	b	b	b	a	a	a	a	b	b	b	a	a	a	a
A04	AX-176805840	AX-176805840_A04	153.161	Arahy.04	1430835		b	a	b	a	-	a	b	a	b	a	a	-	a	-	a	a	b	b	a	b	a	-	a	a	a	b	-	b	a	b	b	b	a	a	b	a	b	b	b	a	a	a	a
A04	AX-176806651	AX-176806651_A04	159.642	Arahy.04	1001503		a	b	a	b	b	a	b	h	b	a	a	a	a	b	a	a	b	b	a	b	a	b	a	a	b	b	b	b	a	b	b	b	a	a	b	a	b	b	a	a	a	a	a
A04	AX-147246426	AX-147246426_B04	167.377	Arahy.04	826411		b	b	a	b	b	a	a	a	b	a	a	a	a	b	a	b	b	b	h	b	a	b	b	a	b	b	b	b	a	a	b	b	a	a	b	a	b	b	a	a	a	a	a
A05	AX-176809198	AX-176809198_A05	0	Arahy.05	103400940		h	b	b	b	b	h	a	b	b	a	h	a	b	b	b	b	a	b	b	a	a	b	a	a	b	a	a	b	b	b	b	a	b	a	h	a	b	a	b	b	a	h	a
A05	AX-176821020	AX-176821020_A05	3.906	Arahy.05	105150684		h	b	b	b	b	h	a	b	b	a	h	a	b	b	b	b	a	b	b	a	a	a	a	b	b	a	a	a	a	b	b	a	b	a	h	a	b	a	b	b	b	a	a
A05	AX-176822447	AX-176822447_A05	5.725	Arahy.05	106023070		h	b	b	b	b	a	a	b	b	b	h	a	b	b	b	b	h	a	b	a	a	a	a	b	a	a	b	a	a	b	b	a	b	a	h	a	b	a	b	b	b	a	a
A05	AX-176803816	AX-176803816_A05	5.835	Arahy.05	106217002		b	b	b	b	b	a	a	b	b	b	h	a	b	b	b	b	h	a	b	a	a	a	a	b	a	a	b	a	a	b	b	a	b	a	h	a	b	a	b	b	b	a	a
A05	AX-176796238	AX-176796238_A05	16.235	Arahy.05	110033877		b	a	b	b	b	h	a	b	b	b	b	a	b	b	b	a	h	a	b	a	a	a	b	b	b	a	b	a	a	b	b	a	a	a	h	b	b	a	b	b	b	a	a
A05	AX-176794905	AX-176794905_A05	16.349	Arahy.05	109817928		b	a	b	b	b	h	a	b	b	b	b	a	b	b	b	a	h	a	b	a	a	a	b	b	b	a	b	a	a	b	b	a	a	a	h	b	b	a	b	b	b	a	a
A05	AX-176823395	AX-176823395_A05	16.898	Arahy.05	110343608		b	a	b	b	b	h	a	b	b	b	b	a	b	b	b	a	h	a	b	a	a	a	b	b	b	a	b	a	a	b	b	a	a	a	h	b	b	a	b	b	b	a	a
A05	AX-176809414	AX-176809414_A05	17.115	Arahy.05	110396930		b	a	b	b	b	h	a	b	b	b	b	a	b	b	b	a	h	a	b	a	a	a	b	b	b	a	b	a	a	b	b	a	a	a	h	b	b	a	b	b	b	a	a
A05	AX-176804724	AX-176804724_A05	18.659	Arahy.05	110448671		b	a	b	b	b	h	a	b	b	b	b	h	b	b	b	h	b	a	b	a	-	a	b	b	b	a	b	a	a	b	b	a	a	a	h	b	b	a	b	b	b	a	a
A05	AX-176792431	AX-176792431_A05	19.601	Arahy.05	110813834		b	a	b	b	b	h	a	b	b	b	b	a	b	b	b	a	b	a	b	a	a	a	b	b	b	a	b	a	a	b	b	a	a	a	h	b	b	a	b	b	b	a	a
A05	AX-176807641	AX-176807641_A05	19.601	Arahy.05	110813904		b	a	b	b	b	h	a	b	b	b	b	a	b	b	b	a	b	a	b	a	a	a	b	b	b	a	b	a	a	b	b	a	a	a	h	b	b	a	b	b	b	a	a
A05	AX-176803805	AX-176803805_A05	19.601	Arahy.05	110711175		b	a	b	b	b	h	a	b	b	b	b	a	b	b	b	a	b	a	b	a	a	a	b	b	b	a	b	a	a	b	b	a	a	a	h	b	b	a	b	b	b	a	a
A05	AX-176812463	AX-176812463_A05	19.601	Arahy.05	110810597		b	a	b	b	b	h	a	b	b	b	b	a	b	b	b	a	b	a	b	a	a	a	b	b	b	a	b	a	a	b	b	a	a	a	h	b	b	a	b	b	b	a	a
A05	AX-176822741	AX-176822741_A05	20.489	Arahy.05	110914232		b	a	b	a	b	h	a	b	b	b	b	a	b	b	b	a	b	a	b	a	a	a	b	b	b	a	b	a	a	b	b	a	a	a	h	b	b	a	b	b	b	a	a
A05	AX-147223758	AX-147223758_A05	21.038	Arahy.05	111532253		b	a	b	a	b	h	a	b	b	b	b	a	b	b	b	a	b	a	b	a	a	a	b	b	b	a	b	a	a	b	b	a	a	a	h	b	b	a	b	b	b	a	a
A05	AX-176807506	AX-176807506_A05	22.63	Arahy.05	112152689		b	a	b	a	b	a	a	b	b	b	b	a	b	b	b	a	b	a	b	a	a	a	b	b	b	a	b	a	a	a	b	a	a	a	h	b	b	a	b	b	b	a	a
A05	AX-176810022	AX-176810022_A05	24.077	Arahy.05	111936057		b	a	b	a	b	h	a	b	b	b	b	-	b	b	b	h	b	a	b	a	-	a	b	b	b	a	b	a	a	a	b	a	a	a	h	b	b	a	b	b	b	a	a
A05	AX-176812605	AX-176812605_A05	29.012	Arahy.05	112730021		b	-	b	a	b	h	a	b	b	b	b	-	b	b	b	-	b	b	b	a	a	a	b	a	b	a	b	a	a	h	b	-	a	a	-	b	b	h	b	b	b	a	a
A05	AX-176802416	AX-176802416_A05	49.536	Arahy.05	115729292		b	a	b	a	b	b	a	b	b	a	b	a	b	a	a	b	b	b	h	a	a	a	b	a	b	a	a	b	b	a	b	b	a	a	b	b	a	a	b	a	b	a	a
A05	AX-176810858	AX-176810858_A05	49.536	Arahy.05	115783394		b	a	b	a	b	b	a	b	b	a	b	a	b	a	a	b	b	b	h	a	a	a	b	a	b	a	a	b	b	a	b	b	a	a	b	b	a	a	b	a	b	a	a
A05	AX-176809615	AX-176809615_A05	49.644	Arahy.05	115818259		b	a	b	a	b	b	a	b	b	a	b	a	b	a	a	b	b	b	h	a	a	a	b	a	b	a	a	b	b	a	b	b	a	a	b	b	a	a	b	a	b	a	a
A06	AX-176799110	AX-176799110_A06	0	Arahy.06	116435873		a	a	h	h	b	-	a	-	-	a	a	-	b	a	a	b	b	h	a	a	a	-	a	h	a	-	a	b	b	-	b	b	a	-	b	b	b	h	-	h	b	b	-
A06	AX-176815195	AX-176815195_B06	7.391	Arahy.06	149369709		a	a	h	b	b	a	a	a	a	a	a	a	a	a	a	a	b	b	a	a	a	h	a	a	a	a	a	b	b	a	b	b	a	b	b	b	b	b	b	a	b	b	b
A06	AX-147226725	AX-147226725_B06	7.941	Arahy.06	149225781		a	a	h	b	b	a	a	a	a	a	a	a	a	a	a	a	b	b	a	a	a	h	a	a	a	a	a	b	b	a	b	b	a	b	b	b	b	b	b	a	b	b	b
A06	AX-147226730	AX-147226730_B06	7.941	Arahy.06	149263997		a	a	-	b	b	a	a	a	a	a	a	a	a	a	a	a	b	b	a	a	a	h	a	a	a	a	a	b	b	a	b	b	a	b	b	b	b	b	b	a	b	b	b
A06	AX-147226729	AX-147226729_B06	8.074	Arahy.06	149263946		a	a	h	b	b	a	a	a	a	a	a	a	a	a	a	a	b	b	a	a	a	-	a	a	a	a	a	b	b	a	b	b	a	b	b	b	b	b	b	a	b	b	b
A06	AX-176811634	AX-176811634_B06	9.049	Arahy.06	149435510		a	a	a	b	b	a	a	a	a	a	a	a	a	a	a	a	b	b	a	a	a	a	a	a	a	a	a	b	b	a	b	b	a	b	b	b	b	b	b	a	b	b	b
A06	AX-176793524	AX-176793524_B06	10.517	Arahy.06	149203824		a	a	h	b	b	a	-	a	a	a	a	a	-	a	a	a	b	b	a	a	a	h	a	a	-	-	a	b	b	a	b	b	a	b	b	b	b	b	b	-	b	b	b
A06	AX-176822120	AX-176822120_A06	13.669	Arahy.06	116118681		a	a	h	b	b	a	a	a	a	a	a	a	b	a	a	b	b	b	a	a	a	b	a	a	a	a	a	b	b	b	b	b	a	b	b	b	b	b	b	a	b	b	b
A06	AX-147254204	AX-147254204_A06	14.607	Arahy.06	116397335		a	a	h	b	b	a	a	a	a	a	a	a	b	a	a	b	b	b	a	a	a	h	a	a	a	a	a	b	b	b	b	b	a	b	b	b	b	b	b	a	b	b	b
A06	AX-176823122	AX-176823122_A06	16.788	Arahy.06	115578457		b	a	b	b	b	a	a	a	a	a	a	a	b	a	a	b	b	b	a	a	a	b	a	a	a	a	a	b	b	b	b	b	a	b	b	b	b	b	b	a	b	b	b
A06	AX-176792054	AX-176792054_A06	20.363	Arahy.06	114928953		b	a	b	b	a	a	a	b	a	a	a	a	b	a	a	b	b	b	a	a	a	b	a	a	a	a	a	b	b	b	b	b	a	b	b	b	b	b	b	b	b	b	b
A06	AX-147226568	AX-147226568_B06	20.801	Arahy.06	147287528		b	a	b	b	a	a	a	b	a	a	b	a	b	a	a	b	b	b	a	a	a	b	a	a	a	a	a	b	b	b	b	b	a	b	b	b	b	b	b	b	b	b	b
A06	AX-176795473	AX-176795473_A06	20.801	Arahy.06	114551121		b	a	b	b	a	a	a	b	a	a	b	a	b	a	a	b	b	b	a	a	a	b	a	a	a	a	a	b	b	b	b	b	a	b	b	b	b	b	b	b	b	b	b
A06	AX-176809709	AX-176809709_A06	22.031	Arahy.06	113797179		b	a	b	b	a	a	a	b	a	a	b	a	b	a	a	b	b	b	a	a	a	b	a	a	b	a	a	b	b	b	b	b	a	b	h	b	b	b	b	b	b	b	b
A06	AX-176808055	AX-176808055_A06	24.769	Arahy.06	113327476		b	a	b	b	a	a	a	b	a	a	b	a	b	a	a	b	b	b	a	a	a	b	a	a	b	a	a	b	b	b	h	b	a	b	h	b	b	b	b	b	b	b	b
A06	AX-176818291	AX-176818291_A06	25.27	Arahy.06	113481648		b	a	b	b	a	a	a	b	a	a	b	a	b	a	a	b	b	b	a	a	a	b	a	a	b	a	a	b	b	b	b	b	a	b	h	b	b	b	b	b	b	b	b
A06	AX-147253932	AX-147253932_A06	27.823	Arahy.06	112312129		b	a	b	b	a	a	a	b	a	a	b	a	b	a	a	b	b	b	h	a	a	b	a	a	b	a	a	b	b	b	b	b	a	b	h	b	b	b	b	b	b	b	a
A06	AX-147253930	AX-147253930_B06	28.373	Arahy.06	145369382		b	a	b	b	a	a	a	b	b	a	b	a	b	a	a	b	b	b	h	a	a	b	a	a	b	a	a	b	-	b	b	b	a	b	-	b	b	b	b	h	b	b	a
A06	AX-147253920	AX-147253920_A06	29.722	Arahy.06	112014950		b	a	b	b	a	a	a	b	b	a	b	a	b	a	a	a	b	b	h	a	a	b	h	a	b	a	a	b	b	b	b	b	a	b	h	b	b	b	b	h	b	b	a
A06	AX-147253923	AX-147253923_B06	29.722	Arahy.06	145027780		b	a	b	b	a	a	a	b	b	a	b	a	b	a	a	a	b	b	h	a	a	b	h	a	b	a	a	-	b	b	b	b	a	b	h	b	b	b	b	-	b	b	a
A06	AX-147253922	AX-147253922_A06	29.94	Arahy.06	112018963		b	a	b	b	a	a	a	b	b	a	b	a	b	a	a	a	b	b	h	a	a	b	h	a	b	a	a	b	b	b	b	b	a	b	h	b	b	b	b	-	b	b	a
A06	AX-147253921	AX-147253921_A06	30.048	Arahy.06	112016859		b	a	b	b	a	a	a	b	b	a	b	a	b	a	a	a	b	b	h	a	a	b	h	a	b	a	a	b	b	b	b	b	a	b	h	b	b	b	b	h	b	b	a
A06	AX-147226387	AX-147226387_A06	30.052	Arahy.06	112018652		b	a	b	b	a	a	a	b	b	a	b	a	b	a	a	a	b	b	h	a	a	b	h	a	b	a	a	-	b	b	b	b	a	b	h	b	-	b	b	h	b	b	a
A06	AX-176808942	AX-176808942_A06	31.048	Arahy.06	111591360		b	a	b	b	a	a	a	b	b	a	b	a	-	a	a	a	b	b	h	a	a	b	h	a	b	a	a	b	b	b	b	b	a	b	h	b	b	b	b	h	b	b	a
A06	AX-147226344	AX-147226344_A06	32.048	Arahy.06	111514681		b	a	b	b	a	a	a	b	b	a	b	a	b	a	a	a	b	b	h	a	a	b	h	a	b	a	a	b	b	b	b	b	a	b	-	b	b	b	b	h	b	b	a
A06	AX-176806627	AX-176806627_A06	32.597	Arahy.06	111098529		b	a	b	b	a	a	a	b	b	a	b	a	b	a	a	a	b	b	h	a	a	b	h	a	b	a	a	b	b	b	b	b	a	b	h	b	b	b	b	h	b	b	a
A06	AX-176817778	AX-176817778_A06	34.178	Arahy.06	110483512		b	a	b	b	a	a	a	b	b	a	b	a	b	a	a	a	b	b	a	a	a	b	h	a	b	b	a	b	b	b	b	b	a	b	h	b	b	b	b	h	b	b	a
A06	AX-147253814	AX-147253814_B06	35.997	Arahy.06	143495194		b	a	b	b	a	a	a	b	b	a	b	a	b	a	a	a	b	b	a	a	a	b	a	a	b	b	a	b	b	b	b	b	a	b	a	b	a	b	b	a	b	b	a
A06	AX-147226199	AX-147226199_A06	41.72	Arahy.06	108648313		b	a	b	b	a	a	a	b	h	a	b	a	b	h	a	a	b	b	h	a	a	b	a	a	b	b	a	b	b	b	a	b	a	b	a	h	a	a	b	h	b	b	a
A06	AX-176808527	AX-176808527_A06	54.254	Arahy.06	101882777		b	a	b	b	a	a	a	a	a	a	b	h	b	h	a	a	b	h	h	b	a	b	b	a	b	b	a	b	b	b	a	b	a	a	b	h	a	h	b	b	b	b	a
A06	AX-176812164	AX-176812164_A06	55.883	Arahy.06	100798729		b	a	b	b	a	a	a	a	a	a	b	h	b	h	a	a	b	h	h	a	a	h	b	a	b	b	a	b	b	b	a	b	a	a	b	h	a	h	b	b	b	b	a
A06	AX-176815136	AX-176815136_A06	55.883	Arahy.06	101164798		b	a	b	b	a	a	a	a	a	a	b	h	b	h	a	a	b	h	h	a	a	h	b	a	b	b	a	b	b	b	a	b	a	a	b	h	a	h	b	b	b	b	a
A06	AX-176817741	AX-176817741_A06	56.432	Arahy.06	101486901		b	a	b	b	a	a	a	a	a	a	b	h	b	h	a	a	b	h	h	a	a	h	b	a	b	b	a	b	b	b	a	b	a	a	b	h	a	h	b	b	b	b	a
A06	AX-176819526	AX-176819526_A06	56.54	Arahy.06	101602585		b	a	b	b	a	a	a	a	a	a	b	h	b	h	a	a	b	h	h	a	a	h	b	a	b	b	a	b	b	b	a	b	a	a	b	h	a	h	b	b	b	b	a
A06	AX-176797354	AX-176797354_A06	56.54	Arahy.06	101602515		b	a	b	b	a	a	a	a	a	a	b	h	b	h	a	a	b	h	h	a	a	h	b	a	b	b	a	b	b	b	a	b	a	a	b	h	a	h	b	b	b	b	a
A06	AX-147225896	AX-147225896_A06	57.592	Arahy.06	101623278		b	h	b	b	a	a	a	-	-	-	b	h	b	h	-	a	b	h	h	-	a	-	b	a	b	b	-	b	b	b	a	b	a	a	b	h	a	h	b	b	b	b	a
A06	AX-176813749	AX-176813749_A06	59.499	Arahy.06	99425056		b	a	b	b	-	a	a	a	a	a	b	-	b	h	-	a	b	h	h	-	a	-	b	a	b	b	a	b	b	b	h	b	a	a	b	-	a	a	b	b	b	b	a
A06	AX-176798659	AX-176798659_A06	60.743	Arahy.06	99690352		b	a	b	-	a	a	h	-	a	a	b	h	b	h	a	a	b	h	h	a	a	h	b	a	b	b	a	b	b	b	a	b	a	a	b	h	a	h	-	b	b	b	a
A06	AX-176803350	AX-176803350_A06	62.065	Arahy.06	99585818		b	a	b	b	a	a	a	a	-	a	b	-	b	b	a	a	b	b	h	a	a	h	b	a	b	b	a	b	b	b	a	b	a	a	b	-	a	h	b	b	b	b	a
A06	AX-176796367	AX-176796367_A06	63.017	Arahy.06	99236917		b	a	b	b	a	a	a	a	a	a	b	h	b	h	a	a	b	h	h	a	a	h	b	a	b	b	a	b	b	b	a	b	a	a	b	h	a	h	b	b	b	b	a
A06	AX-147225870	AX-147225870_A06	63.235	Arahy.06	99364156		b	a	b	b	a	a	a	a	a	a	b	h	b	h	a	a	b	h	h	a	a	h	b	a	b	b	a	b	b	b	a	b	a	a	b	h	a	h	b	b	b	b	a
A06	AX-176812797	AX-176812797_A06	63.235	Arahy.06	100210275		b	a	b	b	a	a	a	a	a	a	b	h	b	h	a	a	b	h	h	a	a	h	b	a	b	b	a	b	b	b	a	b	a	a	b	h	a	h	b	b	b	b	a
A06	AX-176815483	AX-176815483_A06	63.235	Arahy.06	99514000		b	a	b	b	a	a	a	a	a	a	b	h	b	h	a	a	b	h	h	a	a	h	b	a	b	b	a	b	b	b	a	b	a	a	b	h	a	h	b	b	b	b	a
A06	AX-176815132	AX-176815132_A06	63.235	Arahy.06	99590021		b	a	b	b	a	a	a	a	a	a	b	h	b	h	a	a	b	h	h	a	a	h	b	a	b	b	a	b	b	b	a	b	a	a	b	h	a	h	b	b	b	b	a
A06	AX-176817731	AX-176817731_A06	63.343	Arahy.06	99298446		b	a	b	b	a	a	a	a	a	a	b	h	b	h	a	a	b	h	h	a	a	h	b	a	b	b	a	b	b	b	a	b	a	a	b	h	a	h	b	b	b	b	a
A06	AX-176800771	AX-176800771_A06	64.116	Arahy.06	99202954		b	a	b	b	a	a	a	a	a	a	b	h	b	-	a	a	b	-	h	a	a	h	b	a	b	b	a	b	b	b	a	b	a	a	b	h	a	h	b	b	b	b	a
A06	AX-176806463	AX-176806463_A06	64.333	Arahy.06	98966637		b	a	b	b	a	a	a	a	a	a	b	h	b	h	a	a	b	h	h	a	a	h	b	a	b	b	a	b	b	b	a	b	a	a	b	h	a	h	b	b	b	b	a
A06	AX-176818488	AX-176818488_A06	64.334	Arahy.06	98747868		b	a	b	b	a	a	a	a	a	a	b	h	b	h	a	a	b	h	h	a	a	h	b	a	b	b	a	b	b	b	a	b	a	a	b	h	a	h	b	b	b	b	a
A06	AX-176801491	AX-176801491_A06	64.661	Arahy.06	98574305		b	a	b	b	a	a	a	a	a	a	b	h	b	h	a	a	b	h	b	a	a	h	b	a	b	b	a	b	b	b	a	b	a	a	b	h	a	-	b	b	b	b	a
A06	AX-176815164	AX-176815164_A06	64.818	Arahy.06	98777181		b	a	b	b	a	a	a	a	a	a	b	h	b	h	a	a	b	h	-	a	a	h	b	a	b	b	a	b	b	b	a	b	a	a	b	h	a	h	b	b	b	b	a
A06	AX-176793581	AX-176793581_A06	64.987	Arahy.06	98613587		b	a	b	b	a	a	a	a	a	a	b	h	b	h	a	a	b	h	b	a	a	h	b	a	b	b	a	b	b	b	a	b	a	a	b	h	a	h	b	b	b	b	a
A06	AX-176797506	AX-176797506_A06	65.205	Arahy.06	98408758		b	a	b	b	a	a	a	a	a	a	b	h	b	h	a	a	b	h	b	a	a	h	b	a	b	b	a	b	b	b	a	b	a	a	b	h	a	h	b	b	b	b	a
A06	AX-147225829	AX-147225829_A06	65.532	Arahy.06	98229114		b	a	b	b	a	a	a	a	a	a	b	h	b	h	a	a	b	h	b	a	a	h	b	a	b	b	a	b	b	b	a	b	a	a	b	h	a	h	b	b	b	b	a
A06	AX-176804027	AX-176804027_A06	65.532	Arahy.06	98166057		b	a	b	b	a	a	a	a	a	a	b	h	b	h	a	a	b	h	b	a	a	h	b	a	b	b	a	b	b	b	a	b	a	a	b	h	a	h	b	b	b	b	a
A06	AX-147225817	AX-147225817_A06	66.275	Arahy.06	97281032		b	a	b	b	a	a	a	a	a	a	b	h	b	h	a	a	b	h	b	a	-	h	b	a	b	b	a	b	b	b	a	b	a	a	b	h	a	h	b	b	b	b	a
A06	AX-176810639	AX-176810639_A06	66.412	Arahy.06	96024870		b	a	b	b	a	a	a	a	a	a	b	h	b	h	a	a	b	h	b	a	a	h	b	a	b	b	a	b	b	b	a	b	a	a	b	h	a	h	b	b	b	b	a
A06	AX-176815710	AX-176815710_A06	66.928	Arahy.06	97366699		b	a	b	b	a	a	-	a	a	a	b	h	b	-	a	a	b	h	b	-	a	h	b	a	b	b	a	b	b	b	-	b	-	a	b	-	a	h	b	b	b	b	a
A06	AX-147225804	AX-147225804_A06	67.179	Arahy.06	96512819		b	a	b	b	a	a	a	a	a	a	b	h	b	h	a	a	b	h	b	a	a	h	b	a	b	b	a	b	b	b	a	b	a	a	b	h	a	h	b	b	b	b	a
A06	AX-147225826	AX-147225826_A06	67.443	Arahy.06	98070824		b	a	b	b	a	a	a	a	a	a	b	h	b	h	a	a	b	h	b	a	a	h	b	a	b	b	a	b	b	b	a	b	a	a	b	h	a	h	b	b	b	b	a
A06	AX-176815120	AX-176815120_A06	67.835	Arahy.06	97955832		b	a	b	b	a	a	a	a	a	a	b	h	b	h	a	a	b	h	b	a	a	h	b	a	b	-	a	b	b	b	a	b	a	a	b	h	a	h	b	b	b	b	a
A06	AX-176811917	AX-176811917_A06	67.943	Arahy.06	97553398		b	a	b	b	a	a	a	a	a	a	b	h	b	h	a	a	b	h	b	a	a	h	b	a	b	b	a	b	b	b	a	b	a	a	b	h	a	h	b	b	b	b	a
A06	AX-176807265	AX-176807265_A06	68.052	Arahy.06	97747283		b	-	b	b	a	a	a	a	a	a	b	h	b	h	a	a	b	h	b	a	a	h	b	a	b	b	a	b	b	b	a	b	a	a	b	h	-	h	b	b	b	b	a
A06	AX-176802651	AX-176802651_A06	68.269	Arahy.06	96089093		b	a	b	b	a	a	a	a	a	a	b	h	b	h	a	a	b	h	b	a	a	h	b	a	b	b	a	b	b	b	a	b	a	a	b	h	a	h	b	b	b	b	a
A06	AX-176817478	AX-176817478_A06	68.377	Arahy.06	97268187		b	a	b	b	a	a	a	a	a	a	b	h	b	h	a	a	b	h	b	a	a	h	b	a	b	b	a	b	b	b	a	b	a	a	b	h	a	h	b	b	b	b	a
A06	AX-176805538	AX-176805538_A06	68.377	Arahy.06	95859605		b	a	b	b	a	a	a	a	a	a	b	h	b	h	a	a	b	h	b	a	a	h	b	a	b	b	a	b	b	b	a	b	a	a	b	h	a	h	b	b	b	b	a
A06	AX-176810806	AX-176810806_A06	68.486	Arahy.06	95323952		b	a	b	b	a	a	a	a	a	a	b	h	b	h	a	a	b	h	b	a	a	h	b	a	b	b	a	b	b	b	a	b	a	a	b	h	a	h	b	b	b	b	a
A06	AX-176811014	AX-176811014_A06	68.703	Arahy.06	97423685		b	a	b	b	a	a	a	a	a	a	b	h	b	h	a	a	b	h	b	a	a	h	b	a	b	b	a	b	b	b	a	b	a	a	b	h	a	h	b	b	b	b	a
A06	AX-176819874	AX-176819874_A06	69.453	Arahy.06	94461654		b	a	b	b	a	a	a	a	a	a	b	h	b	h	a	a	b	a	b	a	a	h	b	a	b	b	a	b	b	-	-	b	a	a	b	-	a	h	b	b	b	b	a
A06	AX-176802703	AX-176802703_A06	69.695	Arahy.06	94461723		b	a	b	b	a	a	a	a	a	a	b	h	b	h	a	a	b	h	b	a	a	h	b	a	b	b	a	b	b	b	a	b	a	a	b	h	a	h	b	b	b	b	a
A06	AX-176817716	AX-176817716_A06	69.913	Arahy.06	94507764		b	a	b	b	a	a	a	a	a	a	b	h	b	h	a	a	b	h	b	a	a	h	b	a	b	b	a	b	b	b	a	b	a	a	b	h	a	h	b	b	b	b	a
A06	AX-176799118	AX-176799118_A06	70.573	Arahy.06	94134706		b	a	b	b	a	-	a	a	a	a	b	a	b	-	a	a	b	h	b	-	a	h	b	-	b	b	-	b	b	b	a	b	a	a	b	h	a	h	b	b	b	b	a
A06	AX-176809505	AX-176809505_A06	71.304	Arahy.06	94018062		b	a	b	b	-	-	a	a	h	a	b	h	b	h	a	a	b	h	b	-	a	h	b	a	b	b	a	b	b	b	a	b	a	a	b	h	a	h	b	b	b	b	-
A06	AX-176813261	AX-176813261_A06	72.945	Arahy.06	94332763		b	a	b	b	-	a	a	-	h	a	b	-	b	h	a	h	b	-	b	a	h	b	b	a	b	b	a	b	b	b	a	b	a	a	b	h	a	h	b	b	b	b	a
A06	AX-176815106	AX-176815106_A06	74.538	Arahy.06	94332973		b	a	b	b	a	a	a	a	a	a	b	h	b	h	a	a	b	h	b	a	a	h	b	a	b	b	a	b	b	b	a	b	a	a	b	h	a	h	b	b	b	b	a
A06	AX-176817710	AX-176817710_A06	74.538	Arahy.06	94181066		b	a	b	b	a	a	a	a	a	a	-	h	b	h	a	a	b	h	b	a	a	h	b	a	b	b	a	b	-	b	-	b	a	a	b	h	a	h	b	b	b	b	a
A06	AX-176817705	AX-176817705_A06	74.865	Arahy.06	93391062		b	a	b	h	a	a	a	a	a	a	b	h	b	h	a	a	b	h	b	a	a	h	b	a	b	b	a	b	b	b	a	b	a	a	b	h	a	h	b	b	b	b	a
A06	AX-176812650	AX-176812650_A06	75.082	Arahy.06	93907118		b	a	b	h	a	a	a	a	a	a	b	h	b	h	a	a	-	h	-	a	a	h	b	a	b	b	a	b	b	b	a	b	a	a	b	h	a	h	b	b	b	b	a
A06	AX-147225784	AX-147225784_A06	75.3	Arahy.06	94004745		b	a	b	h	a	a	a	a	a	a	b	h	b	h	a	a	b	h	b	a	a	h	b	a	b	b	a	b	b	b	a	b	a	a	b	h	a	h	b	b	b	b	a
A06	AX-176817704	AX-176817704_A06	75.408	Arahy.06	93364520		b	a	b	h	a	a	a	a	a	a	-	h	b	h	a	a	b	h	b	a	a	h	b	a	b	b	a	b	b	b	a	b	a	a	b	h	a	h	b	b	b	b	a
A06	AX-176813510	AX-176813510_A06	75.626	Arahy.06	93018617		b	a	b	h	a	a	a	a	a	a	b	h	b	h	a	a	b	h	b	a	a	h	b	a	b	b	a	b	b	b	a	b	a	a	b	h	a	h	b	b	b	b	a
A06	AX-176813525	AX-176813525_A06	75.953	Arahy.06	91322653		b	a	b	h	a	a	a	a	a	a	b	h	b	h	a	a	b	h	b	a	a	h	b	a	b	b	a	b	b	b	a	b	a	a	b	h	a	h	b	b	b	b	a
A06	AX-176817586	AX-176817586_A06	76.17	Arahy.06	91544795		b	a	b	h	a	a	a	a	a	a	b	h	b	h	a	a	b	h	b	a	a	h	b	a	b	b	a	b	b	-	a	b	a	a	b	h	a	h	b	b	b	b	a
A06	AX-147225714	AX-147225714_A06	76.279	Arahy.06	90754023		b	a	b	h	a	a	a	a	a	a	b	h	b	h	a	a	b	h	b	a	a	h	b	a	b	b	a	b	b	b	a	b	a	a	b	h	a	h	b	b	b	b	a
A06	AX-176811871	AX-176811871_A06	76.387	Arahy.06	90831746		b	a	b	h	a	a	a	a	a	a	b	h	b	h	a	a	b	h	b	a	a	h	b	a	b	b	a	b	b	b	a	b	a	a	b	h	a	h	b	b	b	b	a
A06	AX-176802562	AX-176802562_A06	76.387	Arahy.06	92021373		b	-	b	h	a	a	a	a	a	a	b	h	b	h	a	a	b	h	b	a	a	h	b	a	b	b	a	b	b	b	a	b	a	a	b	h	a	h	b	b	b	b	a
A06	AX-176817688	AX-176817688_A06	76.387	Arahy.06	92125919		b	a	b	h	a	a	a	a	a	a	b	h	b	h	a	a	b	h	b	a	a	h	b	a	b	b	a	b	b	b	-	b	a	a	b	h	a	h	b	b	b	b	a
A06	AX-176797086	AX-176797086_A06	76.495	Arahy.06	93321811		b	a	b	h	a	a	a	a	a	a	b	h	b	h	a	a	b	h	b	a	a	h	b	a	b	b	a	b	b	b	a	b	a	a	b	h	a	h	b	b	b	b	a
A06	AX-176815094	AX-176815094_A06	76.628	Arahy.06	92164357		b	a	b	h	a	a	a	a	a	a	b	h	b	h	-	a	b	h	b	a	a	h	b	a	b	b	a	b	b	b	a	b	a	a	b	h	a	h	b	b	b	b	a
A06	AX-176803523	AX-176803523_A06	77.151	Arahy.06	90518291		b	a	b	h	a	a	a	a	a	a	b	h	b	h	a	a	b	a	b	a	a	h	b	a	b	b	a	b	b	b	a	b	a	a	b	h	a	-	b	b	a	b	a
A06	AX-176800314	AX-176800314_A06	77.152	Arahy.06	90430649		b	a	b	h	a	a	a	a	a	a	b	h	b	h	a	a	b	a	b	a	a	h	b	a	b	b	a	b	b	b	a	b	a	a	b	h	a	h	b	b	a	b	a
A06	AX-176802665	AX-176802665_A06	77.152	Arahy.06	89837896		b	a	b	h	a	a	a	a	a	a	b	h	b	-	a	a	b	a	b	a	a	h	b	a	b	b	a	b	b	b	a	b	a	a	b	h	a	h	b	b	a	b	a
A06	AX-176815610	AX-176815610_A06	77.152	Arahy.06	89342267		b	a	b	h	a	a	a	a	a	a	b	h	b	h	a	a	b	a	b	a	a	h	b	a	b	b	a	b	b	b	a	b	a	a	b	h	a	h	b	b	a	b	a
A06	AX-176801879	AX-176801879_A06	77.26	Arahy.06	90335633		b	a	b	h	a	a	a	a	a	a	b	h	b	h	a	a	b	a	b	a	a	h	b	a	b	b	a	b	b	b	a	b	a	a	b	h	a	h	b	b	a	b	a
A06	AX-176806962	AX-176806962_A06	77.369	Arahy.06	88793280		b	a	b	h	a	a	a	a	a	a	b	h	b	h	a	a	b	a	b	a	a	h	b	a	b	b	a	b	b	b	a	b	a	a	b	h	a	h	b	b	a	b	a
A06	AX-176800055	AX-176800055_A06	77.498	Arahy.06	89756323		b	-	b	-	a	-	a	a	a	a	b	h	b	h	a	a	b	a	b	a	a	h	b	a	b	b	a	b	b	b	a	b	a	a	b	h	a	-	b	b	a	b	a
A06	AX-176794543	AX-176794543_A06	78.063	Arahy.06	90336087		b	h	b	h	a	a	a	a	a	a	b	-	b	h	a	a	b	a	b	-	a	h	b	a	b	b	a	b	b	b	a	b	a	a	b	h	a	h	b	b	a	b	a
A06	AX-176817686	AX-176817686_A06	79.656	Arahy.06	91246989		b	a	b	a	a	a	a	a	a	a	b	a	-	-	a	a	b	h	b	a	a	a	b	a	b	b	a	b	b	-	a	b	a	a	b	a	a	-	b	b	b	b	a
A06	AX-176795496	AX-176795496_A06	80.52	Arahy.06	90831865		b	a	b	h	a	a	a	a	a	a	b	h	b	h	a	a	b	h	b	a	a	h	b	a	b	b	a	b	b	b	a	b	a	a	b	h	a	h	b	b	b	b	a
A06	AX-176813608	AX-176813608_A06	80.738	Arahy.06	91273302		b	a	b	h	a	a	a	a	a	a	b	h	b	h	a	a	b	h	b	a	a	h	b	a	b	b	a	b	b	b	a	b	a	a	b	h	a	h	b	b	b	b	a
A06	AX-176817672	AX-176817672_A06	81.456	Arahy.06	88945494		b	a	b	h	a	a	a	a	a	a	b	h	b	h	a	a	b	a	b	a	a	h	b	a	b	b	a	b	b	b	a	b	a	a	b	h	a	h	b	b	a	b	a
A06	AX-176809979	AX-176809979_A06	82.173	Arahy.06	85151144		b	a	b	h	a	a	a	a	a	a	b	h	b	h	a	a	b	a	b	a	a	h	b	a	b	b	a	b	b	b	a	b	a	a	b	h	a	h	b	b	a	b	a
A06	AX-176796248	AX-176796248_A06	82.471	Arahy.06	85157491		b	a	b	h	a	a	a	a	a	a	b	h	b	h	a	a	b	a	b	a	a	h	b	a	b	b	a	b	b	b	a	b	a	a	b	h	a	h	b	b	a	b	a
A06	AX-176805609	AX-176805609_A06	82.5	Arahy.06	87576787		b	a	b	h	a	a	a	a	a	a	b	h	b	-	a	a	b	a	b	a	a	h	b	a	b	b	a	b	b	b	a	b	a	a	b	h	a	h	b	b	a	b	a
A06	AX-176819856	AX-176819856_A06	82.5	Arahy.06	85170474		b	a	b	h	a	a	a	a	a	a	b	h	b	h	a	a	b	a	b	a	a	h	b	a	b	b	a	b	b	b	a	b	a	a	b	h	a	h	b	b	a	b	a
A06	AX-147253070	AX-147253070_B06	82.5	Arahy.06	116321665		b	a	b	h	a	a	a	a	a	a	b	h	b	h	a	a	b	a	b	a	a	h	b	a	b	b	a	b	b	b	a	b	a	a	b	h	a	h	b	b	a	b	a
A06	AX-176795672	AX-176795672_A06	82.5	Arahy.06	85170544		b	a	b	h	a	a	a	a	a	a	b	h	b	h	a	a	b	a	b	a	a	h	b	a	b	b	a	b	b	b	a	b	a	a	b	h	a	h	b	b	a	b	a
A06	AX-176802926	AX-176802926_A07	82.717	Arahy.06	17170775		b	a	b	h	a	a	a	a	a	a	b	h	b	h	a	a	b	a	b	-	a	h	b	a	b	b	a	b	b	b	a	b	a	a	b	h	a	h	b	b	a	b	-
A06	AX-176794576	AX-176794576_A06	82.717	Arahy.06	88354164		b	a	b	h	a	a	a	a	a	a	b	h	b	h	a	a	b	a	b	a	a	h	b	a	b	b	a	b	b	b	a	b	a	a	b	h	a	h	b	b	a	b	a
A06	AX-176804603	AX-176804603_A06	82.826	Arahy.06	88250443		b	a	b	h	a	a	a	a	a	a	b	h	b	h	a	-	b	a	b	a	a	h	b	a	b	b	a	b	b	b	a	b	a	a	b	h	a	h	b	b	a	b	a
A06	AX-176798556	AX-176798556_A06	82.934	Arahy.06	88516473		b	a	b	h	a	a	a	a	a	a	b	h	b	h	a	a	b	a	b	a	a	h	b	a	b	b	a	b	b	b	a	b	a	a	b	h	a	h	b	b	a	b	a
A06	AX-176818986	AX-176818986_A06	83.152	Arahy.06	85156714		b	a	b	h	a	a	a	a	a	a	b	h	b	h	a	a	b	a	b	a	a	h	b	a	b	b	a	b	b	b	a	b	a	a	b	h	a	h	b	b	a	b	a
A06	AX-176811580	AX-176811580_A06	83.26	Arahy.06	87226412		b	a	b	h	a	a	a	a	a	a	b	h	b	h	a	a	b	a	b	a	a	h	b	a	b	b	a	b	b	b	a	b	a	a	b	b	a	h	b	b	a	b	a
A06	AX-176817662	AX-176817662_A06	83.653	Arahy.06	84536932		b	a	b	h	a	a	a	a	-	a	b	h	b	h	a	-	b	a	b	a	a	h	b	a	b	b	-	b	b	b	a	b	a	a	b	b	a	h	b	b	a	b	a
A06	AX-176821351	AX-176821351_A06	85.424	Arahy.06	85392566		b	a	b	-	a	a	a	a	a	a	-	h	b	-	a	a	b	a	b	a	a	h	b	a	b	b	a	b	h	b	a	b	a	a	b	-	a	b	b	h	a	b	a
A06	AX-176800438	AX-176800438_A06	87.731	Arahy.06	80741296		b	a	b	-	a	a	a	a	a	a	b	h	b	-	a	h	b	a	b	a	a	-	b	a	b	b	a	b	b	b	a	b	a	a	b	a	a	b	b	b	a	-	a
A06	AX-176817535	AX-176817535_A06	90.06	Arahy.06	20661657		b	a	b	h	a	a	a	a	a	a	b	h	b	h	a	a	-	a	h	a	a	a	h	a	b	b	a	b	b	b	a	-	a	a	b	h	a	h	b	b	a	b	a
A06	AX-176796501	AX-176796501_A06	93.285	Arahy.06	64575824		b	a	b	h	-	a	a	a	a	h	b	-	b	-	h	h	b	a	-	a	-	-	-	a	b	b	a	b	b	b	a	b	a	a	b	h	a	h	b	-	a	b	-
A06	AX-176799874	AX-176799874_A06	96.127	Arahy.06	53922979		b	a	b	h	a	a	a	a	a	a	b	h	b	-	a	a	b	a	b	a	a	h	b	a	b	b	a	b	b	b	-	b	a	a	b	h	a	h	b	b	a	b	a
A06	AX-176810003	AX-176810003_A06	97.626	Arahy.06	63939584		b	a	b	-	a	a	a	a	a	a	b	a	b	h	a	a	b	a	b	a	a	h	b	a	b	b	a	b	b	b	a	b	a	a	b	h	a	h	b	b	a	b	a
A06	AX-176804429	AX-176804429_A06	99.166	Arahy.06	22608916		b	a	b	h	a	a	a	a	-	a	b	h	b	h	a	a	-	a	b	a	-	h	b	-	b	-	a	b	b	b	a	b	a	a	b	h	a	h	b	b	-	b	a
A06	AX-176799440	AX-176799440_A06	99.621	Arahy.06	20199228		b	a	b	h	a	a	a	a	a	a	b	h	b	h	a	a	b	a	b	a	a	h	b	a	b	b	a	b	b	b	a	b	a	a	b	h	a	h	b	b	a	b	a
A06	AX-176798546	AX-176798546_A06	99.84	Arahy.06	28372503		b	a	b	h	a	a	a	a	a	a	b	h	b	h	a	a	b	a	b	a	a	h	b	a	b	b	a	b	b	b	a	b	a	a	b	h	a	h	b	b	a	b	a
A06	AX-176798030	AX-176798030_A06	99.949	Arahy.06	19728606		b	a	b	h	a	a	a	a	a	a	b	h	b	h	a	a	b	a	b	a	a	h	b	a	b	b	a	b	b	b	a	b	a	a	b	h	a	h	b	b	a	b	a
A06	AX-176799805	AX-176799805_A06	100.206	Arahy.06	23061447		b	a	b	h	a	a	a	a	a	a	b	-	b	h	a	a	b	a	b	a	a	h	b	a	b	b	a	b	b	b	a	b	a	a	b	h	a	h	b	b	-	b	a
A06	AX-147251491	AX-147251491_B06	100.462	Arahy.06	32892		b	a	b	h	a	a	a	a	a	a	b	-	b	h	a	a	b	a	b	a	a	h	b	a	b	b	a	b	b	b	a	b	a	a	b	h	a	h	b	b	a	b	a
A06	AX-176809764	AX-176809764_A06	100.848	Arahy.06	38100050		b	a	b	h	a	a	a	a	-	a	b	a	b	h	-	a	b	a	b	a	a	h	b	a	b	-	a	b	b	b	a	b	a	a	b	h	a	-	b	b	a	b	a
A06	AX-176797098	AX-176797098_A06	101.194	Arahy.06	27428287		b	a	b	h	a	a	a	a	a	a	b	a	b	h	a	a	b	a	b	a	a	h	b	a	b	b	a	b	b	b	a	b	a	a	b	h	a	h	b	b	a	b	a
A06	AX-147225265	AX-147225265_A06	101.331	Arahy.06	25156720		b	a	b	h	a	a	a	a	a	a	b	a	b	h	a	a	b	a	b	a	a	-	b	a	b	b	a	b	b	b	a	b	a	a	b	h	a	-	b	b	a	b	a
A06	AX-176815050	AX-176815050_A06	101.899	Arahy.06	46229954		b	a	b	h	a	a	a	a	a	a	b	-	b	h	a	a	b	a	b	a	a	h	b	a	b	b	a	b	b	b	a	b	a	a	b	h	a	a	b	b	a	b	a
A06	AX-176811001	AX-176811001_A06	102.297	Arahy.06	52164919		b	a	b	h	a	a	a	a	a	a	b	h	b	h	a	a	b	a	b	a	a	h	b	a	b	b	a	b	b	b	a	b	a	a	b	h	a	-	b	b	a	b	a
A06	AX-176813005	AX-176813005_A06	102.313	Arahy.06	59131425		b	a	b	h	a	a	a	a	a	a	b	h	b	h	a	a	b	a	b	a	a	h	b	a	b	b	a	b	b	b	a	b	a	a	b	h	a	h	b	b	a	b	a
A06	AX-176795638	AX-176795638_A06	102.605	Arahy.06	60931950		b	a	b	h	a	a	a	a	a	a	b	h	b	h	a	a	b	a	b	a	a	h	b	a	b	b	a	b	b	b	a	b	a	a	b	h	a	h	b	b	a	b	a
A06	AX-176792916	AX-176792916_A06	102.749	Arahy.06	76349824		b	a	b	-	a	a	a	a	a	a	b	h	b	h	a	a	b	a	b	a	a	h	b	a	b	b	a	b	b	b	a	b	a	a	b	h	a	h	b	b	a	b	a
A06	AX-176804545	AX-176804545_A06	102.899	Arahy.06	77534150		b	a	b	h	a	a	a	a	a	a	b	h	b	h	a	a	b	a	b	a	a	h	b	a	b	b	a	b	b	b	a	b	a	a	b	h	a	h	b	b	a	b	a
A06	AX-176797557	AX-176797557_A06	103.136	Arahy.06	69024882		b	a	b	h	a	a	a	a	a	a	b	b	b	h	a	a	b	a	b	a	a	h	b	a	b	b	a	b	b	b	a	b	a	a	b	h	a	h	b	b	a	b	a
A06	AX-176805855	AX-176805855_A06	103.331	Arahy.06	75650122		b	a	b	h	a	a	a	a	a	a	b	h	b	h	a	a	b	a	b	a	a	h	b	a	b	b	a	b	b	b	a	b	a	a	b	h	a	-	b	b	a	b	a
A06	AX-176817640	AX-176817640_A06	103.732	Arahy.06	81530606		b	a	b	h	a	a	a	a	a	a	b	h	b	h	a	a	b	a	b	a	a	h	b	a	b	b	a	b	b	b	a	b	a	a	b	h	a	a	b	b	a	b	a
A06	AX-176806064	AX-176806064_A06	104.072	Arahy.06	81561884		b	a	b	-	a	a	a	a	-	a	b	h	b	h	a	a	b	a	b	a	a	-	b	a	b	b	a	b	b	b	a	b	a	a	b	h	a	-	b	b	a	b	a
A06	AX-176812125	AX-176812125_A06	105.163	Arahy.06	78184934		b	a	b	h	a	a	a	a	h	a	b	h	b	h	h	a	b	a	-	a	a	h	b	a	b	b	a	-	b	b	-	b	a	-	b	h	a	-	b	-	a	b	a
A06	AX-147225664	AX-147225664_A06	106.084	Arahy.06	84431773		b	a	b	h	a	a	a	a	a	a	b	h	b	h	a	a	b	a	b	a	a	h	b	a	b	b	a	b	b	b	a	b	a	a	b	h	a	h	b	b	a	b	a
A06	AX-176794744	AX-176794744_A06	106.301	Arahy.06	84068998		b	a	b	h	a	a	a	a	a	a	b	h	b	h	a	a	b	a	b	a	a	h	b	a	b	b	a	b	b	b	a	b	a	a	b	h	a	h	b	b	a	b	a
A06	AX-176793656	AX-176793656_A06	106.518	Arahy.06	82068143		b	a	b	h	a	a	a	a	a	a	b	h	b	h	a	a	b	a	b	a	a	h	b	a	b	b	a	b	b	b	a	b	a	a	b	h	a	h	b	b	a	b	a
A06	AX-176795256	AX-176795256_A06	106.518	Arahy.06	82435056		b	a	b	h	a	a	a	a	a	a	b	-	b	h	a	a	b	a	b	a	a	h	b	a	b	b	a	b	b	b	a	b	a	a	b	h	a	h	b	b	a	b	a
A06	AX-176810570	AX-176810570_A06	106.518	Arahy.06	81016436		b	a	b	h	a	a	a	a	a	a	b	h	b	h	a	a	b	a	b	a	a	h	b	a	b	b	a	b	b	b	a	b	a	a	b	h	a	h	b	b	a	b	a
A06	AX-176806649	AX-176806649_A06	106.736	Arahy.06	82690149		b	a	b	h	a	a	a	a	a	a	b	h	b	h	a	a	b	a	b	a	a	h	b	a	b	b	a	b	b	b	a	b	a	a	b	a	a	h	b	b	a	b	a
A06	AX-176806227	AX-176806227_A06	107.172	Arahy.06	77363859		b	a	b	h	a	a	a	-	a	a	b	h	b	h	a	a	b	a	b	a	a	h	b	a	b	b	a	b	b	b	a	b	a	a	b	-	a	h	b	b	a	b	a
A06	AX-176819598	AX-176819598_A06	107.174	Arahy.06	74900050		b	a	b	h	a	a	a	a	a	a	b	h	b	-	a	a	b	a	b	a	a	h	b	a	b	b	a	b	b	b	a	b	a	a	b	h	a	h	b	b	a	b	a
A06	AX-176811108	AX-176811108_A06	107.178	Arahy.06	80077159		b	a	b	h	a	a	a	a	a	a	b	h	b	h	a	a	b	a	b	a	a	h	b	a	b	b	a	b	b	b	a	b	a	a	b	h	a	h	b	b	a	b	a
A06	AX-176807067	AX-176807067_A06	107.391	Arahy.06	75279342		b	a	b	h	a	a	a	a	a	a	-	h	b	h	a	a	-	a	-	a	a	h	b	a	-	b	a	b	b	b	a	b	a	a	b	-	a	h	b	b	a	b	a
A06	AX-176801112	AX-176801112_A06	107.608	Arahy.06	71152355		b	a	b	h	a	a	a	a	a	a	b	h	b	h	a	a	b	a	b	a	a	h	b	a	b	b	a	b	b	b	a	b	a	a	b	h	a	h	b	b	a	b	a
A06	AX-147225526	AX-147225526_A06	107.717	Arahy.06	78522133		b	a	b	h	a	a	a	a	a	a	b	h	b	h	a	a	b	a	b	a	a	h	b	a	b	b	a	b	b	b	a	b	a	a	b	h	a	h	b	b	a	b	a
A06	AX-147225412	AX-147225412_A06	107.858	Arahy.06	49701460		b	a	b	h	a	a	a	a	a	a	b	h	b	h	a	a	b	a	b	a	a	h	b	a	b	b	a	b	b	b	a	b	a	a	b	h	a	h	b	b	a	b	a
A06	AX-177639672	AX-177639672_A06	108.001	Arahy.06	55196226		b	a	b	h	a	a	a	a	a	a	b	h	b	h	a	a	b	a	b	a	a	h	b	a	b	b	a	b	b	b	a	b	a	a	b	h	a	h	b	b	a	b	a
A06	AX-176808798	AX-176808798_A06	108.177	Arahy.06	63753623		b	a	b	h	a	a	-	a	a	a	b	-	b	-	a	a	b	a	b	a	a	h	b	a	b	b	-	b	b	b	a	b	a	a	b	h	-	h	b	b	a	b	a
A06	AX-176805083	AX-176805083_A06	108.975	Arahy.06	27967847		b	a	b	h	a	a	a	a	-	-	b	-	b	-	-	a	b	-	b	-	a	h	b	a	b	b	-	b	b	b	h	b	a	a	b	-	-	h	b	b	a	b	-
A06	AX-176809419	AX-176809419_A06	112.469	Arahy.06	51062988		b	h	b	h	-	-	a	a	a	h	b	b	b	-	-	-	b	-	b	a	a	h	h	a	b	b	a	-	b	b	h	b	-	-	b	h	a	-	b	b	a	b	h
A06	AX-176813650	AX-176813650_A06	116.699	Arahy.06	41019597		b	-	b	h	a	a	a	a	a	a	b	h	b	h	a	a	b	h	b	a	a	h	b	a	b	b	a	b	b	b	-	b	-	h	b	h	h	h	b	b	-	b	-
A06	AX-176801853	AX-176801853_A06	119.716	Arahy.06	25644759		b	a	b	-	a	a	a	a	-	-	b	h	b	h	a	a	b	-	b	-	a	h	b	a	b	b	a	b	b	b	a	b	a	a	b	-	a	h	b	b	a	b	a
A06	AX-176802104	AX-176802104_A06	120.744	Arahy.06	81891308		b	a	b	h	a	a	a	a	a	a	b	-	b	h	a	a	b	h	b	a	a	h	b	-	b	b	a	b	b	b	a	b	a	a	b	h	a	h	b	b	a	b	a
A06	AX-176793602	AX-176793602_A06	121.414	Arahy.06	73635934		b	a	b	h	a	a	a	a	a	a	b	h	b	h	a	a	b	a	b	a	a	h	b	a	b	b	a	b	b	b	a	b	a	a	b	h	a	h	b	b	a	b	a
A06	AX-176795666	AX-176795666_A06	121.692	Arahy.06	80046197		b	a	b	h	a	a	a	a	a	a	b	h	b	h	a	a	b	a	b	a	a	h	b	a	b	b	a	b	b	b	a	b	a	a	b	h	a	h	b	b	a	b	a
A06	AX-176803417	AX-176803417_A06	121.696	Arahy.06	71426551		b	a	b	h	a	a	a	a	a	a	b	h	b	h	a	a	b	a	b	a	a	h	b	a	b	b	a	b	b	b	a	b	a	a	b	h	a	h	b	b	a	b	a
A06	AX-176794289	AX-176794289_A06	121.746	Arahy.06	70227992		b	a	b	h	a	a	a	a	a	a	b	h	b	h	a	a	b	a	b	a	a	h	b	a	b	b	a	b	b	b	a	b	a	a	b	h	a	h	b	b	a	b	a
A06	AX-176819575	AX-176819575_A06	121.804	Arahy.06	61895333		b	a	b	h	a	a	a	a	a	a	b	h	b	h	a	a	b	a	b	a	a	h	b	a	b	b	a	b	b	b	a	b	a	a	b	h	a	h	b	b	a	b	a
A06	AX-176819983	AX-176819983_A06	122.021	Arahy.06	39892267		b	a	b	h	a	a	a	a	a	a	b	h	b	h	a	a	b	a	b	a	a	h	b	a	b	b	a	b	b	b	a	b	a	a	b	h	a	h	b	b	a	b	a
A06	AX-176803159	AX-176803159_A06	122.028	Arahy.06	21795285		b	a	b	h	a	a	a	-	a	a	b	-	b	h	a	a	b	a	b	a	a	h	b	a	b	b	a	b	b	b	-	b	a	a	b	h	a	h	b	b	a	b	a
A06	AX-176809942	AX-176809942_A06	122.284	Arahy.06	32028216		b	a	b	h	a	a	a	a	a	a	b	h	b	h	a	a	b	a	b	a	a	h	b	-	b	b	a	b	b	b	a	b	a	a	b	-	a	h	b	b	a	b	a
A06	AX-176798131	AX-176798131_A06	122.715	Arahy.06	20735839		b	a	b	h	a	a	a	a	a	a	b	h	b	h	a	-	b	a	b	a	a	h	b	a	b	b	a	b	b	b	a	b	a	a	b	h	a	h	b	h	a	b	a
A06	AX-176798611	AX-176798611_A06	123.413	Arahy.06	25745337		b	a	b	h	a	a	a	a	a	a	b	h	b	h	a	a	b	a	b	a	a	h	b	a	b	b	a	b	b	b	a	b	a	a	b	h	a	h	b	b	a	b	a
A06	AX-176804572	AX-176804572_A06	124.412	Arahy.06	82502771		b	a	b	h	a	a	a	a	a	a	b	h	b	h	a	a	b	a	b	a	a	h	b	a	b	b	a	b	b	b	a	b	a	a	b	h	a	h	b	b	a	b	a
A06	AX-176818501	AX-176818501_A06	125.163	Arahy.06	25127371		b	a	b	h	a	-	a	a	a	a	b	h	b	-	a	a	b	a	b	a	a	h	b	a	b	b	a	b	b	b	a	b	a	a	b	h	a	h	b	b	a	b	a
A06	AX-147252753	AX-147252753_B06	126.011	Arahy.06	37157376		b	a	b	h	a	a	a	a	a	a	b	-	b	h	a	a	b	a	b	a	a	h	b	a	b	b	a	b	b	b	a	b	a	a	b	h	a	h	b	b	a	b	-
A06	AX-147252752	AX-147252752_B06	126.012	Arahy.06	37153374		b	a	b	h	a	a	a	a	a	a	b	h	b	h	a	a	b	-	b	a	a	h	b	a	b	b	a	b	b	b	a	b	a	a	b	h	a	h	b	b	a	b	a
A06	AX-147225266	AX-147225266_B06	126.533	Arahy.06	37200703		b	a	b	h	a	a	a	a	a	a	b	h	b	h	a	a	b	a	b	a	a	h	b	a	b	b	a	b	b	b	a	b	a	a	b	h	a	-	b	b	a	b	a
A06	AX-176802018	AX-176802018_A06	126.581	Arahy.06	22890573		b	a	b	h	a	a	a	a	a	a	b	h	b	-	a	a	b	a	b	a	a	h	b	a	b	b	a	b	b	b	a	b	a	a	b	-	a	a	b	b	a	b	a
A06	AX-176795886	AX-176795886_A06	126.886	Arahy.06	25581276		b	a	b	h	a	a	a	a	a	a	b	h	b	a	a	a	b	a	b	a	a	h	b	a	b	b	a	b	b	b	a	b	a	a	b	h	a	h	b	b	a	b	a
A06	AX-147225242	AX-147225242_A06	127.378	Arahy.06	22710504		b	-	b	h	a	a	a	a	a	a	b	h	b	-	-	a	b	a	b	a	a	h	b	a	b	b	a	b	b	b	a	b	a	a	b	h	-	h	b	b	a	b	a
A06	AX-176806013	AX-176806013_A06	128.815	Arahy.06	25149402		b	h	b	h	a	-	-	a	a	a	b	h	b	-	a	a	b	a	b	-	a	-	b	a	b	b	a	b	b	b	a	b	a	-	b	h	a	h	b	b	a	b	-
A06	AX-176800021	AX-176800021_A06	130.937	Arahy.06	42295622		b	h	b	b	a	h	a	h	a	-	b	-	b	h	-	a	b	-	b	-	a	b	b	-	b	b	a	b	b	b	a	b	-	a	b	b	-	-	b	b	-	b	a
A06	AX-177644387	AX-177644387_A06	133.858	Arahy.06	25689859		b	a	b	h	a	a	a	a	a	a	b	-	b	-	a	a	b	a	b	a	a	-	b	a	b	b	a	b	b	b	a	b	a	a	b	h	a	-	b	b	a	b	a
A06	AX-176798677	AX-176798677_A06	135.11	Arahy.06	39892710		b	a	b	h	a	a	a	-	a	a	b	h	b	-	a	a	b	a	b	a	a	a	b	a	b	b	a	b	b	b	a	b	a	a	b	h	a	-	b	b	a	b	a
A06	AX-176816110	AX-176816110_A06	135.435	Arahy.06	34154969		b	a	b	h	a	a	a	a	a	a	b	h	b	a	a	a	b	a	b	a	a	-	b	a	b	b	a	b	b	b	a	b	a	a	b	h	a	h	b	b	a	b	a
A06	AX-176819501	AX-176819501_A06	135.801	Arahy.06	35440712		b	a	b	h	a	a	a	a	a	a	b	h	b	h	a	a	b	a	b	a	a	h	b	a	b	b	a	b	b	b	a	b	a	a	b	h	a	h	b	b	a	b	a
A06	AX-177640937	AX-177640937_A06	135.822	Arahy.06	25690091		b	a	b	h	-	a	a	a	a	a	b	h	b	-	a	a	b	a	b	a	a	-	b	a	b	b	a	b	b	b	a	b	a	a	b	h	a	h	b	b	a	b	a
A06	AX-176798847	AX-176798847_A06	135.868	Arahy.06	29374758		b	a	b	h	a	a	-	a	a	a	b	h	b	h	a	a	b	a	b	a	a	h	b	a	b	b	a	b	b	b	a	b	a	a	b	h	a	h	b	b	a	b	a
A06	AX-176819722	AX-176819722_A06	135.93	Arahy.06	19554334		b	a	b	h	a	a	a	a	a	a	b	h	b	h	a	a	b	a	b	a	a	h	b	a	b	b	a	b	b	b	a	b	a	a	b	h	a	h	b	b	a	b	a
A06	AX-176793450	AX-176793450_A06	136.039	Arahy.06	19596297		b	a	b	h	a	a	a	a	a	a	b	h	b	h	a	a	b	a	b	a	a	h	b	a	b	b	a	b	b	b	a	b	a	a	b	h	a	h	b	b	a	b	a
A06	AX-176805991	AX-176805991_A06	136.366	Arahy.06	41310273		b	a	b	h	a	a	a	a	a	a	b	h	b	h	a	a	b	a	b	a	a	h	b	a	b	b	a	b	b	b	a	b	a	a	b	h	a	h	b	b	a	b	a
A06	AX-177644525	AX-177644525_A06	136.723	Arahy.06	20195968		b	a	b	h	a	a	a	a	a	a	b	-	b	h	a	a	b	a	b	a	a	h	b	a	b	b	a	b	b	b	a	b	a	a	b	-	a	h	b	b	a	b	a
A06	AX-176801627	AX-176801627_A06	136.949	Arahy.06	25436067		b	a	b	-	a	a	a	a	a	a	b	-	b	-	a	a	b	a	b	a	a	h	b	a	b	b	a	b	b	b	a	b	a	a	b	a	a	h	b	b	a	b	a
A06	AX-176823769	AX-176823769_A06	138.738	Arahy.06	25103911		b	a	b	a	a	a	a	a	a	a	b	-	b	a	a	a	b	a	b	a	a	a	b	a	b	b	a	b	b	b	a	b	a	a	b	a	a	a	b	b	a	b	a
A06	AX-176795227	AX-176795227_A06	138.742	Arahy.06	25435991		b	a	b	a	a	a	a	a	a	a	b	a	b	a	a	a	b	a	b	a	a	a	b	a	b	b	a	b	b	b	a	b	a	a	b	a	a	a	b	b	a	b	a
A06	AX-176796914	AX-176796914_A06	138.85	Arahy.06	25654138		b	a	b	a	a	a	a	a	a	a	b	a	b	a	a	a	b	a	b	a	a	a	b	a	b	b	a	b	b	b	a	b	a	a	b	a	a	a	b	b	a	b	a
A06	AX-176811874	AX-176811874_A06	139.068	Arahy.06	25175964		b	a	b	a	a	a	a	a	a	a	b	a	b	a	a	a	b	a	b	a	a	a	b	a	b	b	a	b	b	b	a	b	a	a	b	a	a	a	b	b	a	b	a
A06	AX-176805054	AX-176805054_A06	139.176	Arahy.06	25422074		b	a	b	-	a	a	a	a	a	a	b	-	b	a	a	a	b	a	b	a	a	a	b	a	b	b	a	b	b	b	a	b	a	a	b	a	a	a	b	b	a	b	a
A06	AX-176810600	AX-176810600_A06	139.545	Arahy.06	25436078		b	a	b	a	a	a	a	a	a	a	b	-	b	a	a	a	b	a	b	a	a	a	b	a	b	b	a	b	b	b	a	b	a	a	b	a	a	a	b	b	a	b	a
A06	AX-176802644	AX-176802644_A06	140.165	Arahy.06	25175845		b	a	b	a	a	a	a	a	a	a	b	a	b	a	a	a	b	a	b	a	a	a	b	a	b	b	a	b	b	b	a	b	a	a	b	a	a	a	b	b	a	b	a
A06	AX-176802312	AX-176802312_A06	141.317	Arahy.06	25435977		b	a	b	h	a	a	a	a	-	a	b	-	b	a	a	-	b	a	b	a	a	-	b	a	b	b	a	b	b	b	a	b	a	a	b	h	a	h	b	b	a	b	a
A06	AX-176796442	AX-176796442_A06	142.522	Arahy.06	74549869		b	a	b	h	-	a	-	a	a	a	b	h	b	a	a	a	b	a	b	a	a	h	b	a	b	b	a	b	b	b	a	b	a	a	b	h	a	h	b	b	a	b	a
A06	AX-176793796	AX-176793796_A06	142.81	Arahy.06	45114310		b	a	b	h	a	a	a	a	a	a	b	h	b	-	a	a	b	a	b	a	a	h	b	a	b	b	a	b	b	b	a	b	a	a	b	h	a	h	b	b	a	b	a
A06	AX-176807199	AX-176807199_A06	143.284	Arahy.06	42698215		b	a	b	h	a	a	a	a	a	a	b	h	b	h	a	a	b	a	b	a	a	h	b	a	b	b	a	b	b	b	a	b	a	a	b	h	a	h	b	b	a	b	a
A06	AX-176822443	AX-176822443_A06	143.357	Arahy.06	21934139		b	a	b	h	a	a	a	a	a	a	b	h	b	h	a	a	b	a	b	a	a	-	b	a	b	b	a	b	b	b	a	b	a	a	b	h	a	h	b	b	a	b	a
A06	AX-176803513	AX-176803513_A06	143.671	Arahy.06	29630829		b	-	b	-	-	a	a	a	h	a	b	h	b	-	a	a	b	a	b	a	a	h	b	a	b	b	a	b	b	b	a	b	a	a	b	h	a	h	b	b	a	b	a
A06	AX-176806771	AX-176806771_A06	144.189	Arahy.06	25176238		b	a	b	h	h	a	-	-	a	a	b	h	b	-	a	-	b	a	b	a	a	h	b	a	b	b	a	b	b	b	a	b	a	a	b	h	a	h	b	b	a	b	a
A06	AX-176812940	AX-176812940_A06	144.571	Arahy.06	25436560		b	a	b	h	-	a	a	h	a	a	b	b	b	-	-	-	b	a	b	a	a	h	b	-	b	b	a	b	b	b	-	b	-	a	b	h	a	-	b	b	a	b	a
A06	AX-176801471	AX-176801471_A06	145.703	Arahy.06	47748430		b	a	b	h	a	a	a	h	a	a	b	-	b	-	a	a	b	a	b	a	a	h	b	-	b	h	a	b	b	b	a	b	a	a	b	h	a	-	b	b	a	b	a
A06	AX-176819672	AX-176819672_A06	146.427	Arahy.06	54081458		b	a	b	-	a	a	a	-	a	a	b	h	b	-	a	a	b	-	b	a	a	h	b	a	b	b	a	b	b	b	-	b	a	a	b	-	a	h	b	b	a	b	a
A06	AX-176818718	AX-176818718_A06	146.623	Arahy.06	67918086		b	a	b	h	a	a	a	a	a	a	b	h	b	h	a	a	b	a	b	a	a	h	b	a	b	b	a	b	b	b	a	b	a	a	b	h	a	h	b	b	a	b	a
A06	AX-176805691	AX-176805691_A06	146.627	Arahy.06	47778076		b	a	b	h	a	a	a	a	a	a	-	h	-	h	a	a	b	a	b	a	a	h	b	a	b	b	a	b	b	b	a	b	a	a	b	h	a	h	b	b	a	b	a
A06	AX-147225333	AX-147225333_A06	146.627	Arahy.06	44397754		b	a	b	h	a	a	a	a	a	a	b	h	b	h	a	a	b	a	b	a	a	h	b	a	b	b	a	b	b	b	a	b	a	a	b	h	a	h	b	b	a	b	a
A06	AX-176803344	AX-176803344_A06	147.18	Arahy.06	57097656		b	a	b	h	a	a	a	a	a	a	b	h	b	h	a	-	b	a	b	a	a	a	b	a	b	b	a	b	b	b	a	b	a	a	b	h	a	h	b	b	a	b	a
A06	AX-176815045	AX-176815045_A06	147.724	Arahy.06	59649515		b	a	b	h	a	a	a	a	a	a	b	h	b	h	a	a	b	a	b	a	a	h	b	a	b	b	a	b	-	b	a	b	a	a	b	h	a	h	b	b	a	b	a
A06	AX-176808990	AX-176808990_A06	147.724	Arahy.06	59090521		b	a	b	h	a	a	a	a	a	a	b	h	b	h	a	a	b	a	b	a	a	h	b	a	b	b	a	b	b	b	a	b	a	a	b	h	a	h	b	b	a	b	a
A06	AX-147225399	AX-147225399_A06	147.776	Arahy.06	57270369		b	a	b	h	a	a	a	a	a	a	b	-	b	h	a	a	b	a	b	a	a	h	b	a	b	b	a	b	b	b	a	b	a	a	b	h	a	h	b	b	a	b	a
A06	AX-147225379	AX-147225379_A06	147.833	Arahy.06	52998325		b	a	b	h	a	a	a	a	a	a	b	h	b	h	a	a	b	a	b	a	a	h	b	a	b	b	a	b	b	b	a	b	a	a	b	h	a	h	b	b	a	b	a
A06	AX-176813034	AX-176813034_A06	148.05	Arahy.06	63131545		b	a	b	h	a	a	a	a	a	a	b	h	b	h	a	a	b	a	b	a	a	h	b	a	b	b	a	b	b	b	-	b	a	a	b	h	a	h	b	b	a	b	a
A06	AX-176808543	AX-176808543_A06	148.376	Arahy.06	29669367		b	a	b	h	a	a	a	-	a	a	b	h	b	h	-	a	b	-	b	a	a	h	b	a	b	b	a	b	b	b	a	b	a	a	b	h	a	-	b	b	a	b	a
A06	AX-176810710	AX-176810710_A06	148.706	Arahy.06	25436527		b	a	b	h	a	a	a	a	a	a	b	h	b	-	a	a	b	a	b	a	a	h	b	a	b	b	a	b	b	b	a	b	a	a	b	h	a	a	b	b	a	b	a
A06	AX-176818748	AX-176818748_A06	148.99	Arahy.06	36691858		b	a	b	h	a	a	a	a	a	a	b	h	b	h	a	a	b	a	b	a	a	h	b	a	b	b	a	b	b	b	a	b	a	a	b	h	a	a	b	b	a	b	a
A06	AX-147225276	AX-147225276_B06	149.192	Arahy.06	37416770		b	a	b	h	a	a	a	a	a	a	b	h	b	h	a	a	b	a	b	a	a	h	b	a	b	b	a	b	b	b	a	b	a	a	b	h	a	h	b	b	a	b	a
A06	AX-176802299	AX-176802299_A06	149.417	Arahy.06	21521654		b	-	b	-	a	a	a	a	a	a	b	h	b	h	a	a	b	-	b	a	a	h	b	a	b	b	a	b	b	b	a	b	a	a	b	h	a	h	b	b	a	b	a
A06	AX-176797953	AX-176797953_A06	149.661	Arahy.06	19825429		b	a	b	h	a	a	a	a	a	a	b	h	b	h	a	a	b	a	b	a	a	h	b	a	b	b	a	b	b	b	a	b	a	a	b	h	a	h	b	b	a	b	a
A06	AX-176796062	AX-176796062_A06	149.698	Arahy.06	24066973		b	a	b	h	a	a	a	a	a	a	b	h	b	h	a	a	b	a	b	a	a	h	b	a	b	b	a	b	b	b	a	b	a	a	b	h	a	h	b	b	a	b	a
A06	AX-176802056	AX-176802056_A06	150.123	Arahy.06	21076045		b	a	b	h	a	a	a	a	a	a	b	h	b	h	a	a	b	a	b	a	a	h	b	a	b	b	a	b	b	b	a	b	a	a	b	-	a	h	b	b	a	b	a
A06	AX-176816046	AX-176816046_A06	150.123	Arahy.06	20701572		b	a	b	h	a	a	a	a	a	a	b	h	b	h	a	a	b	a	b	a	a	h	b	a	b	b	a	b	b	b	a	b	a	a	b	h	a	h	b	b	a	b	a
A06	AX-176801055	AX-176801055_A06	150.561	Arahy.06	24434118		b	a	b	h	a	a	a	a	a	a	b	h	b	h	a	a	b	a	b	a	a	h	b	a	b	b	a	b	b	b	a	b	a	a	b	h	a	h	b	b	a	b	a
A06	AX-147225136	AX-147225136_B06	150.562	Arahy.06	619267		b	a	b	h	a	a	a	a	a	a	b	h	b	h	a	a	b	a	b	a	a	h	b	a	b	b	a	b	b	b	a	b	a	a	b	h	a	h	b	b	a	b	a
A06	AX-176794701	AX-176794701_A06	150.888	Arahy.06	64763149		b	a	b	h	a	a	a	a	a	-	b	h	b	h	a	a	b	a	b	a	a	h	b	a	b	b	a	b	b	b	a	b	a	a	b	h	a	h	b	b	a	b	a
A06	AX-176797470	AX-176797470_A06	150.888	Arahy.06	64758020		b	a	b	h	a	a	a	a	a	a	b	h	b	-	a	a	b	a	b	a	a	h	b	a	b	b	a	b	b	b	a	b	a	a	b	h	a	h	b	b	a	b	a
A06	AX-176801607	AX-176801607_A06	150.996	Arahy.06	44369890		b	a	b	h	a	a	a	a	a	a	b	h	b	h	a	a	b	a	b	a	a	h	b	a	b	b	a	b	b	b	a	b	a	a	b	h	a	h	b	b	a	b	a
A06	AX-176811581	AX-176811581_A06	151.215	Arahy.06	57100376		b	a	b	h	a	a	a	a	a	a	b	h	b	h	a	a	b	a	b	a	a	h	b	a	b	b	a	b	b	b	a	b	a	a	b	h	a	h	b	b	a	b	a
A06	AX-176813622	AX-176813622_A06	151.694	Arahy.06	49691019		b	a	b	h	a	a	a	a	a	a	b	h	b	h	a	a	b	a	b	a	a	h	b	a	b	b	a	b	b	b	a	b	a	a	b	h	a	h	b	b	a	b	a
A06	AX-176822847	AX-176822847_A06	152.549	Arahy.06	75625342		b	a	b	h	a	a	a	a	a	a	b	-	b	-	a	a	b	a	b	a	a	h	b	a	b	b	a	b	b	b	-	b	a	a	b	h	a	h	b	b	a	b	a
A06	AX-176797664	AX-176797664_A06	153.551	Arahy.06	74899980		b	a	b	h	a	a	a	a	a	a	b	h	b	-	a	a	b	a	b	a	a	h	b	a	b	b	a	b	b	b	a	b	a	a	b	h	a	h	b	b	a	b	a
A06	AX-176807922	AX-176807922_A06	154.374	Arahy.06	70008100		b	a	-	h	a	a	a	a	a	a	b	-	b	h	a	a	b	a	b	a	a	h	b	a	b	b	a	b	b	b	a	b	a	a	b	h	a	h	-	b	a	b	a
A06	AX-176812178	AX-176812178_A06	155.866	Arahy.06	32873674		b	a	b	h	a	a	a	a	a	a	b	h	b	-	a	a	b	a	b	a	a	h	b	a	-	b	a	b	h	b	a	b	a	a	b	h	a	h	b	-	-	b	a
A06	AX-176811762	AX-176811762_A06	157.901	Arahy.06	19017021		b	a	h	h	a	a	a	a	a	a	b	h	b	a	a	a	-	a	b	a	a	h	b	a	b	b	a	h	b	b	a	b	a	a	b	a	a	h	b	b	a	b	a
A06	AX-147251516	AX-147251516_B06	159.11	Arahy.06	350772		b	a	b	-	a	a	a	a	a	a	b	-	b	h	a	a	-	-	b	a	a	h	b	a	b	b	a	b	b	b	a	b	a	a	b	h	a	h	b	b	a	b	-
A06	AX-176804519	AX-176804519_A06	159.245	Arahy.06	21063497		b	a	b	h	a	a	a	a	a	a	b	h	b	h	a	a	b	a	b	a	a	h	b	a	b	b	a	b	b	b	a	b	a	a	b	h	a	h	b	b	a	b	a
A06	AX-176814046	AX-176814046_A06	159.291	Arahy.06	34590343		b	a	b	h	a	a	a	a	a	a	b	h	b	h	a	a	b	a	b	a	a	h	b	a	b	b	a	b	b	b	a	b	a	a	b	h	a	h	b	b	a	b	a
A06	AX-176793224	AX-176793224_A06	159.353	Arahy.06	35440782		b	a	b	h	a	a	a	a	a	a	b	h	b	h	a	a	b	a	b	a	a	h	b	a	b	b	a	b	b	b	a	b	a	a	b	h	a	h	-	b	a	b	a
A06	AX-176813548	AX-176813548_A06	159.353	Arahy.06	42382244		b	a	b	h	a	a	a	a	a	a	b	h	b	h	a	a	b	a	b	a	a	h	b	a	b	b	a	b	b	b	a	b	a	a	b	h	a	h	b	b	a	b	a
A06	AX-176806732	AX-176806732_A06	159.461	Arahy.06	34570911		b	a	b	-	a	a	a	a	a	a	b	h	b	h	a	a	b	a	b	a	a	h	b	a	b	b	a	b	b	b	a	b	a	a	b	h	a	h	b	b	a	b	a
A06	AX-147225135	AX-147225135_A06	159.57	Arahy.06	19087618		b	a	b	h	a	a	a	a	a	a	b	h	b	h	a	a	b	a	b	a	a	h	b	a	b	b	a	b	b	b	a	b	a	a	b	h	a	h	b	b	a	b	a
A06	AX-176813396	AX-176813396_A06	159.897	Arahy.06	21717875		b	a	b	h	a	a	a	a	a	a	b	h	b	h	a	a	b	a	b	a	a	b	b	a	b	b	a	b	b	b	a	b	a	a	b	h	a	-	b	b	a	b	a
A06	AX-176816834	AX-176816834_A06	160.595	Arahy.06	48348046		b	a	b	h	a	a	a	a	a	a	b	h	b	-	a	a	b	a	b	a	a	b	b	a	b	b	a	b	b	b	a	b	a	a	b	h	a	-	b	b	a	b	-
A06	AX-176806679	AX-176806679_A06	161.006	Arahy.06	58866535		b	a	b	h	a	a	a	a	a	a	b	h	b	h	a	-	b	a	b	a	h	h	b	a	b	b	a	b	b	b	a	b	a	a	b	-	a	h	b	b	a	b	a
A06	AX-176803740	AX-176803740_A06	161.304	Arahy.06	54628528		b	a	b	h	a	a	a	a	a	a	b	h	b	h	a	a	b	a	b	a	a	h	b	a	b	b	a	b	b	b	a	b	a	a	b	h	a	h	b	b	a	b	a
A06	AX-176812612	AX-176812612_A06	161.42	Arahy.06	68846617		b	a	b	h	a	a	a	a	a	a	b	h	b	h	a	-	b	a	b	a	a	h	b	a	b	b	a	b	b	b	a	b	a	a	b	h	a	h	b	b	a	b	a
A06	AX-176815312	AX-176815312_A06	161.444	Arahy.06	51471876		b	a	b	h	a	a	a	-	a	a	b	h	b	h	a	h	b	a	b	a	a	h	b	a	b	b	a	b	b	b	a	b	a	a	b	h	a	h	b	-	a	b	a
A06	AX-176801711	AX-176801711_A06	161.552	Arahy.06	54206406		b	a	b	h	a	a	a	a	a	a	b	h	b	h	a	a	b	a	b	a	a	h	b	a	b	b	a	b	b	b	a	b	a	a	b	h	a	h	b	b	a	b	a
A06	AX-176805604	AX-176805604_A06	161.552	Arahy.06	47661841		b	a	b	h	a	a	a	a	a	a	b	h	b	h	a	a	b	a	b	a	a	h	b	a	b	b	a	b	b	b	a	b	a	a	b	h	a	h	b	b	a	b	a
A06	AX-176822356	AX-176822356_A06	161.552	Arahy.06	50008222		b	a	b	h	a	a	a	a	a	a	b	h	b	h	a	a	b	a	b	a	a	h	b	a	b	b	a	-	b	b	a	b	a	a	b	h	a	h	b	b	a	b	a
A06	AX-176817609	AX-176817609_A06	161.552	Arahy.06	68524427		b	a	b	h	a	a	a	a	a	a	b	h	b	h	a	a	b	a	b	a	a	h	b	a	b	b	a	b	b	b	a	b	a	a	b	h	a	h	b	b	a	b	a
A06	AX-176792675	AX-176792675_A06	161.552	Arahy.06	64109792		b	a	b	h	a	a	a	a	a	a	b	h	b	h	a	a	b	a	b	a	a	h	b	a	b	b	a	b	b	b	a	b	a	a	b	h	a	h	b	b	a	b	a
A06	AX-176823523	AX-176823523_A06	161.661	Arahy.06	55144437		b	a	b	h	a	a	a	a	a	a	b	h	b	h	a	a	b	a	b	a	a	h	b	a	b	b	a	b	b	b	a	b	a	a	b	h	a	h	b	b	a	b	a
A06	AX-176801757	AX-176801757_A06	161.878	Arahy.06	46989808		b	a	b	h	a	a	a	a	a	a	b	h	b	-	a	a	b	a	b	a	a	h	b	a	b	b	a	b	b	b	a	b	a	a	b	h	a	h	b	b	a	b	a
A06	AX-176818637	AX-176818637_A06	162.096	Arahy.06	68847990		b	a	b	h	a	a	a	a	a	a	b	h	b	h	a	a	b	a	b	a	a	h	b	a	b	b	a	b	b	b	a	b	a	a	b	h	a	h	b	b	a	b	a
A06	AX-176800594	AX-176800594_A06	162.386	Arahy.06	22001658		b	a	b	h	a	a	a	a	a	a	b	h	b	h	a	a	b	a	b	a	a	h	b	a	b	b	a	b	b	b	a	b	a	a	b	h	a	h	b	b	a	b	a
A06	AX-176816647	AX-176816647_A06	162.531	Arahy.06	23204149		b	a	b	h	a	a	a	a	a	-	b	h	b	-	a	a	b	a	b	a	a	h	b	a	b	b	a	b	b	b	a	b	a	a	b	h	a	h	b	b	a	b	a
A06	AX-176819810	AX-176819810_A06	162.688	Arahy.06	20723193		b	a	b	h	a	a	a	-	a	a	b	h	b	h	a	a	b	a	b	a	a	-	b	a	b	b	a	b	b	b	a	b	a	a	b	h	a	h	b	b	a	b	a
A06	AX-177637349	AX-177637349_A06	162.858	Arahy.06	39894552		b	a	b	h	a	a	a	a	a	a	b	h	b	h	a	a	b	a	b	a	a	h	b	a	b	b	a	b	b	b	a	b	a	a	b	h	a	h	b	b	a	b	a
A06	AX-176800185	AX-176800185_A06	162.866	Arahy.06	34421674		b	a	b	h	a	a	a	a	a	a	b	h	b	h	a	a	b	a	b	a	a	h	b	a	b	b	a	b	b	b	a	b	a	a	b	h	a	h	b	b	a	b	a
A06	AX-147252751	AX-147252751_B06	163.026	Arahy.06	37151094		b	a	b	h	a	a	a	a	a	a	b	h	b	h	a	a	b	a	b	a	a	h	b	a	b	b	a	b	b	b	a	b	a	a	b	h	a	h	b	b	a	b	a
A06	AX-176809963	AX-176809963_A06	163.436	Arahy.06	27095973		b	a	b	h	a	a	a	a	a	a	b	b	b	h	a	a	b	a	b	a	-	-	b	a	b	b	a	b	b	b	a	b	a	a	b	h	a	h	b	b	a	b	a
A06	AX-176799979	AX-176799979_A06	164.417	Arahy.06	25176129		b	-	b	h	a	a	a	a	a	a	b	-	b	-	a	a	b	a	b	a	a	h	b	a	b	b	a	b	b	b	a	b	a	a	b	-	h	h	b	b	a	b	a
A06	AX-176797826	AX-176797826_A06	165.372	Arahy.06	62366770		b	a	b	h	a	a	a	-	a	a	b	h	b	a	a	a	b	a	b	a	a	h	b	a	b	b	a	b	b	b	a	b	a	-	b	-	a	h	b	b	a	b	a
A06	AX-176802609	AX-176802609_A06	165.851	Arahy.06	64736033		b	a	b	h	a	a	a	a	a	a	b	h	b	h	-	a	b	-	b	a	a	h	b	a	b	b	a	b	b	b	h	b	a	-	b	h	-	-	b	b	a	b	a
A06	AX-147253680	AX-147253680_A06	166.178	Arahy.06	107919575		b	a	b	h	a	a	a	a	a	a	b	h	b	-	a	a	b	a	b	a	a	h	b	-	b	b	a	b	b	b	h	b	a	a	b	h	a	-	b	b	a	b	a
A06	AX-176797539	AX-176797539_A06	166.286	Arahy.06	52780521		b	a	b	h	a	a	a	a	a	a	b	h	b	h	a	a	b	a	b	a	a	h	b	a	b	b	a	b	b	b	h	b	a	a	b	h	a	h	b	b	a	b	a
A06	AX-147225500	AX-147225500_A06	166.289	Arahy.06	61968445		b	a	b	h	a	a	a	a	a	a	b	h	b	h	a	a	b	a	b	a	a	h	b	a	b	b	a	b	b	b	-	b	a	a	b	h	a	h	b	b	a	b	a
A06	AX-176803834	AX-176803834_A06	166.612	Arahy.06	22281891		b	a	b	h	a	a	a	a	a	a	b	h	b	h	a	a	b	a	b	a	a	h	b	a	b	b	a	b	b	b	-	b	a	a	b	h	a	h	b	b	a	b	a
A06	AX-176803926	AX-176803926_A06	166.613	Arahy.06	28501857		b	a	b	h	a	a	a	a	a	a	b	h	b	h	a	a	b	a	b	a	a	h	b	a	b	b	a	b	b	b	a	b	a	a	b	-	a	h	b	b	a	b	a
A06	AX-147225264	AX-147225264_B06	166.668	Arahy.06	37203749		b	a	b	h	a	a	a	a	a	a	b	h	b	h	a	a	b	a	b	a	a	h	b	a	b	b	a	b	b	b	a	b	a	a	b	h	a	h	b	b	a	b	a
A06	AX-176801685	AX-176801685_A06	166.721	Arahy.06	27359928		b	a	b	h	a	a	a	a	a	a	b	h	b	h	a	a	b	a	b	a	a	h	b	a	b	b	a	b	b	b	a	b	a	a	b	h	a	h	b	b	a	b	a
A06	AX-176807971	AX-176807971_A06	166.721	Arahy.06	19554264		b	a	b	h	a	a	a	a	a	a	b	h	b	h	a	a	b	a	b	a	a	h	b	a	b	b	a	b	b	b	a	b	a	a	b	h	a	h	b	b	a	b	a
A06	AX-176792600	AX-176792600_A06	166.83	Arahy.06	27204359		b	a	b	h	a	a	a	a	a	a	b	h	b	h	a	a	b	a	b	a	a	h	b	a	b	b	a	b	b	b	a	b	a	a	b	h	a	h	b	h	a	b	a
A06	AX-176807870	AX-176807870_A06	167.49	Arahy.06	18888376		b	a	b	h	a	a	a	a	a	a	b	b	b	h	a	a	b	a	b	a	a	h	b	a	b	b	a	b	b	b	a	b	a	a	b	h	a	h	b	h	a	b	a
A06	AX-176799463	AX-176799463_A06	168.151	Arahy.06	18503978		b	a	b	h	a	a	a	a	a	a	b	h	b	h	a	a	b	a	b	a	a	h	b	a	b	b	a	b	b	b	a	b	a	a	b	h	a	h	b	b	a	b	a
A06	AX-176795656	AX-176795656_A06	168.151	Arahy.06	18477489		b	a	b	-	a	a	a	a	a	a	b	h	b	h	a	a	b	a	b	a	a	h	b	a	b	b	a	b	b	b	a	b	a	a	b	h	a	-	b	b	a	b	a
A06	AX-176804439	AX-176804439_A06	168.259	Arahy.06	18250568		b	a	b	h	a	a	a	a	a	a	b	h	b	h	a	a	b	a	b	a	a	h	b	a	b	b	a	b	b	b	a	b	a	a	b	h	a	h	b	b	a	b	a
A06	AX-176796349	AX-176796349_A06	168.259	Arahy.06	18325378		b	a	b	h	a	a	a	a	a	a	b	h	b	h	a	a	b	a	b	a	a	h	b	a	b	b	a	b	b	b	a	b	a	a	b	h	a	h	b	b	a	b	a
A06	AX-176819641	AX-176819641_A06	168.808	Arahy.06	17670262		b	a	b	h	a	a	a	a	a	a	b	h	b	h	a	a	b	a	b	a	a	h	b	a	b	b	a	b	b	b	a	b	a	a	b	h	a	h	b	b	a	b	a
A06	AX-176794361	AX-176794361_A06	169.246	Arahy.06	17399025		b	a	b	h	a	a	a	a	a	a	b	h	b	h	a	a	b	a	b	a	a	h	b	a	b	b	a	b	b	b	a	b	a	a	b	h	a	h	b	b	a	b	a
A06	AX-176800590	AX-176800590_A06	169.573	Arahy.06	17531287		b	a	b	h	a	a	a	a	a	a	b	h	b	h	a	a	b	a	b	a	a	h	b	a	b	b	a	b	b	b	a	b	a	a	b	h	a	b	b	b	a	b	a
A06	AX-176812588	AX-176812588_A06	170.071	Arahy.06	17061324		b	a	b	h	a	a	a	a	a	a	b	h	b	h	a	a	b	a	b	a	a	h	b	a	b	b	a	b	b	b	a	b	a	a	b	h	a	h	b	b	a	b	a
A06	AX-177642314	AX-177642314_A06	170.45	Arahy.06	17097452		b	a	b	h	a	a	a	a	a	a	b	h	b	h	a	a	b	a	b	a	a	h	b	a	b	b	a	b	b	b	a	b	a	a	b	h	a	h	b	b	a	b	a
A06	AX-147251667	AX-147251667_A06	171.454	Arahy.06	16561390		b	a	b	h	a	a	a	a	a	a	b	h	b	h	a	a	b	a	b	a	a	h	a	a	b	b	a	b	b	b	a	b	a	a	b	-	a	h	b	b	a	b	a
A06	AX-176807571	AX-176807571_A06	172.733	Arahy.06	16599707		b	a	b	a	a	a	a	a	a	a	h	a	h	a	a	a	b	a	b	a	a	h	a	a	b	b	a	b	b	b	a	b	a	a	b	h	a	h	b	-	a	b	a
A06	AX-147224996	AX-147224996_A06	174.392	Arahy.06	16133024		b	a	b	h	a	a	a	a	a	a	b	h	b	h	a	a	b	a	b	a	a	h	a	a	b	b	a	b	b	b	a	b	a	a	b	h	a	h	b	b	a	b	a
A06	AX-176802705	AX-176802705_A06	174.682	Arahy.06	16124687		b	a	b	h	a	a	a	a	a	a	b	h	b	h	a	a	b	a	b	a	a	h	a	a	b	b	a	b	b	b	a	b	a	a	b	h	a	h	b	b	a	b	a
A06	AX-176815758	AX-176815758_A06	174.829	Arahy.06	15776117		b	a	b	h	a	a	a	a	a	a	b	h	b	h	a	a	b	a	b	a	a	h	a	a	b	b	a	b	b	b	a	b	a	a	b	h	a	h	b	b	a	b	a
A06	AX-176798974	AX-176798974_A06	174.829	Arahy.06	15749846		b	a	b	h	a	a	a	a	a	a	b	h	b	h	a	a	b	a	b	a	a	h	a	a	b	b	a	b	b	b	a	b	a	a	b	h	a	h	b	b	a	b	a
A06	AX-176810059	AX-176810059_A06	174.833	Arahy.06	16215586		b	a	b	h	a	a	a	a	a	a	b	h	b	h	a	a	b	a	b	a	a	h	a	a	b	b	a	b	b	b	a	b	a	a	b	h	a	h	b	b	a	b	a
A06	AX-176818522	AX-176818522_A06	175.489	Arahy.06	16340310		b	a	b	h	a	a	a	a	a	a	b	h	b	h	a	a	b	a	b	a	a	h	a	a	b	b	a	b	b	b	a	b	a	a	b	h	a	-	b	b	a	b	a
A06	AX-176793185	AX-176793185_A06	176.038	Arahy.06	16317391		b	a	b	h	a	a	a	a	a	a	b	h	b	h	a	a	b	a	b	a	a	h	a	a	b	b	a	b	b	b	a	b	a	a	b	h	a	h	b	b	a	b	a
A06	AX-176799236	AX-176799236_A06	176.365	Arahy.06	15171335		b	a	b	h	a	a	a	a	a	a	b	h	b	h	a	a	b	a	b	a	a	h	a	a	b	b	a	b	b	b	a	b	a	a	b	h	a	h	b	b	a	b	a
A06	AX-176801407	AX-176801407_A06	176.365	Arahy.06	15654852		b	a	b	h	a	a	a	a	a	a	b	h	b	h	a	a	b	a	b	a	a	h	a	a	b	b	a	b	b	b	a	b	a	a	b	h	a	-	b	b	a	b	a
A06	AX-176816213	AX-176816213_A06	176.365	Arahy.06	15613206		b	a	b	h	a	a	a	a	a	a	b	h	b	h	a	a	b	a	b	a	a	h	a	a	b	b	a	b	b	b	a	b	a	a	b	h	a	h	b	b	a	b	a
A06	AX-147251741	AX-147251741_A06	176.582	Arahy.06	13887118		b	a	b	h	a	a	a	a	a	a	b	h	b	h	a	a	b	a	b	a	a	h	a	a	b	b	a	b	b	b	a	b	a	a	b	h	a	h	b	b	a	b	a
A06	AX-176804324	AX-176804324_A06	176.691	Arahy.06	13561172		b	a	b	h	a	a	a	a	a	a	b	h	b	h	a	a	b	a	b	a	a	h	a	a	b	b	a	b	b	b	a	b	a	a	b	h	a	h	b	b	a	b	a
A06	AX-176820274	AX-176820274_A06	177.128	Arahy.06	13327950		b	a	b	h	a	a	a	a	a	a	b	h	b	h	a	a	b	a	b	a	a	h	a	a	b	b	a	b	b	h	a	b	a	a	b	h	a	h	b	b	a	b	a
A06	AX-176822031	AX-176822031_A06	177.457	Arahy.06	13043054		b	a	b	a	a	a	a	a	a	a	b	h	b	h	a	a	b	a	b	a	a	h	a	a	b	b	a	b	b	h	a	b	a	a	b	h	a	h	b	b	a	b	a
A06	AX-176799058	AX-176799058_A06	178.006	Arahy.06	12827908		b	a	b	a	a	a	a	a	a	a	b	h	b	h	a	a	b	a	b	a	a	h	a	a	b	b	a	b	b	h	a	b	a	a	b	b	a	h	b	b	a	b	a
A06	AX-176797575	AX-176797575_A06	178.224	Arahy.06	12731357		b	a	b	a	a	a	a	a	a	a	b	h	b	h	a	a	b	a	b	a	a	h	a	a	b	b	a	b	b	h	a	b	a	a	b	b	a	h	b	b	a	b	a
A06	AX-147224916	AX-147224916_A06	178.787	Arahy.06	12845908		b	a	b	a	a	a	a	a	a	a	b	b	b	-	a	a	b	a	b	a	a	h	a	a	b	b	a	b	b	h	a	b	a	a	b	b	a	h	b	b	a	b	a
A06	AX-147224915	AX-147224915_A06	179.243	Arahy.06	12845676		b	a	b	a	a	a	a	a	a	a	b	-	b	-	a	a	b	a	b	a	a	h	a	a	b	b	a	b	b	h	a	b	a	a	b	b	a	h	b	b	a	b	a
A06	AX-147224917	AX-147224917_A06	179.438	Arahy.06	12845948		b	a	b	a	a	a	a	a	a	a	-	h	b	b	a	a	b	a	b	a	a	h	a	a	b	b	a	b	b	h	a	b	a	a	b	b	a	h	b	b	a	b	a
A06	AX-147251826	AX-147251826_A06	179.765	Arahy.06	12295140		b	a	b	a	a	a	a	a	a	a	b	h	b	b	a	a	b	a	b	a	a	h	a	b	b	b	a	b	b	h	a	b	a	a	b	b	a	h	b	b	a	b	a
A06	AX-147224880	AX-147224880_A06	180.538	Arahy.06	12128928		b	a	b	a	a	a	a	a	a	a	b	h	b	b	a	a	b	a	b	a	a	h	a	b	b	b	a	b	b	h	a	b	a	a	b	b	a	h	b	b	a	b	a
A06	AX-176793958	AX-176793958_A06	182.119	Arahy.06	11500921		a	a	b	a	a	a	a	a	b	a	b	h	b	b	a	a	b	a	b	a	a	b	a	b	b	b	a	b	b	h	a	b	a	a	b	b	a	h	b	b	a	b	a
A06	AX-176803389	AX-176803389_A06	182.446	Arahy.06	11408935		a	a	b	a	a	a	a	a	b	a	b	h	b	b	a	a	b	a	b	a	a	b	a	b	b	b	a	b	b	h	a	b	a	a	b	b	a	h	b	b	a	b	a
A06	AX-176819573	AX-176819573_A06	182.446	Arahy.06	11500991		a	a	b	a	a	a	a	a	b	a	b	h	b	b	a	a	b	a	b	a	a	b	a	b	b	b	a	b	b	h	a	b	a	a	b	b	a	h	b	b	a	b	a
A06	AX-147224830	AX-147224830_A06	182.554	Arahy.06	11370610		a	a	b	a	a	a	a	a	b	a	b	h	b	b	a	a	b	a	b	a	a	b	a	b	b	b	a	b	b	h	a	b	a	a	b	b	a	h	b	b	a	b	a
A06	AX-176802390	AX-176802390_A06	182.772	Arahy.06	10858655		a	a	b	a	a	a	a	a	b	a	b	h	b	b	a	a	b	a	b	a	a	b	a	b	b	b	a	b	b	h	a	b	a	a	b	b	a	h	b	b	a	b	a
A06	AX-176807876	AX-176807876_A06	183.775	Arahy.06	10985290		a	a	b	a	a	a	a	-	b	a	b	-	b	b	a	-	b	a	b	a	h	b	a	b	b	b	a	b	b	h	-	b	a	a	b	b	a	-	b	b	h	b	a
A06	AX-176792019	AX-176792019_A06	184.664	Arahy.06	11022854		a	a	b	a	a	a	a	a	b	a	b	-	b	b	a	a	b	a	b	a	a	b	a	b	b	b	a	b	b	h	a	b	a	a	b	b	a	h	b	b	a	b	a
A06	AX-147224783	AX-147224783_A06	184.992	Arahy.06	10868573		a	a	b	a	a	a	a	a	b	a	b	h	b	b	a	a	b	a	b	a	a	b	a	b	b	b	a	b	b	h	a	b	a	a	b	b	a	h	b	b	a	b	a
A06	AX-147224760	AX-147224760_A06	185.994	Arahy.06	10431169		a	a	b	a	a	a	a	a	b	a	b	h	b	b	a	a	b	a	b	a	a	b	a	b	b	b	a	b	b	h	a	b	a	a	b	b	a	h	b	b	a	b	a
A06	AX-176804928	AX-176804928_A06	186.882	Arahy.06	10410638		a	a	b	a	a	a	a	a	b	a	b	h	b	b	a	a	b	a	b	a	a	h	a	b	b	b	a	b	b	h	a	b	a	a	b	b	a	h	b	b	h	b	a
A06	AX-176812830	AX-176812830_A06	192.419	Arahy.06	10049748		a	a	b	a	a	a	a	a	h	a	b	h	b	h	a	a	b	a	b	a	a	a	a	b	b	b	b	b	b	h	a	b	a	a	b	b	a	h	b	b	h	b	a
A06	AX-147254090	AX-147254090_A06	193.194	Arahy.06	9920672		a	a	b	a	a	a	a	a	-	a	h	h	b	h	a	a	b	a	b	a	a	a	a	b	b	b	b	b	b	h	a	b	a	a	b	b	a	a	b	b	h	b	a
A06	AX-176810966	AX-176810966_A06	193.856	Arahy.06	8620638		a	a	b	a	a	a	a	a	h	a	h	h	b	h	a	a	b	a	b	a	a	a	a	b	b	b	b	b	b	h	a	b	a	a	b	b	a	a	b	b	h	b	a
A06	AX-176797265	AX-176797265_A06	193.856	Arahy.06	8847119		a	a	b	a	a	a	a	a	h	a	h	h	b	h	a	a	b	a	b	a	a	a	a	b	b	b	b	b	b	h	a	b	a	a	b	b	a	a	b	b	h	b	a
A06	AX-147252029	AX-147252029_A06	193.964	Arahy.06	8608150		a	a	b	a	a	a	a	a	h	a	h	b	b	h	a	a	b	a	b	a	a	a	a	b	b	b	b	b	b	h	a	b	a	a	b	b	a	a	b	b	h	b	a
A06	AX-176802137	AX-176802137_A06	194.115	Arahy.06	8833382		a	a	b	a	a	a	a	a	h	a	h	-	b	h	a	-	b	a	b	a	a	a	a	b	b	b	b	b	b	-	a	b	a	a	b	b	a	a	b	b	-	b	a
A06	AX-176797063	AX-176797063_A06	200.132	Arahy.06	6753847		a	a	b	a	a	a	a	a	a	a	h	a	b	a	a	a	b	b	-	b	a	a	a	b	b	b	b	b	b	-	a	b	a	a	b	b	a	b	b	b	h	b	a
A06	AX-176793198	AX-176793198_A06	201.007	Arahy.06	6736816		a	a	b	a	a	a	a	a	a	a	h	h	b	a	a	a	b	b	a	b	a	a	a	b	b	-	b	b	b	h	a	b	a	a	b	b	a	b	b	b	h	b	a
A06	AX-176792397	AX-176792397_A06	204.903	Arahy.06	6354376		b	a	b	a	a	a	a	a	a	a	h	a	b	a	a	a	a	b	a	b	a	a	a	b	b	b	b	b	b	-	a	b	a	a	b	b	a	b	b	b	-	b	a
A06	AX-176807952	AX-176807952_A06	205.803	Arahy.06	6581230		b	a	b	a	a	a	a	a	a	a	h	a	b	a	a	a	a	b	a	b	a	a	a	b	b	b	b	b	b	h	h	b	a	a	b	b	a	b	b	b	h	b	a
A06	AX-176798972	AX-176798972_A06	206.043	Arahy.06	6606409		b	a	b	a	a	a	a	a	a	a	h	a	b	a	a	a	a	b	a	b	a	a	a	b	b	b	b	b	b	h	a	b	a	a	b	b	a	b	b	b	h	b	a
A06	AX-176794377	AX-176794377_A06	206.043	Arahy.06	6513476		b	a	b	a	a	a	a	a	a	a	h	a	b	a	a	a	a	b	a	b	a	a	a	b	b	b	b	b	b	h	a	b	a	a	b	b	a	b	b	b	h	b	a
A06	AX-176819824	AX-176819824_A06	206.93	Arahy.06	6264204		b	a	b	a	a	a	a	a	a	a	h	a	b	a	a	a	a	b	a	b	a	a	a	b	b	b	b	b	b	h	a	b	a	a	b	b	a	b	b	b	h	b	a
A06	AX-176820836	AX-176820836_A06	207.479	Arahy.06	6244427		b	a	b	a	a	a	a	a	a	a	h	a	b	a	a	a	a	b	a	b	a	a	a	b	b	b	b	b	b	h	a	b	a	a	b	b	a	b	b	b	h	b	a
A06	AX-176806473	AX-176806473_A06	207.588	Arahy.06	6246160		b	a	b	a	a	a	a	a	a	a	h	a	b	a	a	a	a	b	a	b	a	a	a	b	b	b	b	b	b	h	a	b	a	a	b	b	a	b	b	b	h	b	a
A06	AX-176797608	AX-176797608_A06	208.702	Arahy.06	6044829		b	a	b	a	a	a	a	a	a	a	h	a	b	a	a	a	a	b	a	b	a	a	a	b	b	b	a	b	b	h	a	b	a	a	b	b	a	b	b	b	h	b	a
A06	AX-176808460	AX-176808460_A06	208.811	Arahy.06	6030899		b	a	b	a	a	a	a	a	a	a	h	a	b	a	a	a	a	b	a	b	a	a	a	b	b	b	a	b	b	h	a	b	a	a	b	b	a	b	b	b	h	b	a
A06	AX-176801031	AX-176801031_A06	209.812	Arahy.06	5947181		b	a	b	a	a	a	a	a	a	a	h	a	b	a	a	a	a	b	a	b	a	a	a	b	b	b	a	b	b	h	b	b	a	a	b	b	a	b	b	b	h	b	a
A06	AX-176794702	AX-176794702_B06	211.993	Arahy.06	16304104		b	a	b	a	a	a	a	a	a	a	h	a	b	a	a	a	a	b	a	b	a	a	a	b	b	b	a	b	b	h	b	b	a	a	h	b	a	b	b	b	h	b	a
A06	AX-176816957	AX-176816957_A06	212.374	Arahy.06	5378255		b	a	b	a	a	a	a	a	a	a	h	a	b	a	a	h	a	b	a	b	a	a	a	b	b	b	a	b	b	h	b	b	a	a	h	b	a	b	b	b	h	b	a
A06	AX-176792178	AX-176792178_B06	212.759	Arahy.06	16501505		b	a	b	a	a	a	a	a	a	a	h	a	b	a	a	a	a	b	a	b	a	a	a	b	b	b	a	b	b	h	b	b	a	a	h	b	a	b	b	b	h	b	a
A06	AX-147224457	AX-147224457_B06	213.645	Arahy.06	16776433		b	a	b	a	a	a	a	a	a	a	h	a	b	a	a	a	a	b	a	b	a	b	a	b	b	b	a	b	b	h	b	b	a	a	h	b	a	b	b	b	h	b	a
A06	AX-176805104	AX-176805104_A06	213.862	Arahy.06	5270420		b	a	b	a	a	a	a	a	a	a	h	a	b	a	a	a	a	b	a	b	a	b	a	b	b	b	a	b	b	h	b	b	a	a	h	b	a	b	b	b	h	b	a
A06	AX-176817454	AX-176817454_A06	214.19	Arahy.06	5240091		b	a	b	a	a	a	a	a	a	a	h	a	b	a	a	a	a	b	a	b	a	b	a	b	b	b	a	b	b	h	b	b	a	a	h	b	a	b	b	b	h	b	a
A06	AX-147224462	AX-147224462_A06	214.297	Arahy.06	5289382		b	a	b	a	a	a	a	a	a	a	h	a	b	a	a	a	a	b	a	b	a	b	a	b	b	b	a	b	b	h	b	b	a	a	h	b	a	b	b	b	h	b	a
A06	AX-176795870	AX-176795870_A06	214.406	Arahy.06	5243978		b	a	b	a	a	a	a	a	a	a	h	a	b	a	a	a	a	b	a	b	a	b	a	b	b	b	a	b	b	h	b	b	a	a	h	b	a	b	b	b	h	b	a
A06	AX-176819950	AX-176819950_A06	214.888	Arahy.06	5244048		b	a	b	h	a	-	a	a	a	a	h	a	b	a	a	a	a	b	a	b	-	-	a	b	b	b	a	b	b	h	b	b	a	a	h	b	a	b	b	b	h	-	a
A06	AX-176808012	AX-176808012_A06	215.849	Arahy.06	5183264		b	a	b	a	a	a	a	a	a	a	h	a	b	a	a	a	a	b	a	b	a	b	a	b	b	b	a	b	b	h	b	b	a	a	h	b	a	b	b	b	h	b	a
A06	AX-147224423	AX-147224423_B06	217.018	Arahy.06	17555756		b	a	b	a	a	a	a	a	a	a	h	a	b	h	a	a	a	b	a	b	a	b	a	-	b	b	a	b	b	h	b	b	a	a	h	b	a	b	b	b	h	b	a
A06	AX-147224415	AX-147224415_A06	218.199	Arahy.06	4689689		b	a	b	a	a	a	a	a	a	a	h	a	b	h	a	a	a	b	a	b	a	b	a	h	b	b	a	b	b	h	b	b	a	a	h	b	a	b	b	b	h	b	a
A06	AX-176819770	AX-176819770_A06	218.593	Arahy.06	4642418		b	a	-	-	a	a	a	-	a	a	h	a	b	h	a	a	a	b	-	b	a	b	a	h	b	b	a	b	b	h	b	b	a	a	-	b	a	b	-	b	-	b	a
A06	AX-147224395	AX-147224395_A06	218.857	Arahy.06	4536135		b	a	b	a	a	a	a	a	a	a	h	a	b	h	a	a	a	b	a	b	a	b	a	h	b	b	a	b	b	h	b	b	a	a	h	b	a	b	b	b	h	b	a
A06	AX-147252323	AX-147252323_A06	219.184	Arahy.06	4418841		b	a	b	a	a	a	a	a	a	a	h	a	b	h	a	a	a	b	a	b	a	b	a	h	b	b	a	b	b	h	b	b	a	a	h	b	a	b	b	b	h	b	a
A06	AX-176791999	AX-176791999_B06	219.512	Arahy.06	18808077		b	a	b	a	a	a	a	a	a	a	h	a	b	h	a	a	a	b	a	b	a	b	a	h	b	b	a	b	b	h	b	b	a	a	h	b	a	b	b	b	h	b	a
A06	AX-176807861	AX-176807861_A06	220.743	Arahy.06	3926401		b	a	b	a	a	a	a	a	a	b	h	a	b	h	a	a	a	b	a	b	a	b	a	h	b	b	a	b	b	h	b	b	a	a	h	b	a	b	b	b	h	b	a
A06	AX-176810410	AX-176810410_A06	221.406	Arahy.06	3747103		b	a	b	a	a	a	a	a	a	b	h	a	b	h	a	a	a	b	a	b	a	b	a	h	b	b	a	b	b	h	b	b	a	a	a	b	a	b	b	b	h	b	a
A06	AX-176795317	AX-176795317_A06	221.956	Arahy.06	3616805		b	a	b	a	a	a	a	a	a	b	h	a	b	h	a	a	a	b	a	b	a	b	a	h	b	a	a	b	b	h	b	b	a	a	a	b	a	b	b	b	h	b	a
A06	AX-176818795	AX-176818795_A06	221.956	Arahy.06	3566722		b	a	b	a	a	a	a	a	a	b	-	a	b	h	a	a	a	b	a	b	a	b	a	h	b	a	a	b	b	h	b	b	a	a	a	b	a	b	b	b	h	b	a
A06	AX-176806439	AX-176806439_A06	221.956	Arahy.06	3622410		b	a	b	a	a	a	a	a	a	b	h	a	b	h	a	a	a	b	a	b	a	b	a	h	b	a	a	b	b	h	b	b	a	a	a	b	a	b	b	b	h	b	a
A06	AX-176806658	AX-176806658_A06	223.128	Arahy.06	3391107		b	a	b	a	a	a	a	a	a	b	h	a	b	h	a	b	a	b	a	b	a	b	a	h	b	a	a	b	b	h	b	b	a	a	a	b	a	b	b	b	h	b	a
A06	AX-176814154	AX-176814154_A06	224.044	Arahy.06	3339995		b	a	b	a	a	a	a	a	a	h	h	a	b	h	a	b	a	b	a	b	a	b	a	h	b	a	a	b	b	h	b	b	a	a	a	b	a	b	b	b	h	b	a
A06	AX-176817528	AX-176817528_A06	224.845	Arahy.06	3308624		b	a	b	a	a	a	a	a	a	h	h	a	b	h	a	b	a	b	a	b	b	b	a	h	b	a	a	b	b	h	b	b	a	a	a	b	a	b	b	b	h	b	a
A06	AX-176795697	AX-176795697_A06	225.891	Arahy.06	3161579		b	a	b	h	a	a	a	a	a	a	h	a	b	h	a	b	a	b	a	b	b	b	a	h	b	a	a	b	b	h	b	b	a	a	a	b	a	b	b	b	h	b	a
A06	AX-176796197	AX-176796197_A06	227.051	Arahy.06	2906710		b	a	b	h	a	a	a	a	a	a	h	a	b	h	a	b	a	b	a	b	b	b	a	h	b	a	a	b	b	h	b	b	a	a	a	b	a	b	b	b	h	b	a
A06	AX-176805136	AX-176805136_A06	227.385	Arahy.06	2905779		b	a	b	h	a	a	a	a	a	a	h	a	b	h	a	b	a	b	a	b	b	b	a	-	b	a	a	b	b	h	b	b	a	a	a	b	a	b	b	b	h	b	a
A06	AX-176819732	AX-176819732_A06	229.053	Arahy.06	2905709		b	a	-	h	a	a	a	a	a	a	h	a	b	a	a	h	a	b	a	b	h	b	a	h	b	a	a	b	b	a	b	b	a	a	a	b	a	b	b	-	h	b	a
A06	AX-176819596	AX-176819596_A06	231.954	Arahy.06	2906780		b	a	b	h	a	a	a	h	-	a	b	h	b	h	a	b	a	b	a	b	b	b	a	h	b	-	-	b	b	h	b	b	a	a	h	b	-	b	b	b	h	b	a
A06	AX-176823367	AX-176823367_A06	233.213	Arahy.06	2960549		b	a	b	-	a	a	a	a	a	a	h	h	b	h	a	b	a	b	a	b	b	b	a	h	b	a	a	b	b	h	b	b	a	a	a	b	a	b	b	b	h	b	a
A06	AX-176816233	AX-176816233_A06	233.436	Arahy.06	2975544		b	a	b	h	a	a	a	a	a	a	h	a	b	h	a	b	a	b	a	b	b	b	a	h	b	a	a	b	b	h	b	b	a	a	a	b	a	b	b	b	h	b	a
A06	AX-176804303	AX-176804303_A06	233.708	Arahy.06	3045385		h	a	b	h	a	a	a	a	a	a	h	a	b	h	a	-	a	b	a	b	b	b	a	-	b	a	a	b	b	h	b	b	a	a	a	b	a	b	b	b	h	b	a
A06	AX-176798773	AX-176798773_A06	234.428	Arahy.06	2831454		b	a	b	h	a	a	a	a	a	a	h	a	b	h	a	b	a	b	a	b	b	b	a	h	b	a	a	b	b	h	b	b	a	a	a	b	a	b	b	b	h	b	a
A06	AX-176821329	AX-176821329_A06	234.759	Arahy.06	2747224		b	a	b	h	a	a	a	a	a	a	h	a	b	h	a	b	a	b	a	b	b	b	a	h	b	a	a	b	b	h	b	b	a	a	a	b	a	b	b	b	h	b	a
A06	AX-176795204	AX-176795204_A06	234.976	Arahy.06	2731131		b	a	b	h	a	a	a	a	a	a	h	a	b	h	a	b	a	b	a	b	b	b	a	h	b	a	a	b	b	h	b	b	a	a	a	b	a	b	b	b	h	b	a
A06	AX-176808026	AX-176808026_A06	236.212	Arahy.06	2591051		b	a	b	b	a	a	a	a	a	a	h	a	b	a	a	b	a	b	a	b	b	b	a	h	b	a	a	b	a	h	b	b	a	a	a	b	a	b	b	b	h	b	a
A06	AX-176805070	AX-176805070_A06	236.43	Arahy.06	2596405		b	a	b	b	a	a	a	a	a	a	h	a	b	h	a	b	a	b	a	b	b	b	a	h	b	a	a	b	a	h	b	b	a	a	a	b	a	b	b	b	h	b	a
A06	AX-176805419	AX-176805419_A06	236.757	Arahy.06	2528983		b	a	b	b	a	a	a	a	a	a	-	a	b	h	a	b	a	b	a	b	b	b	a	h	b	a	a	b	a	h	b	b	a	a	a	b	a	b	b	b	h	b	a
A06	AX-176819137	AX-176819137_A06	237.417	Arahy.06	2487473		b	a	b	b	a	a	a	a	a	a	h	a	b	h	a	b	a	b	a	b	b	b	a	h	b	a	a	b	a	h	b	b	a	a	a	b	a	b	b	b	h	b	a
A06	AX-176795943	AX-176795943_A06	237.855	Arahy.06	2429677		b	a	b	b	a	a	a	a	a	a	h	a	b	h	a	b	a	b	a	b	b	b	a	h	b	a	a	b	a	h	b	b	a	a	a	b	a	b	b	b	h	b	a
A06	AX-147224249	AX-147224249_A06	237.963	Arahy.06	2462274		b	a	b	b	a	a	a	a	a	a	h	a	b	h	a	b	a	b	a	b	b	b	a	h	b	a	a	b	a	h	b	b	a	a	a	b	a	b	b	b	h	b	a
A06	AX-176811886	AX-176811886_A06	237.963	Arahy.06	2413726		b	a	b	b	a	a	a	a	a	a	h	a	b	h	a	b	a	b	a	b	b	b	a	h	b	a	a	b	a	h	b	b	a	a	a	b	a	b	b	b	h	b	a
A06	AX-176797629	AX-176797629_A06	239.504	Arahy.06	2341423		b	a	b	b	a	a	a	a	a	a	h	a	a	-	a	b	a	b	a	b	b	b	a	-	b	a	a	b	a	h	-	b	a	a	a	b	a	b	b	b	h	b	a
A06	AX-147224175	AX-147224175_A06	243.941	Arahy.06	1425874		b	a	b	b	a	b	a	a	a	a	h	a	a	h	a	b	a	b	a	b	b	b	a	h	b	a	a	b	a	b	a	b	a	a	a	b	a	b	b	b	a	b	a
A06	AX-176802969	AX-176802969_A06	244.601	Arahy.06	1488297		b	a	b	b	a	b	a	a	a	a	h	a	a	h	a	b	a	b	a	b	b	b	a	h	b	a	a	b	a	b	a	b	a	a	a	b	a	b	b	b	h	b	a
A06	AX-147224184	AX-147224184_B06	244.601	Arahy.06	25796509		b	a	b	b	a	b	a	a	a	a	h	a	a	h	a	b	a	b	a	b	b	b	a	-	b	a	a	b	a	b	a	b	a	a	a	b	a	b	b	b	h	b	a
A06	AX-147252542	AX-147252542_B06	244.601	Arahy.06	25558240		b	a	b	b	a	b	a	a	a	a	h	a	a	h	a	b	a	b	a	b	b	b	a	h	b	a	a	b	a	b	a	b	a	a	a	b	a	b	b	b	h	b	a
A07	AX-147254382	AX-147254382_B07	0	Arahy.07	1510344		b	a	a	h	h	b	b	a	b	a	a	a	a	a	b	a	-	h	b	b	b	b	a	h	b	h	b	b	a	b	a	b	a	a	b	a	b	a	b	b	b	a	-
A07	AX-147226951	AX-147226951_A07	1.801	Arahy.07	1369640		b	a	a	h	h	b	b	a	b	a	a	a	a	a	b	a	a	a	b	b	b	b	a	a	b	b	b	b	a	b	a	b	a	a	b	a	b	a	b	b	b	a	a
A07	AX-147226949	AX-147226949_A07	2.128	Arahy.07	1334869		b	a	a	h	h	b	b	a	b	a	a	a	a	a	b	a	a	a	b	b	b	b	a	a	b	b	b	b	a	b	a	b	a	a	b	a	b	a	b	b	b	a	a
A07	AX-177639855	AX-177639855_A07	2.677	Arahy.07	1201283		b	a	a	h	b	b	b	a	b	a	a	a	a	a	b	a	a	a	b	b	b	b	a	a	b	b	b	b	a	b	a	b	a	a	b	a	b	a	b	b	b	a	a
A07	AX-176807692	AX-176807692_A07	3.68	Arahy.07	1379181		b	a	a	h	h	b	b	a	b	a	a	a	a	a	b	a	a	a	b	b	b	b	a	a	b	h	b	b	a	b	a	b	a	a	b	a	b	a	b	b	b	a	a
A07	AX-147254402	AX-147254402_B07	5.623	Arahy.07	1706723		b	a	a	a	h	b	b	a	-	a	a	a	a	a	b	a	a	a	b	b	b	b	a	a	b	h	b	b	a	b	a	b	a	a	b	a	b	a	b	b	b	a	a
A07	AX-147227003	AX-147227003_A07	5.733	Arahy.07	1742195		b	a	a	a	h	b	b	a	b	a	a	a	a	a	b	a	a	a	b	b	b	b	a	a	b	h	b	b	a	-	a	b	a	a	b	a	b	a	b	b	b	a	a
A07	AX-147254450	AX-147254450_B07	8.787	Arahy.07	2210490		b	b	a	a	h	b	b	a	b	a	a	a	a	a	b	a	a	a	a	b	b	b	a	a	b	h	b	b	a	b	a	b	a	a	b	a	b	a	b	a	b	a	a
A07	AX-147254502	AX-147254502_A07	11.908	Arahy.07	2444730		b	b	a	a	h	b	b	b	b	a	a	a	b	a	b	a	b	b	a	b	b	b	a	a	b	h	b	b	a	b	a	b	a	a	b	h	b	a	b	a	b	a	a
A07	AX-176793358	AX-176793358_A07	12.847	Arahy.07	2736364		b	b	a	h	h	b	b	b	b	a	a	a	b	a	b	a	b	b	a	b	b	b	a	a	b	h	b	b	a	b	a	b	a	a	b	b	b	a	b	a	b	a	a
A07	AX-147254562	AX-147254562_A07	13.962	Arahy.07	2902553		b	b	a	h	h	b	b	b	b	a	a	a	b	a	b	a	b	b	a	b	b	b	a	a	b	h	b	b	a	b	a	b	a	a	h	b	b	a	b	a	b	a	a
A07	AX-176799914	AX-176799914_A07	14.179	Arahy.07	2863401		b	b	a	h	h	b	b	b	b	a	a	a	b	a	b	a	b	b	a	b	b	b	a	a	b	h	b	b	a	b	a	b	a	a	h	b	b	a	b	a	b	a	a
A07	AX-147254564	AX-147254564_A07	15.612	Arahy.07	2908716		b	b	a	h	-	b	b	h	h	a	a	-	b	a	b	a	b	h	a	b	b	b	a	a	b	h	b	b	a	h	a	b	a	a	-	b	b	a	-	a	b	a	a
A07	AX-177639444	AX-177639444_B07	29.398	Arahy.07	5712055		b	b	a	a	h	b	h	b	b	a	a	a	b	b	b	a	b	h	a	b	b	b	a	a	a	h	b	b	a	a	a	b	a	a	h	b	b	a	b	a	b	a	a
A07	AX-177640154	AX-177640154_B07	29.694	Arahy.07	5712234		b	b	a	a	h	b	h	b	b	a	a	a	b	b	b	a	b	h	a	b	b	b	a	a	a	-	b	b	a	a	a	b	a	a	b	b	b	a	b	a	b	a	a
A07	AX-176821327	AX-176821327_A07	30.408	Arahy.07	5410695		b	b	a	a	h	b	h	b	b	a	a	a	b	b	b	a	b	h	a	b	b	b	a	a	a	h	b	b	a	a	a	b	a	a	h	b	b	a	b	a	b	a	a
A07	AX-177639859	AX-177639859_A07	32.834	Arahy.07	5925824		b	b	a	a	b	b	h	b	b	a	a	h	b	b	b	a	b	h	a	b	b	b	a	a	a	a	b	b	a	a	b	b	a	a	h	b	b	a	a	a	b	a	a
A07	AX-147254810	AX-147254810_B07	33.052	Arahy.07	6766090		b	b	a	a	b	b	h	b	b	a	a	h	b	b	b	a	b	h	a	b	b	b	a	a	a	a	b	b	a	a	b	b	a	a	h	b	b	a	a	a	b	a	a
A07	AX-177640245	AX-177640245_A07	33.16	Arahy.07	6346728		b	b	a	a	b	b	h	b	b	a	a	h	b	b	b	a	b	h	a	b	b	b	a	a	a	a	b	b	a	a	b	b	a	a	h	b	b	a	a	a	b	a	a
A07	AX-177639517	AX-177639517_A07	34.047	Arahy.07	5743268		b	b	-	-	b	b	-	b	b	-	a	b	b	b	b	a	b	h	a	b	b	b	a	a	a	-	b	b	a	a	b	b	-	a	h	b	b	a	a	-	b	a	a
A07	AX-147254786	AX-147254786_B07	34.486	Arahy.07	6397552		b	b	a	a	b	b	h	b	b	a	a	b	b	b	b	a	b	-	a	b	b	b	a	a	a	a	b	b	a	a	b	b	a	a	h	b	b	a	a	a	b	a	a
A07	AX-147254740	AX-147254740_A07	34.734	Arahy.07	6261115		b	b	a	a	b	b	h	b	b	a	a	b	b	b	b	a	b	h	a	b	b	b	a	a	a	a	b	b	a	a	b	b	a	a	h	b	b	a	a	a	b	a	a
A07	AX-147227492	AX-147227492_A07	34.85	Arahy.07	6314365		b	b	a	a	b	b	h	b	b	a	a	b	b	b	b	a	b	h	a	b	b	b	a	a	a	a	b	b	a	a	b	b	a	a	h	b	b	a	a	a	b	a	a
A07	AX-147254843	AX-147254843_B07	35.585	Arahy.07	7177462		b	b	a	a	b	b	h	b	b	a	a	h	b	b	b	a	h	h	a	b	b	b	a	a	a	a	b	b	a	a	b	b	a	a	h	b	b	a	a	a	b	a	a
A07	AX-176824181	AX-176824181_A07	36.135	Arahy.07	6714292		b	b	b	a	b	b	h	b	b	a	a	b	b	b	b	a	h	h	a	b	b	b	a	a	a	a	b	b	a	a	b	b	a	a	h	b	b	a	a	a	b	a	a
A07	AX-176810656	AX-176810656_A07	36.136	Arahy.07	6714222		b	b	b	a	b	b	h	b	b	a	a	b	b	b	b	a	h	h	a	b	b	b	a	a	a	a	b	b	a	a	b	b	a	a	h	b	b	a	a	a	b	a	a
A07	AX-177638761	AX-177638761_A07	36.462	Arahy.07	6784815		b	b	b	a	b	b	a	b	b	a	a	b	b	b	b	a	h	h	a	b	b	b	a	a	a	a	b	b	a	a	b	b	a	a	h	b	b	a	a	a	b	a	a
A07	AX-177639697	AX-177639697_A07	36.838	Arahy.07	6847978		b	b	b	a	b	b	a	b	b	a	a	-	b	b	b	a	h	h	a	b	b	b	a	a	a	a	b	b	a	a	b	b	a	a	h	b	b	a	a	a	b	a	a
A07	AX-176822717	AX-176822717_A07	37.228	Arahy.07	6898129		b	b	b	a	b	b	a	b	b	a	a	h	b	b	b	a	h	h	a	b	b	b	a	a	a	a	b	b	a	a	b	b	a	a	h	b	b	a	a	a	b	a	a
A07	AX-177640157	AX-177640157_A07	38.808	Arahy.07	7531387		b	b	b	a	b	b	a	b	b	a	a	b	h	b	b	a	h	h	a	b	b	b	a	a	a	a	b	b	a	a	b	b	a	a	h	b	b	a	a	a	b	a	a
A07	AX-177637729	AX-177637729_A07	39.246	Arahy.07	7884126		b	b	b	a	b	b	a	b	b	a	a	b	h	b	b	a	b	h	a	b	b	b	a	a	a	a	b	b	a	a	b	b	a	a	h	b	a	a	a	a	b	a	a
A07	AX-176794367	AX-176794367_A07	40.294	Arahy.07	8172078		b	b	b	a	b	b	a	b	b	a	a	-	h	b	b	a	h	h	a	b	b	b	a	a	a	a	b	b	a	a	b	b	a	b	-	b	a	b	a	a	b	a	a
A07	AX-176809134	AX-176809134_A07	41.592	Arahy.07	8306572		b	b	b	a	b	b	a	b	b	a	a	h	h	b	b	a	h	h	a	b	b	b	a	a	a	a	b	b	a	a	b	b	a	b	h	b	a	b	a	a	b	a	a
A07	AX-176815479	AX-176815479_A07	42.253	Arahy.07	8625964		b	b	b	a	b	b	a	b	b	a	a	b	h	b	b	a	h	h	a	b	b	b	a	a	a	a	b	b	a	a	b	b	a	b	h	b	a	b	a	a	b	a	a
A07	AX-147254895	AX-147254895_A07	42.361	Arahy.07	8510376		b	b	b	a	b	b	a	b	b	a	a	b	h	b	b	a	h	h	a	b	b	b	a	a	a	a	b	b	a	a	b	b	a	b	h	b	a	b	a	a	b	a	a
A07	AX-147227613	AX-147227613_A07	42.596	Arahy.07	8698304		b	b	b	a	b	b	a	b	b	a	a	b	h	b	b	a	h	h	a	b	b	b	a	a	a	a	b	b	a	a	b	b	a	b	h	b	a	b	a	a	b	a	a
A07	AX-147254958	AX-147254958_B07	44.159	Arahy.07	10964350		b	b	b	a	b	b	a	b	b	a	a	b	b	b	b	a	h	b	a	b	b	b	a	a	a	a	b	b	a	a	b	b	a	b	-	b	a	b	a	a	b	a	a
A07	AX-176817799	AX-176817799_A07	45.274	Arahy.07	9835821		b	b	b	a	b	b	a	b	b	-	-	b	h	b	b	a	-	h	a	b	b	b	a	a	a	a	b	b	a	a	b	b	a	b	h	b	a	b	a	a	b	a	a
A07	AX-177638096	AX-177638096_A07	46.166	Arahy.07	10490300		b	b	b	a	b	b	a	b	b	a	a	h	h	b	b	a	h	h	a	b	b	b	a	a	a	a	b	b	a	a	b	b	a	b	h	b	a	b	a	a	b	a	a
A07	AX-176809754	AX-176809754_A07	47.168	Arahy.07	10825688		b	b	b	a	b	b	a	b	b	a	a	h	h	b	b	a	h	h	a	b	b	b	a	a	a	a	b	b	a	a	b	b	a	b	h	b	a	b	a	a	b	a	a
A07	AX-177639311	AX-177639311_A07	47.379	Arahy.07	10648847		b	b	b	a	b	b	a	b	b	a	a	-	h	b	b	a	h	h	a	b	b	b	a	a	a	a	b	b	a	a	b	b	a	b	h	b	a	b	a	a	b	a	a
A07	AX-176795561	AX-176795561_A07	47.385	Arahy.07	10628529		b	b	b	a	b	b	a	b	b	a	a	b	h	b	b	a	h	h	a	b	b	b	a	a	a	a	b	b	a	a	b	b	a	b	h	b	a	b	a	a	b	a	a
A07	AX-176813924	AX-176813924_A07	48.158	Arahy.07	9028170		b	b	b	a	b	b	a	b	b	a	a	b	h	b	b	a	h	h	a	b	b	b	a	a	a	a	b	b	a	a	b	b	a	b	h	b	a	b	a	a	b	a	a
A07	AX-176818203	AX-176818203_A07	48.596	Arahy.07	9775064		b	b	b	a	b	b	a	b	b	a	a	-	h	b	b	a	h	h	a	b	b	b	a	a	a	a	b	b	a	a	b	b	a	b	h	b	a	b	a	a	b	a	a
A07	AX-176818489	AX-176818489_A07	48.648	Arahy.07	9210097		b	b	b	a	b	b	a	b	b	a	a	b	h	b	b	a	h	h	a	b	b	b	a	a	a	a	-	b	a	a	b	b	a	b	h	b	a	b	a	a	b	a	a
A07	AX-147254956	AX-147254956_B07	48.704	Arahy.07	10963621		b	b	b	a	b	b	a	b	b	a	a	b	-	b	b	a	h	h	a	b	b	b	a	a	a	a	b	b	a	a	b	b	a	b	-	b	a	b	a	a	b	a	a
A07	AX-176817800	AX-176817800_A07	48.704	Arahy.07	9913262		b	b	b	a	b	b	a	b	b	a	a	b	h	b	b	a	h	h	a	b	b	b	a	-	a	a	b	b	a	a	b	b	a	b	h	b	a	b	a	a	b	a	a
A07	AX-176809141	AX-176809141_A07	48.704	Arahy.07	9438357		b	b	b	a	b	b	a	b	b	a	a	-	h	b	b	a	h	h	a	b	b	b	a	a	a	a	b	b	a	a	b	b	a	b	h	b	a	b	a	a	b	a	a
A07	AX-176793953	AX-176793953_A07	48.921	Arahy.07	9809368		b	b	b	-	b	b	a	b	b	a	a	b	h	b	b	a	h	h	a	b	b	b	a	a	a	a	b	b	a	a	b	b	a	b	h	b	a	b	a	a	b	a	a
A07	AX-176815208	AX-176815208_A07	49.139	Arahy.07	9434684		b	b	b	a	b	b	a	b	b	a	a	b	h	b	b	a	h	h	a	b	b	b	a	a	a	a	b	b	a	a	b	b	a	b	h	b	a	b	a	a	b	a	a
A07	AX-147254959	AX-147254959_B07	49.139	Arahy.07	10964541		b	b	b	a	b	b	a	b	b	a	a	-	h	b	b	a	h	h	a	b	b	b	a	a	a	a	b	b	a	a	b	b	a	b	h	b	a	b	a	a	b	a	a
A07	AX-176804719	AX-176804719_A07	49.799	Arahy.07	11024748		b	b	b	a	b	b	a	b	b	a	a	b	h	b	b	a	h	h	a	b	b	b	a	a	a	a	b	b	a	a	b	b	a	b	h	b	a	b	a	a	b	a	a
A07	AX-176811883	AX-176811883_A07	50.005	Arahy.07	10979743		b	b	b	a	b	b	a	b	b	-	a	b	h	b	b	a	h	h	a	b	b	b	a	a	a	a	b	b	a	a	b	b	a	b	h	b	a	b	a	a	b	a	a
A07	AX-177639792	AX-177639792_A07	50.022	Arahy.07	11049590		b	b	b	a	b	b	a	b	b	a	a	b	h	b	b	a	h	h	a	b	b	b	a	a	a	a	b	b	a	a	b	b	a	b	h	b	a	b	a	a	b	a	a
A07	AX-176819620	AX-176819620_A07	50.678	Arahy.07	11222859		b	b	b	a	b	b	a	b	b	a	a	b	h	b	b	a	h	h	a	b	b	b	a	a	a	a	b	b	a	a	b	b	a	b	h	b	a	b	a	a	b	a	a
A07	AX-176803785	AX-176803785_A07	50.678	Arahy.07	11222929		b	b	b	a	b	b	a	b	b	a	a	b	h	b	b	a	h	h	a	b	b	b	a	a	a	a	b	b	a	a	b	b	a	b	h	b	a	b	a	a	b	a	a
A07	AX-176814482	AX-176814482_A07	50.678	Arahy.07	11165460		b	b	b	a	b	b	a	b	b	a	a	-	h	b	b	a	h	h	a	b	b	b	a	a	a	a	b	b	a	a	b	b	a	b	h	b	a	b	a	a	b	a	a
A07	AX-176813190	AX-176813190_A07	50.896	Arahy.07	11350052		b	b	b	a	b	b	a	b	b	a	a	b	h	b	b	a	h	h	a	b	b	b	a	a	a	a	b	b	a	-	b	b	a	b	h	b	a	b	a	a	b	a	a
A07	AX-176792230	AX-176792230_A07	50.896	Arahy.07	11322710		b	b	b	a	b	b	a	b	b	a	a	b	h	b	b	a	h	h	a	b	b	b	a	a	a	a	b	b	a	a	b	b	a	b	h	b	a	b	a	a	b	a	a
A07	AX-177639042	AX-177639042_A07	51.059	Arahy.07	11288453		b	b	b	a	b	b	a	b	b	a	a	-	h	b	b	a	-	h	a	b	b	b	a	a	a	a	b	b	a	a	b	b	a	b	h	b	a	b	a	a	b	a	a
A07	AX-176812398	AX-176812398_A07	51.222	Arahy.07	11289204		b	b	b	a	b	b	a	b	b	a	a	h	h	b	b	a	h	h	a	b	b	b	a	a	a	a	b	b	a	a	b	b	a	b	h	b	a	b	a	a	b	a	a
A07	AX-176804656	AX-176804656_A07	51.979	Arahy.07	11481456		b	b	b	a	b	b	a	b	b	a	a	-	h	b	b	a	h	h	a	b	b	h	a	a	a	a	b	b	a	a	b	b	a	b	h	b	a	b	a	a	b	a	a
A07	AX-176801331	AX-176801331_A07	52.104	Arahy.07	11486174		b	b	b	a	b	b	a	b	b	a	a	b	h	b	b	a	-	h	a	b	b	h	a	a	a	a	b	b	a	a	b	b	a	b	h	b	a	b	a	a	b	a	a
A07	AX-177637883	AX-177637883_A07	52.213	Arahy.07	11478576		b	b	b	a	b	b	a	b	b	a	a	b	h	b	b	a	h	h	a	b	b	h	a	a	a	a	b	b	a	-	b	b	a	b	h	b	a	b	a	a	b	a	a
A07	AX-176815728	AX-176815728_A07	52.804	Arahy.07	11649115		b	b	b	a	b	b	a	b	b	a	a	b	h	b	b	a	h	h	a	b	b	h	a	a	a	a	b	b	a	a	b	b	a	b	h	b	a	b	a	a	b	a	a
A07	AX-176803919	AX-176803919_A07	53.089	Arahy.07	11772052		b	b	b	a	b	b	a	b	b	a	a	b	h	b	b	a	h	h	a	b	b	h	a	a	a	a	b	b	a	a	b	b	a	b	h	b	a	b	a	a	b	a	a
A07	AX-176816464	AX-176816464_A07	53.753	Arahy.07	12064185		-	b	b	a	b	b	a	b	b	a	-	b	h	-	b	a	h	a	a	b	b	-	a	a	a	a	h	b	a	a	b	b	a	b	h	b	a	b	a	h	b	a	a
A07	AX-176805927	AX-176805927_A07	54.755	Arahy.07	11906601		b	b	b	a	b	b	a	b	b	a	a	h	h	b	b	a	h	h	a	b	b	h	a	a	a	a	b	b	a	a	b	b	a	b	h	b	a	b	a	a	b	a	a
A07	AX-176807090	AX-176807090_A07	55.416	Arahy.07	12163280		b	b	b	a	b	b	a	b	b	a	a	b	h	b	b	-	-	h	a	b	b	h	a	a	a	a	b	b	a	a	b	b	a	b	h	b	a	b	a	a	b	a	a
A07	AX-177639662	AX-177639662_A07	55.431	Arahy.07	12075867		b	b	b	a	b	b	a	b	b	a	a	-	h	b	b	a	h	h	a	b	b	h	a	a	a	a	b	b	a	a	b	b	a	b	h	b	a	b	a	a	b	a	a
A07	AX-147227736	AX-147227736_A07	55.455	Arahy.07	12159808		b	b	b	a	b	b	a	b	b	a	a	-	h	b	b	a	h	h	a	b	b	h	a	a	a	a	b	b	a	a	b	b	a	b	h	b	a	b	a	a	b	a	a
A07	AX-176804203	AX-176804203_A07	55.538	Arahy.07	12173324		b	b	b	a	b	b	a	-	b	a	-	h	-	b	b	a	h	-	a	b	b	h	a	a	a	a	b	b	a	a	-	-	a	b	h	b	a	b	a	a	b	a	a
A07	AX-176805780	AX-176805780_A07	56.413	Arahy.07	12549062		b	b	b	a	b	b	a	b	b	a	a	h	h	b	b	a	h	h	a	b	b	h	a	a	a	a	b	b	a	a	b	b	a	b	b	b	a	b	a	a	b	a	a
A07	AX-176811781	AX-176811781_A07	56.413	Arahy.07	12500874		b	b	b	a	b	b	a	b	b	a	a	-	h	b	b	a	h	h	a	b	b	h	a	a	a	a	b	b	a	a	b	b	a	b	b	b	a	b	a	a	b	a	a
A07	AX-176811712	AX-176811712_A07	57.158	Arahy.07	12530648		b	b	b	a	b	-	a	b	b	a	h	b	h	b	b	a	h	h	a	b	b	h	h	a	-	a	b	b	a	a	b	b	a	b	b	b	a	b	-	a	b	a	a
A07	AX-176813122	AX-176813122_A07	58.661	Arahy.07	13568367		b	b	b	-	b	b	a	b	b	a	a	b	h	-	b	-	-	h	a	b	b	h	a	a	a	a	b	b	a	a	b	b	a	b	b	b	a	b	a	a	b	a	a
A07	AX-147227779	AX-147227779_B07	59.324	Arahy.07	14906700		b	b	b	a	b	b	a	b	b	a	a	h	h	b	b	a	h	h	a	b	b	h	a	a	a	a	b	b	a	a	b	b	a	b	b	b	a	b	a	a	b	a	a
A07	AX-176793764	AX-176793764_A07	59.938	Arahy.07	13510662		-	b	b	a	b	b	a	b	b	a	a	h	h	b	b	a	h	h	a	-	b	h	a	a	a	a	b	b	a	a	b	b	a	b	b	b	a	b	a	a	b	a	a
A07	AX-176810210	AX-176810210_A07	60.546	Arahy.07	13263076		b	b	b	a	b	b	a	b	b	a	a	h	h	b	b	a	h	h	a	b	b	h	a	a	a	a	b	b	a	a	b	b	a	b	b	b	a	b	a	a	b	a	a
A07	AX-176797952	AX-176797952_A07	60.548	Arahy.07	13230269		b	b	b	a	b	b	a	b	b	a	a	-	h	b	b	a	h	h	a	b	b	h	a	a	a	a	b	b	a	a	b	b	a	b	b	b	a	b	a	a	b	a	a
A07	AX-176794236	AX-176794236_A07	60.927	Arahy.07	13726805		b	b	b	-	b	b	a	b	b	a	a	b	h	b	b	a	-	-	a	b	b	h	a	a	-	a	b	b	-	-	b	b	a	b	b	b	a	b	-	-	b	a	a
A07	AX-176809178	AX-176809178_A07	61.428	Arahy.07	13222310		b	b	b	a	b	b	a	b	b	a	a	b	h	b	b	a	h	h	a	b	b	h	a	a	a	-	b	b	a	a	b	b	a	b	b	b	a	b	-	h	b	a	a
A07	AX-176811144	AX-176811144_A07	61.866	Arahy.07	13506979		b	b	b	a	b	b	a	b	b	a	a	b	h	b	b	a	h	h	a	b	b	h	a	a	a	a	b	b	a	a	b	b	a	b	b	b	a	b	a	a	b	a	a
A07	AX-176793479	AX-176793479_A07	61.974	Arahy.07	12781490		b	b	b	a	b	b	a	b	b	a	a	-	h	b	b	a	h	h	a	b	b	h	a	a	a	a	b	b	a	a	b	b	a	b	b	b	a	b	a	a	b	a	a
A07	AX-176800618	AX-176800618_A07	62.191	Arahy.07	14028437		b	b	b	a	b	b	a	b	b	a	a	-	b	b	b	a	h	h	a	b	b	h	a	a	a	a	b	b	a	a	b	b	a	b	b	b	a	b	a	a	b	a	a
A07	AX-176800524	AX-176800524_A07	62.191	Arahy.07	13930576		b	b	b	a	b	b	a	b	b	a	a	b	b	b	b	a	h	h	a	b	b	h	a	a	a	a	b	b	a	a	b	b	a	b	b	b	a	b	a	a	b	a	a
A07	AX-176801498	AX-176801498_A07	62.629	Arahy.07	14186670		b	b	b	a	b	b	a	b	b	a	a	b	b	b	b	a	h	h	a	b	b	h	a	a	a	a	b	b	a	a	b	b	a	b	b	b	a	b	a	a	b	a	a
A07	AX-176805519	AX-176805519_A07	63.178	Arahy.07	14281610		b	b	b	a	b	b	a	b	b	a	a	b	b	b	b	b	h	h	a	b	b	h	a	a	a	a	b	b	a	a	b	b	a	b	b	b	a	b	a	h	b	a	a
A07	AX-176807879	AX-176807879_A07	63.84	Arahy.07	14464181		b	b	b	a	b	b	a	b	b	a	-	b	b	b	b	b	h	-	a	b	b	h	a	a	a	a	b	b	a	-	b	b	a	b	b	b	a	b	a	a	b	a	a
A07	AX-176798907	AX-176798907_A07	64.508	Arahy.07	14601500		b	b	b	a	b	b	a	b	b	a	a	h	b	b	b	b	h	a	a	b	b	h	a	a	a	a	b	b	a	a	b	b	a	h	b	b	a	b	a	a	b	a	a
A07	AX-147255148	AX-147255148_B07	64.725	Arahy.07	17312087		b	b	b	a	b	b	a	b	b	a	a	h	b	b	b	-	h	h	a	b	b	h	a	a	a	a	b	b	a	a	b	b	a	h	b	b	a	b	a	a	b	a	a
A07	AX-147227844	AX-147227844_A07	64.937	Arahy.07	15031867		b	b	b	a	b	b	a	b	b	a	a	-	b	b	b	b	h	h	a	b	b	h	a	a	a	a	b	b	a	a	b	b	a	h	b	b	a	b	a	a	b	a	a
A07	AX-176792466	AX-176792466_A07	64.943	Arahy.07	14836279		b	b	b	a	b	b	a	b	b	a	a	b	b	b	b	b	h	h	a	b	b	h	a	a	a	a	b	b	a	a	b	b	a	h	b	b	a	b	a	a	b	a	a
A07	AX-176796150	AX-176796150_A07	64.945	Arahy.07	14766605		b	b	b	a	b	b	a	b	b	a	a	b	b	b	b	b	h	h	a	b	b	h	a	a	a	a	b	b	a	a	b	b	a	h	b	b	a	b	a	a	b	a	a
A07	AX-176808633	AX-176808633_A07	65.27	Arahy.07	15773103		b	b	b	a	b	b	a	b	b	a	-	b	b	b	b	b	h	h	a	b	b	h	a	a	-	a	b	b	a	a	b	b	a	h	b	b	a	b	a	a	b	a	a
A07	AX-176797417	AX-176797417_A07	65.27	Arahy.07	15659313		b	b	b	-	b	b	a	b	b	a	a	b	b	b	b	b	h	h	a	b	b	h	a	a	a	a	b	b	a	a	b	b	a	h	b	b	a	b	a	a	b	a	a
A07	AX-176812572	AX-176812572_B07	65.27	Arahy.07	18266503		b	b	b	a	b	b	a	b	b	a	a	b	b	b	b	b	h	h	a	b	b	h	a	a	a	a	b	b	a	a	b	b	a	h	b	b	a	b	a	a	b	a	a
A07	AX-176807714	AX-176807714_A07	65.378	Arahy.07	15711794		b	b	b	a	b	b	a	b	b	a	a	b	b	b	b	b	h	-	a	b	b	h	a	a	a	a	b	b	a	a	b	b	a	-	b	b	a	b	a	a	b	a	a
A07	AX-176792877	AX-176792877_A07	65.705	Arahy.07	16612636		b	b	b	a	b	b	a	b	b	a	a	b	b	b	b	b	h	h	a	h	b	h	a	a	a	a	b	b	a	a	b	b	a	h	b	b	a	b	a	a	b	a	a
A07	AX-176815225	AX-176815225_A07	66.033	Arahy.07	16873577		b	b	b	a	b	b	a	b	b	a	a	h	b	b	b	b	h	h	a	h	b	h	a	a	a	a	b	b	a	a	b	b	a	h	b	b	a	b	a	a	b	a	a
A07	AX-176817070	AX-176817070_A07	66.079	Arahy.07	16813297		b	b	b	a	b	b	a	b	b	a	a	-	b	b	b	b	h	h	a	h	b	h	a	a	a	a	b	b	a	a	b	b	a	h	b	b	a	b	a	a	b	a	a
A07	AX-176814639	AX-176814639_A07	66.142	Arahy.07	16813172		b	b	b	a	b	b	a	b	b	a	a	b	b	b	b	b	h	h	a	h	b	h	a	a	a	a	b	b	a	a	b	b	a	h	b	b	a	b	a	a	b	a	a
A07	AX-176807160	AX-176807160_A07	66.359	Arahy.07	17121392		b	b	b	a	b	b	a	b	b	a	a	b	b	b	b	b	h	h	a	h	b	h	a	a	a	a	b	b	a	a	-	b	a	h	b	b	a	b	a	a	b	a	a
A07	AX-176810756	AX-176810756_B07	66.468	Arahy.07	20595629		b	b	b	a	b	b	a	b	b	a	a	b	b	b	b	b	h	-	a	h	b	h	a	a	a	a	b	b	a	a	b	b	a	h	b	b	a	b	a	a	b	a	a
A07	AX-177644519	AX-177644519_A07	66.576	Arahy.07	17121462		b	b	b	a	b	b	a	b	b	a	a	b	b	b	b	b	-	h	a	h	b	h	a	a	a	a	b	b	a	a	b	b	a	h	b	b	a	b	a	a	b	a	a
A07	AX-176808027	AX-176808027_B07	66.616	Arahy.07	20610085		b	b	b	a	b	b	a	b	b	a	a	b	b	b	b	b	h	h	a	h	b	h	a	a	a	a	b	b	a	a	b	b	a	h	b	b	a	b	a	a	b	a	a
A07	AX-176795066	AX-176795066_B02	66.684	Arahy.07	31209123		b	-	b	a	b	b	a	b	b	a	a	b	b	b	b	b	h	h	a	h	b	h	a	a	a	a	b	b	a	a	b	b	a	h	b	b	a	b	a	a	b	a	a
A07	AX-176795602	AX-176795602_A03	66.793	Arahy.07	10175783		b	b	b	a	b	b	a	-	b	a	a	-	b	-	b	b	h	h	a	h	b	b	a	a	a	a	b	b	a	a	b	b	a	h	b	b	a	b	a	a	b	a	a
A07	AX-176800501	AX-176800501_B07	66.95	Arahy.07	20597900		b	b	b	a	b	b	a	b	b	a	a	-	b	b	b	b	h	b	a	h	b	b	a	a	a	a	-	b	a	a	b	b	a	h	b	b	a	b	a	a	b	a	a
A07	AX-176801232	AX-176801232_B07	67.186	Arahy.07	20598414		b	b	b	a	b	b	a	b	b	a	a	b	b	b	b	b	-	b	a	-	b	b	a	a	a	a	b	b	a	a	b	b	a	-	b	b	a	b	a	a	b	a	a
A07	AX-176818189	AX-176818189_B07	67.392	Arahy.07	20597765		b	b	b	a	b	b	a	b	b	a	a	-	b	b	b	-	h	-	a	b	b	b	a	a	a	a	b	b	a	a	b	b	a	b	b	b	a	b	a	a	b	a	a
A07	AX-176809999	AX-176809999_B07	68.525	Arahy.07	20461194		b	b	b	a	b	b	a	b	b	a	a	h	b	b	b	b	b	-	a	-	b	h	a	a	a	a	b	b	a	a	b	b	a	h	b	b	a	b	a	a	b	a	a
A07	AX-176799350	AX-176799350_B07	68.85	Arahy.07	20598323		b	b	b	a	b	b	a	b	b	a	a	-	b	b	b	b	-	h	a	h	b	h	a	a	a	a	b	b	a	a	b	b	a	h	b	b	a	h	a	a	b	a	a
A07	AX-147227990	AX-147227990_A07	69.788	Arahy.07	20518295		b	b	b	a	b	b	a	b	b	a	b	h	b	b	b	b	h	h	a	h	b	h	a	a	a	a	b	b	a	a	b	b	a	h	b	b	a	b	a	a	b	a	a
A07	AX-176815249	AX-176815249_A07	69.788	Arahy.07	26971209		b	b	b	a	b	b	a	b	b	a	b	h	b	b	b	b	h	h	a	h	b	h	a	a	a	a	b	b	a	a	b	b	a	h	b	b	a	b	a	a	b	a	a
A07	AX-176800397	AX-176800397_A07	69.788	Arahy.07	21153877		b	b	b	a	b	b	a	b	b	a	b	h	b	b	b	b	-	h	a	h	b	h	a	a	a	a	b	b	a	a	b	b	a	h	b	b	a	b	a	a	b	a	a
A07	AX-176814554	AX-176814554_A07	69.788	Arahy.07	22951161		b	b	b	a	b	b	a	b	b	a	b	h	b	b	b	b	h	h	a	h	b	h	a	a	a	a	b	b	a	a	b	b	a	h	b	b	a	b	a	a	b	a	a
A07	AX-176815227	AX-176815227_A07	69.792	Arahy.07	18614903		b	b	b	a	b	b	a	b	b	a	b	-	b	b	b	b	h	h	a	h	b	h	a	a	a	a	b	b	a	a	b	b	a	h	b	b	a	b	a	a	b	a	a
A07	AX-147228017	AX-147228017_A07	70.063	Arahy.07	21440999		b	b	b	a	b	b	a	b	h	a	b	b	b	b	b	b	h	h	a	h	b	h	a	a	a	a	b	b	a	a	b	b	a	h	b	b	a	b	a	a	b	a	a
A07	AX-176796114	AX-176796114_A07	70.336	Arahy.07	28328231		b	b	b	a	b	b	a	-	b	a	b	-	b	b	b	b	h	h	a	h	b	h	a	a	a	a	b	b	a	a	-	b	a	h	h	b	a	b	a	a	b	a	a
A07	AX-176808253	AX-176808253_A07	70.553	Arahy.07	32482489		b	b	b	a	b	b	a	b	b	a	b	b	b	b	b	b	h	h	a	h	b	h	a	a	a	a	b	b	a	a	b	b	a	h	b	b	a	b	a	a	b	a	a
A07	AX-147227989	AX-147227989_A07	70.662	Arahy.07	20518212		b	b	b	a	b	b	a	b	b	a	b	b	b	b	b	b	h	h	a	h	b	h	a	a	a	a	b	b	a	a	b	b	a	h	b	b	a	b	a	a	b	a	a
A07	AX-176805977	AX-176805977_A07	70.822	Arahy.07	22991463		b	b	b	a	b	b	a	b	b	a	b	b	b	b	b	b	-	h	a	h	b	h	a	a	a	a	b	b	a	a	b	b	a	h	b	b	a	b	a	a	b	a	a
A07	AX-176801553	AX-176801553_A07	71.008	Arahy.07	28750650		b	b	b	a	b	b	a	b	b	a	b	b	b	b	b	b	h	h	a	h	b	h	a	a	a	a	b	b	a	a	b	b	a	-	b	b	a	b	a	a	b	a	a
A07	AX-176809214	AX-176809214_A07	71.119	Arahy.07	19829876		b	b	b	a	b	b	a	b	b	a	b	b	b	b	b	b	h	h	a	h	b	h	a	a	a	a	b	b	a	a	b	b	a	h	b	b	a	b	a	a	b	a	a
A07	AX-176804598	AX-176804598_A07	71.557	Arahy.07	21117929		b	b	b	a	b	b	a	b	b	a	b	b	b	b	b	b	h	h	a	h	b	h	a	a	a	a	b	b	a	a	b	b	a	h	b	b	a	b	a	a	b	a	a
A07	AX-176816092	AX-176816092_B07	73.421	Arahy.07	21033207		b	b	b	a	b	b	-	b	b	a	h	b	b	-	b	b	h	h	a	h	b	-	a	a	a	a	b	b	a	-	b	b	a	-	b	b	a	b	a	a	b	a	a
A07	AX-177640043	AX-177640043_B07	74.895	Arahy.07	21030219		b	b	b	a	b	b	a	b	b	a	b	h	b	b	b	b	h	-	a	h	b	b	a	a	a	a	b	b	a	a	b	b	a	b	b	b	a	b	a	a	b	a	a
A07	AX-176792710	AX-176792710_B07	75.693	Arahy.07	21034069		b	h	b	a	-	b	a	b	b	a	b	b	b	b	b	b	h	h	a	h	b	-	a	a	a	a	b	-	a	a	b	b	a	h	b	b	a	-	a	a	b	a	a
A07	AX-176795094	AX-176795094_B07	75.861	Arahy.07	21030958		b	b	b	a	b	b	a	b	b	a	b	b	b	b	b	b	h	h	a	h	b	h	a	a	a	a	b	b	a	a	b	b	a	h	b	b	a	b	a	a	b	a	a
A07	AX-176823773	AX-176823773_B07	75.98	Arahy.07	21035314		b	b	b	a	b	b	a	b	-	a	b	b	b	b	b	b	h	h	a	h	b	h	a	a	a	a	b	b	a	a	b	b	a	h	b	b	a	b	a	a	b	a	a
A07	AX-176798777	AX-176798777_B07	76.046	Arahy.07	21034825		b	b	b	a	b	b	a	b	b	a	b	b	b	b	b	b	h	h	a	h	b	h	a	a	a	a	b	b	a	a	b	b	a	-	b	b	a	b	a	a	b	a	a
A07	AX-176797154	AX-176797154_A07	76.741	Arahy.07	17638880		b	b	b	a	b	b	a	b	b	a	b	-	b	b	b	b	h	h	a	h	b	-	a	a	a	a	b	b	a	a	b	b	a	b	b	b	a	b	a	a	b	a	a
A07	AX-176805557	AX-176805557_B07	77.442	Arahy.07	21036675		b	b	h	a	b	b	a	b	-	a	b	b	b	b	b	b	h	h	a	b	h	-	a	a	a	a	b	b	a	a	b	b	a	b	b	b	a	b	a	a	b	a	a
A07	AX-176806596	AX-176806596_B07	78.342	Arahy.07	21034927		b	b	b	a	b	b	a	b	b	a	b	b	b	b	b	b	b	-	a	b	b	b	a	a	a	a	b	b	a	a	b	b	a	h	b	b	a	b	a	a	b	a	a
A07	AX-176809363	AX-176809363_B07	79.223	Arahy.07	21032555		b	b	b	a	b	b	a	b	b	a	b	h	b	b	b	-	-	h	a	-	b	h	a	a	a	a	b	b	a	a	b	b	a	h	b	b	a	b	a	a	b	a	a
A07	AX-176800881	AX-176800881_A07	79.857	Arahy.07	17641476		b	b	b	a	b	b	a	b	b	a	b	-	-	b	b	b	h	h	a	-	b	h	a	a	a	a	b	-	a	a	b	b	a	h	b	b	a	b	a	a	b	a	a
A07	AX-176794604	AX-176794604_B07	80.054	Arahy.07	21031022		b	-	b	a	b	b	a	b	b	a	b	b	b	b	b	b	h	h	a	h	b	h	a	a	a	a	b	b	a	a	b	b	a	h	b	b	a	b	a	a	b	a	a
A07	AX-176821168	AX-176821168_B07	80.209	Arahy.07	21032118		b	b	b	a	b	b	a	b	b	a	b	b	b	b	b	b	-	h	a	h	b	h	a	a	a	a	b	b	a	a	b	b	a	h	b	b	a	b	a	a	b	a	a
A07	AX-176813375	AX-176813375_B07	80.328	Arahy.07	21033596		b	b	b	a	b	b	a	b	b	a	b	h	b	b	b	b	h	h	a	h	b	h	a	a	a	a	b	b	a	a	b	b	a	h	b	b	a	b	a	a	b	a	a
A07	AX-176807286	AX-176807286_B07	80.343	Arahy.07	21032657		b	b	b	a	b	b	a	b	b	a	b	h	b	b	b	b	h	h	a	h	b	h	a	a	a	a	b	b	a	a	-	b	a	h	-	b	a	b	a	a	b	a	a
A07	AX-177638153	AX-177638153_B07	81.036	Arahy.07	21033283		b	b	b	a	-	b	a	b	b	a	b	-	-	b	b	h	h	h	a	h	b	h	a	a	a	a	b	b	a	a	h	b	a	h	b	b	a	b	a	a	b	a	a
A07	AX-176801743	AX-176801743_B07	81.66	Arahy.07	21032731		b	b	b	a	b	b	a	-	b	a	b	b	b	b	b	-	-	h	a	h	b	h	a	a	a	a	b	b	a	a	b	b	a	-	b	b	a	b	a	a	b	a	a
A07	AX-176792529	AX-176792529_A07	82.137	Arahy.07	19604986		b	b	b	a	b	b	a	b	b	a	b	b	b	b	b	b	h	h	a	h	b	h	a	a	a	a	b	b	a	a	b	b	a	h	b	b	a	b	a	a	b	a	a
A07	AX-176803442	AX-176803442_A07	82.587	Arahy.07	17638951		b	b	b	a	b	b	a	b	b	a	b	-	b	b	b	b	h	h	a	-	b	h	a	a	a	a	b	b	a	a	b	b	a	h	b	b	a	b	a	a	b	a	a
A07	AX-176816230	AX-176816230_A07	82.851	Arahy.07	19794917		b	-	b	a	b	b	a	b	b	a	b	-	b	b	b	b	h	h	a	h	b	h	a	a	a	a	b	b	a	a	b	b	a	h	b	b	a	b	a	a	b	a	a
A07	AX-176805612	AX-176805612_A07	83.068	Arahy.07	18221997		b	b	b	a	b	b	a	b	b	a	b	b	b	b	b	b	h	h	a	h	b	h	a	a	a	a	b	b	a	a	b	b	a	h	b	b	a	b	a	a	b	a	a
A07	AX-176818629	AX-176818629_A07	83.177	Arahy.07	24637657		b	b	b	a	b	b	a	b	b	a	b	b	b	b	b	b	h	h	a	h	b	h	a	a	a	a	b	b	a	a	b	b	a	h	b	b	a	b	a	a	b	a	a
A07	AX-176812163	AX-176812163_A07	83.561	Arahy.07	25153301		b	b	b	a	b	b	a	b	b	a	b	b	b	b	b	b	h	h	a	h	b	h	a	a	-	a	b	b	a	-	b	b	-	h	b	b	-	b	a	h	b	a	a
A07	AX-176792538	AX-176792538_B04	83.946	Arahy.07	132821472		b	b	b	a	b	b	a	b	b	a	b	b	b	b	b	b	h	h	a	h	b	h	a	a	a	a	b	b	a	a	b	b	a	h	b	b	a	b	a	-	b	a	a
A07	AX-176817830	AX-176817830_A07	83.947	Arahy.07	19300857		b	b	b	a	b	b	a	b	b	a	b	b	b	b	b	b	h	h	a	h	b	h	a	a	a	a	b	b	a	a	b	b	a	h	b	b	a	b	a	a	b	a	a
A07	AX-176791859	AX-176791859_A08	83.947	Arahy.07	22613806		b	b	b	a	b	b	a	b	b	a	b	b	b	b	b	b	h	h	a	-	b	-	a	a	a	a	b	b	a	a	-	b	a	-	b	b	a	b	a	a	b	a	a
A07	AX-176817858	AX-176817858_A07	83.947	Arahy.07	24670169		b	b	b	a	b	b	a	b	b	a	b	b	b	b	b	b	h	h	a	h	b	h	a	a	a	a	b	b	a	a	b	b	a	h	b	b	a	b	a	a	b	a	a
A07	AX-176807359	AX-176807359_A07	83.955	Arahy.07	27188280		b	b	b	a	b	b	a	b	b	a	b	b	b	b	b	b	h	h	a	h	b	h	a	a	a	a	b	b	a	a	b	b	a	h	b	b	a	b	a	a	b	a	a
A07	AX-176796640	AX-176796640_B09	84.164	Arahy.07	132125343		b	b	b	a	b	b	a	b	b	a	b	b	-	b	b	b	h	h	a	h	b	h	a	a	a	a	b	b	a	a	b	b	a	h	b	b	a	b	a	a	b	a	a
A07	AX-176809960	AX-176809960_A07	84.374	Arahy.07	29324230		b	b	b	a	b	b	a	b	b	a	b	b	b	b	b	b	h	h	a	h	b	h	a	a	a	a	b	b	a	a	b	b	a	h	b	b	a	b	a	a	b	a	a
A07	AX-147255229	AX-147255229_B07	84.382	Arahy.07	21456968		b	b	b	a	b	b	a	b	b	a	b	b	b	b	b	b	-	h	a	h	b	h	a	a	a	a	b	b	a	a	b	b	a	h	b	b	a	b	a	a	b	a	a
A07	AX-176803540	AX-176803540_A07	84.519	Arahy.07	31515399		b	b	b	a	b	b	a	b	b	a	b	-	b	b	b	b	-	h	a	h	b	-	a	a	a	a	b	b	a	a	-	b	a	h	b	b	a	b	a	a	b	a	a
A07	AX-176813741	AX-176813741_A07	84.928	Arahy.07	21063033		b	b	b	a	b	b	a	b	b	a	b	b	b	b	b	b	h	-	a	h	b	a	a	a	a	a	b	b	a	a	b	b	a	h	b	b	a	b	a	a	b	a	a
A07	AX-147228048	AX-147228048_A07	85.255	Arahy.07	22174647		b	b	b	a	b	b	a	b	b	a	b	b	b	b	b	b	h	h	a	h	b	h	a	a	a	a	b	b	a	a	b	b	a	h	b	b	a	b	a	a	b	a	a
A07	AX-176815233	AX-176815233_A07	85.399	Arahy.07	20535602		b	b	b	a	b	b	a	b	b	a	b	b	b	b	b	b	h	h	a	h	b	h	a	a	a	a	b	b	a	a	b	b	a	h	b	b	a	b	a	a	b	a	a
A07	AX-177638946	AX-177638946_A07	85.692	Arahy.07	31889875		b	b	b	a	b	b	a	b	b	a	b	b	b	b	b	b	h	h	a	h	b	h	a	a	a	a	b	b	a	a	b	b	a	h	b	b	a	b	a	a	b	a	a
A07	AX-176810697	AX-176810697_A07	85.903	Arahy.07	19713080		b	b	b	a	b	b	a	b	b	a	b	b	b	b	b	b	h	h	a	h	b	h	a	a	a	a	b	b	a	a	b	b	a	h	b	b	a	b	a	a	b	a	a
A07	AX-176801118	AX-176801118_A07	85.909	Arahy.07	31402474		b	b	b	a	b	b	a	b	b	a	b	b	b	b	b	b	h	h	a	h	b	h	a	a	a	a	b	b	a	-	b	b	a	h	b	b	a	b	a	a	b	a	a
A07	AX-176815246	AX-176815246_A07	86.162	Arahy.07	22602215		b	b	b	a	b	b	a	b	b	-	b	-	b	b	b	b	h	h	a	h	b	h	a	a	a	a	b	b	a	-	b	b	a	h	b	b	-	b	a	a	b	a	a
A07	AX-177638245	AX-177638245_A07	86.938	Arahy.07	28901196		b	b	b	a	b	b	a	b	b	a	b	b	b	b	b	b	h	h	a	h	b	h	a	a	h	-	b	b	a	-	b	b	a	h	b	b	-	b	a	a	b	a	a
A07	AX-176823508	AX-176823508_A07	89.078	Arahy.07	17643060		b	b	b	a	b	b	a	b	b	a	b	b	b	b	b	b	b	b	a	b	b	b	a	-	a	a	b	b	a	-	b	b	a	b	b	b	a	b	a	a	b	a	a
A07	AX-176800791	AX-176800791_A07	89.306	Arahy.07	17641642		b	b	b	a	b	b	a	b	b	a	b	b	b	b	b	b	b	b	a	b	b	b	a	a	a	a	b	b	a	a	b	b	a	b	b	b	a	b	a	a	b	a	a
A07	AX-176801587	AX-176801587_B07	89.576	Arahy.07	21034855		b	b	b	a	b	b	a	b	b	a	b	b	b	b	b	b	b	b	a	b	b	b	a	a	a	a	b	b	a	a	b	b	a	b	b	b	a	b	a	h	b	a	a
A07	AX-177644513	AX-177644513_A07	89.851	Arahy.07	17640599		b	b	b	a	b	b	a	b	b	a	b	b	b	b	b	b	b	b	a	b	b	b	a	a	a	a	b	b	a	a	b	b	a	b	b	b	a	b	a	a	b	a	a
A07	AX-176811945	AX-176811945_B07	89.909	Arahy.07	21035817		b	b	b	a	b	b	a	b	b	a	b	b	b	b	b	b	b	b	a	b	b	b	a	a	a	a	b	b	a	a	b	b	a	b	b	b	a	b	a	a	b	a	a
A07	AX-177637220	AX-177637220_B07	89.959	Arahy.07	21031332		b	b	b	a	b	b	a	b	b	a	b	b	b	b	b	b	b	b	a	b	b	b	a	a	a	a	b	b	a	a	b	b	a	b	b	b	a	b	a	a	b	a	a
A07	AX-176796562	AX-176796562_B07	89.959	Arahy.07	21035551		b	b	b	a	b	b	a	b	b	a	b	b	b	b	b	b	b	b	a	b	b	b	a	a	a	a	b	b	a	a	b	b	a	b	b	b	a	b	a	a	b	a	a
A07	AX-176801193	AX-176801193_B07	89.959	Arahy.07	21034947		b	b	b	a	b	b	a	b	b	a	b	b	b	b	b	b	b	b	a	b	b	b	a	a	a	a	b	b	a	a	b	b	a	b	b	b	a	b	a	a	b	a	a
A07	AX-176801360	AX-176801360_B07	89.959	Arahy.07	21031719		b	b	b	a	b	b	a	b	b	a	b	b	b	b	b	b	b	b	a	b	b	b	a	a	a	a	b	b	a	a	b	b	a	b	b	b	a	b	a	a	b	a	a
A07	AX-177637302	AX-177637302_B07	90.004	Arahy.07	21031946		b	b	b	a	b	b	a	b	b	a	b	b	b	b	b	b	b	b	a	b	b	b	a	a	a	a	b	b	a	a	b	b	a	b	b	b	a	b	a	a	b	a	a
A07	AX-176797040	AX-176797040_A07	90.067	Arahy.07	17639868		b	b	b	a	b	b	a	b	b	a	b	b	b	b	b	b	b	b	a	b	b	b	a	a	a	a	b	b	a	a	b	b	a	b	b	b	a	b	a	a	b	a	a
A07	AX-176809341	AX-176809341_B07	90.072	Arahy.07	21034690		b	b	b	a	b	b	a	b	b	a	b	b	b	b	b	b	b	b	a	b	b	b	a	a	a	a	b	b	a	a	b	b	a	b	b	b	a	b	a	a	b	a	a
A07	AX-176812952	AX-176812952_B07	90.286	Arahy.07	21036029		b	b	b	a	b	b	a	-	b	a	b	b	b	b	b	b	-	b	a	b	b	b	a	a	a	a	b	b	a	a	b	b	a	b	b	b	a	b	a	a	b	a	a
A07	AX-177638176	AX-177638176_B07	90.573	Arahy.07	29206409		b	b	b	a	b	b	a	b	b	a	b	b	b	b	b	b	-	h	a	-	b	-	a	a	a	a	b	b	a	a	b	b	a	b	b	b	a	b	a	a	b	a	a
A07	AX-177638957	AX-177638957_B07	91.083	Arahy.07	21034292		b	b	b	a	b	b	a	b	b	a	b	b	b	b	b	b	b	h	a	b	b	h	a	a	a	a	b	b	a	a	b	b	a	b	b	b	a	b	a	a	b	a	a
A07	AX-176803761	AX-176803761_A07	92.298	Arahy.07	35074269		b	b	b	a	b	b	a	b	b	a	b	b	b	b	b	b	-	h	a	b	b	b	a	a	a	a	b	b	a	a	b	b	a	h	b	b	a	b	a	a	b	a	a
A07	AX-176796799	AX-176796799_A07	93.295	Arahy.07	34592460		b	b	b	a	b	b	a	b	b	a	b	h	b	b	b	b	h	h	-	b	b	b	a	a	a	a	b	b	a	a	b	b	a	h	b	b	a	b	a	h	b	a	a
A07	AX-176799889	AX-176799889_A07	94.689	Arahy.07	44990386		b	b	b	a	b	b	a	b	b	a	b	b	b	b	b	b	h	-	-	b	b	b	b	a	h	a	b	b	a	a	b	b	h	h	b	b	a	b	-	a	b	a	-
A07	AX-176815668	AX-176815668_A07	95.09	Arahy.07	41100697		b	b	b	a	b	b	a	b	b	a	b	b	b	b	b	b	-	h	a	b	b	b	b	a	a	a	b	b	a	a	b	b	a	h	b	b	a	b	-	a	b	a	a
A07	AX-176803260	AX-176803260_A07	95.198	Arahy.07	41138112		b	b	b	a	b	b	a	b	b	a	b	b	b	b	b	b	h	h	a	b	b	b	b	a	a	a	b	b	a	a	b	b	a	h	b	b	a	b	a	a	b	a	a
A07	AX-176817932	AX-176817932_A07	95.416	Arahy.07	40965539		b	b	b	a	b	b	a	b	b	a	b	b	b	b	b	b	h	h	a	b	b	b	b	a	a	a	b	b	a	a	b	b	a	h	b	b	a	b	a	a	b	a	a
A07	AX-176808535	AX-176808535_A07	95.656	Arahy.07	40904642		b	b	b	a	b	b	a	b	b	a	b	b	b	b	b	b	h	h	a	b	b	b	b	a	a	a	b	b	a	a	b	b	a	h	b	b	a	b	a	a	b	a	a
A07	AX-176817833	AX-176817833_A07	96.747	Arahy.07	47310328		b	b	-	a	b	b	a	h	b	a	b	b	-	b	b	b	h	h	a	-	-	b	-	a	a	a	b	b	a	a	b	b	a	h	b	b	a	-	a	a	b	a	a
A07	AX-176815269	AX-176815269_A07	97.52	Arahy.07	47135602		b	b	b	a	b	b	a	b	b	a	b	b	b	b	b	b	h	h	a	b	b	b	b	a	a	a	b	b	a	a	b	b	a	h	b	b	a	b	a	a	b	a	a
A07	AX-176820517	AX-176820517_A07	97.628	Arahy.07	47399084		b	b	b	a	b	b	a	b	b	a	b	b	b	b	b	b	h	h	a	b	b	b	b	a	a	a	b	b	a	a	b	b	a	h	b	b	a	b	a	a	b	a	a
A07	AX-176801387	AX-176801387_A07	97.736	Arahy.07	46896819		b	b	b	a	b	b	a	b	b	a	b	b	b	b	b	b	h	h	a	b	b	b	b	a	a	a	b	b	a	a	b	b	a	h	b	b	a	b	a	a	b	a	a
A07	AX-176817947	AX-176817947_A07	97.743	Arahy.07	47381373		b	b	b	a	b	b	a	b	b	a	b	-	b	b	b	b	h	h	a	b	b	b	b	a	a	a	b	b	a	a	b	b	a	h	b	b	a	b	a	a	b	a	a
A07	AX-176811906	AX-176811906_A07	97.748	Arahy.07	46992261		b	b	b	a	b	b	a	b	b	a	b	-	b	b	b	b	h	h	a	b	b	b	b	a	a	a	b	b	a	a	b	b	a	h	b	b	a	b	a	a	b	a	a
A07	AX-176802722	AX-176802722_A07	97.954	Arahy.07	48248161		b	b	b	a	b	b	a	b	b	a	b	h	b	b	b	b	h	h	a	b	b	b	b	a	a	a	b	b	a	a	b	b	a	h	b	b	a	b	a	a	b	a	a
A07	AX-176807670	AX-176807670_A07	98.003	Arahy.07	48106031		b	b	b	a	b	b	a	b	b	a	b	-	b	b	b	b	h	h	a	b	b	b	b	a	a	a	b	b	a	a	b	b	a	h	b	b	a	b	a	a	b	a	a
A07	AX-176808570	AX-176808570_A07	98.062	Arahy.07	48642237		b	b	b	a	b	b	a	b	b	a	b	b	b	b	b	b	h	h	a	b	b	b	b	a	a	a	b	b	a	a	b	b	a	h	b	b	a	b	a	a	b	a	a
A07	AX-176817940	AX-176817940_A07	98.279	Arahy.07	48579356		b	b	b	a	b	b	a	b	b	a	b	b	b	b	b	b	-	h	a	b	b	b	b	a	a	a	b	b	a	a	b	b	a	h	b	b	a	b	a	a	b	a	a
A07	AX-176817941	AX-176817941_A07	98.607	Arahy.07	48745770		b	b	b	a	b	b	a	b	b	a	b	b	b	b	b	b	h	h	a	b	b	b	b	a	a	a	b	b	a	a	b	b	a	h	b	b	a	b	a	a	b	a	a
A07	AX-176793421	AX-176793421_A07	98.745	Arahy.07	52187514		b	b	b	a	b	b	a	b	b	a	b	b	b	b	b	b	h	h	a	b	b	b	b	a	a	a	b	b	a	a	b	b	a	h	b	b	a	b	a	a	b	a	a
A07	AX-176802597	AX-176802597_A07	99.123	Arahy.07	51841629		b	b	b	a	b	b	a	b	b	a	b	-	b	b	b	b	h	h	a	b	b	b	b	a	a	a	b	b	a	a	b	b	a	h	b	b	a	b	a	a	b	a	a
A07	AX-176793385	AX-176793385_A07	99.261	Arahy.07	50695091		b	b	b	a	b	b	a	b	b	a	b	h	b	b	b	b	h	h	a	b	b	b	b	a	a	a	b	b	a	a	b	b	a	h	b	b	a	b	a	a	b	a	a
A07	AX-177637849	AX-177637849_A07	99.37	Arahy.07	49019989		b	b	b	a	b	b	a	b	b	a	b	h	b	b	b	b	h	h	a	b	b	b	b	a	a	a	b	b	a	a	b	b	a	h	b	b	a	b	a	a	b	a	a
A07	AX-177637253	AX-177637253_A07	99.478	Arahy.07	48845016		b	b	b	a	b	b	a	b	b	a	b	h	b	b	b	b	h	h	a	b	b	b	b	a	a	a	b	b	a	a	b	b	a	h	b	b	a	b	a	a	b	a	a
A07	AX-147258683	AX-147258683_B08	99.586	Arahy.07	110511283		b	b	b	a	b	b	a	b	b	a	b	h	b	b	b	b	h	h	a	b	b	b	b	a	a	a	b	b	a	a	b	b	a	h	b	b	a	b	a	a	b	a	a
A07	AX-176794936	AX-176794936_A07	99.695	Arahy.07	50937753		b	b	b	a	b	b	a	b	b	a	b	h	b	b	b	b	h	h	a	b	b	b	b	a	a	a	b	b	a	a	b	b	a	h	b	b	a	b	a	a	b	a	a
A07	AX-147258679	AX-147258679_A07	99.736	Arahy.07	51881813		b	b	b	a	b	b	a	b	b	a	b	-	b	b	b	b	h	h	a	b	b	b	b	a	a	a	b	b	a	a	b	b	a	h	b	b	a	b	a	a	b	a	a
A07	AX-147228434	AX-147228434_A07	99.98	Arahy.07	52276428		b	b	b	a	b	b	a	b	b	a	b	b	b	b	b	b	h	h	a	b	b	b	b	a	a	a	b	b	a	a	b	b	a	h	b	b	a	b	a	a	b	a	a
A07	AX-177642690	AX-177642690_A07	100.129	Arahy.07	48841405		b	b	b	a	b	b	a	b	b	a	b	-	b	b	b	b	h	h	a	b	b	b	b	a	a	a	b	b	a	a	b	b	a	h	b	b	a	b	a	a	b	a	a
A07	AX-176805805	AX-176805805_A07	100.238	Arahy.07	51450473		b	b	b	a	b	b	a	b	b	a	b	b	b	b	b	b	h	h	a	b	b	b	b	a	a	a	b	b	a	a	b	b	a	h	b	b	a	b	a	a	b	a	a
A07	AX-176804998	AX-176804998_A07	100.238	Arahy.07	49032107		b	b	b	a	b	b	a	b	b	a	b	b	b	b	b	b	h	h	a	b	b	b	b	a	a	a	b	b	a	a	b	b	a	h	b	b	a	b	a	a	b	a	a
A07	AX-147258677	AX-147258677_B08	100.238	Arahy.07	110525235		b	b	b	a	b	b	a	b	b	a	b	b	b	b	b	b	h	h	a	b	b	b	b	a	a	a	b	b	a	a	b	b	a	h	b	b	a	b	a	a	b	a	a
A07	AX-176815270	AX-176815270_A07	100.346	Arahy.07	48971905		b	b	b	a	b	b	a	b	b	a	b	b	b	b	b	b	b	h	a	b	b	b	b	a	a	a	b	b	a	a	b	b	a	h	b	b	a	b	a	a	b	a	a
A07	AX-177644438	AX-177644438_B09	100.702	Arahy.07	142599334		b	b	b	a	b	b	a	b	b	a	b	b	b	b	b	b	b	b	a	b	b	b	b	a	a	a	b	b	a	a	b	b	a	b	b	b	a	b	a	a	b	a	a
A07	AX-176821998	AX-176821998_B09	101.788	Arahy.07	142602308		b	b	b	a	b	b	a	b	b	a	b	b	b	b	b	b	b	b	a	b	b	b	b	a	a	a	b	b	a	a	b	b	a	b	b	b	a	b	a	a	b	a	a
A07	AX-176804890	AX-176804890_A07	103.065	Arahy.07	46992846		b	b	b	a	b	b	a	b	b	a	-	-	b	b	b	b	h	-	a	b	b	b	b	a	a	a	b	b	a	a	-	b	a	h	b	b	a	b	a	a	b	a	a
A07	AX-176813498	AX-176813498_A07	105.097	Arahy.07	42024871		b	b	b	a	b	b	a	b	b	a	b	b	b	b	b	b	h	h	a	b	b	b	b	a	a	a	b	b	a	a	b	b	a	h	b	b	a	b	a	a	b	a	a
A07	AX-176797133	AX-176797133_A07	106.571	Arahy.07	44270666		b	b	b	a	b	b	a	b	b	a	b	b	b	b	b	b	h	h	a	b	b	b	b	a	a	a	b	b	a	a	b	b	a	h	b	b	a	b	a	a	b	a	a
A07	AX-176798062	AX-176798062_A07	106.571	Arahy.07	44487592		b	b	b	a	b	b	a	b	b	a	b	b	b	b	b	b	h	h	a	b	b	b	b	a	a	a	b	b	a	a	b	b	a	h	b	b	a	b	a	a	b	a	a
A07	AX-176795199	AX-176795199_A07	106.571	Arahy.07	41693801		b	b	b	a	b	b	a	b	b	a	b	b	b	b	b	b	h	h	a	b	b	b	b	a	a	a	b	b	a	a	b	-	a	h	b	b	a	b	a	a	b	a	a
A07	AX-147228341	AX-147228341_A07	106.571	Arahy.07	43031090		b	b	b	a	b	b	a	b	b	a	b	b	b	b	b	b	h	h	a	b	b	b	b	a	a	a	b	b	a	a	b	b	a	h	b	b	a	b	a	a	b	a	a
A07	AX-176817934	AX-176817934_A07	106.573	Arahy.07	39916222		b	b	b	a	b	b	a	b	b	a	b	-	b	b	b	b	h	h	a	b	b	b	b	a	a	a	b	b	a	a	b	b	a	h	b	b	a	b	a	a	b	a	a
A07	AX-176817933	AX-176817933_A07	106.738	Arahy.07	42946326		b	h	b	a	b	b	a	b	b	a	-	-	b	b	b	b	h	h	a	b	b	b	b	a	a	a	b	-	a	a	b	b	a	h	b	b	a	b	a	a	b	a	a
A07	AX-176800505	AX-176800505_A07	106.897	Arahy.07	44485081		b	b	b	a	b	b	a	b	b	a	b	h	b	b	b	b	h	h	a	b	b	b	b	a	a	a	b	b	a	a	b	b	a	h	b	b	a	b	a	a	b	a	a
A07	AX-176797692	AX-176797692_A07	107.114	Arahy.07	45347042		b	b	b	a	b	b	a	b	b	a	b	h	b	b	b	b	h	h	a	b	b	b	b	a	a	a	b	b	a	a	b	b	a	h	b	b	a	b	a	a	b	a	a
A07	AX-176795020	AX-176795020_A07	107.441	Arahy.07	45056300		b	b	b	a	b	b	a	b	b	a	b	h	b	b	b	b	h	h	a	b	b	b	b	a	a	a	b	b	a	a	b	b	a	h	b	b	a	b	a	a	b	a	a
A07	AX-177638242	AX-177638242_A07	107.833	Arahy.07	37374430		b	b	b	a	b	b	a	b	b	a	b	-	b	b	b	b	h	h	a	b	b	b	a	a	a	a	b	b	a	a	b	b	a	h	b	b	a	b	a	a	b	a	a
A07	AX-176799489	AX-176799489_A07	108.097	Arahy.07	35784057		b	b	b	a	b	b	a	b	b	a	b	-	b	b	b	b	h	h	a	b	b	b	a	a	a	a	b	b	a	a	b	b	a	h	b	b	a	b	a	a	b	a	a
A07	AX-176794336	AX-176794336_A07	108.097	Arahy.07	32854715		b	b	b	a	b	b	a	b	b	a	b	b	b	b	b	b	-	h	a	b	b	b	a	a	a	a	b	b	a	a	-	b	a	h	b	b	a	b	a	a	b	a	a
A07	AX-176799919	AX-176799919_A07	108.097	Arahy.07	34948647		b	b	b	a	b	b	a	b	b	a	b	-	b	b	b	b	h	h	a	b	b	b	a	a	a	a	b	b	a	a	b	b	a	h	b	b	a	b	a	a	b	a	a
A07	AX-176819872	AX-176819872_A07	108.097	Arahy.07	34720866		b	b	b	a	b	b	a	b	b	a	b	b	b	b	b	b	h	h	a	b	b	b	a	a	a	a	b	b	a	a	b	b	a	h	b	b	a	b	a	a	b	a	a
A07	AX-176807964	AX-176807964_A07	108.205	Arahy.07	36933254		b	b	b	a	b	b	a	b	b	a	b	b	b	b	b	b	h	a	a	b	b	b	a	a	a	a	b	b	a	a	b	b	a	h	b	b	a	b	a	a	b	a	a
A07	AX-176807024	AX-176807024_A07	108.314	Arahy.07	34719935		b	b	b	a	b	b	a	b	b	a	b	-	b	b	b	b	h	h	a	b	b	b	a	a	a	a	b	b	a	a	b	b	a	h	b	b	a	b	a	a	b	a	a
A07	AX-176814469	AX-176814469_A07	108.422	Arahy.07	34720936		-	b	b	a	-	b	a	b	b	a	b	-	b	b	b	-	h	h	a	-	b	b	a	a	a	a	b	b	a	a	b	b	a	h	b	b	a	b	a	a	b	a	a
A07	AX-176798558	AX-176798558_A07	108.531	Arahy.07	33822886		b	b	b	a	b	b	a	b	b	a	b	b	b	b	b	b	h	h	a	b	b	b	a	a	a	a	b	b	a	a	b	b	a	h	b	b	a	b	a	a	b	a	a
A07	AX-176797452	AX-176797452_A07	108.748	Arahy.07	33077368		b	b	b	a	b	b	a	b	b	a	b	b	b	b	b	b	h	h	a	b	b	b	a	a	a	a	b	b	a	a	b	b	a	-	b	b	a	b	a	a	b	a	a
A07	AX-176818058	AX-176818058_A07	109.075	Arahy.07	32764412		b	b	b	a	b	b	a	b	b	a	b	b	b	b	b	b	h	h	a	b	b	b	a	a	a	a	b	b	a	a	b	b	a	h	b	b	a	b	a	a	b	a	a
A07	AX-147228228	AX-147228228_A07	109.345	Arahy.07	32750581		b	b	b	a	b	b	a	b	b	a	b	-	b	b	b	b	h	h	a	h	b	h	a	a	a	a	b	b	a	-	b	b	a	h	b	b	-	b	a	a	b	a	a
A07	AX-176804977	AX-176804977_A07	109.62	Arahy.07	18488378		b	b	b	a	b	b	a	b	b	a	b	h	b	b	b	b	h	h	a	h	b	h	a	a	a	a	b	b	a	a	b	b	a	h	b	b	a	b	a	a	b	a	a
A07	AX-176798715	AX-176798715_A07	109.62	Arahy.07	27296251		b	b	b	a	b	b	a	b	b	a	b	h	b	b	b	b	h	h	a	h	b	-	a	a	a	a	b	b	a	a	b	b	a	h	b	b	a	b	a	a	b	a	a
A07	AX-176812956	AX-176812956_A07	109.622	Arahy.07	22457776		b	b	b	a	b	b	a	b	b	a	b	-	b	b	b	b	h	h	a	h	b	h	a	a	a	a	b	b	a	a	b	b	a	h	b	b	a	b	a	a	b	a	a
A07	AX-177639245	AX-177639245_A07	109.957	Arahy.07	25947156		b	b	b	a	b	b	a	b	b	a	b	h	b	b	b	b	-	h	a	h	b	h	a	a	a	a	b	b	a	a	b	b	a	h	b	b	-	b	a	a	b	a	a
A07	AX-176815250	AX-176815250_A07	110.631	Arahy.07	25781339		b	h	b	a	b	b	a	b	b	a	b	h	h	b	b	-	-	-	a	-	b	h	a	a	a	a	b	b	a	a	b	b	a	h	b	b	a	-	a	a	b	a	a
A07	AX-177644508	AX-177644508_B07	112.857	Arahy.07	21032386		b	h	-	a	h	b	a	h	b	a	b	h	-	b	b	-	-	b	a	b	b	-	a	a	a	a	h	b	a	a	h	b	a	-	b	b	a	b	a	a	b	a	a
A07	AX-176817827	AX-176817827_B09	116.762	Arahy.07	93694763		b	-	b	a	h	b	a	-	b	a	-	-	-	b	h	h	h	h	a	h	b	h	a	a	a	a	b	b	a	a	-	b	a	h	b	-	a	h	a	a	b	a	a
A07	AX-176818658	AX-176818658_B08	121.275	Arahy.07	114321309		b	b	-	a	b	-	a	-	h	a	a	b	b	b	b	b	h	h	a	-	-	h	a	a	a	a	b	b	a	a	b	b	a	-	b	b	a	b	a	a	b	a	a
A07	AX-176816055	AX-176816055_A07	126.356	Arahy.07	35975054		b	b	b	a	b	b	a	b	b	-	b	b	b	b	b	b	h	h	-	b	b	b	a	a	a	a	b	b	a	-	b	b	-	-	b	b	a	b	h	a	b	a	a
A07	AX-176820999	AX-176820999_A07	128.554	Arahy.07	35964320		b	b	b	a	b	b	a	b	b	a	b	b	b	b	b	b	h	h	-	b	b	b	a	a	a	a	b	b	h	a	b	b	a	h	b	b	a	b	a	a	b	a	a
A07	AX-176809445	AX-176809445_A07	131.333	Arahy.07	52198632		b	b	b	-	b	b	a	b	b	a	b	h	b	b	b	b	h	h	a	b	b	b	b	a	a	a	b	b	a	a	b	b	a	h	b	b	a	b	a	a	b	a	a
A07	AX-147228429	AX-147228429_A07	133.502	Arahy.07	52183035		b	b	b	a	b	b	a	b	b	a	h	-	-	b	b	b	h	-	a	b	b	b	-	a	a	a	b	b	a	a	-	b	a	h	b	b	a	b	a	a	b	a	a
A07	AX-147228349	AX-147228349_A07	134.426	Arahy.07	51154789		-	b	b	a	b	b	a	b	b	a	b	b	b	b	b	h	h	h	a	b	b	b	b	a	a	a	b	b	a	a	b	b	a	-	b	b	a	b	a	a	b	a	a
A07	AX-176812224	AX-176812224_A07	135.015	Arahy.07	52398661		b	b	b	a	b	b	a	b	b	a	b	-	b	b	b	b	h	h	a	b	b	b	b	a	a	a	b	b	a	a	b	b	a	h	b	b	a	b	a	a	b	a	a
A07	AX-176815271	AX-176815271_A07	135.239	Arahy.07	53275100		b	b	b	a	b	b	a	b	b	a	b	-	b	b	b	b	h	h	a	b	b	b	b	a	a	a	b	b	a	a	b	b	a	h	b	b	a	b	a	a	b	a	a
A07	AX-176806100	AX-176806100_A07	135.45	Arahy.07	53450690		b	b	b	a	b	b	a	b	b	a	b	b	b	b	b	b	h	h	a	b	b	b	b	a	a	a	b	b	a	a	b	b	a	h	b	b	a	b	a	a	b	a	a
A07	AX-177639765	AX-177639765_A07	135.5	Arahy.07	52736415		b	b	b	a	b	b	a	b	b	a	b	-	b	b	b	b	h	h	a	b	b	b	b	a	a	a	b	b	a	a	b	b	a	h	b	b	a	b	a	a	b	a	a
A07	AX-176819976	AX-176819976_A07	135.558	Arahy.07	52939736		b	b	b	a	b	b	a	b	b	a	b	h	b	b	b	b	h	h	a	b	b	b	b	a	a	a	b	b	a	a	b	b	a	h	b	b	a	b	a	a	b	a	a
A07	AX-176804668	AX-176804668_A07	135.558	Arahy.07	52939666		b	b	b	a	b	b	a	b	b	a	b	h	b	b	b	b	h	h	a	b	b	b	b	a	a	a	b	b	a	a	b	b	a	h	b	b	a	b	a	a	b	a	a
A07	AX-177640050	AX-177640050_A07	136.561	Arahy.07	56138804		b	b	b	a	b	b	a	b	b	a	b	h	b	b	b	b	h	h	a	b	b	b	b	a	a	-	b	b	a	a	b	b	a	h	b	b	a	b	a	a	b	a	a
A07	AX-176824165	AX-176824165_A07	140.398	Arahy.07	64425111		b	a	a	a	b	b	a	b	b	a	b	h	b	b	b	b	h	h	a	b	b	b	b	a	a	a	b	b	a	a	b	b	a	h	b	b	a	b	a	a	b	a	a
A07	AX-176795735	AX-176795735_A07	140.398	Arahy.07	64425041		b	a	a	a	b	b	a	b	b	a	b	h	b	b	b	b	h	h	a	b	b	b	b	a	a	a	b	b	a	a	b	b	a	h	b	b	a	b	a	a	b	a	a
A07	AX-177639852	AX-177639852_A07	141.62	Arahy.07	67029794		b	a	a	a	b	b	a	b	b	a	b	-	b	b	b	b	h	b	a	b	b	b	b	a	a	a	b	b	a	a	b	h	a	h	b	b	a	b	a	a	b	a	a
A07	AX-177639336	AX-177639336_A07	141.736	Arahy.07	67277264		b	a	a	a	b	b	a	b	b	a	b	a	b	b	b	b	h	b	a	b	b	b	b	a	a	a	b	b	a	a	b	h	a	h	b	b	a	b	a	a	b	a	a
A07	AX-177637281	AX-177637281_A07	141.845	Arahy.07	67071196		b	a	a	a	b	b	a	b	b	a	b	a	b	b	b	b	h	b	a	b	b	b	b	a	a	a	b	b	a	a	b	h	a	h	b	b	a	b	a	a	b	a	a
A07	AX-176793854	AX-176793854_A07	142.062	Arahy.07	67039524		b	a	a	a	b	b	a	b	b	a	b	h	b	b	b	b	h	b	a	b	b	b	b	a	a	a	b	b	a	a	b	h	a	h	b	b	a	b	a	a	b	a	a
A07	AX-177644536	AX-177644536_A07	142.062	Arahy.07	67039594		b	a	a	a	b	b	a	b	b	a	b	h	b	b	b	b	h	b	a	b	b	b	b	a	a	a	b	b	a	a	b	h	a	h	b	b	a	b	a	a	b	a	a
A07	AX-177638726	AX-177638726_A07	142.171	Arahy.07	67312115		b	a	a	a	b	b	a	b	b	a	b	h	b	b	b	b	h	b	a	b	b	b	b	a	a	a	b	b	a	a	b	h	a	h	b	b	a	b	a	a	b	a	a
A07	AX-176802741	AX-176802741_A07	142.279	Arahy.07	67476015		b	a	a	a	b	b	a	b	b	a	b	h	b	b	b	b	h	b	a	b	b	b	b	a	a	a	b	b	a	a	b	h	a	h	b	b	a	b	a	-	b	a	a
A07	AX-177638432	AX-177638432_A07	142.717	Arahy.07	67798012		b	a	a	a	b	b	a	b	b	a	b	h	b	b	b	b	h	b	a	b	b	b	b	a	a	a	b	b	a	a	b	h	a	h	b	b	a	b	a	a	b	a	a
A07	AX-177638080	AX-177638080_A07	142.825	Arahy.07	67691296		b	a	a	a	b	b	a	b	b	a	b	h	b	b	b	b	h	b	a	b	b	b	b	a	a	a	b	b	a	a	b	h	a	h	b	b	a	b	a	a	b	a	a
A07	AX-176821055	AX-176821055_A07	142.825	Arahy.07	67797942		b	a	a	a	b	b	a	b	b	a	b	h	b	b	b	b	h	b	a	b	b	b	b	a	a	a	b	b	a	a	b	h	a	h	b	b	a	b	a	a	b	a	a
A07	AX-147255535	AX-147255535_B07	142.948	Arahy.07	34695399		b	a	a	a	b	b	a	b	b	a	b	h	b	b	b	b	h	b	a	b	b	b	b	a	a	a	b	b	a	a	b	b	a	h	b	b	a	b	a	a	b	a	a
A07	AX-176819366	AX-176819366_A07	143.933	Arahy.07	68506354		b	a	a	a	b	b	a	b	b	a	b	-	b	b	b	b	h	b	a	b	b	b	b	a	a	a	b	b	a	a	b	h	a	h	b	b	a	b	a	a	b	a	a
A07	AX-176820872	AX-176820872_A07	144.151	Arahy.07	67951386		b	a	a	a	b	b	a	b	b	a	b	h	b	b	b	b	h	b	a	b	b	b	b	a	a	a	b	b	a	a	b	h	a	h	h	b	a	b	a	a	b	a	a
A07	AX-177637384	AX-177637384_A07	144.26	Arahy.07	68528895		b	a	a	a	b	b	a	b	b	a	b	a	b	b	b	b	h	b	a	b	b	b	b	a	a	a	b	b	a	a	b	h	a	h	h	b	a	b	a	a	b	a	a
A07	AX-176819773	AX-176819773_A07	144.26	Arahy.07	68549516		b	a	a	a	b	b	a	b	b	a	b	a	b	b	b	b	h	b	a	b	b	b	b	a	a	a	b	b	a	a	b	h	a	h	h	b	a	b	a	a	b	a	a
A07	AX-176805809	AX-176805809_A07	144.26	Arahy.07	68549586		b	a	a	a	b	b	a	b	b	a	b	a	b	b	b	b	h	b	a	b	b	b	b	a	a	a	b	b	a	a	b	h	a	h	h	b	a	b	a	a	b	a	a
A07	AX-177643554	AX-177643554_A07	144.477	Arahy.07	69914771		b	a	a	a	b	b	a	b	b	a	b	a	b	b	b	b	h	b	a	b	b	b	b	-	a	a	b	b	a	a	b	h	a	h	h	b	a	b	a	a	b	a	a
A07	AX-177639313	AX-177639313_A07	144.477	Arahy.07	69950289		b	a	a	a	b	b	a	b	b	a	b	a	b	b	b	b	h	b	a	b	b	b	b	a	a	a	b	b	a	a	b	h	a	h	h	b	a	b	a	a	b	a	a
A07	AX-177637971	AX-177637971_A07	144.477	Arahy.07	70089442		b	a	a	a	b	b	a	b	b	a	b	a	b	b	b	b	h	b	a	b	b	b	b	a	a	a	b	b	a	a	b	h	a	h	h	b	a	b	a	a	b	a	a
A07	AX-147228238	AX-147228238_A07	144.915	Arahy.07	71477033		b	a	a	a	b	b	a	b	b	a	b	a	b	b	b	b	a	b	a	b	b	b	b	a	a	a	b	b	a	a	b	h	a	-	a	b	a	b	a	a	b	a	a
A07	AX-177642398	AX-177642398_A07	145.132	Arahy.07	71991074		b	a	a	a	b	b	a	b	b	a	b	a	b	b	b	b	a	b	a	b	b	b	b	a	a	a	b	b	a	a	b	h	a	h	h	b	a	b	a	a	b	a	a
A07	AX-177640642	AX-177640642_A07	145.458	Arahy.07	71589930		b	a	a	a	b	b	a	b	b	a	b	a	b	b	b	b	h	b	a	b	b	b	b	a	a	a	b	b	a	a	b	h	a	h	h	b	a	b	a	a	b	a	a
A07	AX-176802635	AX-176802635_A07	145.788	Arahy.07	68617537		b	a	a	a	b	b	a	b	b	a	b	a	b	b	b	b	h	b	a	b	b	b	b	a	a	a	b	b	a	-	b	h	a	h	h	b	a	b	a	-	b	a	a
A07	AX-176809776	AX-176809776_A07	146.005	Arahy.07	70256869		b	a	a	a	b	b	a	b	b	a	b	a	b	b	b	b	h	b	a	b	b	b	b	a	a	a	b	b	a	a	b	h	a	h	h	b	a	b	a	a	b	a	a
A07	AX-177643149	AX-177643149_A07	146.332	Arahy.07	70940298		b	a	a	a	b	b	a	b	b	a	b	a	b	b	b	b	h	b	a	b	b	b	b	a	a	a	b	b	a	a	b	h	a	h	h	b	a	b	a	a	b	a	a
A07	AX-177639318	AX-177639318_A07	146.332	Arahy.07	71641739		b	a	a	a	b	b	a	b	b	a	b	a	b	b	b	b	h	b	a	b	b	b	b	a	a	-	b	b	a	a	b	-	a	h	h	b	a	b	a	a	b	a	a
A07	AX-176804255	AX-176804255_A07	146.332	Arahy.07	70940228		b	a	a	a	b	b	a	b	b	a	b	a	b	b	b	b	h	b	a	b	b	b	b	a	a	a	b	b	a	a	b	h	a	h	h	b	a	b	a	a	b	a	a
A07	AX-177637359	AX-177637359_A07	146.83	Arahy.07	71941476		b	-	a	-	b	b	a	b	b	a	b	-	b	b	b	b	h	b	-	b	b	b	b	a	a	a	b	b	a	a	b	h	a	h	h	b	a	b	a	a	b	a	a
A07	AX-177637292	AX-177637292_A07	147.323	Arahy.07	71662237		b	a	a	a	b	b	a	b	b	a	b	a	b	b	b	b	h	b	a	b	b	b	b	a	a	a	b	b	a	a	b	h	a	h	h	b	a	b	a	a	b	a	a
A07	AX-176823515	AX-176823515_A07	147.65	Arahy.07	72203577		b	a	a	a	b	b	a	b	b	a	b	a	b	b	b	b	h	b	a	b	b	b	b	a	a	a	b	b	a	a	b	h	a	h	h	b	a	b	a	a	b	a	a
A07	AX-177637360	AX-177637360_A07	147.65	Arahy.07	72191169		b	a	a	a	b	-	a	b	b	a	b	a	b	b	b	b	h	b	a	b	b	b	b	a	a	a	b	b	a	a	b	h	a	h	h	b	a	b	a	a	b	a	a
A07	AX-147258394	AX-147258394_A07	147.868	Arahy.07	72388335		b	a	a	a	b	b	a	b	b	a	b	a	b	b	b	b	h	b	a	b	b	b	b	a	a	a	b	b	a	a	b	h	a	b	h	b	a	b	a	a	b	a	a
A07	AX-177640658	AX-177640658_A07	149.098	Arahy.07	72635040		b	a	a	h	b	b	a	b	b	a	b	a	b	b	b	b	a	b	a	b	b	b	b	a	a	a	b	b	a	a	b	h	a	b	h	b	a	b	a	a	b	a	a
A07	AX-176815636	AX-176815636_A07	149.872	Arahy.07	72763933		b	a	a	h	b	b	a	b	b	a	b	a	b	b	b	b	a	b	a	b	b	b	b	h	a	a	b	b	a	a	b	h	a	b	h	b	a	b	a	a	b	a	a
A07	AX-177639199	AX-177639199_A07	150.089	Arahy.07	72951898		b	a	a	h	b	b	a	b	b	a	b	a	b	b	b	b	a	b	a	b	b	b	b	h	a	a	b	b	a	a	b	h	a	b	h	b	a	b	a	a	b	a	a
A07	AX-177637269	AX-177637269_A07	150.416	Arahy.07	73278006		b	a	a	h	b	b	a	b	b	a	b	a	b	b	b	b	a	b	a	b	b	b	b	h	a	a	b	b	a	a	b	h	a	b	h	b	a	b	a	a	b	a	a
A07	AX-176792785	AX-176792785_A07	150.634	Arahy.07	73488601		b	a	a	h	b	b	a	b	b	a	b	a	b	b	b	b	a	b	a	b	b	b	b	h	a	a	b	b	a	a	b	h	a	b	h	b	a	b	a	a	b	a	a
A07	AX-177640241	AX-177640241_A07	150.634	Arahy.07	73369840		b	a	a	h	b	b	a	b	b	a	b	a	b	b	b	b	a	b	a	b	b	b	b	h	a	a	b	b	a	a	b	h	a	b	h	b	a	b	a	a	b	a	a
A07	AX-176810504	AX-176810504_A07	150.851	Arahy.07	73331429		b	a	a	h	b	b	a	b	b	a	b	a	b	b	b	b	a	b	a	b	b	b	b	h	a	a	b	b	a	a	b	h	a	b	h	b	a	b	a	a	b	a	a
A07	AX-176794012	AX-176794012_A07	151.738	Arahy.07	73158670		b	a	a	h	b	b	a	b	b	a	b	a	b	b	b	b	a	b	a	b	b	b	b	h	a	a	b	b	a	a	b	h	a	b	h	b	a	b	a	a	b	a	a
A07	AX-147258365	AX-147258365_A07	152.103	Arahy.07	73140965		b	a	a	h	b	b	a	b	b	a	b	a	b	b	b	b	a	b	a	b	b	b	b	h	a	a	b	b	a	a	b	h	a	b	-	b	a	b	a	a	b	a	a
A07	AX-177641617	AX-177641617_A07	152.916	Arahy.07	73210020		b	a	a	h	-	b	a	b	b	a	b	a	b	b	b	-	a	b	a	-	b	b	h	h	a	a	b	b	a	a	b	h	a	b	h	b	a	b	a	a	b	a	a
A07	AX-177642401	AX-177642401_A07	153.279	Arahy.07	73043061		b	a	a	h	b	b	a	b	b	a	b	a	b	b	b	b	a	b	a	b	b	b	b	h	a	a	b	b	a	a	b	h	a	b	h	b	a	b	a	a	b	a	a
A07	AX-176815303	AX-176815303_A07	153.717	Arahy.07	73363694		b	a	a	h	b	b	a	b	b	a	b	a	b	b	b	b	a	b	a	b	b	b	b	h	a	a	b	b	a	a	b	h	a	b	h	b	a	b	a	a	b	a	a
A07	AX-176820961	AX-176820961_A07	154.044	Arahy.07	73584832		b	a	a	h	b	b	a	b	b	a	b	a	b	b	b	b	a	b	a	b	b	b	b	h	a	a	b	b	a	a	b	h	a	b	h	b	a	b	a	a	b	a	a
A07	AX-176796162	AX-176796162_A07	154.262	Arahy.07	73668106		b	a	a	h	b	b	a	b	b	a	b	a	b	b	b	b	a	b	a	b	b	b	b	h	a	a	b	b	a	a	b	h	a	b	h	b	a	b	a	a	b	a	a
A07	AX-176796267	AX-176796267_A07	154.699	Arahy.07	73922742		b	a	a	h	b	b	a	b	b	a	b	a	b	b	b	b	a	b	a	b	b	b	b	h	a	a	b	b	a	a	b	h	a	b	h	b	a	b	a	a	b	a	a
A07	AX-176822318	AX-176822318_A07	154.917	Arahy.07	74171151		b	-	a	h	b	b	a	b	b	a	b	a	b	b	b	b	a	b	a	b	b	b	b	h	a	a	b	b	a	a	b	h	a	b	h	b	a	b	a	a	b	a	a
A07	AX-176798785	AX-176798785_A07	155.357	Arahy.07	74138287		b	a	a	h	-	-	a	b	-	a	h	a	b	b	b	b	a	-	a	h	b	b	b	h	a	a	b	-	a	a	b	h	a	b	h	b	a	b	a	a	b	a	a
A07	AX-176813583	AX-176813583_A07	157.3	Arahy.07	74328219		b	a	a	b	b	b	a	b	b	a	b	a	b	b	b	b	a	b	a	b	b	b	b	a	b	a	b	b	b	a	b	b	a	b	h	b	b	b	a	a	b	a	a
A07	AX-176797462	AX-176797462_A07	159.546	Arahy.07	74579113		b	a	a	b	h	b	a	-	h	a	h	a	h	b	b	-	a	b	-	b	b	-	b	a	b	h	b	b	b	a	h	b	a	b	h	-	b	b	a	h	b	-	a
A07	AX-177637803	AX-177637803_A07	162.061	Arahy.07	74993192		b	a	a	b	b	b	a	b	b	a	b	a	b	b	b	b	a	b	a	b	b	b	b	a	b	a	b	b	b	a	b	b	a	b	h	b	b	b	a	a	b	a	a
A07	AX-176808746	AX-176808746_A07	162.061	Arahy.07	74944361		b	a	a	b	b	b	a	b	b	a	b	a	b	b	b	b	a	b	a	b	b	b	b	a	b	a	b	b	b	a	b	b	a	b	h	b	b	b	a	a	b	a	a
A07	AX-176793787	AX-176793787_A07	162.061	Arahy.07	75178800		b	a	a	b	b	b	a	b	b	a	b	a	b	b	b	b	a	b	a	b	b	b	b	a	b	a	b	b	b	a	b	b	a	b	h	b	b	b	a	a	b	a	a
A07	AX-176817923	AX-176817923_A07	162.061	Arahy.07	75487929		b	a	a	b	b	b	a	b	b	a	b	a	b	b	b	b	a	b	a	b	b	b	b	a	b	a	b	b	b	a	b	b	a	b	h	b	b	b	a	a	b	a	a
A07	AX-176822344	AX-176822344_A07	162.834	Arahy.07	74448450		b	a	a	b	b	b	a	b	b	a	b	a	b	b	b	b	a	b	a	b	b	b	b	a	b	a	b	b	b	a	b	b	a	b	h	b	b	b	a	a	b	a	a
A07	AX-176806999	AX-176806999_A07	163.271	Arahy.07	74674588		b	a	a	b	b	b	a	b	b	a	b	a	b	b	b	b	a	b	a	b	b	b	b	a	b	a	b	b	b	a	b	b	a	b	h	b	b	b	a	a	b	a	a
A07	AX-176803751	AX-176803751_A07	163.763	Arahy.07	74791973		b	a	a	b	b	b	a	b	b	a	b	a	-	b	b	b	a	b	a	b	b	b	b	a	b	a	b	b	b	a	b	b	a	b	h	b	b	b	a	a	-	a	a
A07	AX-176806206	AX-176806206_A07	164.259	Arahy.07	75603774		b	a	a	b	b	b	a	b	b	a	b	a	b	b	b	b	a	b	a	b	b	b	b	a	b	a	b	b	b	a	b	b	a	b	h	b	b	b	a	a	b	a	a
A07	AX-176815447	AX-176815447_A07	164.476	Arahy.07	75450170		b	a	a	b	b	b	a	b	b	a	b	-	b	b	b	b	a	b	a	b	b	b	b	a	b	a	b	b	b	a	b	b	a	b	h	b	b	b	a	a	b	a	a
A07	AX-177643281	AX-177643281_A07	164.585	Arahy.07	75696828		b	a	a	b	b	b	a	b	b	a	b	a	b	b	b	b	a	b	a	b	b	b	b	a	b	a	b	b	b	a	b	b	a	b	b	b	b	b	a	a	b	a	a
A07	AX-176806102	AX-176806102_A07	165.022	Arahy.07	75961947		b	a	a	b	b	b	a	b	b	a	b	a	b	b	b	b	a	b	a	b	b	b	b	a	b	a	b	b	b	a	b	b	a	b	b	b	b	b	a	a	b	a	a
A07	AX-177639058	AX-177639058_A07	165.022	Arahy.07	75940881		b	a	a	b	b	b	a	b	b	a	b	a	b	b	b	b	a	b	a	b	b	b	b	a	b	a	b	b	b	a	b	b	a	b	b	b	b	b	a	a	b	a	a
A07	AX-177637727	AX-177637727_A07	165.24	Arahy.07	75961807		b	a	a	b	b	b	a	b	b	a	b	a	b	b	b	b	a	b	a	b	b	b	b	a	b	a	b	b	b	a	b	b	a	b	b	b	b	b	a	a	b	a	a
A07	AX-176793210	AX-176793210_A07	166.126	Arahy.07	76072332		b	a	a	b	b	b	a	b	b	a	b	a	b	b	b	b	a	b	a	b	b	b	b	a	b	a	b	b	b	a	b	b	a	b	b	b	b	b	a	a	b	a	a
A07	AX-176812601	AX-176812601_A07	167.104	Arahy.07	76329954		b	a	a	b	-	-	a	-	b	a	b	-	-	b	b	b	a	b	a	b	b	b	b	a	b	a	b	b	b	a	b	b	a	b	b	b	b	b	a	a	b	a	a
A07	AX-176823306	AX-176823306_A07	167.346	Arahy.07	76429378		b	a	a	b	b	b	a	b	b	a	b	a	b	b	b	b	a	b	a	b	b	b	b	a	b	a	b	b	b	a	b	b	a	b	b	b	b	b	a	a	b	a	a
A07	AX-147229004	AX-147229004_A07	167.482	Arahy.07	76926496		b	a	a	b	b	b	a	b	b	a	b	-	b	b	b	b	a	b	a	b	b	b	b	a	b	a	b	b	b	a	b	b	a	b	b	b	b	b	a	a	b	a	a
A07	AX-176807393	AX-176807393_A07	167.891	Arahy.07	77170184		b	a	a	b	b	b	a	b	b	a	b	h	b	b	b	b	a	b	a	b	b	b	b	a	b	a	b	b	b	a	b	b	a	b	b	b	b	b	a	a	b	a	a
A07	AX-176816640	AX-176816640_A07	168.216	Arahy.07	77310511		b	a	a	b	b	b	a	b	b	a	b	-	b	b	b	b	a	b	a	b	b	b	b	a	b	a	b	b	b	a	b	b	a	b	b	b	b	b	a	a	b	a	a
A07	AX-176811399	AX-176811399_B09	168.218	Arahy.07	10325298		b	a	a	b	b	b	a	b	b	a	b	a	b	b	b	b	a	b	a	b	b	b	b	a	b	a	b	b	b	a	b	b	-	b	b	b	-	b	a	a	b	a	a
A07	AX-176818148	AX-176818148_A07	168.218	Arahy.07	77410464		b	a	a	b	b	b	a	b	b	a	b	-	b	b	b	b	a	b	a	b	b	b	b	-	b	a	b	b	b	a	b	b	a	b	b	b	b	b	a	a	b	a	a
A07	AX-176793571	AX-176793571_A07	168.22	Arahy.07	77334612		b	a	a	b	b	b	a	b	b	a	b	-	b	b	b	b	a	b	a	b	b	b	b	a	b	a	b	b	b	a	b	b	a	b	b	b	b	b	a	a	b	a	a
A07	AX-176812111	AX-176812111_A07	168.545	Arahy.07	77450207		b	a	a	b	b	b	a	b	b	a	b	h	b	b	b	b	a	b	a	b	b	b	b	a	b	a	b	b	b	a	b	b	a	b	b	b	b	b	a	a	b	a	a
A07	AX-176794766	AX-176794766_A07	168.546	Arahy.07	77463256		b	a	a	b	b	b	a	b	b	a	b	-	b	b	b	b	a	b	a	b	b	b	b	a	b	a	b	b	b	a	b	b	a	b	b	b	b	b	a	a	b	a	a
A07	AX-176812469	AX-176812469_A07	169.32	Arahy.07	44721104		b	a	a	b	b	b	a	b	b	a	b	a	b	b	b	b	a	b	a	b	b	b	b	a	b	a	b	b	b	a	b	b	a	b	b	b	b	b	a	a	b	a	a
A07	AX-176811927	AX-176811927_A07	170.601	Arahy.07	77803617		b	a	a	b	b	b	a	b	b	a	b	a	b	b	b	b	a	b	a	b	b	b	b	a	b	a	b	b	b	a	b	b	a	b	b	b	b	b	a	a	b	a	a
A07	AX-147238692	AX-147238692_A07	175.524	Arahy.07	78012272		b	a	a	b	b	b	a	b	b	a	a	a	b	b	b	b	a	b	b	b	b	b	b	a	b	a	b	b	b	a	a	b	a	b	b	a	b	a	a	a	b	a	a
A07	AX-176815402	AX-176815402_A07	177.543	Arahy.07	78048989		b	a	a	b	b	b	a	b	b	a	a	a	b	b	b	b	a	b	b	b	b	b	b	a	b	a	b	b	b	a	a	b	a	b	b	a	a	a	a	a	b	a	a
A07	AX-176817917	AX-176817917_A07	178.545	Arahy.07	78085952		b	a	a	b	b	b	a	b	b	a	a	-	b	b	b	b	a	b	b	b	b	b	b	a	b	a	b	b	b	a	a	b	a	b	b	a	a	a	a	a	b	a	a
A07	AX-176806456	AX-176806456_A07	179.433	Arahy.07	78302066		b	a	a	b	b	b	a	b	b	a	a	-	b	b	b	b	a	b	b	b	b	b	b	a	b	a	b	b	b	a	a	b	a	b	b	a	a	a	a	a	b	a	a
A07	AX-176801605	AX-176801605_A07	179.921	Arahy.07	78817017		b	a	a	b	a	b	a	b	b	a	a	a	b	b	b	b	a	b	b	b	b	b	b	a	b	a	b	b	b	a	a	b	a	b	b	a	a	a	a	a	b	a	a
A07	AX-176815292	AX-176815292_A07	180.419	Arahy.07	78427061		b	a	a	b	a	b	a	b	b	a	a	a	b	b	b	b	a	-	b	b	b	b	b	a	b	a	b	b	b	a	a	b	a	b	b	a	a	a	a	a	b	a	a
A07	AX-176815293	AX-176815293_A07	180.746	Arahy.07	78527661		b	a	a	b	a	b	a	b	b	a	a	-	b	b	b	b	a	b	b	b	b	b	b	a	b	a	b	b	b	a	a	b	a	b	b	a	a	a	a	a	b	a	a
A07	AX-176812063	AX-176812063_A07	180.746	Arahy.07	78608643		b	a	a	b	a	b	a	b	b	a	a	a	b	b	b	b	a	b	b	b	b	b	b	a	b	a	b	b	b	a	a	b	a	b	b	a	a	a	a	a	b	a	a
A07	AX-176804685	AX-176804685_A07	180.866	Arahy.07	78892702		b	a	a	b	a	b	a	b	b	a	a	-	b	b	b	b	a	b	b	b	b	b	b	a	b	a	b	b	b	a	a	b	a	b	b	a	a	a	a	a	b	a	a
A07	AX-176802118	AX-176802118_A07	181.957	Arahy.07	79254372		b	a	a	b	a	b	a	b	b	a	a	-	b	b	b	b	a	b	b	b	b	b	b	a	b	a	b	b	b	a	a	h	a	b	b	a	a	a	a	a	b	a	a
A07	AX-176823197	AX-176823197_A07	182.076	Arahy.07	79444099		b	-	a	b	a	b	a	b	b	a	a	h	b	b	b	b	a	b	b	b	b	b	b	a	b	a	b	b	b	a	a	h	a	b	b	a	a	a	a	a	b	a	a
A07	AX-176802520	AX-176802520_A07	182.371	Arahy.07	79164517		b	a	a	b	a	b	a	b	b	a	a	-	b	b	b	b	a	b	b	b	b	b	b	a	b	a	b	b	b	a	a	h	a	b	b	a	a	a	a	a	b	a	a
A07	AX-176807260	AX-176807260_A07	182.513	Arahy.07	79222575		b	a	a	b	a	b	a	b	b	a	a	a	b	b	b	b	a	b	b	b	b	b	b	a	b	a	b	b	b	a	a	h	a	b	b	a	a	a	a	a	b	a	a
A07	AX-176804678	AX-176804678_A07	183.745	Arahy.07	79548705		b	a	a	b	a	b	a	b	b	a	a	a	b	b	b	b	a	b	b	b	b	b	b	a	b	a	b	b	b	a	-	h	a	b	b	a	a	a	a	a	b	a	a
A07	AX-176796942	AX-176796942_A07	184.405	Arahy.07	79656741		b	a	a	b	a	b	a	b	b	a	a	a	b	b	b	b	a	b	b	b	b	b	b	a	b	a	b	b	b	a	a	h	a	b	b	a	a	a	a	a	b	a	a
A07	AX-176796175	AX-176796175_A07	185.576	Arahy.07	79643508		b	a	a	b	a	b	a	b	b	a	-	b	b	b	b	b	a	b	b	b	b	b	b	a	b	a	b	b	b	a	a	b	a	b	b	a	a	a	a	h	b	a	a
A07	AX-176800529	AX-176800529_A07	188.588	Arahy.07	79743898		b	a	a	b	a	b	a	b	b	a	a	a	b	b	b	b	a	b	b	b	b	b	b	a	b	a	b	b	b	a	h	a	a	b	b	b	a	a	a	a	b	a	a
A07	AX-176822338	AX-176822338_A07	192.285	Arahy.07	80095381		b	a	a	a	a	b	a	b	b	b	a	-	b	b	b	b	a	b	b	b	b	b	b	a	b	a	b	b	a	a	h	a	a	b	b	b	a	b	b	a	b	a	a
A07	AX-176808401	AX-176808401_A07	192.968	Arahy.07	80085700		b	a	a	a	a	b	a	b	b	b	a	h	b	b	b	b	a	b	b	b	b	b	-	a	b	-	b	b	a	h	h	-	-	b	b	b	a	b	b	a	b	a	a
A07	AX-176815992	AX-176815992_A07	195.215	Arahy.07	80153836		b	a	a	a	a	b	h	b	b	b	a	-	b	b	b	b	a	b	b	b	b	b	b	a	b	a	b	b	a	a	h	a	a	b	b	b	a	b	b	a	b	a	a
A07	AX-176799881	AX-176799881_A07	197.707	Arahy.07	80285528		b	a	a	a	a	b	b	b	b	b	a	a	b	b	b	b	a	b	b	b	b	b	b	a	b	a	b	b	a	a	h	a	a	b	b	b	a	b	b	a	b	a	a
A07	AX-176808618	AX-176808618_A07	197.816	Arahy.07	80432275		b	a	a	a	a	b	b	b	b	b	a	a	b	b	b	b	a	b	b	b	b	b	b	a	b	a	b	b	a	a	h	a	a	b	b	b	a	b	b	a	b	a	a
A07	AX-177642037	AX-177642037_A07	197.816	Arahy.07	80361037		b	a	a	a	a	b	b	b	b	b	a	a	b	b	b	b	a	b	b	b	b	b	b	a	b	a	b	b	a	a	h	a	a	b	b	b	a	b	b	a	b	a	a
A07	AX-147228831	AX-147228831_A07	199.364	Arahy.07	80462896		b	a	a	a	a	b	b	b	-	b	a	a	b	b	b	b	a	b	b	b	b	b	b	a	b	a	b	b	a	a	h	a	a	b	b	b	a	b	b	a	b	a	a
A07	AX-147228827	AX-147228827_A07	200.058	Arahy.07	80481296		a	a	a	a	a	b	b	b	h	b	a	a	b	b	b	b	a	b	b	b	b	b	b	a	b	a	b	b	a	b	h	a	a	b	b	b	a	b	b	a	b	a	a
A07	AX-147256945	AX-147256945_B08	200.385	Arahy.07	1180437		a	a	a	a	a	b	b	b	h	b	a	a	b	b	b	b	a	b	b	b	b	b	b	a	b	h	b	b	a	b	-	a	a	b	b	b	a	b	b	a	b	a	a
A07	AX-147256944	AX-147256944_A07	200.602	Arahy.07	80530475		a	a	a	a	a	b	b	b	h	b	a	h	b	b	b	b	a	b	b	b	b	b	b	a	b	h	b	b	a	b	h	a	a	b	b	b	a	b	b	a	b	a	a
A07	AX-176793387	AX-176793387_A07	202.633	Arahy.07	80549059		a	a	a	a	a	b	b	b	h	b	a	b	b	b	b	b	a	b	b	b	b	b	b	a	b	h	b	b	a	b	h	a	a	b	a	a	a	b	b	a	b	a	a
A07	AX-176791695	AX-176791695_B08	203.903	Arahy.07	963184		a	a	a	a	a	b	b	a	h	b	a	b	b	b	b	b	a	b	b	b	b	b	b	a	b	b	b	b	a	b	h	a	a	b	a	a	a	b	b	a	b	a	b
A08	AX-176792388	AX-176792388_A08	0	Arahy.08	767635		a	a	h	b	a	a	a	b	a	a	a	a	b	b	a	a	a	a	b	a	b	a	b	b	a	a	a	a	a	a	h	b	a	b	b	b	a	b	b	a	a	b	a
A08	AX-176819500	AX-176819500_A08	0.333	Arahy.08	767705		a	a	h	b	a	a	a	b	a	a	a	-	b	b	a	a	-	a	b	a	b	a	b	b	-	a	a	a	a	a	a	b	a	b	b	b	-	b	b	a	a	b	a
A08	AX-176824265	AX-176824265_A08	1.453	Arahy.08	1004356		a	h	-	b	a	a	a	b	a	a	a	a	b	b	a	a	a	a	b	a	b	a	b	b	a	a	a	a	a	a	a	b	a	b	b	b	a	b	b	a	a	b	a
A08	AX-176798165	AX-176798165_A08	1.453	Arahy.08	1004286		a	h	h	b	a	a	a	b	a	a	a	a	b	b	a	a	a	a	b	a	b	a	b	b	a	a	a	a	a	a	a	b	a	b	b	b	a	b	b	a	a	b	a
A08	AX-176824005	AX-176824005_A08	1.891	Arahy.08	1096011		a	h	h	b	a	a	a	b	a	a	a	a	b	b	a	a	a	a	b	a	b	a	b	b	a	a	a	a	a	a	a	b	a	b	b	b	a	b	b	a	a	b	a
A08	AX-176792382	AX-176792382_A08	2.218	Arahy.08	1227249		a	h	h	b	a	a	a	b	a	a	a	a	b	b	a	a	a	a	b	a	b	a	b	b	a	a	a	a	a	a	a	b	a	b	b	b	a	b	b	a	a	b	a
A08	AX-177637541	AX-177637541_A08	2.435	Arahy.08	1438145		a	h	-	b	a	a	a	b	a	a	a	a	b	b	a	a	a	a	b	a	b	a	b	b	a	a	a	a	a	a	a	b	a	b	b	b	a	b	b	a	a	b	a
A08	AX-147229177	AX-147229177_B07	2.435	Arahy.08	112155529		a	h	h	b	a	a	a	b	a	a	a	a	b	b	a	a	a	a	b	a	b	a	b	b	a	a	a	a	a	a	a	b	a	b	b	b	a	b	b	a	a	b	a
A08	AX-147229198	AX-147229198_A08	2.763	Arahy.08	1665539		a	h	h	b	a	a	a	b	a	a	a	a	b	b	a	a	a	a	b	a	b	a	b	b	a	a	a	a	a	b	a	b	a	b	b	b	a	b	b	a	a	b	a
A08	AX-176799563	AX-176799563_A08	2.763	Arahy.08	1495413		a	h	h	b	a	a	a	b	a	a	a	a	b	b	a	a	a	a	b	a	b	a	b	b	a	a	a	a	a	b	a	b	a	b	b	b	a	b	b	a	a	b	a
A08	AX-176815646	AX-176815646_A08	2.98	Arahy.08	1900595		a	h	h	b	a	a	a	b	a	a	a	a	b	b	a	a	a	a	b	a	b	a	b	b	a	a	a	a	a	b	a	b	a	b	b	b	a	b	b	a	a	b	a
A08	AX-176823459	AX-176823459_A08	3.198	Arahy.08	1898206		a	h	h	b	a	a	a	b	a	a	a	a	b	b	a	a	a	a	b	a	b	a	b	b	a	a	a	a	a	b	a	b	a	b	b	b	a	b	b	a	a	b	a
A08	AX-176801945	AX-176801945_A08	3.306	Arahy.08	1646863		a	h	a	b	a	a	a	b	a	a	a	a	b	b	a	a	a	a	b	a	b	a	b	b	a	a	a	a	a	b	a	b	a	b	b	b	a	b	b	a	a	b	a
A08	AX-176819180	AX-176819180_A08	3.772	Arahy.08	2179089		a	h	a	b	a	a	a	b	a	a	a	a	b	b	a	a	a	a	b	a	b	a	b	b	a	a	a	a	a	b	a	b	a	b	b	b	a	b	b	a	a	b	a
A08	AX-176812444	AX-176812444_A08	5.091	Arahy.08	2272686		a	h	h	b	a	a	a	b	a	a	a	a	b	a	a	a	a	a	b	a	b	a	b	b	a	a	a	a	a	b	a	a	a	b	b	b	a	b	b	a	a	b	a
A08	AX-177640532	AX-177640532_A08	5.199	Arahy.08	2254856		a	h	h	b	a	a	a	b	a	a	a	a	b	a	a	a	a	a	b	a	b	a	b	b	a	a	a	a	a	b	a	a	a	b	b	b	a	b	b	a	a	b	a
A08	AX-176792257	AX-176792257_A08	5.339	Arahy.08	2264505		a	h	h	b	a	a	a	b	a	a	a	a	b	a	a	a	a	a	b	a	b	a	b	b	a	a	a	a	a	b	a	a	a	b	b	b	a	b	b	a	a	b	a
A08	AX-176796147	AX-176796147_A08	5.744	Arahy.08	2312145		a	h	h	b	a	a	a	b	a	a	a	a	b	a	a	a	a	a	b	a	b	a	b	-	a	a	a	a	a	b	a	a	a	b	b	b	a	b	b	a	a	b	a
A08	AX-177644578	AX-177644578_A08	6.182	Arahy.08	2264575		a	h	h	b	a	a	a	b	a	a	a	a	b	a	a	a	a	a	b	a	b	a	b	b	a	a	a	a	a	b	a	a	a	b	b	b	a	b	b	a	a	b	a
A08	AX-177640082	AX-177640082_A08	6.399	Arahy.08	2717992		a	h	h	b	a	a	a	b	a	a	a	a	b	a	a	a	a	a	b	a	b	a	b	b	a	a	a	a	a	b	a	a	a	b	b	b	a	b	b	a	a	b	a
A08	AX-177639501	AX-177639501_A08	6.399	Arahy.08	2409305		a	h	h	b	a	a	a	b	a	a	a	a	b	a	a	a	a	a	b	a	b	a	b	b	a	a	a	a	a	b	a	a	a	b	b	b	a	b	b	a	a	b	a
A08	AX-176823632	AX-176823632_A08	6.508	Arahy.08	2677878		a	h	h	b	a	a	a	b	a	a	a	a	b	a	a	a	a	a	b	a	b	a	b	b	a	a	a	a	a	b	a	a	a	b	b	b	a	b	b	a	a	b	a
A08	AX-176807710	AX-176807710_A08	6.616	Arahy.08	2658017		a	h	-	b	a	a	a	b	a	a	a	a	b	a	a	a	a	a	b	a	b	a	b	b	a	a	a	a	a	b	a	a	a	b	b	b	a	b	b	a	a	b	a
A08	AX-176815038	AX-176815038_A08	6.725	Arahy.08	3046963		a	h	h	b	a	a	a	b	a	a	a	a	b	a	a	a	a	a	b	a	b	a	b	b	a	a	a	a	a	b	a	a	a	b	b	b	a	b	b	a	a	b	a
A08	AX-176797837	AX-176797837_A08	6.942	Arahy.08	2877665		a	h	h	b	a	a	a	b	a	a	a	a	b	a	a	a	a	a	b	a	b	a	b	b	a	a	a	a	a	b	a	a	a	b	b	b	a	b	b	a	a	b	a
A08	AX-176805510	AX-176805510_A08	7.16	Arahy.08	2911879		a	h	h	b	a	a	a	b	a	a	a	a	b	a	a	a	a	a	b	a	b	a	b	b	a	a	a	a	a	b	a	a	a	b	b	b	a	b	b	a	a	b	a
A08	AX-176820439	AX-176820439_A08	7.268	Arahy.08	3248670		a	h	h	b	a	a	a	b	a	a	a	a	b	a	a	a	a	a	b	a	b	a	b	b	a	a	a	a	a	b	a	a	a	b	b	b	a	b	b	a	a	b	a
A08	AX-176820061	AX-176820061_A08	7.268	Arahy.08	3413461		a	h	-	b	a	a	a	b	a	a	a	a	b	a	a	a	a	a	b	a	b	a	b	b	a	a	a	a	a	b	a	a	a	b	b	b	a	b	b	a	a	b	a
A08	AX-176823886	AX-176823886_A08	7.928	Arahy.08	3692629		a	h	h	b	a	a	a	b	b	a	a	-	b	a	a	a	a	a	b	a	b	a	b	b	a	a	a	a	a	b	a	a	a	b	b	b	a	b	b	a	a	b	a
A08	AX-176797177	AX-176797177_A08	7.928	Arahy.08	3636138		a	h	h	b	a	a	a	b	b	a	a	a	b	a	a	a	a	a	b	a	b	a	b	b	a	a	a	a	a	b	a	a	a	b	b	b	a	b	b	a	a	b	a
A08	AX-177640612	AX-177640612_A08	22.515	Arahy.08	9021584		a	b	b	a	b	b	a	b	b	a	a	a	a	a	a	a	a	a	b	a	a	a	b	a	a	a	a	b	a	b	a	a	a	b	b	b	h	b	b	a	b	b	a
A08	AX-177639020	AX-177639020_A08	29.746	Arahy.08	10182171		b	b	b	a	b	b	a	b	b	a	a	a	a	a	a	a	a	a	b	b	a	b	b	a	a	a	h	b	a	b	a	a	a	b	a	b	a	h	b	a	b	b	a
A08	AX-177639131	AX-177639131_A08	38.813	Arahy.08	13392658		h	b	b	a	b	b	h	b	b	a	a	a	h	a	a	a	b	a	b	b	a	b	a	a	a	a	b	b	b	b	a	a	a	a	a	b	a	a	b	a	b	b	b
A08	AX-176815326	AX-176815326_A08	40.502	Arahy.08	13891102		h	b	b	a	b	b	h	b	b	a	a	a	h	a	a	a	b	a	b	b	a	b	a	a	a	a	b	b	b	b	a	a	a	a	a	b	a	a	b	a	-	b	b
A08	AX-176793019	AX-176793019_A08	42.583	Arahy.08	14326353		b	b	b	a	b	b	h	b	b	a	a	a	h	a	a	a	b	a	b	b	a	b	a	a	a	a	b	b	b	b	a	a	a	a	b	b	h	a	b	a	b	b	b
A08	AX-176811422	AX-176811422_A08	42.692	Arahy.08	14286852		b	b	b	a	b	b	h	b	b	a	a	a	-	a	a	a	b	a	b	b	a	b	a	a	a	a	b	b	b	b	a	a	a	a	b	b	-	a	b	a	b	b	b
A08	AX-147256666	AX-147256666_A08	42.91	Arahy.08	14565542		b	b	b	a	b	b	h	b	b	a	a	a	h	a	a	a	b	a	b	b	a	b	a	a	a	a	b	b	b	b	a	a	a	a	b	b	h	a	b	a	b	b	b
A08	AX-176817894	AX-176817894_A08	43.307	Arahy.08	14867582		b	b	b	a	b	b	h	b	b	a	a	a	h	a	a	a	b	a	b	b	a	b	a	a	a	a	b	b	b	b	a	a	a	a	b	b	h	a	b	a	b	b	b
A08	AX-176803182	AX-176803182_A08	44.053	Arahy.08	14742314		b	b	b	a	b	b	h	b	b	a	a	a	h	a	a	a	b	a	b	b	a	b	a	a	a	a	b	b	b	b	a	a	a	a	b	b	h	a	b	a	b	b	b
A08	AX-176805246	AX-176805246_A08	45.54	Arahy.08	15322134		-	b	b	a	b	b	h	b	b	a	a	a	h	a	a	a	b	a	b	b	a	b	a	a	a	a	b	b	b	b	a	a	a	a	b	-	h	a	-	a	b	-	b
A08	AX-176820923	AX-176820923_A08	46.04	Arahy.08	15237892		b	b	b	a	b	b	h	b	b	a	a	a	h	a	a	a	b	a	b	b	a	b	a	a	a	a	b	b	b	b	a	a	a	a	b	b	h	a	b	a	b	b	b
A08	AX-177637512	AX-177637512_A08	46.257	Arahy.08	15487332		b	b	b	a	b	b	h	b	b	a	a	a	h	a	a	a	b	a	b	b	a	b	a	a	a	a	b	b	b	b	a	a	a	a	b	b	h	a	b	a	b	b	b
A08	AX-176809424	AX-176809424_A08	47.031	Arahy.08	16010190		b	b	b	a	b	b	h	b	b	a	a	a	h	a	a	a	b	a	b	b	a	b	-	a	a	a	b	b	b	b	a	a	a	a	b	b	h	a	b	a	b	b	a
A08	AX-147256804	AX-147256804_A08	48.494	Arahy.08	16635570		b	b	b	a	b	b	h	b	b	a	a	a	h	a	a	a	b	a	h	b	a	b	a	a	a	a	b	b	b	b	a	a	a	a	b	b	h	a	b	a	b	b	a
A08	AX-176817898	AX-176817898_A08	49.957	Arahy.08	17053136		b	b	b	a	b	b	h	b	h	a	a	a	h	a	a	a	b	a	b	b	a	b	a	a	a	a	b	b	b	b	a	b	a	a	b	b	h	a	a	a	b	b	a
A08	AX-176817895	AX-176817895_A08	49.957	Arahy.08	16954073		b	b	b	a	b	b	h	b	h	a	a	a	h	a	a	a	b	a	b	b	a	b	a	a	a	a	b	b	b	b	a	b	a	a	b	b	h	a	a	a	b	b	a
A08	AX-177638166	AX-177638166_A08	49.966	Arahy.08	17150703		b	-	b	a	b	-	h	b	h	a	a	a	h	a	a	a	b	a	b	b	a	b	a	a	a	a	b	b	b	b	a	b	a	a	b	b	h	a	a	a	b	b	a
A08	AX-176805342	AX-176805342_A08	50.395	Arahy.08	17220497		b	b	b	a	b	b	h	b	h	a	a	a	h	a	a	a	b	a	b	b	a	b	a	a	a	a	b	b	b	b	a	b	a	a	b	b	h	a	a	a	b	b	a
A08	AX-176803854	AX-176803854_A08	50.722	Arahy.08	17256859		b	b	b	a	b	b	-	b	h	a	a	a	h	a	a	a	b	a	b	b	a	b	a	a	a	a	b	b	b	b	a	b	a	a	b	b	h	a	a	a	b	b	a
A08	AX-176811013	AX-176811013_A08	51.799	Arahy.08	17168862		b	h	b	a	b	b	h	b	h	a	a	a	a	a	a	a	b	a	b	b	a	b	a	a	a	a	b	b	b	-	a	b	a	a	b	b	h	a	a	a	b	b	a
A08	AX-147230424	AX-147230424_A08	53.777	Arahy.08	27260426		b	b	b	a	b	b	h	b	h	a	a	a	b	a	a	a	b	a	b	b	a	b	a	a	a	a	b	b	b	b	a	b	a	a	b	b	h	a	a	a	b	b	a
A08	AX-176817170	AX-176817170_A08	53.886	Arahy.08	25606842		b	b	b	a	b	b	h	b	h	a	a	a	b	a	a	a	b	a	b	b	a	b	a	a	a	a	b	b	b	b	a	b	a	a	b	b	h	a	a	a	b	b	a
A08	AX-176791968	AX-176791968_A08	55.118	Arahy.08	27638836		b	b	b	a	b	b	a	b	h	a	a	a	b	a	a	a	b	a	b	b	a	b	a	a	a	a	b	b	b	b	a	b	a	a	b	b	a	a	a	a	b	b	a
A08	AX-147230578	AX-147230578_A08	58.067	Arahy.08	30354737		b	a	b	a	b	b	a	a	h	a	a	a	b	a	a	a	b	a	b	b	a	b	a	a	a	a	b	b	b	b	a	b	a	a	b	b	a	a	a	a	b	b	a
A08	AX-177643293	AX-177643293_A08	67.251	Arahy.08	34753219		b	a	b	a	b	b	a	-	h	a	b	a	b	a	a	a	b	a	b	b	a	b	a	a	a	a	b	b	b	b	a	a	a	a	b	b	a	a	a	b	b	b	a
A08	AX-176801372	AX-176801372_A08	68.553	Arahy.08	35510552		b	a	b	a	b	b	a	h	h	a	b	a	b	a	b	a	b	a	b	b	a	b	a	a	a	a	b	b	b	b	a	a	a	a	b	b	a	a	a	b	b	b	a
A08	AX-177639181	AX-177639181_A08	74.384	Arahy.08	39333578		b	a	b	a	a	b	a	a	b	a	b	a	b	a	b	a	b	a	a	b	a	b	a	a	a	a	b	a	b	b	a	a	a	a	b	b	a	a	a	b	a	b	a
A08	AX-176815374	AX-176815374_A08	79.061	Arahy.08	41066121		b	a	b	a	a	b	b	a	a	a	b	h	b	a	b	a	b	b	a	b	a	b	a	a	a	a	h	a	b	b	a	a	a	a	b	b	a	a	a	b	a	b	a
A08	AX-176818735	AX-176818735_A08	79.389	Arahy.08	41110485		b	a	b	a	a	b	b	a	a	a	b	h	b	a	b	a	b	b	a	b	a	b	a	a	a	a	-	a	b	b	a	a	a	a	b	b	a	a	a	b	a	b	a
A08	AX-177637560	AX-177637560_A08	83.143	Arahy.08	42419925		b	a	b	a	a	b	b	a	a	b	b	a	b	a	b	a	-	b	a	b	a	b	a	a	a	a	-	a	b	b	a	a	a	a	b	b	a	a	a	b	a	b	a
A08	AX-176799308	AX-176799308_A08	85.29	Arahy.08	42412194		b	h	b	a	-	b	b	h	a	b	b	a	b	a	b	a	h	b	-	b	a	b	a	a	a	a	h	-	b	b	a	a	a	-	b	b	a	a	a	b	a	b	a
A08	AX-176800797	AX-176800797_A08	88.429	Arahy.08	42575276		b	a	b	a	a	b	b	a	a	b	b	h	b	a	b	a	h	b	a	b	a	b	a	a	a	a	h	a	b	b	a	a	a	a	b	b	a	a	a	b	a	b	a
A08	AX-176815388	AX-176815388_A08	98.132	Arahy.08	46776500		h	a	b	a	a	b	b	a	a	b	h	b	a	a	a	b	b	b	a	b	a	b	a	a	a	a	b	a	b	b	a	a	b	a	b	b	a	a	a	b	a	b	a
A08	AX-176809463	AX-176809463_A08	101.198	Arahy.08	47129574		b	a	a	a	a	b	b	a	a	b	h	b	a	a	b	b	b	b	a	b	a	b	a	a	a	h	b	a	b	b	a	a	b	a	b	b	a	a	a	b	a	b	a
A08	AX-177639642	AX-177639642_A08	102.403	Arahy.08	47307861		b	a	a	a	a	b	b	a	a	b	h	b	a	a	b	b	b	b	a	b	a	b	a	a	a	h	b	a	b	b	a	a	b	a	b	b	a	a	a	b	a	b	a
A08	AX-147231677	AX-147231677_A08	102.754	Arahy.08	47300580		b	a	a	a	a	b	b	a	a	b	h	b	a	a	b	b	b	b	a	b	a	b	a	a	a	h	b	a	b	b	a	a	b	a	b	b	a	a	a	b	a	b	a
A08	AX-176801164	AX-176801164_A08	103.192	Arahy.08	47401592		b	a	a	a	a	b	b	a	a	b	h	b	a	a	b	b	b	b	a	b	a	b	a	a	a	h	b	a	b	b	a	a	b	a	b	b	a	a	a	b	a	b	a
A08	AX-177638722	AX-177638722_A08	103.741	Arahy.08	47745888		b	a	a	a	a	b	b	a	a	b	h	b	a	a	b	b	b	b	a	b	a	b	a	a	a	h	b	a	b	b	a	a	b	a	b	b	a	a	a	b	a	b	a
A08	AX-147259396	AX-147259396_B08	103.958	Arahy.08	131873300		b	a	a	a	a	b	b	a	a	b	h	b	a	a	b	b	b	b	a	b	a	b	a	a	a	h	b	a	b	b	a	a	b	a	b	b	a	a	a	b	a	b	a
A08	AX-176799572	AX-176799572_A08	104.123	Arahy.08	47617997		b	a	a	a	a	b	b	a	a	b	h	b	a	a	b	b	b	b	a	b	a	b	a	a	a	h	b	a	b	b	a	a	b	a	b	b	a	a	a	b	a	b	a
A08	AX-177638089	AX-177638089_A08	104.285	Arahy.08	47700998		b	a	a	a	a	b	b	a	a	b	h	b	a	a	b	b	b	b	a	b	a	b	a	a	a	h	b	a	b	b	a	a	b	a	b	b	a	a	a	b	a	b	a
A08	AX-177639909	AX-177639909_A08	107.725	Arahy.08	48349901		b	a	a	a	a	b	b	a	a	b	h	b	a	a	b	b	b	h	a	b	a	b	a	a	a	b	b	a	b	b	a	b	b	a	b	b	a	a	a	b	a	b	a
A08	AX-177637914	AX-177637914_A08	108.053	Arahy.08	48419510		b	a	a	a	a	b	b	a	a	b	h	b	a	a	b	b	b	h	a	b	a	b	a	a	a	b	b	a	b	b	a	b	b	a	b	b	a	a	a	b	a	b	a
A08	AX-177640860	AX-177640860_A08	108.053	Arahy.08	48516113		b	a	a	a	a	b	b	a	a	b	h	b	a	a	b	b	-	h	a	b	a	b	a	a	a	b	b	a	b	b	a	b	b	a	b	b	a	a	a	b	a	b	a
A08	AX-177639781	AX-177639781_A08	120.249	Arahy.08	50299697		b	a	a	a	a	b	b	a	b	b	h	b	b	a	b	b	a	h	a	b	a	b	a	b	a	a	b	a	b	b	a	b	b	a	a	a	a	a	a	b	a	a	a
A08	AX-176792694	AX-176792694_A08	121.844	Arahy.08	50476211		b	a	a	a	a	b	b	a	b	b	h	b	b	h	b	b	a	h	a	-	a	b	a	-	a	a	b	a	b	b	a	b	b	a	a	a	a	a	a	b	a	a	a
A08	AX-177639010	AX-177639010_A08	123.443	Arahy.08	50475735		b	a	a	a	a	b	b	a	b	b	h	b	b	b	b	b	a	a	a	-	a	b	a	-	a	a	b	a	b	-	a	h	b	a	a	a	a	a	a	b	a	a	a
A08	AX-176822539	AX-176822539_A08	125.402	Arahy.08	50506070		b	a	a	a	a	b	b	a	b	b	h	b	b	b	b	b	a	h	a	b	a	b	a	b	a	a	b	a	b	b	a	b	b	a	a	a	a	a	a	b	a	a	a
A08	AX-147231974	AX-147231974_A08	126.402	Arahy.08	50690467		b	a	a	a	a	b	b	a	b	b	h	b	b	b	b	b	a	h	a	b	a	b	a	b	a	a	b	a	b	b	a	b	b	a	a	a	a	a	a	b	a	a	a
A08	AX-147231987	AX-147231987_A08	127.176	Arahy.08	50814017		b	a	a	a	a	b	b	a	b	b	b	b	b	b	b	b	a	h	a	b	a	b	a	b	a	a	b	a	b	b	a	b	b	a	a	a	a	h	a	b	a	a	a
A08	AX-176809087	AX-176809087_A08	127.726	Arahy.08	50896973		b	a	a	a	a	b	b	a	b	b	b	b	b	b	b	b	a	h	a	b	a	h	a	b	a	a	b	a	b	b	a	b	b	a	a	a	a	h	a	b	a	a	a
A08	AX-147231998	AX-147231998_B10	128.613	Arahy.08	1130202		b	a	a	a	a	b	b	a	b	b	b	b	b	b	b	b	a	a	a	b	a	h	a	b	a	a	h	a	b	b	a	b	b	a	a	a	a	h	a	b	a	a	a
A08	AX-147228923	AX-147228923_A08	129.163	Arahy.08	51293579		b	a	a	a	a	b	b	a	b	b	b	b	b	b	b	b	a	a	a	b	a	h	a	b	a	a	a	a	b	b	a	b	b	a	a	a	a	h	a	b	a	a	a
A08	AX-176821672	AX-176821672_A08	129.211	Arahy.08	51293132		b	a	a	a	a	b	b	a	b	b	b	b	b	b	b	b	a	a	a	b	a	h	a	b	a	a	-	a	b	b	a	b	b	a	a	a	a	h	a	b	a	a	a
A08	AX-177638124	AX-177638124_A08	129.271	Arahy.08	51465904		b	a	a	a	a	b	b	a	b	b	b	b	b	b	b	b	a	a	a	b	a	h	a	b	a	a	h	a	b	b	a	b	b	a	a	a	a	h	a	b	a	a	a
A08	AX-176821868	AX-176821868_A08	129.488	Arahy.08	51448028		b	a	a	a	a	b	b	a	b	b	b	h	b	-	b	-	a	a	a	b	a	h	a	b	a	a	h	a	b	b	a	b	b	a	a	a	a	h	a	h	a	a	a
A08	AX-147228925	AX-147228925_A08	129.82	Arahy.08	51293255		b	a	a	a	a	b	b	a	b	b	b	b	b	b	b	b	a	a	a	b	a	-	a	b	a	a	h	a	b	b	a	b	b	a	a	a	a	h	a	h	a	a	a
A08	AX-176815401	AX-176815401_A08	130.735	Arahy.08	51509661		b	a	-	a	a	b	b	a	b	b	b	b	b	b	b	b	a	a	a	b	a	-	a	b	a	a	h	a	b	b	a	b	b	a	a	a	a	h	a	b	-	a	a
A09_1	AX-177644544	AX-177644544_A09	0	Arahy.09	120159478		b	a	a	a	a	b	b	-	b	a	h	b	b	b	a	-	b	a	a	b	b	b	a	b	a	b	a	h	a	a	a	a	a	b	b	b	b	h	a	b	a	a	h
A09_1	AX-176799547	AX-176799547_A09	0.331	Arahy.09	120159408		b	a	a	a	a	b	b	a	b	a	h	b	b	b	a	a	b	a	a	b	b	b	a	b	a	b	a	h	a	a	a	a	a	b	b	b	b	a	a	b	a	a	h
A09_1	AX-176819477	AX-176819477_A09	0.439	Arahy.09	120151536		b	a	a	a	a	b	b	a	b	a	h	b	b	b	a	a	b	a	a	b	b	b	a	b	a	b	a	h	a	a	a	a	a	b	h	b	b	a	a	b	a	a	h
A09_1	AX-176821909	AX-176821909_A09	0.564	Arahy.09	120151572		b	a	a	a	a	b	b	a	b	a	h	b	b	b	a	a	b	a	a	b	b	b	a	b	a	b	a	h	a	a	a	a	a	b	b	b	b	a	a	b	a	a	h
A09_1	AX-176804641	AX-176804641_A09	1.32	Arahy.09	119985496		b	a	a	a	a	b	b	a	b	a	h	b	b	b	a	a	b	a	a	b	b	b	a	b	a	b	a	h	a	a	a	a	a	b	b	b	b	a	a	b	a	a	h
A09_1	AX-176824197	AX-176824197_A09	1.428	Arahy.09	119985566		b	a	a	a	a	b	b	a	b	a	h	b	b	b	a	a	b	a	a	b	b	b	a	b	a	b	a	h	a	a	a	a	a	b	b	b	b	a	a	b	a	a	h
A09_1	AX-177639433	AX-177639433_A09	1.755	Arahy.09	119909170		b	a	a	a	a	b	b	a	b	a	h	b	b	b	a	a	b	a	a	b	b	b	a	b	a	b	a	h	a	a	a	a	a	b	b	b	b	a	a	b	a	a	h
A09_1	AX-177637161	AX-177637161_A09	2.755	Arahy.09	119670059		b	a	a	a	a	b	b	a	b	a	h	b	b	b	a	a	b	a	a	b	b	b	a	b	a	b	a	h	h	a	a	b	a	b	b	b	b	a	a	b	a	a	h
A09_1	AX-147234802	AX-147234802_A09	2.973	Arahy.09	119529945		b	a	a	a	a	b	b	a	b	a	h	b	b	b	a	a	b	a	a	b	b	b	a	b	a	b	a	h	h	a	a	b	a	b	b	b	b	a	a	b	a	a	b
A09_1	AX-177639032	AX-177639032_A09	4.09	Arahy.09	119347260		b	a	a	a	a	b	b	a	b	a	h	b	b	b	a	a	b	a	a	b	a	b	a	b	a	b	a	h	h	a	a	b	a	b	b	b	b	a	a	b	a	a	b
A09_1	AX-176821658	AX-176821658_A09	10.815	Arahy.09	118475275		b	a	a	a	a	b	a	a	b	a	h	b	b	b	a	a	b	a	a	b	a	b	a	b	a	b	a	a	a	a	a	-	b	b	b	b	b	a	a	a	a	b	b
A09_2	AX-176821133	AX-176821133_A09	0	Arahy.09	103330897		b	a	a	a	a	b	b	a	b	a	a	a	b	b	b	b	a	a	b	b	a	b	b	b	a	a	a	b	b	a	b	b	a	b	b	b	a	b	b	b	a	b	b
A09_2	AX-176823098	AX-176823098_A09	1.7	Arahy.09	64747472		b	a	a	a	a	b	a	a	a	a	a	a	b	b	b	b	a	a	b	b	a	b	b	b	a	a	a	b	b	a	b	b	a	b	b	b	a	b	b	b	a	b	b
A09_2	AX-177639559	AX-177639559_A09	2.027	Arahy.09	65596640		b	a	a	a	a	b	a	a	a	a	a	a	b	b	b	b	a	a	b	b	a	b	b	b	a	a	a	b	b	a	b	b	a	b	b	b	a	b	b	b	a	b	b
A09_2	AX-176820221	AX-176820221_A09	2.372	Arahy.09	83579481		b	a	a	a	a	b	a	a	a	a	a	a	b	b	b	b	a	a	b	b	a	b	b	b	a	a	a	b	b	a	b	b	a	b	b	b	a	b	b	b	a	b	b
A09_2	AX-177639916	AX-177639916_A09	6.604	Arahy.09	15548943		b	a	a	a	a	b	a	a	a	a	a	a	b	b	b	b	a	a	b	b	a	b	b	b	a	a	a	b	b	a	h	b	a	b	b	b	a	b	b	b	a	b	b
A09_2	AX-176819328	AX-176819328_A09	29.274	Arahy.09	3782990		b	a	a	b	b	b	a	a	a	b	a	b	b	b	a	a	h	b	b	b	b	b	b	a	a	b	a	b	b	a	a	a	a	b	a	b	a	b	b	a	a	b	b
A10	AX-176819389	AX-176819389_A10	0	Arahy.10	1569492		b	b	a	a	a	b	b	a	b	-	b	a	a	a	h	b	b	b	b	a	-	a	h	a	a	b	b	b	b	a	b	-	b	a	b	b	a	a	h	a	b	b	a
A10	AX-147263082	AX-147263082_A10	1.497	Arahy.10	1633963		b	b	a	a	a	b	b	a	b	b	b	a	a	a	h	b	b	b	b	a	h	a	h	a	a	b	b	b	b	a	b	h	b	a	b	b	a	a	h	a	b	b	a
A10	AX-147234967	AX-147234967_A10	1.824	Arahy.10	1649507		b	b	a	a	a	b	b	a	b	b	b	a	a	a	h	b	b	b	b	a	h	a	h	a	a	b	b	b	b	a	b	h	b	a	b	b	a	a	h	a	b	b	a
A10	AX-147234968	AX-147234968_A10	3.646	Arahy.10	1674409		b	b	a	a	a	b	a	a	b	b	b	a	a	a	h	b	b	b	b	a	h	a	h	a	a	b	b	b	b	a	b	h	b	a	b	b	a	a	h	a	b	b	a
A10	AX-177642606	AX-177642606_A10	6.699	Arahy.10	1819836		b	b	a	a	a	b	a	a	b	b	b	a	a	a	a	b	b	b	b	b	h	a	h	a	a	a	b	b	b	a	b	h	b	a	b	b	a	a	h	a	b	b	a
A10	AX-147235014	AX-147235014_A10	9.378	Arahy.10	2244823		b	b	a	a	a	b	a	a	b	b	b	a	b	a	a	b	b	b	b	b	h	a	b	a	a	a	b	b	b	a	a	h	b	a	b	b	a	b	h	b	b	b	a
A10	AX-147235016	AX-147235016_A10	10.966	Arahy.10	2301114		b	b	a	a	a	b	a	a	b	b	b	a	b	a	a	b	b	b	b	b	h	a	b	a	a	a	b	h	b	a	a	h	b	a	b	h	a	b	h	b	b	b	a
A10	AX-177642176	AX-177642176_A10	12.389	Arahy.10	2350885		b	b	a	a	a	b	a	b	b	b	b	a	b	a	a	b	b	b	b	b	h	a	b	a	a	a	b	h	b	a	a	h	b	a	b	b	a	b	h	b	b	b	a
A10	AX-147263160	AX-147263160_A10	13.09	Arahy.10	2394831		b	b	a	a	a	b	a	b	b	b	b	h	b	a	a	b	b	b	b	b	h	a	b	a	a	a	b	h	b	a	a	h	b	a	b	b	a	b	h	b	b	b	a
A10	AX-147235031	AX-147235031_A10	14.91	Arahy.10	2416662		b	b	a	a	a	b	a	b	b	b	b	h	b	a	a	b	b	a	b	a	h	a	b	a	a	a	b	h	b	a	a	a	b	a	b	b	a	b	h	b	b	b	a
A10	AX-177638671	AX-177638671_A10	15.237	Arahy.10	2443455		b	b	a	a	a	b	a	b	b	b	b	h	b	a	a	b	b	a	b	a	h	a	b	a	a	a	b	h	b	a	a	a	b	a	b	b	a	b	h	b	b	b	a
A10	AX-177641924	AX-177641924_A10	15.898	Arahy.10	2565015		b	b	a	a	a	b	a	b	b	b	b	h	b	a	a	b	b	a	b	a	h	a	b	a	a	a	b	h	b	a	a	a	b	a	b	b	a	b	h	b	b	b	a
A10	AX-177638515	AX-177638515_A10	16.115	Arahy.10	2798508		b	b	a	a	a	b	a	b	b	b	b	h	b	a	a	b	b	a	b	a	h	a	b	a	a	a	b	h	b	a	a	a	b	a	b	b	a	b	h	b	b	b	a
A10	AX-176823907	AX-176823907_A10	20.766	Arahy.10	3026330		b	b	h	a	a	b	a	b	a	b	b	h	b	a	a	b	a	a	b	a	b	a	b	a	a	a	b	a	b	a	a	b	b	a	b	b	a	b	h	b	b	b	a
A10	AX-177639716	AX-177639716_A10	20.984	Arahy.10	3229329		b	b	h	a	a	b	a	b	a	b	b	h	b	a	a	b	a	a	b	a	b	a	b	a	a	a	h	a	b	a	a	b	b	a	b	b	a	b	h	b	b	b	a
A10	AX-176823716	AX-176823716_A10	22.691	Arahy.10	3576901		b	b	h	a	a	b	a	b	a	b	b	h	b	b	a	b	a	a	b	a	b	a	b	a	b	a	h	a	b	a	a	b	b	a	b	b	a	b	h	b	b	b	a
A10	AX-177639954	AX-177639954_A10	33.499	Arahy.10	5691384		b	b	h	b	a	b	a	b	a	b	b	h	b	a	a	b	a	a	b	a	b	h	b	a	b	a	a	a	b	a	b	a	b	a	b	b	a	b	h	b	b	b	a
A10	AX-177639950	AX-177639950_A10	37.472	Arahy.10	6636522		b	b	h	b	a	a	a	b	a	b	a	h	h	a	a	b	a	a	a	a	b	h	b	a	b	a	a	a	b	b	b	a	b	a	b	a	a	b	h	b	b	b	a
A10	AX-177639376	AX-177639376_A10	39.657	Arahy.10	8296777		b	b	h	b	a	a	a	b	a	b	a	h	h	a	a	b	a	a	a	a	b	a	b	a	b	a	a	a	b	b	b	a	b	a	b	a	b	b	h	b	b	b	a
A10	AX-177638690	AX-177638690_A10	39.984	Arahy.10	8518799		b	b	a	b	a	a	a	b	a	b	a	h	h	a	a	b	a	a	a	a	b	a	b	a	b	a	a	a	b	b	b	a	b	a	b	a	b	b	h	b	b	b	a
A10	AX-177639404	AX-177639404_A10	41.683	Arahy.10	10325172		b	b	a	b	a	a	a	b	a	b	a	h	h	a	a	b	a	a	a	a	a	a	b	a	b	a	a	a	b	b	b	a	b	a	b	a	b	b	h	b	b	b	a
A10	AX-177639955	AX-177639955_A10	41.901	Arahy.10	10426993		b	b	a	b	a	a	a	b	a	b	a	h	h	a	a	b	a	a	a	a	a	a	b	a	b	a	a	a	b	b	b	a	b	a	b	a	b	b	h	b	b	b	a
A10	AX-177639391	AX-177639391_A10	42.887	Arahy.10	11442558		b	b	a	b	a	a	a	b	a	b	a	h	h	a	a	b	a	a	a	a	a	a	b	a	b	a	a	a	b	b	b	a	b	a	b	a	b	b	h	b	b	b	a
A10	AX-177639957	AX-177639957_A10	43.119	Arahy.10	11498877		b	b	a	b	a	a	a	h	a	b	a	h	h	a	a	b	a	a	a	a	a	a	b	a	b	a	a	a	b	b	b	a	b	a	b	a	b	b	h	b	b	b	a
A10	AX-176823217	AX-176823217_A10	45.059	Arahy.10	22155907		b	b	a	b	a	a	a	a	a	b	a	h	h	a	a	b	a	a	a	a	a	h	b	a	b	a	a	a	b	a	b	a	b	a	b	a	b	b	h	b	b	b	a
A10	AX-147235673	AX-147235673_A10	45.714	Arahy.10	20573566		b	b	a	b	a	a	a	b	a	b	a	h	h	a	a	-	-	a	-	a	a	h	b	a	b	a	a	h	b	a	-	a	b	a	b	a	b	b	-	b	-	b	a
A10	AX-147264107	AX-147264107_B10	47.543	Arahy.10	70077196		b	b	a	b	a	a	a	a	a	b	a	a	h	a	a	b	a	a	a	a	a	h	b	a	b	a	a	a	b	a	b	a	b	a	b	a	b	b	h	b	b	b	a
A10	AX-177640134	AX-177640134_A10	48.431	Arahy.10	47674512		b	b	a	b	a	a	a	a	a	b	a	a	h	a	a	b	a	a	a	a	a	h	b	a	b	a	a	a	b	a	b	a	b	a	b	a	b	b	h	b	b	b	a
A10	AX-177639985	AX-177639985_A10	48.761	Arahy.10	43624951		b	b	a	b	a	a	a	a	a	b	a	a	h	a	a	b	a	a	a	a	a	h	b	a	b	a	a	a	b	a	b	a	b	a	b	a	b	b	h	b	b	b	a
A10	AX-177639305	AX-177639305_A10	49.087	Arahy.10	39506389		b	b	a	b	a	a	a	a	h	b	a	h	h	a	a	b	a	a	a	a	a	h	b	a	b	a	a	a	b	a	b	a	b	a	b	a	b	b	h	b	b	b	a
A10	AX-176824031	AX-176824031_A10	49.524	Arahy.10	71657157		b	b	a	b	a	a	a	a	a	b	a	a	h	a	a	b	a	a	a	a	a	h	b	a	b	a	h	a	b	a	b	a	b	a	b	a	b	b	h	b	b	b	a
A10	AX-177638040	AX-177638040_A10	49.851	Arahy.10	86830152		b	b	a	b	a	a	a	a	a	b	a	a	h	a	a	b	a	a	a	a	a	h	b	a	b	a	h	a	b	a	b	a	b	a	b	a	b	b	h	b	b	b	a
A10	AX-176822735	AX-176822735_A10	51.209	Arahy.10	89241341		b	-	a	b	a	a	a	a	a	b	a	a	h	a	a	b	a	a	a	a	a	-	b	a	b	a	h	a	b	a	b	a	b	a	b	a	b	b	h	b	b	b	a
A10	AX-177637187	AX-177637187_A10	53.501	Arahy.10	96047882		b	b	a	b	a	-	a	a	-	b	a	a	-	a	a	b	a	a	a	a	a	h	a	a	b	a	h	a	b	a	b	a	b	-	b	a	b	b	h	b	b	b	a
A10	AX-147236251	AX-147236251_B10	54.078	Arahy.10	116623005		b	b	a	b	a	a	a	a	a	b	a	a	h	a	a	b	a	a	a	a	a	h	a	a	b	a	h	a	b	a	b	a	b	a	b	a	b	b	h	b	b	b	a
A10	AX-176818584	AX-176818584_A10	55.751	Arahy.10	103444204		b	b	a	b	a	a	a	a	a	b	a	a	h	a	a	b	a	a	a	a	a	h	a	a	b	a	h	a	b	a	b	a	b	h	b	a	b	b	h	b	b	b	a
A10	AX-176815561	AX-176815561_A10	56.214	Arahy.10	103959242		b	b	a	b	a	a	a	a	a	b	h	a	h	a	a	b	a	a	a	a	a	h	a	a	b	a	h	a	b	a	b	a	b	h	b	a	b	b	h	b	b	b	a
A10	AX-177639103	AX-177639103_A10	66.626	Arahy.10	111560308		b	b	a	b	b	a	a	a	a	b	b	a	a	a	a	b	a	a	b	a	h	h	a	a	b	a	h	a	b	a	b	a	b	h	b	a	b	h	b	b	b	b	a
B01	AX-176821732	AX-176821732_B01	0	Arahy.11	148813493		b	a	a	a	a	b	b	a	a	b	b	a	a	a	a	b	a	a	a	a	b	h	a	b	b	b	h	b	b	h	a	a	a	b	a	b	a	h	a	b	a	b	a
B01	AX-147239693	AX-147239693_B01	2.812	Arahy.11	148648360		b	a	a	a	a	b	b	h	a	b	b	a	a	a	a	b	a	a	a	a	b	h	a	b	b	b	h	b	b	h	a	b	a	b	a	b	a	h	a	b	a	b	a
B01	AX-147239645	AX-147239645_B01	8.497	Arahy.11	148207386		b	a	a	a	a	b	b	h	a	b	b	a	a	a	a	b	h	a	a	a	b	a	a	b	a	b	a	b	a	h	a	b	b	b	a	b	a	h	a	b	a	b	b
B01	AX-147239644	AX-147239644_B01	9.743	Arahy.11	148178205		b	a	a	a	a	b	b	b	a	b	b	a	a	a	a	b	h	a	a	a	a	a	a	b	a	b	a	b	a	h	a	b	b	b	a	b	a	h	a	b	a	b	b
B01	AX-176811427	AX-176811427_B01	60.065	Arahy.11	145478907		a	b	a	a	b	b	b	b	a	a	b	a	b	b	h	a	h	b	a	a	a	h	a	a	a	a	a	b	a	b	b	b	b	b	a	b	a	b	a	b	b	b	b
B01	AX-176799339	AX-176799339_B01	63.392	Arahy.11	141883127		a	b	a	a	b	b	b	b	a	b	b	a	b	b	b	a	h	a	a	a	a	h	a	a	a	a	a	b	a	b	b	b	b	b	a	b	a	b	a	b	b	b	b
B01	AX-176821077	AX-176821077_B01	63.501	Arahy.11	142002825		a	b	a	a	b	b	b	b	a	b	b	a	b	b	b	a	h	a	a	a	a	h	a	a	a	a	a	b	a	b	b	b	b	b	a	b	a	b	a	b	b	b	b
B01	AX-176824000	AX-176824000_B01	63.718	Arahy.11	141738603		a	b	a	a	b	b	b	b	a	b	b	a	b	b	b	a	h	a	a	a	a	h	a	a	a	a	a	b	a	b	b	b	b	b	a	b	a	b	a	b	b	b	b
B01	AX-176797129	AX-176797129_B01	64.653	Arahy.11	141370116		-	b	a	-	b	b	b	b	a	b	b	a	b	b	b	a	h	-	-	-	a	-	-	a	a	-	a	b	-	b	b	b	b	b	a	b	-	b	a	b	b	b	b
B01	AX-176804993	AX-176804993_B01	65.59	Arahy.11	141204495		a	b	a	a	b	b	b	b	a	b	b	a	b	b	b	a	h	a	a	a	a	h	a	a	a	a	a	b	a	b	b	b	b	b	a	b	a	b	a	b	b	b	b
B01	AX-176821725	AX-176821725_B01	65.939	Arahy.11	141223615		a	b	a	a	b	b	b	b	a	b	b	h	b	b	b	a	h	a	a	a	-	h	a	a	a	a	a	b	a	b	b	b	b	b	a	b	a	b	a	b	b	b	b
B01	AX-147211846	AX-147211846_B01	66.487	Arahy.11	141197257		a	b	a	a	b	b	b	b	a	b	b	a	b	b	b	a	h	a	a	a	a	h	a	a	a	a	a	b	a	b	b	b	b	b	a	b	a	b	a	b	b	b	b
B01	AX-176823342	AX-176823342_B01	67.265	Arahy.11	141223545		a	b	a	a	b	b	b	b	a	b	b	a	b	b	b	a	h	a	a	a	a	h	a	a	a	a	a	b	a	b	b	b	b	b	a	b	a	b	a	b	b	b	b
B01	AX-176794826	AX-176794826_B01	67.921	Arahy.11	141195121		a	-	a	a	b	b	b	b	a	b	h	a	b	b	b	a	h	a	a	a	a	h	a	a	a	a	a	b	a	b	b	b	-	b	a	b	a	b	a	b	b	b	b
B01	AX-147211853	AX-147211853_B01	68.248	Arahy.11	141025639		a	b	a	a	b	b	b	b	a	b	b	a	b	b	b	a	h	a	a	a	a	h	a	a	a	a	a	b	a	b	b	b	b	b	a	b	a	b	a	b	b	b	b
B01	AX-176823498	AX-176823498_B01	69.879	Arahy.11	140483367		a	b	a	a	b	b	b	b	a	b	b	h	b	b	b	a	-	-	a	h	a	h	a	a	a	a	h	b	-	b	b	b	b	b	h	b	h	b	-	b	b	b	b
B01	AX-176792451	AX-176792451_B01	71.277	Arahy.11	139254691		a	b	a	a	b	b	b	b	a	b	b	b	b	b	b	a	h	a	a	a	a	h	a	a	a	a	a	b	a	b	b	b	b	b	a	b	a	b	a	b	b	b	b
B01	AX-176806555	AX-176806555_B01	73.528	Arahy.11	139436557		a	b	-	a	b	b	b	b	a	b	b	b	b	b	b	a	h	a	a	a	a	h	a	a	a	a	a	b	-	b	b	b	b	b	a	b	a	b	a	b	b	b	b
B01	AX-176810889	AX-176810889_B01	75.842	Arahy.11	139695687		a	b	a	a	b	b	b	b	a	b	b	b	b	b	b	a	h	a	a	a	a	h	a	a	a	a	a	b	a	b	b	b	b	b	a	b	a	b	a	b	b	b	b
B01	AX-176801740	AX-176801740_B01	75.842	Arahy.11	139436628		a	b	a	a	b	b	b	b	a	b	b	b	b	b	b	a	h	a	a	a	a	h	a	a	a	a	a	b	-	b	b	b	b	b	a	b	a	b	a	b	b	b	b
B01	AX-176816509	AX-176816509_B01	75.951	Arahy.11	140058560		a	b	a	a	b	b	b	b	a	b	b	b	b	b	b	a	h	a	a	a	a	b	a	a	a	a	a	b	a	b	b	b	b	b	a	b	a	b	a	b	b	b	b
B01	AX-176800888	AX-176800888_B01	76.059	Arahy.11	139214628		a	b	a	a	b	b	b	b	a	b	b	b	b	b	b	a	h	a	a	a	a	h	a	a	a	a	a	b	a	b	b	b	b	b	a	b	a	b	a	b	b	b	b
B01	AX-176799233	AX-176799233_B01	76.167	Arahy.11	139646197		a	b	a	a	b	b	b	b	a	b	b	b	b	b	b	a	h	a	a	a	a	h	a	a	a	a	a	b	a	b	b	b	b	b	a	b	a	b	a	b	b	b	b
B01	AX-176803831	AX-176803831_B01	77.039	Arahy.11	139033791		a	b	a	a	b	b	b	b	a	b	b	b	b	b	b	a	h	a	a	a	a	h	a	a	a	a	a	b	b	b	b	b	b	b	a	b	a	b	a	b	b	b	b
B01	AX-147239102	AX-147239102_B01	77.163	Arahy.11	137268002		a	b	a	a	b	b	b	b	a	b	b	b	b	b	b	a	h	a	a	a	a	h	a	a	a	a	a	b	b	b	b	b	b	b	a	b	a	b	a	b	b	b	b
B01	AX-177640138	AX-177640138_B01	77.272	Arahy.11	138911143		a	b	a	a	b	b	b	b	a	b	b	b	b	b	b	a	h	a	a	a	a	h	a	a	a	a	a	b	b	b	b	b	b	b	a	b	a	b	a	b	b	b	b
B01	AX-176804073	AX-176804073_B01	78.159	Arahy.11	136959185		a	b	a	a	b	b	b	b	a	b	b	b	b	b	b	a	h	a	a	a	a	h	a	a	a	a	a	b	b	b	b	b	b	b	a	b	a	b	a	b	b	b	b
B01	AX-176820640	AX-176820640_B01	78.486	Arahy.11	135669410		a	b	a	a	b	b	b	b	a	b	b	b	b	b	b	a	h	a	a	a	a	h	a	a	a	a	a	b	b	b	b	b	b	b	a	b	a	b	a	b	b	b	b
B01	AX-176796247	AX-176796247_B01	78.489	Arahy.11	135590373		a	b	a	-	b	b	b	b	a	b	b	b	b	b	b	a	h	-	a	a	a	h	a	a	a	a	a	b	b	b	b	b	b	b	a	b	a	b	a	b	b	b	b
B01	AX-147238973	AX-147238973_B01	78.814	Arahy.11	134271829		a	b	a	h	b	b	b	a	a	b	b	b	b	b	b	a	h	a	a	a	a	h	a	a	a	a	a	b	b	b	b	b	b	b	a	b	a	b	a	b	b	b	b
B01	AX-176804826	AX-176804826_B01	79.243	Arahy.11	133918509		a	b	a	h	b	b	b	a	a	b	b	b	b	b	b	a	h	a	a	a	a	h	a	a	a	a	a	b	b	b	b	b	b	b	a	b	a	b	a	b	b	b	b
B01	AX-176821301	AX-176821301_B01	79.256	Arahy.11	133967000		a	b	a	h	b	b	b	a	a	b	b	b	b	-	b	a	h	a	a	a	a	h	a	a	a	a	a	b	b	b	b	b	b	b	a	b	a	b	a	b	b	b	b
B01	AX-176823075	AX-176823075_B01	79.691	Arahy.11	132562082		a	b	a	h	b	b	b	a	a	b	b	b	b	b	b	a	h	a	a	a	a	h	a	a	a	a	a	h	b	b	b	b	b	b	a	b	a	b	a	b	b	b	b
B01	AX-176823353	AX-176823353_B01	79.799	Arahy.11	132279717		a	b	a	h	b	b	b	a	a	b	b	-	b	b	b	a	h	a	a	a	a	h	a	a	a	a	a	h	b	b	b	b	b	b	a	b	a	b	a	b	b	b	b
B01	AX-176809263	AX-176809263_B01	80.801	Arahy.11	126837115		a	b	a	h	b	b	b	a	a	b	b	b	b	b	a	a	h	a	a	a	a	h	a	a	a	a	a	b	b	b	b	b	b	b	a	b	a	b	a	b	b	b	b
B01	AX-176823011	AX-176823011_B01	81.577	Arahy.11	126358628		a	h	a	h	b	b	b	a	a	b	b	b	b	-	a	a	-	a	a	a	a	-	a	a	a	h	a	b	b	b	b	b	b	b	a	b	a	b	a	b	b	b	b
B01	AX-176823238	AX-176823238_B01	83.159	Arahy.11	128395185		a	b	a	h	b	b	b	a	a	b	b	b	b	b	a	a	h	a	a	a	a	-	a	a	a	a	a	-	b	b	b	b	b	b	a	b	a	b	a	h	h	b	h
B01	AX-176803921	AX-176803921_B01	84.507	Arahy.11	127147456		a	b	a	h	b	b	b	a	a	b	b	h	b	b	a	a	h	a	a	a	a	h	a	a	a	a	a	b	b	b	b	b	b	b	a	b	a	b	a	b	b	b	b
B01	AX-176808092	AX-176808092_B01	84.834	Arahy.11	127938425		a	b	a	h	b	b	b	a	a	b	b	h	b	b	a	a	h	a	a	a	a	h	a	a	a	a	a	b	b	b	b	-	b	b	a	b	a	b	a	b	b	b	b
B01	AX-147238790	AX-147238790_B01	85.494	Arahy.11	124737857		a	b	a	h	b	b	b	a	a	b	b	b	b	b	a	a	h	a	a	a	a	h	a	a	a	a	a	b	b	b	h	b	b	b	a	b	a	b	a	b	b	b	b
B01	AX-176797600	AX-176797600_B01	86.043	Arahy.11	124857748		a	b	a	h	b	b	b	a	a	b	b	-	b	b	a	a	h	a	a	a	a	h	a	a	a	a	a	b	b	b	b	b	b	b	a	b	a	b	a	b	b	b	b
B01	AX-176823681	AX-176823681_B01	86.37	Arahy.11	125523241		a	b	a	h	b	b	b	a	a	b	b	b	b	b	a	a	h	a	a	a	a	h	a	a	a	a	a	b	b	b	b	b	b	b	a	b	a	b	a	b	b	b	b
B01	AX-147238787	AX-147238787_A01	86.536	Arahy.11	110961428		a	b	a	-	b	b	b	a	a	b	b	b	b	b	a	a	h	a	a	a	a	h	a	a	a	a	a	b	b	b	b	b	b	b	a	b	a	b	a	b	b	b	b
B01	AX-147212082	AX-147212082_A01	86.697	Arahy.11	110960782		a	b	a	h	b	b	b	a	a	b	b	b	b	b	a	a	h	a	a	a	a	h	a	a	a	a	a	b	b	b	b	b	b	b	a	b	a	b	a	b	b	b	b
B01	AX-176792577	AX-176792577_B01	87.022	Arahy.11	126838095		a	b	a	h	b	b	b	a	a	b	b	b	b	b	a	a	h	a	a	a	a	h	a	a	a	a	a	b	b	b	b	b	b	b	a	b	a	b	a	b	b	b	b
B01	AX-176818179	AX-176818179_B01	87.024	Arahy.11	129012383		a	b	a	h	b	b	b	a	a	b	b	b	b	b	a	a	h	a	a	a	a	h	a	a	a	a	a	b	b	b	b	b	b	b	a	b	a	b	a	b	b	b	b
B01	AX-176819274	AX-176819274_B01	87.024	Arahy.11	127839587		a	b	a	h	b	b	b	a	a	b	b	b	b	b	a	a	h	a	a	a	a	h	a	a	a	a	a	b	b	b	b	b	b	b	a	b	a	b	a	b	b	b	b
B01	AX-176824003	AX-176824003_B01	87.133	Arahy.11	128549843		a	b	a	h	b	b	b	a	a	b	b	b	b	b	a	a	b	a	a	a	a	h	a	a	a	a	a	b	b	b	b	b	b	b	a	b	a	b	a	b	b	b	b
B01	AX-176812694	AX-176812694_B01	87.35	Arahy.11	126732711		a	h	a	h	b	b	b	a	a	b	b	b	b	b	a	a	h	a	a	a	a	h	a	a	a	a	a	b	b	b	b	b	b	b	a	b	a	b	a	b	b	b	b
B01	AX-176803768	AX-176803768_B01	87.568	Arahy.11	126153937		a	b	a	h	b	b	b	a	a	b	b	b	b	b	a	a	h	a	a	a	a	h	a	a	a	a	a	b	b	b	h	b	b	b	a	b	a	b	a	b	b	b	b
B01	AX-176812636	AX-176812636_B01	87.676	Arahy.11	129920691		a	b	a	-	b	b	b	a	a	b	b	b	b	b	a	a	h	a	a	a	a	h	a	a	a	a	a	b	b	b	h	b	b	b	a	b	a	b	a	b	b	b	b
B01	AX-176794032	AX-176794032_B01	87.893	Arahy.11	126450502		a	b	a	h	b	b	b	a	a	b	b	b	b	b	a	a	h	a	a	a	a	h	a	a	a	a	a	b	b	b	b	b	b	b	a	b	a	b	a	b	b	b	b
B01	AX-176824263	AX-176824263_B01	88.111	Arahy.11	124775394		a	b	a	h	b	b	b	a	a	b	b	b	b	b	a	a	h	a	a	a	a	h	a	a	a	a	a	b	b	b	b	b	b	b	a	b	a	b	a	b	b	b	b
B01	AX-176820327	AX-176820327_B01	88.111	Arahy.11	124775324		a	b	a	h	b	b	b	a	a	b	b	b	b	b	a	a	h	a	a	a	a	h	a	a	a	a	a	b	b	b	-	b	b	b	a	b	a	b	a	b	b	b	b
B01	AX-176813156	AX-176813156_B01	88.111	Arahy.11	125468009		a	b	a	h	b	b	b	a	a	b	b	b	b	b	a	a	h	a	a	a	a	h	a	a	a	a	a	b	b	b	b	b	b	b	a	b	a	b	a	b	b	b	b
B01	AX-176822292	AX-176822292_B01	88.111	Arahy.11	124698341		a	b	a	h	b	b	b	a	a	b	-	b	b	b	a	a	-	a	a	a	a	h	a	a	a	a	a	b	b	b	b	b	b	b	a	b	a	b	a	b	b	b	b
B01	AX-147233425	AX-147233425_B01	88.111	Arahy.11	125328322		a	b	a	h	b	b	b	a	a	b	b	b	b	b	a	a	h	a	a	a	a	h	a	a	a	a	a	b	b	b	b	b	b	b	a	b	a	b	a	b	b	b	b
B01	AX-176793348	AX-176793348_B01	88.544	Arahy.11	125144062		a	b	a	h	b	b	b	a	a	b	b	b	b	b	a	h	-	a	a	a	-	h	a	a	a	a	a	b	b	b	-	b	b	b	a	b	a	b	a	b	b	b	b
B01	AX-176806559	AX-176806559_B01	88.992	Arahy.11	124548532		a	b	a	h	b	b	b	a	a	b	b	b	b	b	a	a	h	a	a	a	b	h	a	a	a	a	a	b	b	b	b	b	b	b	a	b	a	b	a	b	b	b	b
B01	AX-176811542	AX-176811542_B01	89.1	Arahy.11	124240973		a	b	a	h	b	b	b	a	a	b	b	b	b	b	a	a	h	a	a	a	b	h	a	a	a	a	a	b	b	h	b	b	b	b	a	b	a	b	a	b	b	b	b
B01	AX-176822819	AX-176822819_B01	89.209	Arahy.11	124226923		a	b	a	h	b	b	b	a	a	b	b	b	b	b	a	a	h	a	a	a	b	h	a	a	a	a	a	b	b	b	b	b	b	b	a	b	a	b	a	b	b	b	b
B01	AX-147238779	AX-147238779_B01	89.317	Arahy.11	124111396		a	h	a	h	b	b	b	a	a	b	b	b	b	b	a	a	h	a	a	a	b	h	a	a	a	a	a	b	b	b	b	b	b	b	a	b	a	b	a	b	b	b	b
B01	AX-176818385	AX-176818385_B01	89.534	Arahy.11	124097102		a	h	a	h	b	b	b	a	a	b	b	h	b	b	a	a	h	a	a	a	b	a	a	a	a	a	a	b	b	b	b	b	b	b	a	b	a	b	a	-	b	b	b
B01	AX-176807152	AX-176807152_B01	89.752	Arahy.11	116773568		a	h	a	h	b	b	b	a	a	b	b	h	b	b	a	a	h	a	a	a	b	h	a	a	a	a	a	b	b	b	b	b	b	b	a	b	a	b	a	b	b	b	b
B01	AX-176817560	AX-176817560_B01	89.86	Arahy.11	113103582		a	h	a	h	b	b	b	a	a	b	b	h	b	b	a	a	h	a	a	a	b	h	a	a	a	a	a	b	b	b	b	b	b	b	a	b	a	b	a	b	b	b	b
B01	AX-176820159	AX-176820159_B01	90.022	Arahy.11	123740160		a	h	a	h	b	b	b	a	a	b	b	b	b	b	a	a	h	a	a	a	b	h	a	a	a	a	a	b	b	b	b	b	b	b	a	b	a	b	a	b	b	b	b
B01	AX-176816500	AX-176816500_B01	90.186	Arahy.11	117467951		a	h	a	h	b	b	b	a	a	b	b	b	b	b	a	a	h	a	a	a	b	h	a	a	a	a	a	b	b	b	b	b	b	b	a	b	a	b	a	b	b	b	b
B01	AX-147218225	AX-147218225_B01	90.403	Arahy.11	117343808		a	h	a	h	b	b	b	a	a	b	b	b	b	b	a	a	h	a	a	a	b	h	a	a	a	a	a	b	b	b	b	b	b	b	a	b	a	b	a	b	b	b	b
B01	AX-176811492	AX-176811492_B01	90.621	Arahy.11	113742257		a	h	a	h	b	b	b	a	a	b	b	b	b	b	a	a	h	a	a	-	b	h	a	a	a	a	a	b	b	b	b	b	b	b	a	b	a	b	a	b	b	b	b
B01	AX-176797473	AX-176797473_B01	90.729	Arahy.11	118882174		a	h	a	h	b	b	b	a	a	b	b	b	b	b	a	a	h	a	a	a	b	h	a	a	a	a	a	b	b	b	b	b	b	b	a	b	a	b	a	b	b	b	b
B01	AX-176793575	AX-176793575_B01	90.947	Arahy.11	115964859		a	h	a	h	b	b	b	a	a	b	b	b	b	b	a	a	h	a	a	a	b	h	a	a	a	a	a	b	b	-	b	b	b	b	a	b	a	b	a	b	b	b	b
B01	AX-147238672	AX-147238672_A01	91.164	Arahy.11	87382228		a	h	a	h	b	b	b	a	a	b	b	b	b	b	a	a	h	a	a	a	b	h	a	a	a	a	a	b	b	b	b	b	b	b	a	b	a	b	a	b	b	b	b
B01	AX-176801952	AX-176801952_B01	91.416	Arahy.11	123295263		a	a	a	-	b	b	b	a	a	b	b	b	b	b	a	a	h	a	a	a	b	h	a	a	a	a	a	b	b	b	b	b	b	b	a	b	a	b	a	b	b	b	b
B01	AX-176819319	AX-176819319_B01	91.931	Arahy.11	117160960		a	b	a	h	b	b	b	a	a	b	b	b	b	b	-	a	-	a	a	a	b	h	-	a	a	a	a	b	-	b	b	b	b	b	a	b	a	b	a	b	b	b	b
B01	AX-176810249	AX-176810249_B01	92.228	Arahy.11	122972531		a	h	a	h	b	b	b	-	a	b	b	b	b	b	a	a	h	a	a	a	b	h	a	a	a	a	a	b	b	b	b	b	b	b	a	b	a	b	a	-	b	b	b
B01	AX-147238696	AX-147238696_B01	92.62	Arahy.11	113753256		a	h	a	-	b	b	b	a	a	b	b	b	b	b	a	a	h	a	a	a	b	h	a	a	a	a	a	b	b	b	b	b	b	b	a	b	a	b	a	b	b	b	b
B01	AX-176797375	AX-176797375_B01	92.918	Arahy.11	123575944		a	h	a	h	b	b	b	a	a	b	b	b	b	b	a	a	h	a	a	a	b	h	a	a	a	a	a	b	b	b	b	b	b	b	a	b	a	b	a	b	b	b	b
B01	AX-176807309	AX-176807309_B01	92.918	Arahy.11	120684716		a	h	a	h	b	b	b	a	a	b	b	b	b	b	a	a	h	a	a	a	b	h	a	a	a	a	a	b	b	-	b	b	b	b	a	b	a	b	a	b	b	b	b
B01	AX-176806784	AX-176806784_B01	92.938	Arahy.11	119711007		a	h	a	h	b	b	b	a	a	b	b	b	b	b	a	a	h	a	a	a	b	-	a	a	a	a	a	b	b	b	b	b	b	b	a	b	a	b	a	b	b	b	b
B01	AX-176821617	AX-176821617_B01	93.044	Arahy.11	123538356		a	h	a	h	b	b	b	a	a	b	b	b	b	b	a	a	-	a	a	a	b	b	a	a	a	a	a	b	b	b	b	b	b	b	a	b	a	b	a	b	b	b	b
B01	AX-176820497	AX-176820497_B01	93.54	Arahy.11	113714539		a	-	a	h	b	b	b	a	a	b	-	-	b	b	a	a	h	a	-	a	b	b	a	a	a	a	a	b	b	b	b	b	b	h	a	b	a	b	a	b	b	b	b
B01	AX-176804260	AX-176804260_B01	94.62	Arahy.11	123923013		a	h	a	-	b	b	b	a	a	b	b	b	b	b	a	a	h	a	a	a	b	b	a	a	a	a	a	b	b	b	b	b	b	b	a	b	a	b	a	b	b	b	b
B01	AX-176820564	AX-176820564_B01	96.923	Arahy.11	70522124		a	-	a	b	b	b	b	a	a	b	b	h	b	b	a	a	h	a	a	a	b	h	a	a	a	a	a	b	-	b	-	b	b	-	-	b	a	b	a	b	b	b	b
B01	AX-176817247	AX-176817247_B01	98.379	Arahy.11	98982234		a	h	a	b	h	b	b	a	a	b	b	b	b	b	a	a	-	a	a	a	b	-	a	a	a	a	a	b	b	b	b	-	b	b	a	b	a	b	a	-	b	b	-
B01	AX-176821459	AX-176821459_B01	99.36	Arahy.11	99113608		a	b	a	b	b	b	b	a	a	b	b	b	b	b	a	a	b	a	a	a	b	b	a	a	a	a	a	b	b	b	b	b	b	b	a	b	a	b	a	b	b	b	b
B01	AX-176807904	AX-176807904_B01	101.084	Arahy.11	73396054		a	h	-	b	b	b	b	h	a	b	b	b	b	b	a	-	h	a	-	a	b	b	a	a	a	h	a	b	b	b	b	b	b	b	a	b	a	b	a	b	b	b	b
B01	AX-177639576	AX-177639576_B01	104.444	Arahy.11	98974525		a	-	a	b	b	b	b	a	a	b	b	b	b	b	a	a	-	a	a	a	b	-	a	a	a	a	h	b	b	b	b	b	b	b	a	b	a	b	a	b	b	b	b
B01	AX-176819299	AX-176819299_B01	108.335	Arahy.11	123935173		a	h	a	h	b	b	b	a	a	b	b	b	b	b	a	a	h	a	a	a	b	h	a	a	a	a	a	b	b	b	b	b	b	b	a	b	a	b	a	b	b	b	b
B01	AX-176808868	AX-176808868_B01	108.444	Arahy.11	124043152		a	h	a	h	b	b	b	a	a	b	b	b	b	b	a	-	h	a	a	a	b	h	a	a	a	a	a	b	b	b	b	b	b	b	a	b	a	b	a	b	b	b	b
B01	AX-176804146	AX-176804146_B01	108.444	Arahy.11	123389918		a	h	a	h	b	b	b	a	a	b	b	b	b	b	a	a	h	a	a	a	b	h	a	a	a	a	a	b	b	b	b	b	b	b	a	b	a	b	a	b	b	b	b
B01	AX-176810320	AX-176810320_B01	108.661	Arahy.11	123733569		a	h	a	h	b	b	b	a	a	b	b	b	b	b	a	a	h	a	a	a	b	h	a	a	a	a	a	b	b	b	b	b	b	b	a	b	a	b	a	b	b	b	b
B01	AX-176819887	AX-176819887_B01	108.661	Arahy.11	123733639		a	h	a	h	b	b	b	a	a	b	b	b	b	b	a	a	h	a	a	a	b	h	a	a	a	a	a	b	b	b	b	b	b	b	a	b	a	b	a	b	b	b	b
B01	AX-176812185	AX-176812185_B01	108.879	Arahy.11	121045705		a	h	a	h	b	b	b	a	a	b	b	b	b	b	a	a	h	a	a	a	b	h	a	a	a	a	a	b	b	b	b	b	b	b	a	b	a	b	a	b	b	b	b
B01	AX-176817651	AX-176817651_B01	109.096	Arahy.11	110355548		a	h	a	h	b	b	b	a	a	b	b	b	b	b	a	a	h	a	a	a	b	h	a	a	a	a	a	b	b	b	b	b	b	b	a	b	a	b	a	b	b	b	b
B01	AX-176816480	AX-176816480_B01	109.096	Arahy.11	109978171		a	h	a	h	b	b	b	a	a	b	b	b	b	b	a	a	h	a	a	a	b	h	a	a	a	a	a	b	b	b	b	b	b	b	a	b	a	b	a	b	b	b	b
B01	AX-176811056	AX-176811056_B01	109.205	Arahy.11	111595331		a	-	a	h	b	b	b	a	a	b	b	b	b	b	a	-	h	a	a	a	b	h	a	a	a	-	a	b	b	b	b	b	b	b	a	b	a	b	a	b	b	b	b
B01	AX-176818676	AX-176818676_B01	109.313	Arahy.11	110830175		a	h	a	h	b	b	b	a	a	b	b	b	b	b	a	a	h	a	a	a	b	h	a	a	a	a	a	b	b	b	b	b	b	b	a	b	a	b	a	b	b	b	b
B01	AX-176795185	AX-176795185_B01	109.313	Arahy.11	111601885		a	h	a	h	b	b	b	a	a	b	b	b	b	b	a	a	h	a	a	a	b	h	a	a	a	a	a	b	b	b	b	b	b	b	a	b	a	b	a	b	b	b	b
B01	AX-176792055	AX-176792055_B02	111.251	Arahy.11	105661990		a	a	a	b	b	b	b	a	a	b	b	b	b	b	a	a	a	a	a	a	b	a	a	a	a	a	a	b	b	b	b	b	b	b	a	b	a	b	a	b	b	b	b
B01	AX-147214591	AX-147214591_A02	112.665	Arahy.11	91350680		a	-	a	b	b	b	b	a	a	b	b	b	b	b	a	a	h	a	a	a	b	h	a	a	a	a	a	b	b	b	b	b	b	b	a	b	a	b	a	b	b	b	b
B01	AX-147238586	AX-147238586_B01	113.045	Arahy.11	87428245		a	h	a	b	b	b	b	a	a	b	b	b	b	b	a	a	h	a	a	a	b	h	a	a	a	a	a	b	b	b	b	b	b	b	a	b	a	b	a	b	b	b	b
B01	AX-147238590	AX-147238590_B01	113.153	Arahy.11	76138444		a	h	a	b	b	-	b	a	a	b	b	b	b	b	a	a	h	a	a	a	b	h	a	a	a	a	a	b	b	b	b	b	b	b	a	h	a	b	a	b	b	b	b
B01	AX-176807777	AX-176807777_B01	113.371	Arahy.11	74176230		a	h	a	b	b	b	b	a	a	b	b	b	b	b	a	a	h	a	a	a	b	h	a	a	a	a	a	b	b	b	b	b	b	b	a	b	a	b	a	b	b	b	b
B01	AX-176795058	AX-176795058_B01	113.479	Arahy.11	89774611		a	h	a	b	b	b	b	a	a	b	b	b	b	b	a	a	h	a	a	a	b	h	a	a	a	a	a	b	b	b	b	b	b	b	a	b	a	b	a	b	b	b	b
B01	AX-176798707	AX-176798707_B01	113.697	Arahy.11	64627466		a	h	a	b	b	b	b	a	a	b	b	b	b	b	a	a	h	a	a	a	b	h	a	a	a	a	a	b	b	b	b	b	b	b	a	b	a	b	a	b	b	b	b
B01	AX-176818607	AX-176818607_B01	114.112	Arahy.11	109773940		a	h	-	b	b	-	b	a	a	b	b	h	b	b	a	-	-	a	a	a	b	h	a	a	a	a	a	b	b	b	b	b	b	b	a	-	a	b	a	-	b	b	-
B01	AX-176801628	AX-176801628_B01	115.278	Arahy.11	86095697		a	h	a	b	-	h	b	a	a	b	b	b	b	h	a	a	h	a	a	a	-	-	a	a	a	a	a	-	b	-	b	b	b	b	a	b	a	-	a	-	b	b	-
B01	AX-147238639	AX-147238639_A01	116.028	Arahy.11	81325000		a	h	a	b	b	b	b	a	a	b	b	b	b	b	a	a	h	a	a	a	b	h	a	a	a	a	a	b	b	b	b	b	b	b	a	b	a	b	a	b	b	b	b
B01	AX-176814711	AX-176814711_B01	116.216	Arahy.11	99113523		a	h	a	b	b	b	b	a	a	b	-	-	b	b	a	a	-	a	a	a	-	-	a	a	a	a	a	b	b	b	b	b	b	b	a	b	a	b	a	-	b	b	b
B01	AX-176816458	AX-176816458_B01	116.693	Arahy.11	74581944		a	h	a	b	b	b	b	a	a	b	b	b	b	b	a	a	a	a	a	a	b	h	a	a	a	a	a	b	b	b	b	b	b	b	a	b	a	b	a	h	b	b	b
B01	AX-176804574	AX-176804574_B01	117.379	Arahy.11	101215514		a	-	a	b	b	-	b	a	a	-	b	b	b	b	a	a	-	a	a	a	b	h	a	a	a	a	a	-	b	b	-	b	b	b	a	b	a	b	a	b	b	b	b
B01	AX-176805150	AX-176805150_B01	117.914	Arahy.11	88739028		a	h	a	b	b	b	b	a	a	b	b	b	b	b	a	a	-	a	a	a	b	h	a	a	a	a	a	b	b	b	b	b	b	b	a	b	a	b	a	b	b	b	b
B01	AX-176810927	AX-176810927_B01	117.914	Arahy.11	71957779		a	h	a	b	b	b	b	a	a	b	b	b	b	b	a	a	h	a	a	a	b	h	a	a	a	a	a	b	b	b	b	b	b	b	a	b	a	b	a	b	b	b	b
B01	AX-176806459	AX-176806459_B01	118.022	Arahy.11	89990269		a	h	a	b	b	b	b	a	a	b	b	b	b	b	a	a	h	-	a	a	b	h	a	a	a	a	-	b	b	b	b	b	b	b	a	b	a	b	a	b	b	b	b
B01	AX-176793537	AX-176793537_B01	118.131	Arahy.11	84166509		a	h	a	b	b	b	b	a	a	b	b	b	b	b	a	a	h	a	a	a	b	h	a	a	a	a	a	b	b	b	b	b	b	b	a	b	a	b	a	b	b	b	b
B01	AX-176798361	AX-176798361_B01	118.183	Arahy.11	88106222		a	h	a	b	b	b	b	a	a	b	b	b	b	b	a	a	h	a	a	a	b	h	a	a	a	a	a	b	b	b	b	b	b	b	a	b	a	b	a	b	b	b	b
B01	AX-176812561	AX-176812561_B01	118.239	Arahy.11	70199288		a	h	a	b	b	b	b	a	a	b	b	b	b	b	a	a	h	a	a	a	b	h	a	a	a	a	a	b	b	b	b	b	b	b	a	b	a	b	a	b	b	b	b
B01	AX-176796076	AX-176796076_B01	118.347	Arahy.11	81340037		a	h	a	b	b	b	b	a	a	b	b	b	b	b	a	a	h	a	a	a	b	h	a	a	a	-	a	b	b	b	b	b	b	b	a	b	a	b	a	b	b	b	b
B01	AX-176795296	AX-176795296_B01	118.356	Arahy.11	79507109		a	-	a	b	b	b	b	a	a	b	b	b	b	b	a	a	h	a	a	a	b	h	a	a	a	a	a	b	b	b	b	b	b	b	a	b	-	b	a	b	b	b	b
B01	AX-147211461	AX-147211461_B01	118.565	Arahy.11	99062741		a	b	a	b	b	b	b	a	a	b	b	b	b	b	a	a	h	a	a	a	b	h	a	a	a	a	a	b	b	b	b	b	b	b	a	b	a	b	a	b	b	b	b
B01	AX-147238548	AX-147238548_B01	118.773	Arahy.11	64130250		a	-	a	b	b	b	b	a	a	b	b	b	b	b	a	a	h	a	a	a	b	h	a	a	a	a	a	b	b	b	b	b	b	b	a	b	a	b	a	b	b	b	b
B01	AX-176805726	AX-176805726_B01	118.782	Arahy.11	79104828		a	h	a	b	b	b	b	a	a	b	b	b	b	b	a	a	h	a	a	a	b	h	a	a	a	a	a	b	b	b	b	b	b	b	a	b	a	b	-	b	b	b	b
B01	AX-176821666	AX-176821666_B01	118.89	Arahy.11	88437929		a	h	a	b	b	b	b	a	a	b	b	b	b	b	a	a	h	a	a	a	b	h	a	a	a	a	a	b	b	b	-	b	b	b	a	b	a	b	a	b	b	b	b
B01	AX-176795577	AX-176795577_B01	119.108	Arahy.11	81333598		a	-	a	b	b	b	b	a	a	b	b	b	b	b	a	-	h	a	a	a	b	h	a	a	a	a	a	b	b	b	b	b	b	b	a	b	a	b	a	b	b	b	b
B01	AX-176809282	AX-176809282_B08	119.325	Arahy.11	60842646		a	h	a	b	b	b	b	a	a	b	b	b	b	b	a	a	h	a	a	a	b	h	a	a	a	a	a	b	b	b	b	b	b	b	a	b	a	b	a	b	b	b	b
B01	AX-176816214	AX-176816214_B01	119.434	Arahy.11	96697621		a	h	a	b	b	b	b	a	a	b	b	b	b	b	a	a	h	a	a	a	b	h	a	a	a	a	a	b	b	b	b	b	b	b	a	b	a	b	a	b	b	b	b
B01	AX-176793051	AX-176793051_B01	119.434	Arahy.11	93541141		a	h	a	b	b	b	b	a	a	b	b	b	b	b	a	a	h	a	a	a	b	h	a	a	a	a	a	b	b	b	b	b	b	b	a	b	a	b	a	b	b	b	b
B01	AX-176820885	AX-176820885_B01	119.48	Arahy.11	71541508		a	h	a	b	b	b	b	a	a	b	b	b	b	b	a	a	h	a	a	a	b	h	a	a	a	a	a	b	b	b	b	b	b	b	a	b	a	b	a	b	b	b	b
B01	AX-176816451	AX-176816451_B01	119.542	Arahy.11	85144017		a	h	a	b	b	b	b	a	a	b	b	b	b	b	a	-	h	a	a	a	b	h	a	a	a	a	a	b	b	b	b	b	b	b	a	b	a	b	a	b	b	b	b
B01	AX-176800342	AX-176800342_B01	119.65	Arahy.11	64867967		a	h	a	b	b	b	b	a	a	b	b	b	b	b	a	a	h	a	a	a	b	h	a	a	a	a	a	b	b	b	b	b	b	b	a	b	a	b	a	b	b	b	b
B01	AX-147238624	AX-147238624_B01	119.65	Arahy.11	104697160		a	h	a	b	b	b	b	a	a	-	b	b	b	b	a	a	h	a	a	a	b	h	a	a	a	a	a	b	b	b	b	b	b	b	a	b	a	b	a	b	b	b	b
B01	AX-176794294	AX-176794294_B01	121.468	Arahy.11	19287065		a	a	a	b	b	b	b	a	a	a	b	b	b	b	a	a	h	a	a	a	b	h	a	a	a	a	a	b	h	b	b	b	b	b	a	b	a	b	a	b	b	b	b
B01	AX-176811833	AX-176811833_B01	121.686	Arahy.11	19167720		a	a	a	b	b	b	b	a	a	a	b	b	b	b	a	a	h	a	a	a	b	h	a	a	a	a	a	b	h	b	b	b	b	b	a	b	a	b	a	b	b	b	b
B01	AX-176819866	AX-176819866_B01	123.032	Arahy.11	16374417		a	a	a	b	b	b	b	a	a	a	b	b	b	b	a	a	h	a	a	a	b	h	a	a	a	a	a	b	h	b	b	b	b	b	a	b	a	b	a	b	b	b	b
B01	AX-176792207	AX-176792207_B01	123.032	Arahy.11	16374487		a	a	a	b	b	b	b	a	a	a	b	b	b	b	a	a	h	a	a	a	b	h	a	a	a	a	a	b	h	b	b	b	b	b	a	b	a	b	a	b	b	b	b
B01	AX-176808113	AX-176808113_B01	125.831	Arahy.11	11201701		a	b	a	b	b	b	b	b	a	a	b	b	h	b	a	a	h	a	a	a	a	h	a	a	a	a	a	b	h	b	b	b	b	b	a	b	a	b	a	b	b	b	b
B01	AX-176819726	AX-176819726_B01	125.833	Arahy.11	11201631		a	b	a	b	b	b	b	b	a	a	b	b	h	b	a	a	h	a	a	a	a	h	a	a	a	a	a	b	h	b	b	b	b	b	a	b	a	b	a	b	b	b	b
B01	AX-176804784	AX-176804784_B01	126.328	Arahy.11	11172342		a	b	a	b	b	b	b	b	a	a	b	b	-	b	a	a	h	a	a	a	a	h	a	a	a	a	a	b	-	b	b	b	b	b	a	b	a	b	a	b	b	b	b
B01	AX-176817296	AX-176817296_B01	127.897	Arahy.11	10806870		a	b	a	b	b	b	b	b	a	a	b	b	h	b	a	a	h	-	a	-	h	h	a	a	a	a	h	-	a	b	b	b	b	b	a	b	h	b	a	b	b	b	b
B01	AX-147237935	AX-147237935_B01	128.518	Arahy.11	9961349		a	b	a	b	b	b	b	b	a	a	b	b	h	b	a	a	h	a	a	a	a	h	a	a	a	a	a	a	a	b	b	b	b	b	a	b	a	b	a	b	b	b	b
B01	AX-176803766	AX-176803766_B01	128.518	Arahy.11	10266698		a	b	a	b	b	b	b	b	a	a	b	b	h	b	a	a	h	a	a	a	a	h	a	a	a	a	a	a	a	b	b	b	b	b	a	b	a	b	a	b	b	b	b
B01	AX-176806232	AX-176806232_B01	128.518	Arahy.11	9940106		a	b	a	b	b	b	b	b	a	a	b	b	h	b	a	a	h	a	a	a	a	h	a	a	a	a	a	a	a	b	b	b	b	b	a	b	a	b	a	b	b	b	b
B01	AX-176819618	AX-176819618_B01	128.518	Arahy.11	10473571		a	b	a	b	b	b	b	b	a	a	b	b	h	b	a	a	h	a	a	a	a	h	a	a	a	a	a	a	a	b	b	b	b	b	a	b	a	b	a	b	b	b	b
B01	AX-176804180	AX-176804180_B01	128.518	Arahy.11	9864849		a	b	a	b	b	b	b	b	a	a	b	b	h	b	a	a	h	a	a	a	a	-	a	a	a	a	a	a	a	b	b	b	b	b	a	b	a	b	a	b	b	b	b
B01	AX-176805369	AX-176805369_B01	129.611	Arahy.11	9410306		a	b	a	b	b	b	b	b	a	a	b	b	-	b	a	a	a	a	a	a	a	-	a	a	a	a	a	a	a	b	b	b	b	b	a	b	a	b	a	b	b	b	b
B01	AX-176809216	AX-176809216_B01	130.071	Arahy.11	9424030		a	b	a	b	b	b	b	b	a	a	b	b	h	b	a	a	a	a	a	a	a	-	a	a	a	a	a	a	a	b	b	b	b	b	a	b	a	b	a	b	b	b	b
B01	AX-176807843	AX-176807843_B01	130.732	Arahy.11	8253338		a	b	a	b	b	b	b	b	a	a	b	b	h	b	a	a	a	a	a	a	a	h	a	a	a	a	a	a	a	b	b	b	b	b	a	b	a	b	a	b	b	b	b
B02	AX-176813255	AX-176813255_B02	0	Arahy.12	104709408		a	b	b	b	b	a	b	b	b	a	a	b	b	b	b	b	b	b	b	b	b	b	a	b	b	a	b	a	a	a	a	b	a	b	a	a	a	a	a	a	b	b	b
B02	AX-147214307	AX-147214307_B02	1.346	Arahy.12	101111044		a	b	b	b	b	a	b	b	b	a	a	h	b	b	b	h	b	b	b	b	h	b	a	b	b	a	h	a	a	a	a	b	a	b	a	a	a	a	a	a	b	b	b
B02	AX-147214309	AX-147214309_B02	1.638	Arahy.12	101111092		a	b	b	b	b	a	b	-	b	a	a	h	b	b	b	-	b	b	b	b	h	b	a	b	b	a	h	a	a	a	a	b	a	b	a	a	a	a	a	a	b	b	b
B02	AX-147214518	AX-147214518_B02	1.782	Arahy.12	104454103		a	b	b	b	b	a	b	h	b	a	a	h	b	b	b	h	b	b	b	b	h	b	a	b	b	a	h	a	a	a	a	b	a	b	a	a	a	a	a	a	b	b	b
B02	AX-176803835	AX-176803835_B02	2.321	Arahy.12	104733006		a	b	b	b	b	a	b	h	-	a	a	h	b	b	b	-	b	h	b	b	h	b	a	-	-	a	h	a	a	a	a	b	a	b	a	a	a	a	a	a	b	b	b
B02	AX-176813183	AX-176813183_B02	3.288	Arahy.12	103370388		a	b	b	b	b	a	b	h	b	a	a	h	b	b	b	h	b	b	b	b	-	b	a	b	h	a	h	a	a	a	a	b	a	b	a	a	a	a	a	a	b	b	b
B02	AX-176801448	AX-176801448_B02	4.912	Arahy.12	102340947		a	b	b	b	b	a	b	-	b	-	h	-	b	b	b	-	b	b	b	b	-	b	a	b	b	a	b	-	a	-	a	b	a	b	a	a	h	a	h	a	b	b	b
B02	AX-147214298	AX-147214298_B02	6.316	Arahy.12	101098070		a	b	b	b	b	a	b	h	b	a	h	a	b	b	b	h	-	b	b	b	h	b	a	b	b	a	h	a	a	a	a	b	a	b	a	a	a	a	a	a	b	b	b
B02	AX-176793347	AX-176793347_B02	6.866	Arahy.12	102994034		a	b	b	b	b	a	b	h	b	a	a	a	b	b	b	h	b	b	b	b	h	-	a	b	b	a	h	a	a	a	a	b	a	b	a	a	a	a	a	a	-	b	b
B02	AX-176799559	AX-176799559_B02	6.975	Arahy.12	103414440		a	b	b	b	b	a	b	h	b	a	a	a	b	b	b	h	b	b	b	b	h	b	a	b	b	a	h	a	a	a	a	b	a	b	a	a	a	a	a	a	b	b	b
B02	AX-176813619	AX-176813619_B02	7.142	Arahy.12	103046735		a	b	b	b	b	a	b	h	b	a	a	a	b	b	b	h	b	b	b	b	h	b	a	b	b	a	h	a	a	a	a	b	a	b	a	a	a	-	a	a	b	b	b
B02	AX-176819164	AX-176819164_B02	7.302	Arahy.12	102377797		a	b	b	b	b	a	b	h	b	a	a	a	b	b	b	h	b	b	b	b	h	b	a	b	b	a	h	a	a	a	a	b	a	b	a	a	a	a	a	a	b	b	b
B02	AX-147241902	AX-147241902_B02	7.41	Arahy.12	102266213		a	b	b	b	b	a	b	h	b	a	a	h	b	b	b	h	b	b	b	b	h	b	a	b	b	a	h	-	a	a	a	b	a	b	a	a	a	a	a	a	b	b	b
B02	AX-176822832	AX-176822832_B02	7.518	Arahy.12	104842253		a	b	b	b	b	a	b	h	b	a	a	h	b	b	b	-	b	b	b	b	h	b	a	b	b	a	h	a	a	a	a	b	a	b	a	a	a	a	a	a	b	b	b
B02	AX-176805459	AX-176805459_B02	7.627	Arahy.12	102443563		a	b	b	b	b	a	b	h	b	a	a	h	b	b	b	h	b	b	b	b	-	b	a	b	b	a	h	a	a	a	a	b	a	b	a	a	a	a	a	a	b	b	b
B02	AX-176805972	AX-176805972_B02	7.735	Arahy.12	102953748		a	b	b	b	b	a	b	h	b	a	a	h	b	b	b	h	b	b	b	b	h	b	a	b	b	a	h	a	a	a	a	b	a	b	a	a	a	a	a	a	b	b	b
B02	AX-176794948	AX-176794948_B02	8.064	Arahy.12	102376241		a	b	b	b	b	a	b	h	b	a	a	h	b	b	b	h	b	b	b	b	h	b	a	b	b	a	h	a	a	a	h	b	a	b	a	a	a	a	a	a	b	b	b
B02	AX-176809345	AX-176809345_B02	8.392	Arahy.12	105468498		a	b	b	b	b	a	b	h	b	a	a	h	b	b	b	-	b	b	b	b	h	b	a	b	b	a	h	a	a	a	h	b	a	b	a	a	a	a	a	a	b	b	b
B02	AX-176806948	AX-176806948_B02	8.61	Arahy.12	102326655		a	b	b	b	b	a	b	h	b	a	a	h	b	b	b	h	b	b	b	b	h	b	a	b	b	a	h	a	a	a	a	b	a	b	a	a	a	a	a	a	b	b	b
B02	AX-176818869	AX-176818869_B02	8.828	Arahy.12	101638018		a	b	b	b	b	a	b	h	b	a	a	h	b	b	b	h	b	b	b	b	h	b	a	b	b	a	h	a	a	a	a	b	a	b	a	a	a	a	a	a	b	b	b
B02	AX-176800559	AX-176800559_B02	9.155	Arahy.12	104898188		a	b	b	b	b	a	b	h	b	a	a	h	b	b	b	h	b	b	b	b	h	b	a	b	b	a	h	a	a	a	a	b	a	b	a	a	a	a	a	a	b	b	b
B02	AX-147214422	AX-147214422_B02	9.374	Arahy.12	103232128		a	b	b	b	b	a	b	h	b	a	a	h	b	b	b	h	b	b	b	b	h	b	a	b	b	a	h	a	a	a	a	b	a	b	a	a	a	a	a	a	b	b	b
B02	AX-176820385	AX-176820385_B02	12.846	Arahy.12	43873203		a	b	b	b	b	a	b	h	b	a	a	b	b	b	b	h	b	b	b	b	b	b	b	b	b	b	h	a	a	a	a	b	a	b	a	a	a	a	a	a	b	b	b
B02	AX-176821820	AX-176821820_B02	13.428	Arahy.12	60216772		a	b	b	b	b	a	b	h	b	a	a	h	b	b	b	h	b	b	b	b	b	b	b	b	b	b	h	a	a	a	a	b	a	h	a	a	a	a	a	a	-	b	b
B02	AX-176804012	AX-176804012_B02	15.078	Arahy.12	19295630		a	b	b	b	b	a	b	h	b	a	a	b	b	b	b	h	b	b	b	b	b	b	b	b	b	b	h	a	a	a	a	b	a	b	a	a	a	a	a	a	b	b	b
B02	AX-147213175	AX-147213175_B02	21.62	Arahy.12	9846878		a	-	b	b	a	b	b	a	b	a	b	b	b	b	b	b	b	b	b	b	b	b	h	b	b	b	h	a	a	h	h	b	a	b	a	a	a	a	a	b	b	b	b
B02	AX-147213174	AX-147213174_B02	21.731	Arahy.12	9846838		a	b	b	b	a	b	b	a	b	a	b	b	b	b	b	b	b	b	b	b	b	b	h	b	b	b	h	a	a	h	a	b	a	b	a	a	a	a	a	b	b	b	b
B02	AX-176816518	AX-176816518_B02	51.237	Arahy.12	3882949		a	b	b	a	a	b	a	a	a	a	h	a	h	a	b	b	b	a	a	a	b	a	a	a	b	b	a	a	a	h	a	a	a	b	b	b	a	a	a	b	b	a	b
B02	AX-147239780	AX-147239780_B02	77.161	Arahy.12	1276918		a	b	b	a	a	b	a	a	a	a	a	a	a	a	b	b	a	a	b	a	b	a	b	a	b	h	b	a	a	b	a	b	a	b	a	a	a	a	b	b	b	a	b
B03	AX-176807311	AX-176807311_B03	0	Arahy.13	2839591		a	b	a	b	h	a	b	a	a	a	b	b	a	b	b	a	a	a	b	b	a	h	a	b	a	b	h	h	b	b	b	b	a	b	b	b	a	b	b	b	b	b	b
B03	AX-176799785	AX-176799785_B03	1.467	Arahy.13	2918233		a	b	a	b	h	a	b	a	a	a	b	b	a	b	b	a	a	a	b	a	a	h	a	b	a	b	h	a	b	b	b	b	a	b	b	b	a	b	b	b	b	b	b
B03	AX-147243136	AX-147243136_B03	3.651	Arahy.13	3164157		a	b	a	b	h	a	b	a	a	a	b	b	a	a	b	a	a	a	b	a	a	h	a	b	a	b	a	a	b	b	b	b	a	b	a	b	a	b	h	b	b	b	b
B03	AX-176816776	AX-176816776_B03	4.653	Arahy.13	3220798		a	b	a	b	b	a	b	a	a	a	b	b	a	a	b	a	a	a	b	b	a	b	a	b	a	b	a	a	b	b	b	b	a	b	a	b	a	b	h	b	b	b	b
B03	AX-147243156	AX-147243156_B03	5.54	Arahy.13	3473709		a	b	a	b	b	a	b	a	a	a	b	b	a	a	b	a	a	a	b	b	a	b	a	b	a	b	a	a	b	b	b	b	a	b	a	b	a	b	h	b	b	b	b
B03	AX-176795907	AX-176795907_B03	6.427	Arahy.13	3643423		a	a	a	b	b	a	b	a	a	a	b	b	a	a	b	a	a	a	b	b	a	b	a	b	a	b	b	a	b	b	b	b	a	b	a	b	a	b	h	b	b	b	b
B03	AX-176793381	AX-176793381_B03	6.535	Arahy.13	4005632		a	a	a	b	b	a	b	a	a	a	b	b	a	a	b	a	a	a	b	b	a	b	a	b	a	b	b	a	b	b	b	b	a	b	a	b	a	b	h	b	b	b	b
B03	AX-176802219	AX-176802219_B03	6.644	Arahy.13	3973934		a	a	a	b	b	a	b	a	a	a	b	b	a	a	b	a	a	a	b	b	a	b	a	b	a	b	b	a	b	b	-	b	a	b	a	b	a	b	h	b	b	b	b
B03	AX-147243171	AX-147243171_B03	6.861	Arahy.13	3684365		a	a	a	b	b	a	b	a	a	a	b	b	a	a	b	a	a	a	b	b	a	b	a	b	a	b	b	a	b	b	b	b	a	b	a	b	a	b	h	b	b	b	b
B03	AX-176791826	AX-176791826_B03	7.189	Arahy.13	3859903		a	a	a	b	b	a	b	a	a	a	b	b	a	a	b	a	a	a	b	b	a	b	a	b	a	b	b	a	b	b	b	b	a	b	a	b	a	b	h	b	b	b	b
B03	AX-176792479	AX-176792479_B03	7.539	Arahy.13	4036284		a	a	a	b	b	a	b	a	a	a	b	b	a	a	b	a	-	-	b	b	h	b	a	b	a	b	b	a	b	b	b	b	a	b	a	b	a	b	-	b	b	b	b
B03	AX-147243198	AX-147243198_B03	8.516	Arahy.13	4114289		a	a	a	b	b	a	b	a	a	b	b	b	a	a	b	a	a	a	b	b	a	b	a	b	a	b	b	a	b	b	b	b	a	b	a	b	a	b	h	b	b	b	b
B03	AX-176797379	AX-176797379_B03	9.746	Arahy.13	4205248		a	a	a	b	b	a	b	a	a	b	b	b	a	a	b	a	a	a	b	b	a	b	a	b	a	b	b	a	b	b	b	b	a	b	a	b	a	b	h	b	b	b	b
B03	AX-176799674	AX-176799674_B03	10.184	Arahy.13	4285266		a	a	a	b	b	a	b	a	a	b	b	b	a	a	b	a	a	a	b	b	a	b	a	b	a	b	b	a	b	b	b	b	a	b	a	b	a	b	h	b	b	b	b
B03	AX-176819738	AX-176819738_B03	10.185	Arahy.13	4285196		a	a	a	b	b	a	b	a	a	b	b	b	a	a	b	a	a	a	b	b	a	b	a	b	a	b	b	a	b	b	b	b	a	b	a	b	a	b	h	b	b	b	b
B03	AX-176805176	AX-176805176_B03	10.511	Arahy.13	4352198		a	a	a	b	b	a	b	a	a	b	b	b	a	a	b	a	a	a	b	b	a	b	a	b	a	b	b	a	b	b	b	b	a	b	a	b	a	b	h	b	b	b	b
B03	AX-147243220	AX-147243220_B03	12.21	Arahy.13	4468757		a	a	a	b	b	a	b	a	a	b	b	b	a	a	b	a	a	a	b	b	a	b	a	b	a	b	b	a	b	b	b	b	a	b	a	b	a	a	h	b	b	b	b
B03	AX-176815362	AX-176815362_B03	12.647	Arahy.13	4534268		a	a	a	b	b	a	b	a	a	b	b	b	a	a	b	a	a	a	b	b	a	b	a	b	a	b	b	a	b	b	b	b	a	b	a	b	a	a	h	b	b	b	b
B03	AX-176800560	AX-176800560_B03	12.647	Arahy.13	4512523		a	a	a	b	b	a	b	a	a	b	b	b	a	a	b	a	a	a	b	b	a	b	a	b	a	b	b	a	b	b	b	b	a	b	a	b	a	a	h	b	b	b	b
B03	AX-176796644	AX-176796644_B03	13.42	Arahy.13	4674523		a	a	a	b	b	a	b	a	a	b	b	b	a	a	b	a	a	a	b	b	a	b	a	b	a	b	b	a	b	b	b	b	a	b	a	b	a	a	h	b	b	b	b
B03	AX-176806413	AX-176806413_B03	13.42	Arahy.13	4674238		a	a	a	b	b	a	b	a	a	b	b	b	a	a	b	a	a	a	b	b	a	b	a	b	a	b	b	a	b	b	b	b	a	b	a	b	a	a	h	b	b	b	b
B03	AX-176795623	AX-176795623_B03	14.193	Arahy.13	4750957		a	a	a	b	b	a	b	a	a	b	b	b	a	a	b	a	a	a	b	b	a	b	a	b	a	b	b	a	b	b	b	b	a	b	a	b	a	a	h	b	b	b	b
B03	AX-176803415	AX-176803415_B03	14.521	Arahy.13	5043082		a	a	a	b	b	a	b	a	a	b	b	b	a	a	b	a	a	a	b	b	a	b	a	b	a	b	b	a	b	b	b	b	a	b	a	b	a	a	h	b	b	b	b
B03	AX-176797614	AX-176797614_B03	14.581	Arahy.13	4827299		a	a	a	b	b	a	b	a	a	b	b	b	a	a	b	a	a	a	b	b	a	b	a	b	a	b	b	a	b	b	b	b	a	b	a	b	a	a	h	b	b	b	b
B03	AX-147243248	AX-147243248_B03	14.629	Arahy.13	4855244		a	a	a	b	b	a	b	a	a	b	b	b	a	a	b	a	a	a	b	b	a	b	a	b	a	b	b	a	b	b	b	b	a	b	a	b	a	a	h	b	b	b	b
B03	AX-176819925	AX-176819925_B03	15.402	Arahy.13	5219996		a	a	a	b	b	a	b	a	a	b	b	b	a	a	b	a	a	a	b	b	a	b	a	b	a	b	b	a	b	b	b	b	a	b	a	b	a	a	b	b	b	b	b
B03	AX-176816780	AX-176816780_B03	15.51	Arahy.13	5232776		a	a	a	b	b	a	b	a	a	b	b	-	a	a	b	a	a	a	b	b	a	b	a	b	a	b	b	a	b	b	b	b	a	b	a	b	a	a	b	b	b	b	b
B03	AX-176816781	AX-176816781_B03	15.518	Arahy.13	5244991		a	a	a	b	b	a	b	a	a	b	b	b	a	a	b	a	a	a	b	b	a	b	a	b	a	b	b	a	b	b	b	b	a	b	a	b	a	a	b	b	b	b	b
B03	AX-176797405	AX-176797405_B03	15.727	Arahy.13	5220066		a	a	a	b	b	a	b	a	a	b	b	b	a	a	b	a	a	a	b	b	a	b	a	b	a	b	b	a	b	b	b	b	a	b	a	b	a	a	b	b	b	b	b
B03	AX-176816783	AX-176816783_B03	16.165	Arahy.13	5279991		a	a	a	b	b	a	b	a	a	b	b	b	a	a	b	a	-	a	b	b	-	b	a	b	a	b	b	a	b	b	b	b	a	b	a	b	a	a	b	b	b	b	b
B03	AX-176815851	AX-176815851_B03	16.826	Arahy.13	5522646		a	a	h	b	b	a	b	a	a	b	b	b	a	a	b	a	a	a	b	b	a	b	a	b	a	b	b	a	b	b	b	b	a	b	a	b	a	a	b	b	b	b	b
B03	AX-176800212	AX-176800212_B03	17.829	Arahy.13	5645470		a	a	a	b	b	a	b	a	a	b	b	-	a	a	b	a	a	a	b	b	a	b	a	b	a	b	b	a	b	b	b	b	a	b	a	-	a	a	b	b	-	b	b
B03	AX-176801237	AX-176801237_B03	18.269	Arahy.13	5795673		a	a	a	b	b	a	b	a	a	b	b	b	a	a	b	a	a	a	b	b	a	b	a	b	a	b	b	a	b	b	b	b	a	b	a	b	a	a	b	b	b	b	b
B03	AX-176802995	AX-176802995_B03	19.155	Arahy.13	5973277		a	a	-	b	b	a	b	a	a	b	b	b	a	a	b	a	a	a	b	b	a	b	a	b	a	b	b	a	b	a	b	b	a	b	a	b	a	a	b	b	b	a	b
B03	AX-176801660	AX-176801660_B03	19.155	Arahy.13	5918167		a	a	a	b	b	a	b	a	a	b	b	b	a	a	b	a	a	a	b	b	a	b	a	b	a	b	b	a	b	a	b	b	a	b	a	b	a	a	b	b	b	a	b
B03	AX-176806212	AX-176806212_B03	20.041	Arahy.13	6084914		a	a	a	b	b	a	b	a	a	b	b	b	a	a	b	a	a	a	b	b	a	b	a	b	a	b	b	a	b	a	b	b	a	h	a	b	a	a	b	b	b	a	b
B03	AX-176803485	AX-176803485_B03	21.272	Arahy.13	6111801		a	a	b	b	b	a	b	a	a	b	b	b	a	a	b	-	a	a	b	b	a	b	a	b	a	b	b	a	b	a	b	b	a	h	a	b	a	a	b	b	b	a	b
B03	AX-176803021	AX-176803021_B03	21.824	Arahy.13	6154707		a	a	b	b	b	a	b	a	a	b	b	b	a	a	b	a	a	a	b	b	a	h	a	b	a	b	b	a	b	a	b	b	a	h	a	b	a	a	b	b	b	a	b
B04	AX-176794734	AX-176794734_B04	0	Arahy.14	129888779		a	b	b	b	a	b	a	a	a	b	b	b	a	a	b	b	b	b	b	b	b	b	a	b	a	b	a	b	b	b	b	a	b	b	a	b	b	a	a	b	b	b	b
B04	AX-176813019	AX-176813019_B04	1.261	Arahy.14	128956816		a	b	b	b	a	b	a	a	a	b	b	b	a	a	b	b	b	b	b	b	b	b	a	b	a	b	a	b	b	b	b	a	b	b	a	b	b	a	a	b	b	b	b
B04	AX-176797720	AX-176797720_B04	1.671	Arahy.14	128172522		a	b	b	b	a	b	a	a	a	b	b	b	a	a	b	b	b	b	b	b	b	b	a	b	a	b	a	b	b	b	b	a	b	b	a	b	b	a	a	b	b	b	b
B04	AX-176817286	AX-176817286_B04	1.807	Arahy.14	128019040		a	b	b	b	a	b	a	a	a	b	b	-	a	a	b	b	b	-	b	b	b	b	a	b	a	b	a	b	b	b	b	a	b	b	a	b	b	a	a	b	b	b	b
B04	AX-176820573	AX-176820573_B04	2.053	Arahy.14	128395923		a	b	b	b	a	b	a	a	a	b	b	b	a	a	b	b	b	b	b	b	b	b	a	b	a	b	a	b	b	b	b	a	b	b	a	b	b	a	a	b	b	b	b
B04	AX-176815973	AX-176815973_B04	2.685	Arahy.14	127652762		a	b	b	b	a	b	a	a	a	b	b	b	a	a	b	b	b	b	b	b	b	b	a	b	a	b	a	b	b	b	b	a	b	b	a	b	b	a	a	b	b	b	b
B04	AX-176800740	AX-176800740_B04	3.571	Arahy.14	127388920		a	b	b	b	a	b	a	a	a	b	-	b	a	a	b	b	b	b	b	b	b	b	b	b	a	a	a	b	b	b	b	a	b	b	a	b	b	a	a	b	b	b	b
B04	AX-176802620	AX-176802620_B04	3.68	Arahy.14	127381965		a	b	b	b	a	b	a	a	a	b	b	b	a	a	b	b	b	b	b	b	b	b	b	b	a	a	a	b	b	b	b	a	b	b	a	b	b	a	a	b	b	b	b
B04	AX-176805663	AX-176805663_B04	4.453	Arahy.14	127229023		a	b	b	b	a	b	a	a	a	b	b	b	a	a	b	b	b	b	b	b	b	b	b	b	a	a	a	b	b	b	b	h	b	b	a	b	b	a	a	b	b	b	b
B04	AX-176807254	AX-176807254_B04	5.226	Arahy.14	126321738		a	b	b	b	a	b	b	a	a	b	b	b	a	a	b	b	b	b	b	b	b	b	b	b	-	-	a	a	b	b	a	h	b	b	a	b	b	a	a	b	b	b	b
B04	AX-147248240	AX-147248240_B04	5.461	Arahy.14	126683509		a	b	b	b	a	b	b	a	a	b	b	b	a	a	b	b	b	b	b	b	b	b	b	b	a	a	a	a	b	b	a	h	b	b	a	b	b	a	a	b	b	b	b
B04	AX-176805823	AX-176805823_B04	6.558	Arahy.14	125930167		a	b	b	b	a	b	b	a	a	b	b	b	a	a	b	b	h	b	b	b	b	b	b	b	a	a	a	a	b	b	a	h	b	b	a	b	b	a	a	b	b	b	b
B04	AX-147248192	AX-147248192_B04	7.672	Arahy.14	125745218		a	b	b	b	a	b	b	a	a	b	b	b	a	a	b	b	-	b	b	b	b	b	b	b	a	a	a	a	b	h	a	h	b	b	a	b	b	a	a	b	b	b	b
B04	AX-176813339	AX-176813339_B04	9.018	Arahy.14	124779224		a	b	b	b	a	b	b	a	a	b	b	b	a	a	b	a	h	b	b	b	b	b	b	b	a	a	a	a	b	a	a	h	b	b	a	b	b	a	a	b	b	b	b
B04	AX-176800069	AX-176800069_B04	10.578	Arahy.14	123136803		a	b	b	b	a	b	b	a	a	b	b	b	a	a	b	a	h	b	b	b	b	b	a	b	a	a	a	a	b	a	h	h	b	b	a	b	b	a	-	b	b	b	b
B04	AX-176793483	AX-176793483_B04	10.821	Arahy.14	122431393		a	b	b	b	a	b	b	a	a	b	b	b	a	a	b	a	h	b	b	b	b	b	a	b	a	a	a	a	b	a	a	h	b	b	a	b	b	a	a	b	b	b	b
B04	AX-147248085	AX-147248085_B04	11.039	Arahy.14	121962290		a	b	b	b	a	b	b	a	a	b	b	b	a	a	b	a	h	b	b	b	b	b	a	b	a	a	a	a	b	b	a	h	b	b	a	b	b	a	a	b	b	b	b
B04	AX-176811424	AX-176811424_B04	11.925	Arahy.14	121553553		a	-	b	b	a	b	b	a	a	b	b	h	a	a	b	a	h	b	b	b	b	b	a	b	a	a	a	a	b	b	a	h	b	b	a	b	b	a	a	b	b	b	b
B04	AX-176809622	AX-176809622_B04	12.474	Arahy.14	121554144		a	b	b	b	a	b	b	a	a	b	b	b	a	a	b	a	h	b	b	b	b	b	a	b	a	a	a	a	b	-	a	h	b	b	a	b	b	a	a	b	b	b	b
B04	AX-176809313	AX-176809313_B04	12.692	Arahy.14	121391890		a	b	b	b	a	b	b	a	a	b	b	b	a	a	b	a	h	b	b	b	b	b	a	b	a	a	a	a	b	b	a	h	b	b	a	b	b	a	a	b	b	b	b
B04	AX-147247867	AX-147247867_B04	18.663	Arahy.14	108236093		a	b	a	b	a	b	b	a	a	b	b	b	b	a	b	a	a	b	b	b	b	b	a	a	a	b	a	a	b	b	a	h	b	b	a	a	b	a	a	b	b	b	b
B04	AX-176817176	AX-176817176_B04	20.013	Arahy.14	92495227		a	b	a	b	a	b	b	a	a	b	b	b	b	a	b	a	a	b	b	b	b	b	a	a	a	b	a	a	b	b	a	a	b	b	a	a	b	a	a	b	b	b	b
B04	AX-176802690	AX-176802690_B04	20.674	Arahy.14	38853489		a	b	a	b	a	b	b	a	a	b	b	-	-	a	b	a	a	b	b	b	b	b	a	a	a	b	a	a	b	b	a	a	b	b	a	a	b	a	a	b	b	b	b
B04	AX-176792738	AX-176792738_B04	20.782	Arahy.14	46434022		a	b	a	b	a	b	b	a	a	b	b	b	b	a	b	a	a	b	b	b	b	b	a	a	a	b	a	a	b	b	a	a	b	b	a	a	b	a	a	b	b	b	b
B04	AX-176794312	AX-176794312_B04	22.012	Arahy.14	21969511		a	b	a	b	a	b	b	a	a	b	b	b	b	a	b	a	a	b	b	b	b	b	a	a	a	b	a	a	b	b	a	a	b	b	a	a	b	b	a	b	b	b	b
B04	AX-176794821	AX-176794821_B04	23.83	Arahy.14	14463919		a	b	a	b	a	b	b	a	a	b	b	b	b	a	b	a	a	b	b	b	b	b	a	a	a	b	a	a	b	b	a	a	b	b	b	a	b	b	a	b	b	b	b
B04	AX-176823874	AX-176823874_B04	29.052	Arahy.14	8435116		a	a	a	b	a	a	b	a	b	b	b	b	b	a	b	a	a	b	b	b	b	b	b	b	a	b	b	a	b	a	a	a	b	b	h	a	b	b	a	b	b	b	b
B04	AX-176824239	AX-176824239_B04	29.16	Arahy.14	8330067		a	a	a	b	a	a	b	a	b	b	b	b	b	a	b	a	h	b	b	b	b	b	b	b	a	b	b	a	b	a	a	a	b	b	h	a	b	b	a	b	b	b	b
B04	AX-176798373	AX-176798373_B04	29.16	Arahy.14	8330137		a	a	a	b	a	a	b	a	b	b	b	b	b	a	b	a	h	b	b	b	b	b	b	b	a	b	b	a	b	a	a	a	b	b	h	a	b	b	a	b	b	b	b
B04	AX-176803621	AX-176803621_B04	30.623	Arahy.14	8141262		a	a	a	b	a	a	b	a	b	b	b	b	b	a	b	a	h	b	b	b	b	-	b	b	a	b	b	a	b	a	a	a	b	b	h	a	b	b	a	b	b	b	b
B04	AX-176801468	AX-176801468_B04	31.979	Arahy.14	8034316		a	a	a	b	a	a	-	a	b	b	b	b	-	a	b	a	h	b	b	-	b	b	h	b	a	b	-	a	b	a	a	a	b	b	h	a	b	b	a	b	-	b	-
B04	AX-176799268	AX-176799268_B04	34.048	Arahy.14	7927402		a	a	a	b	a	a	b	a	b	b	b	b	b	a	b	a	a	b	b	b	b	b	b	b	a	b	b	a	b	a	a	a	b	b	h	a	b	b	a	b	b	b	b
B04	AX-176823148	AX-176823148_B04	34.16	Arahy.14	7882105		a	a	a	b	a	a	b	a	b	b	b	b	b	-	b	-	a	b	b	b	b	b	b	b	a	b	b	a	b	a	a	a	b	b	h	a	b	b	a	b	b	b	b
B04	AX-176802465	AX-176802465_B04	42.286	Arahy.14	5700301		a	b	a	b	a	a	b	a	b	b	b	b	b	a	b	a	a	b	a	b	b	b	b	b	a	b	b	a	b	b	a	a	b	b	h	a	a	b	a	b	b	b	b
B04	AX-176804761	AX-176804761_B04	42.617	Arahy.14	5589061		a	b	a	b	a	a	b	a	b	b	b	b	b	a	b	a	a	b	a	b	b	b	b	b	a	b	b	a	b	b	a	a	b	b	h	a	a	b	a	b	b	b	b
B04	AX-176819689	AX-176819689_B04	42.617	Arahy.14	5588991		a	b	a	b	a	a	b	a	b	b	b	b	b	a	b	a	a	b	a	b	b	b	b	b	a	b	b	a	b	b	a	a	b	b	h	a	a	b	a	b	b	b	b
B05_1	AX-147250105	AX-147250105_B05	0	Arahy.15	121049918		a	b	b	a	a	a	a	a	b	b	b	a	b	b	a	b	b	a	a	a	a	a	b	b	a	a	a	a	a	a	a	b	a	b	b	b	b	b	b	a	b	h	b
B05_1	AX-176817433	AX-176817433_B05	3.09	Arahy.15	28600979		a	b	b	a	a	a	a	a	b	b	b	a	b	b	a	b	b	a	a	a	b	a	b	b	a	a	a	h	a	a	b	b	a	b	b	b	b	b	b	a	b	h	b
B05_1	AX-176816125	AX-176816125_B05	3.307	Arahy.15	28194959		a	b	b	a	a	a	a	a	b	b	b	a	b	b	a	b	b	a	a	a	b	a	b	b	a	a	a	h	a	a	b	b	a	b	b	b	b	b	b	a	b	h	b
B05_1	AX-176817431	AX-176817431_B05	3.307	Arahy.15	28319411		a	b	-	a	a	a	a	a	b	b	b	a	b	b	a	b	b	a	a	a	b	a	b	b	a	a	a	h	a	a	b	b	a	b	b	b	b	b	b	a	b	h	b
B05_1	AX-147249733	AX-147249733_B05	3.437	Arahy.15	28118113		a	b	b	a	a	a	a	a	b	b	b	a	b	b	a	b	b	a	a	a	b	a	b	b	a	a	a	h	a	a	-	-	a	b	b	b	b	b	b	a	b	h	b
B05_1	AX-176819710	AX-176819710_B05	5.246	Arahy.15	27813921		a	b	b	a	a	a	a	a	b	b	b	a	b	b	a	b	b	a	a	a	b	a	b	b	a	a	a	h	a	a	-	b	a	b	b	b	b	b	b	a	b	h	b
B05_1	AX-176802485	AX-176802485_B05	7.231	Arahy.15	27956200		a	b	h	a	a	a	a	a	-	-	h	a	b	b	a	b	b	a	a	a	b	a	b	b	a	a	a	h	a	a	-	b	a	b	b	-	b	b	b	a	b	h	b
B05_1	AX-176814861	AX-176814861_B05	8.864	Arahy.15	27736821		a	b	b	a	a	a	a	a	b	b	b	a	b	b	a	b	b	a	a	a	b	a	b	b	a	a	a	h	a	a	b	b	a	b	b	b	b	b	b	a	b	h	b
B05_1	AX-147224897	AX-147224897_B05	13.398	Arahy.15	20356721		b	a	b	a	a	a	a	b	b	b	b	a	b	b	a	b	b	a	a	a	b	a	b	b	a	a	a	b	a	a	b	b	a	h	b	b	b	b	b	a	b	h	b
B05_1	AX-147249517	AX-147249517_B05	13.946	Arahy.15	19905391		b	a	b	a	b	a	a	b	b	b	b	a	b	b	a	b	b	a	a	a	b	a	b	b	a	a	a	b	a	a	b	b	a	h	b	b	b	b	b	a	b	h	b
B05_1	AX-176807103	AX-176807103_B05	17.393	Arahy.15	17316171		b	a	b	b	b	a	a	b	b	b	b	a	b	b	a	b	b	a	a	a	b	a	b	b	a	a	a	b	a	a	b	b	a	h	b	b	b	b	b	a	b	h	b
B05_1	AX-176818975	AX-176818975_B05	18.279	Arahy.15	16070403		b	a	b	b	b	a	a	b	b	b	b	a	b	b	a	b	b	a	a	a	b	a	b	b	a	a	a	b	a	a	b	b	a	h	b	a	b	b	b	a	b	h	b
B05_1	AX-176805998	AX-176805998_B05	23.352	Arahy.15	12463729		b	a	b	b	b	a	b	b	b	a	b	a	b	b	a	b	b	a	a	a	a	a	b	b	a	a	a	b	a	a	b	b	a	b	b	a	b	b	b	a	b	a	b
B05_1	AX-176793359	AX-176793359_B05	23.679	Arahy.15	12365121		b	a	b	b	b	a	b	b	b	a	b	a	b	b	a	b	b	a	a	a	a	a	b	b	a	a	a	b	a	a	b	b	a	b	b	a	b	b	b	a	b	a	b
B05_1	AX-176817345	AX-176817345_B05	28.226	Arahy.15	9040955		b	a	b	b	b	a	b	b	b	a	b	b	b	b	a	b	b	a	a	a	a	a	b	b	a	a	b	b	a	a	b	a	a	a	b	a	b	b	b	a	a	b	a
B05_2	AX-147251374	AX-147251374_B05	0	Arahy.15	159645424		b	a	b	a	a	a	a	a	a	b	b	a	a	b	b	b	a	b	a	b	b	b	a	b	a	a	a	b	b	b	b	b	a	a	a	a	b	a	b	b	a	b	b
B05_2	AX-147223971	AX-147223971_A05	0.217	Arahy.15	114997205		b	a	b	a	a	a	a	a	a	b	b	a	a	b	b	b	a	b	a	b	b	b	a	b	a	a	a	b	b	b	b	b	a	a	a	a	b	a	b	b	a	b	b
B05_2	AX-177639913	AX-177639913_B05	0.878	Arahy.15	159650764		b	a	b	a	a	a	a	a	a	b	b	a	a	b	b	b	a	b	a	b	b	b	a	b	a	a	a	b	b	b	b	b	a	a	a	a	b	a	b	b	a	b	b
B05_2	AX-147223969	AX-147223969_A05	1.651	Arahy.15	114993245		b	a	b	a	h	a	a	h	-	b	b	a	a	b	b	b	a	b	a	b	b	b	a	b	a	a	a	b	b	b	b	b	a	a	-	a	b	a	b	b	-	b	b
B05_2	AX-176802394	AX-176802394_B05	4.855	Arahy.15	159381472		b	a	b	a	h	a	a	h	a	b	b	-	a	a	b	b	a	b	a	b	b	b	a	b	a	a	a	b	b	b	b	b	a	a	a	a	b	a	b	b	a	b	b
B05_2	AX-176822034	AX-176822034_B05	7.419	Arahy.15	159144518		b	a	b	a	a	a	a	h	a	b	b	a	a	a	a	b	a	b	b	b	b	b	a	b	a	a	a	b	b	b	b	b	a	a	b	a	b	a	b	b	a	b	b
B05_2	AX-176792848	AX-176792848_B05	8.818	Arahy.15	158986972		b	a	b	a	a	a	a	h	a	b	b	a	a	a	a	b	a	b	b	b	b	b	b	b	a	a	a	b	b	b	b	b	a	a	b	a	b	a	b	b	a	b	b
B05_2	AX-176821336	AX-176821336_B05	10.953	Arahy.15	158902021		b	a	b	a	a	a	a	h	a	b	b	a	a	b	a	b	b	b	b	b	b	b	b	b	a	a	a	b	b	b	b	b	a	a	b	a	b	a	b	b	a	b	b
B05_2	AX-147223887	AX-147223887_B05	12.032	Arahy.15	158401805		a	a	b	a	a	a	a	h	a	b	b	a	a	b	a	b	b	b	b	b	b	b	b	b	a	a	a	b	b	b	b	b	a	a	b	a	b	a	b	b	a	b	b
B05_2	AX-176817512	AX-176817512_B05	12.504	Arahy.15	158720115		a	a	b	a	a	a	a	h	-	b	b	a	a	b	a	b	b	b	b	b	b	b	b	b	a	a	a	b	b	b	b	b	a	a	b	a	b	a	b	b	a	b	b
B05_2	AX-176823699	AX-176823699_B05	12.722	Arahy.15	158392245		a	a	b	a	a	a	a	h	a	b	b	a	a	b	a	b	b	b	b	b	b	b	b	b	a	a	a	b	b	b	b	b	a	a	b	a	b	a	b	b	a	b	b
B05_2	AX-147251268	AX-147251268_B05	13.16	Arahy.15	158372489		a	a	b	a	a	a	a	h	a	b	b	a	a	b	a	b	b	b	b	b	b	b	b	b	a	a	a	b	b	b	b	b	a	a	b	a	b	a	b	b	a	b	b
B05_2	AX-147251245	AX-147251245_B05	15.102	Arahy.15	158214154		a	a	b	a	a	a	a	h	a	a	b	a	a	b	a	b	b	b	b	b	b	b	b	b	a	h	a	b	b	b	b	b	a	b	b	b	b	a	b	b	a	b	b
B05_2	AX-147223816	AX-147223816_B05	19.071	Arahy.15	157601438		a	a	b	a	a	a	a	b	b	h	b	a	a	b	a	b	b	b	b	b	b	b	b	h	a	b	a	b	a	b	a	b	a	b	b	b	b	a	b	b	a	b	b
B05_2	AX-147223814	AX-147223814_A05	19.288	Arahy.15	112470317		a	a	b	a	a	a	a	b	b	h	b	a	a	b	a	b	b	b	b	b	b	b	b	h	a	b	a	b	a	b	a	b	a	b	b	b	b	a	b	b	a	b	b
B05_2	AX-147251194	AX-147251194_B05	21.603	Arahy.15	157156234		a	a	b	a	a	a	b	b	b	b	b	a	b	b	a	b	b	b	b	b	b	b	b	h	a	b	a	b	a	b	b	b	a	b	b	b	b	a	b	b	a	b	b
B05_2	AX-147251167	AX-147251167_B05	25.219	Arahy.15	156546782		a	b	b	a	a	a	b	b	b	b	b	a	b	b	a	b	a	b	b	h	b	b	b	a	a	b	a	b	a	b	b	b	a	b	b	b	b	a	b	b	a	h	b
B06	AX-176800210	AX-176800210_B06	0	Arahy.16	1890336		h	a	a	h	b	b	a	b	b	a	a	a	a	a	b	a	b	a	h	b	h	b	a	h	b	a	b	b	b	b	a	b	b	a	a	b	b	a	h	b	b	a	b
B06	AX-176820832	AX-176820832_B06	1.73	Arahy.16	1980248		h	a	a	h	b	b	a	b	b	a	a	a	a	a	b	a	b	a	h	b	a	b	a	h	b	a	b	-	b	b	a	b	b	a	a	b	b	b	a	b	b	a	b
B06	AX-147225018	AX-147225018_B06	4.508	Arahy.16	2024608		b	a	a	b	b	b	a	b	b	a	a	a	a	a	b	a	b	a	b	b	a	b	a	b	b	a	b	a	b	b	a	b	b	a	a	b	b	b	a	b	b	a	b
B06	AX-176817814	AX-176817814_B06	6.244	Arahy.16	2029732		h	a	a	h	b	-	a	b	b	a	a	a	a	a	-	a	b	a	h	-	a	h	a	h	b	a	b	a	b	b	a	b	b	a	a	b	b	b	a	-	b	a	h
B06	AX-176821122	AX-176821122_B06	7.343	Arahy.16	2030164		h	a	a	-	b	b	a	b	b	a	a	a	a	a	b	a	b	a	b	b	a	b	a	h	b	a	b	a	b	b	a	b	b	a	a	b	b	b	a	b	b	a	b
B06	AX-176798902	AX-176798902_B06	7.452	Arahy.16	2028348		-	a	a	h	b	b	a	b	b	a	a	a	a	a	b	a	b	a	b	b	a	b	a	h	b	a	b	a	b	b	a	b	b	a	a	b	b	b	a	b	b	a	b
B06	AX-176799328	AX-176799328_B06	8.915	Arahy.16	2108671		h	a	a	h	b	b	a	b	b	a	a	a	a	a	b	a	b	a	h	b	a	b	a	h	a	a	b	a	b	b	a	b	b	a	a	b	b	b	a	b	b	b	b
B06	AX-147251673	AX-147251673_B06	8.915	Arahy.16	2108601		h	a	a	h	b	b	a	b	b	a	a	a	a	a	b	a	b	a	h	b	a	b	a	h	a	a	b	a	b	b	a	b	b	a	a	b	b	b	a	b	b	b	b
B06	AX-176798478	AX-176798478_B06	10.029	Arahy.16	2393180		h	a	a	h	b	b	a	b	b	a	a	a	a	a	b	a	b	a	b	b	a	b	a	h	a	a	b	a	b	b	a	b	b	a	a	b	b	b	a	b	b	b	b
B06	AX-176809834	AX-176809834_B06	11.728	Arahy.16	2506344		h	a	a	h	b	b	a	b	b	a	a	a	a	a	b	a	b	a	b	b	a	b	a	h	a	a	b	a	b	b	a	b	b	a	a	b	b	b	a	b	b	b	b
B06	AX-147251749	AX-147251749_B06	12.176	Arahy.16	3787181		b	a	a	h	b	b	a	b	b	a	a	a	a	a	b	a	b	a	b	b	a	b	a	h	a	a	b	a	b	b	a	b	b	a	a	b	b	b	a	b	b	b	b
B06	AX-147224906	AX-147224906_B06	18.108	Arahy.16	7132929		a	a	a	a	b	b	a	b	b	a	a	a	a	a	b	a	b	a	b	b	a	b	a	a	a	b	b	a	b	b	a	a	b	a	b	b	b	b	a	b	b	b	b
B06	AX-176798858	AX-176798858_B06	18.337	Arahy.16	7184162		a	a	a	a	b	b	a	b	b	a	a	a	a	a	b	a	b	a	b	b	a	b	a	a	a	b	b	a	b	b	a	a	b	a	b	b	b	b	a	b	b	b	b
B06	AX-176807233	AX-176807233_B06	18.905	Arahy.16	7355193		a	a	a	a	b	b	a	b	b	a	a	a	a	a	b	a	b	a	b	b	a	b	a	a	a	b	b	a	b	b	a	a	b	a	b	b	b	b	a	b	b	b	b
B06	AX-176823538	AX-176823538_B06	22.607	Arahy.16	7618191		a	a	a	a	a	b	a	-	b	a	a	a	a	a	b	a	b	a	b	b	a	b	a	a	a	b	b	b	b	b	h	a	b	-	b	a	b	b	a	b	-	b	b
B06	AX-147251864	AX-147251864_B06	22.956	Arahy.16	7788687		a	a	a	a	a	b	a	b	b	a	a	a	a	a	b	a	b	a	b	b	a	b	a	a	a	b	b	b	b	b	h	a	b	a	b	a	b	b	a	b	h	b	b
B06	AX-147251899	AX-147251899_B06	26.753	Arahy.16	8246202		a	a	a	a	a	b	a	b	b	a	a	a	a	a	b	a	b	a	b	b	a	b	a	a	a	b	b	b	b	b	h	h	b	a	b	a	b	a	a	b	h	b	b
B06	AX-176804170	AX-176804170_B06	27.644	Arahy.16	8771463		a	a	a	a	a	b	a	b	b	a	a	a	a	a	b	a	b	a	b	b	a	b	a	a	a	b	b	b	a	b	h	h	b	a	b	a	b	a	a	b	h	b	b
B06	AX-176803526	AX-176803526_B06	27.972	Arahy.16	9019688		a	a	a	a	a	b	a	b	b	a	a	a	a	a	b	a	b	a	b	b	a	b	a	h	a	b	b	b	a	b	a	-	b	a	b	a	b	a	a	b	-	b	b
B06	AX-176822258	AX-176822258_B06	28.3	Arahy.16	9069415		a	a	a	a	a	b	a	b	b	a	a	a	a	a	b	h	b	a	b	b	a	b	a	h	a	b	b	b	a	b	h	h	b	a	b	a	b	a	a	b	h	b	b
B06	AX-176819980	AX-176819980_B06	29.883	Arahy.16	9281783		a	a	a	a	a	b	a	b	b	a	a	a	a	a	b	h	b	h	b	b	a	b	a	h	a	b	b	b	a	b	h	a	b	a	b	a	b	a	a	b	a	b	b
B06	AX-176796595	AX-176796595_B06	29.94	Arahy.16	9281713		a	a	a	a	a	b	a	b	b	a	a	a	a	a	b	h	b	h	b	b	a	b	a	h	a	b	b	b	a	b	h	a	b	a	b	a	b	a	a	b	a	b	b
B06	AX-176815675	AX-176815675_B06	29.992	Arahy.16	9275536		a	a	a	a	a	b	a	b	b	a	a	a	a	a	b	h	b	h	b	b	a	b	a	h	a	b	b	b	a	b	h	a	b	a	b	a	b	a	a	b	a	b	b
B06	AX-176813154	AX-176813154_B06	30.429	Arahy.16	9352349		a	a	a	a	a	b	a	b	b	a	a	a	a	a	b	h	b	h	b	b	a	b	a	h	a	b	b	b	a	b	h	a	b	a	b	a	b	a	a	b	a	b	b
B06	AX-176806482	AX-176806482_B06	30.867	Arahy.16	9423100		a	a	a	a	a	b	a	b	b	a	a	a	a	a	b	h	b	h	b	b	a	b	a	h	a	b	b	b	a	b	h	a	b	a	b	a	b	a	a	b	a	b	b
B06	AX-176816167	AX-176816167_B06	30.913	Arahy.16	9423170		a	a	a	a	a	b	a	b	b	a	a	a	a	a	b	h	b	h	b	b	a	b	a	h	a	b	b	b	a	b	h	a	b	a	b	a	b	a	a	b	a	b	b
B06	AX-176797332	AX-176797332_B06	30.975	Arahy.16	9460283		a	a	a	a	a	b	a	b	b	a	a	a	a	a	b	h	b	h	b	b	a	b	a	h	a	b	b	b	a	b	h	a	b	a	b	a	b	a	a	b	a	b	b
B06	AX-176813604	AX-176813604_B06	31.302	Arahy.16	9840782		a	a	a	a	a	b	a	b	b	a	a	a	a	a	b	h	b	h	b	b	a	b	a	a	a	b	b	b	a	b	h	a	b	a	b	a	b	a	a	b	a	b	b
B06	AX-176798501	AX-176798501_B06	31.302	Arahy.16	10547014		a	a	a	a	a	b	a	b	b	a	a	a	a	a	b	h	b	h	b	b	a	b	a	a	a	b	b	b	a	b	-	a	b	a	b	a	b	a	a	b	a	b	b
B06	AX-176804648	AX-176804648_B06	31.375	Arahy.16	9842036		a	a	a	a	a	b	a	b	b	a	a	a	a	a	b	h	b	h	b	b	a	b	a	a	a	b	b	b	a	b	h	a	b	a	b	a	b	a	a	b	a	b	b
B06	AX-176800929	AX-176800929_B06	31.412	Arahy.16	10232332		a	a	a	a	a	b	a	b	b	a	a	a	a	a	b	h	b	h	b	b	a	b	a	a	a	b	b	b	a	b	h	a	b	a	b	a	b	a	a	b	a	b	b
B06	AX-147251993	AX-147251993_B06	31.52	Arahy.16	9613403		a	a	a	a	a	b	a	b	b	a	a	a	a	a	b	h	b	h	b	b	a	b	a	a	a	b	b	b	a	b	h	a	b	a	b	a	b	a	a	b	a	b	b
B06	AX-176805259	AX-176805259_B06	31.737	Arahy.16	9947633		a	a	a	a	a	b	a	b	b	a	a	a	a	a	b	h	b	b	b	b	a	b	a	a	a	b	b	b	a	b	h	a	b	a	b	a	b	a	a	b	a	b	b
B06	AX-176799662	AX-176799662_B06	32.065	Arahy.16	9750136		a	a	a	a	a	b	a	b	b	a	a	a	a	a	b	h	b	-	b	b	a	b	a	a	a	b	b	b	a	b	-	a	-	a	b	a	b	a	a	b	a	b	b
B06	AX-176819771	AX-176819771_B06	32.328	Arahy.16	10546944		a	-	a	a	a	b	a	b	b	a	a	a	a	a	b	h	b	h	b	b	a	b	a	a	a	b	b	b	a	b	h	a	b	a	b	a	b	a	a	b	a	b	b
B06	AX-176819708	AX-176819708_B06	32.505	Arahy.16	9908195		a	a	a	a	a	b	a	b	b	a	a	a	a	a	b	h	b	h	b	b	a	b	a	a	a	b	-	b	a	b	h	a	b	a	-	a	b	a	a	b	a	b	b
B06	AX-176797251	AX-176797251_B06	32.505	Arahy.16	9908265		a	a	a	a	a	b	a	b	b	a	a	a	a	a	b	h	b	h	b	b	a	b	a	a	a	b	b	b	a	b	h	a	b	a	b	a	b	a	a	b	a	b	b
B06	AX-176816083	AX-176816083_B06	32.754	Arahy.16	10805848		a	a	a	a	a	b	a	b	b	a	a	a	h	a	b	h	b	h	b	b	a	b	a	a	a	b	b	b	a	b	h	a	b	a	b	a	b	a	a	b	a	b	b
B06	AX-147252043	AX-147252043_B06	33.382	Arahy.16	11356867		a	a	b	a	a	b	a	b	b	a	a	a	h	a	b	h	b	h	b	b	a	b	a	a	b	b	b	b	a	b	h	a	b	a	b	a	b	a	a	b	a	b	b
B06	AX-176814412	AX-176814412_B06	34.158	Arahy.16	11041580		a	a	a	a	a	b	a	b	b	a	a	a	-	a	b	-	b	h	h	b	a	b	a	a	b	b	b	b	a	b	-	a	b	a	b	a	b	a	a	b	a	b	b
B06	AX-176822348	AX-176822348_B06	35.525	Arahy.16	11948680		a	a	b	a	a	b	a	b	b	a	a	a	-	a	b	h	b	h	-	b	a	-	a	a	b	b	-	b	a	b	-	a	b	a	b	a	b	a	a	b	a	-	b
B06	AX-176819712	AX-176819712_B06	36.185	Arahy.16	11585581		a	a	b	a	a	b	a	b	b	a	a	a	h	a	b	h	b	h	b	b	a	b	a	a	b	b	b	b	a	b	h	a	b	a	b	a	b	a	a	b	a	b	b
B06	AX-176798376	AX-176798376_B06	36.525	Arahy.16	11561314		a	a	b	a	a	b	a	b	b	a	a	a	h	a	b	h	b	h	b	b	a	b	a	a	b	b	b	b	a	b	h	a	b	a	b	a	b	a	a	b	a	b	b
B06	AX-176806595	AX-176806595_B06	36.852	Arahy.16	11585511		a	a	b	a	a	b	a	b	b	a	a	a	h	a	b	h	b	h	b	b	a	b	a	a	b	b	b	b	a	b	h	a	b	a	b	a	b	a	a	b	a	b	b
B06	AX-147252051	AX-147252051_B06	36.852	Arahy.16	11458266		a	a	b	a	a	b	a	b	b	a	a	a	h	a	b	h	b	h	b	b	a	b	a	a	b	b	b	b	a	b	h	a	b	a	b	a	b	a	a	b	a	b	b
B06	AX-176807530	AX-176807530_B06	36.852	Arahy.16	11600470		a	a	b	a	a	b	a	b	b	a	a	a	h	a	b	h	b	h	b	b	a	b	a	a	b	b	b	b	a	b	h	a	b	a	b	a	b	a	a	b	a	b	b
B06	AX-176799942	AX-176799942_B06	39.908	Arahy.16	11251839		a	a	b	a	a	h	a	b	b	a	a	a	h	a	b	-	-	h	-	-	a	-	a	a	b	-	b	h	a	h	h	a	b	a	b	a	-	a	a	b	a	b	h
B06	AX-176805195	AX-176805195_B06	44.435	Arahy.16	13032109		a	a	-	a	a	-	a	b	b	a	a	a	b	a	b	h	b	h	b	b	a	-	a	a	b	-	b	b	a	b	b	a	h	a	-	a	-	a	a	b	a	b	b
B06	AX-147252092	AX-147252092_B06	45.479	Arahy.16	13012621		a	a	b	a	a	b	a	b	b	a	a	a	b	a	b	h	b	h	b	b	a	b	a	a	b	b	b	b	a	b	b	a	h	a	b	a	b	a	a	b	a	b	b
B06	AX-176811805	AX-176811805_B06	45.922	Arahy.16	12848413		a	a	b	a	a	b	a	b	b	a	a	a	b	a	b	h	b	h	b	b	a	b	a	a	b	b	b	b	a	b	h	a	h	a	b	a	b	a	a	b	a	b	b
B06	AX-176822844	AX-176822844_B06	46.14	Arahy.16	12415978		a	a	b	a	a	b	a	b	b	a	a	a	b	a	b	h	b	h	b	b	a	b	a	a	b	b	b	b	a	b	h	a	h	a	b	a	b	a	a	b	a	b	b
B06	AX-176805569	AX-176805569_B06	46.14	Arahy.16	12416685		a	a	b	a	a	b	a	b	b	a	a	a	b	a	b	h	b	h	b	b	a	b	a	a	b	b	b	b	a	b	h	a	h	a	b	a	b	a	a	b	a	b	b
B06	AX-176802440	AX-176802440_B06	46.14	Arahy.16	12420029		a	a	b	a	a	b	a	b	b	a	a	a	b	a	b	h	b	h	b	b	a	b	a	a	b	b	b	b	a	b	h	a	h	a	b	a	b	a	a	b	a	b	b
B06	AX-177639186	AX-177639186_B06	46.357	Arahy.16	12338040		a	a	b	a	a	b	a	b	b	a	a	a	b	a	b	h	b	h	b	b	a	b	a	a	b	b	b	b	a	b	h	a	h	a	b	a	b	a	a	b	a	b	b
B06	AX-176819632	AX-176819632_B06	46.575	Arahy.16	12416615		a	a	b	a	a	b	a	b	b	a	a	a	b	a	b	h	b	h	b	b	a	b	a	a	b	b	b	b	a	b	h	a	h	a	b	a	b	a	a	b	a	b	b
B06	AX-147224627	AX-147224627_B06	46.902	Arahy.16	12917887		a	a	b	a	a	b	a	b	b	a	a	a	b	a	b	h	b	h	b	b	a	b	a	a	b	b	b	b	a	b	b	a	h	a	b	a	b	a	a	b	a	b	b
B06	AX-147252100	AX-147252100_B06	47.45	Arahy.16	13221766		a	a	b	a	a	b	a	b	b	a	a	a	b	a	b	h	b	h	b	b	a	b	a	a	b	b	b	b	a	b	b	a	h	a	b	a	b	a	a	b	a	b	b
B06	AX-176819343	AX-176819343_B06	47.559	Arahy.16	13540796		a	a	b	a	a	b	a	b	b	a	a	a	b	a	b	h	b	h	b	b	a	b	a	a	b	b	b	b	a	h	b	a	h	a	b	a	b	a	a	b	a	b	b
B06	AX-176820275	AX-176820275_B06	47.559	Arahy.16	13661741		a	a	b	a	a	b	a	b	b	a	a	a	b	a	b	h	b	h	b	b	a	b	a	a	b	b	b	b	a	h	b	a	h	a	b	a	b	a	a	b	a	b	b
B06	AX-176818138	AX-176818138_B06	48.447	Arahy.16	13628013		a	a	b	a	a	b	a	-	b	a	a	a	b	a	b	h	b	h	b	b	a	b	a	a	b	b	-	b	a	h	b	a	h	a	b	a	b	a	a	b	a	b	b
B06	AX-176822760	AX-176822760_B06	50.03	Arahy.16	13079606		a	a	b	a	a	b	a	b	b	a	a	a	b	a	b	h	b	h	b	b	a	b	a	a	b	b	b	b	a	b	b	a	h	a	b	a	b	a	a	b	a	b	b
B06	AX-176807402	AX-176807402_B06	50.691	Arahy.16	13963413		a	a	b	a	a	b	a	b	b	a	a	a	b	a	b	h	b	h	b	b	a	b	a	a	b	b	b	b	a	a	-	a	h	a	b	a	b	a	a	b	a	b	b
B06	AX-176823555	AX-176823555_B06	51.239	Arahy.16	14299398		a	a	b	a	a	b	a	b	b	a	a	a	b	a	b	h	b	h	b	b	a	b	a	a	b	b	b	b	a	h	b	a	h	a	b	a	b	h	a	b	a	b	b
B06	AX-147252179	AX-147252179_B06	52.702	Arahy.16	15312770		a	a	a	b	a	b	a	b	b	a	a	a	b	a	b	h	b	h	b	b	b	b	a	a	b	b	b	b	a	h	b	a	h	a	b	a	b	h	a	b	a	b	b
B06	AX-176819948	AX-176819948_B06	53.252	Arahy.16	15909444		a	a	a	b	a	b	a	b	b	a	a	a	b	a	b	h	b	h	b	b	b	b	a	a	b	b	b	b	a	h	b	a	h	a	b	a	b	h	a	b	a	b	b
B06	AX-176796877	AX-176796877_B06	53.36	Arahy.16	16172074		a	a	a	b	a	b	a	b	b	a	a	a	b	a	b	h	b	h	b	b	b	b	a	a	b	b	b	b	a	h	b	a	h	a	b	a	b	h	a	b	a	b	b
B06	AX-176792947	AX-176792947_B06	53.578	Arahy.16	16628640		a	a	a	b	a	b	a	b	b	a	a	a	b	a	b	h	b	h	b	b	b	b	a	a	b	b	b	b	a	h	b	a	h	a	b	a	b	h	a	b	a	b	b
B06	AX-176807746	AX-176807746_B06	54.017	Arahy.16	16646649		a	h	a	b	a	b	a	b	b	a	a	a	b	a	b	h	b	h	b	b	b	b	a	a	b	b	b	b	a	h	b	a	h	a	b	a	b	h	a	b	a	b	b
B06	AX-176822928	AX-176822928_B06	55.48	Arahy.16	21203300		a	a	a	b	a	b	a	b	b	a	a	a	b	a	b	h	b	h	b	b	b	b	a	a	b	b	b	b	a	a	b	b	h	a	b	a	b	h	a	b	a	b	b
B06	AX-147252417	AX-147252417_B06	55.697	Arahy.16	20918595		a	a	a	b	a	b	a	b	b	a	a	a	b	a	b	h	b	h	b	b	b	b	a	a	b	b	b	b	a	a	b	h	h	a	b	a	b	h	a	b	a	b	b
B06	AX-176798010	AX-176798010_B06	55.915	Arahy.16	20895822		b	a	a	b	a	b	a	b	b	a	a	a	b	a	b	h	b	-	b	b	b	b	a	a	b	b	b	b	a	a	b	h	h	a	b	a	b	h	a	b	a	b	b
B06	AX-147252426	AX-147252426_B06	56.24	Arahy.16	21093994		a	a	a	b	a	b	a	b	b	a	a	a	b	a	b	h	b	h	b	b	b	b	a	a	b	b	b	b	a	a	b	h	h	a	b	a	b	h	a	b	a	b	b
B06	AX-176823710	AX-176823710_B06	56.242	Arahy.16	21728116		a	a	a	b	a	b	a	b	b	a	a	a	b	a	b	h	b	h	b	b	b	b	a	a	b	b	b	b	a	a	b	h	h	a	b	a	b	h	a	b	a	b	b
B06	AX-176793918	AX-176793918_B06	56.35	Arahy.16	21583247		a	a	a	b	a	b	a	b	b	a	a	a	b	a	b	h	b	h	b	b	b	b	a	a	b	b	b	b	a	a	b	h	h	a	b	a	b	h	a	b	a	b	b
B06	AX-176822996	AX-176822996_B06	56.899	Arahy.16	22214117		a	a	a	b	a	b	a	b	b	a	a	a	b	a	b	h	b	h	b	b	b	b	a	a	b	b	b	b	a	a	b	h	h	a	b	a	b	h	a	b	a	b	b
B06	AX-176820950	AX-176820950_B06	57.559	Arahy.16	22756572		a	a	a	b	a	b	a	b	b	a	a	a	b	a	b	h	b	h	b	b	b	b	a	a	b	b	b	b	h	a	b	h	h	a	b	a	b	h	a	b	a	b	b
B06	AX-176817531	AX-176817531_B06	58.108	Arahy.16	23461040		a	a	a	b	a	b	a	b	b	a	a	a	b	a	b	h	b	h	b	b	b	b	a	a	b	b	b	b	a	a	b	h	h	a	b	a	b	h	a	b	a	b	b
B06	AX-176824258	AX-176824258_B06	58.108	Arahy.16	23396765		a	a	a	b	-	b	a	b	b	a	a	a	b	a	b	h	b	h	b	b	b	b	a	a	b	b	b	b	a	a	b	h	h	a	b	a	b	h	a	b	a	b	b
B06	AX-176818863	AX-176818863_B06	58.216	Arahy.16	22880694		a	a	a	b	a	b	a	b	b	a	a	a	b	a	b	h	b	h	b	b	b	b	a	a	b	b	b	b	a	a	b	h	h	a	b	a	b	h	a	b	a	b	b
B06	AX-147224204	AX-147224204_B06	58.325	Arahy.16	25352101		a	a	a	b	a	b	a	b	b	a	a	a	b	a	b	h	b	h	b	b	b	b	a	a	b	b	b	b	a	a	b	h	h	a	b	a	b	h	a	b	a	b	b
B06	AX-176796560	AX-176796560_B06	58.325	Arahy.16	24870350		a	a	a	b	a	b	a	b	b	a	a	a	b	a	b	h	b	h	b	b	b	b	a	a	b	b	b	b	a	a	b	h	h	a	b	a	b	h	a	b	a	b	b
B06	AX-176800442	AX-176800442_B06	58.433	Arahy.16	24706313		a	a	a	b	a	b	a	b	b	a	a	a	b	a	b	h	b	h	b	b	b	b	a	a	b	b	b	b	a	a	b	h	h	a	b	a	b	h	a	b	a	b	b
B06	AX-176809297	AX-176809297_B06	58.433	Arahy.16	26932648		a	a	a	b	a	b	a	b	b	a	a	a	b	a	b	h	b	h	b	b	b	b	a	a	b	b	b	b	a	a	b	-	h	a	b	a	b	h	a	b	a	b	b
B06	AX-176812547	AX-176812547_B06	58.433	Arahy.16	24529480		a	a	a	b	a	b	a	b	b	a	a	a	b	a	b	h	b	h	b	b	b	b	a	a	b	b	b	b	a	a	b	h	h	a	b	a	b	h	a	b	a	b	b
B06	AX-176797226	AX-176797226_B06	58.871	Arahy.16	27018921		a	a	a	b	a	b	a	b	b	a	a	a	b	a	b	h	b	h	b	b	b	b	a	a	b	b	b	b	a	a	b	h	h	b	b	a	b	h	a	b	a	b	b
B06	AX-147252512	AX-147252512_B06	59.532	Arahy.16	24709214		a	a	a	b	a	b	a	b	b	a	a	a	b	a	b	h	b	h	b	b	b	b	a	a	b	b	b	b	a	a	b	h	h	a	b	a	b	h	a	b	a	b	b
B06	AX-176795044	AX-176795044_B06	60.242	Arahy.16	24544617		a	a	a	b	a	b	a	b	b	a	a	h	b	a	-	-	b	b	b	b	b	b	a	a	b	b	b	b	a	a	b	h	h	a	b	a	b	-	a	b	a	b	b
B06	AX-147252588	AX-147252588_B06	61.308	Arahy.16	27364316		a	a	a	b	a	b	a	b	b	a	a	a	b	a	b	h	b	h	b	b	b	b	a	a	b	b	b	b	a	a	b	h	h	b	b	a	b	h	a	b	a	b	b
B06	AX-147227941	AX-147227941_B06	61.416	Arahy.16	27334946		a	a	a	b	a	b	a	b	b	a	a	a	b	a	b	h	b	h	b	b	b	b	a	a	b	b	b	b	a	a	b	h	h	b	b	a	b	h	a	b	a	b	b
B06	AX-176791674	AX-176791674_B06	61.416	Arahy.16	27156535		a	a	a	b	a	b	a	b	b	a	a	a	b	a	b	h	b	h	b	b	b	b	a	a	b	b	b	b	a	a	b	h	h	b	b	a	b	-	a	b	a	b	b
B06	AX-147227945	AX-147227945_B06	61.416	Arahy.16	27335170		a	a	a	b	a	b	a	b	b	a	a	a	b	a	b	-	b	h	b	b	b	b	a	a	b	b	b	b	a	a	b	h	-	b	b	a	b	h	a	b	a	b	b
B06	AX-176797482	AX-176797482_B06	62.076	Arahy.16	29193539		a	a	a	b	a	b	a	b	a	a	a	a	b	a	b	h	b	h	b	b	b	b	a	a	b	b	b	b	a	a	b	a	h	b	b	a	b	h	a	b	a	b	b
B06	AX-176822869	AX-176822869_B06	62.185	Arahy.16	28977963		a	a	a	b	a	b	a	b	a	a	a	a	b	a	b	h	b	h	b	b	b	b	a	a	b	b	b	b	a	a	b	a	h	b	b	a	b	h	a	b	a	b	b
B06	AX-176822251	AX-176822251_B06	62.397	Arahy.16	28804685		a	a	a	b	a	b	a	b	a	a	a	a	b	a	b	h	b	h	b	b	b	b	a	a	b	b	b	b	a	a	b	a	h	b	b	a	b	h	a	b	a	b	b
B06	AX-176799657	AX-176799657_B06	62.402	Arahy.16	28512481		a	a	a	b	a	b	a	b	a	a	a	a	b	a	b	h	b	h	b	b	b	b	a	a	b	b	b	b	a	a	b	a	h	b	b	a	b	h	a	b	a	b	b
B06	AX-176822240	AX-176822240_B06	62.729	Arahy.16	30895048		a	a	a	b	a	b	a	b	a	a	a	a	b	a	b	h	b	h	b	b	b	b	a	a	b	b	b	b	a	a	b	a	h	b	b	a	b	h	a	b	a	b	b
B06	AX-176808697	AX-176808697_B06	63.535	Arahy.16	28083124		a	a	a	b	a	b	a	b	a	a	a	a	b	a	b	h	h	h	b	b	b	b	a	a	b	b	b	b	a	a	b	a	h	b	b	a	b	h	a	b	a	b	b
B06	AX-176823619	AX-176823619_B06	65.943	Arahy.16	67091157		a	a	a	-	a	-	a	-	a	a	a	a	b	a	b	a	h	h	b	b	b	b	a	a	a	-	-	-	a	a	b	a	-	b	-	a	b	h	a	-	a	b	b
B06	AX-176815034	AX-176815034_B06	67.568	Arahy.16	97383122		a	a	a	b	a	b	a	b	a	a	a	a	b	a	b	a	b	h	b	b	b	b	a	a	a	b	b	b	a	a	b	a	h	b	b	a	b	h	a	b	a	b	b
B06	AX-176808710	AX-176808710_B06	68.624	Arahy.16	103465246		a	a	a	b	a	b	a	b	a	a	a	a	b	a	b	a	b	h	b	b	b	b	a	a	a	b	b	b	a	a	b	a	h	b	b	a	b	h	a	b	a	b	b
B06	AX-176809563	AX-176809563_B06	69.572	Arahy.16	104920748		a	a	a	b	a	b	a	b	a	a	a	a	b	a	b	a	b	b	b	b	b	b	a	a	a	b	b	b	a	a	b	a	h	b	b	a	b	h	a	b	a	b	b
B06	AX-147226394	AX-147226394_B06	69.79	Arahy.16	104210304		a	a	a	b	a	b	a	b	a	a	a	a	b	a	b	a	b	b	b	b	b	b	a	a	a	b	b	b	-	a	b	a	h	b	b	a	b	h	a	b	a	b	b
B06	AX-176809129	AX-176809129_B06	69.79	Arahy.16	104144473		a	a	a	b	a	b	a	b	a	a	a	a	b	a	b	a	b	b	b	b	b	b	a	a	a	b	b	b	a	a	b	a	h	b	b	a	b	h	a	b	a	b	b
B06	AX-176793340	AX-176793340_B06	70.79	Arahy.16	117116727		a	a	a	b	a	b	a	b	a	a	a	a	b	a	b	a	b	b	b	b	b	b	a	a	b	b	b	b	a	a	b	a	h	b	b	a	b	h	a	b	a	b	b
B06	AX-176796488	AX-176796488_B06	70.79	Arahy.16	117125027		a	-	a	b	a	b	a	b	a	a	a	a	b	a	b	a	b	b	b	b	b	b	a	a	b	b	b	b	a	a	b	a	h	b	b	a	b	h	a	b	a	b	b
B06	AX-176806012	AX-176806012_B06	71.45	Arahy.16	120319736		a	a	a	b	a	b	a	b	a	a	a	a	b	a	b	a	b	b	b	b	b	b	a	a	b	b	b	b	a	a	b	a	h	b	b	a	h	h	a	b	a	b	b
B06	AX-176798255	AX-176798255_B06	71.45	Arahy.16	121272633		a	a	a	b	a	b	a	b	a	a	a	a	b	a	b	a	b	b	b	b	b	b	a	a	b	b	b	b	a	a	b	a	h	b	b	a	h	h	a	b	a	b	b
B06	AX-176802785	AX-176802785_B06	71.887	Arahy.16	122060754		a	a	a	b	a	b	a	b	a	a	a	a	b	a	b	a	b	b	b	b	b	b	a	a	b	b	b	b	a	a	b	a	h	b	b	a	h	h	a	b	a	b	b
B06	AX-147218661	AX-147218661_B06	71.888	Arahy.16	121773496		a	a	a	b	a	b	a	b	a	a	a	a	b	a	b	a	b	b	b	b	b	b	a	a	b	b	b	b	a	a	b	a	h	b	b	a	h	h	a	b	a	b	b
B06	AX-176800273	AX-176800273_B06	71.888	Arahy.16	122526667		a	a	a	b	a	b	a	b	a	a	a	a	b	a	b	a	b	b	b	b	b	b	a	a	b	b	b	b	a	a	b	a	h	b	b	a	h	h	a	b	a	b	b
B06	AX-176807396	AX-176807396_B06	72.774	Arahy.16	124654200		a	a	a	b	a	b	a	b	a	a	a	a	b	a	b	a	b	b	b	b	b	b	a	a	b	b	b	b	a	a	b	a	h	a	b	a	h	h	a	b	a	b	b
B06	AX-147253199	AX-147253199_B06	73.212	Arahy.16	124989155		a	a	a	b	a	b	a	b	a	a	a	a	b	a	b	a	b	b	b	b	b	b	a	a	b	b	b	b	a	a	b	b	h	a	b	a	h	h	a	b	a	b	-
B06	AX-176816739	AX-176816739_B06	74.795	Arahy.16	129351314		b	a	a	b	a	b	a	b	a	a	a	a	b	a	b	a	b	b	b	b	b	b	a	a	b	b	b	b	a	a	b	b	h	a	b	a	h	h	a	b	a	b	b
B06	AX-147253327	AX-147253327_A06	74.903	Arahy.16	99457321		b	a	a	b	a	b	a	b	a	a	a	a	b	a	b	a	b	b	b	b	b	b	a	a	b	b	b	b	a	a	b	b	h	a	b	a	h	h	a	b	a	b	b
B06	AX-176799241	AX-176799241_B06	75.121	Arahy.16	131619364		b	a	b	b	a	b	a	b	a	a	a	a	b	a	b	a	b	b	b	b	b	b	a	a	b	b	b	b	a	a	b	b	h	a	b	a	h	h	a	b	a	b	b
B06	AX-176810330	AX-176810330_B06	75.448	Arahy.16	132596716		b	a	b	b	a	b	a	b	a	a	a	a	b	a	b	a	b	b	b	b	b	b	a	a	b	b	b	b	a	a	b	b	h	a	b	a	h	h	a	b	a	b	b
B06	AX-176813275	AX-176813275_B06	76.562	Arahy.16	133795950		b	a	b	b	a	b	a	b	a	a	a	a	b	a	b	a	b	b	b	b	b	b	a	a	b	b	b	b	a	a	b	b	h	a	b	a	h	h	a	b	a	b	b
B06	AX-176796249	AX-176796249_B06	77.677	Arahy.16	132082801		b	a	b	b	a	b	a	b	a	a	a	a	b	a	b	a	b	b	b	b	b	b	a	a	b	b	b	b	a	a	b	b	h	a	b	a	h	h	a	b	a	b	b
B06	AX-176797735	AX-176797735_B06	78.226	Arahy.16	128941157		b	a	a	b	a	b	a	b	a	a	a	a	b	a	b	a	b	b	b	b	b	b	a	a	b	b	b	b	a	a	b	b	h	a	b	a	h	h	a	b	a	b	b
B06	AX-176802608	AX-176802608_B06	78.226	Arahy.16	128398428		b	a	a	b	a	b	a	b	a	a	a	a	b	a	b	a	b	b	b	b	b	b	a	a	b	b	b	b	a	a	-	b	h	a	b	a	h	h	a	b	a	b	b
B06	AX-147225818	AX-147225818_B06	78.973	Arahy.16	127806110		b	a	a	b	a	b	a	b	a	a	a	a	b	a	b	a	b	b	b	b	b	b	a	a	b	b	b	b	a	a	b	b	h	a	b	a	h	h	a	b	a	b	b
B06	AX-176820057	AX-176820057_B06	79.217	Arahy.16	126399894		b	a	a	b	a	b	a	b	a	a	a	a	b	a	b	a	b	b	b	b	b	b	a	a	b	b	b	b	a	a	b	b	h	a	b	a	h	h	a	b	a	b	b
B06	AX-176817703	AX-176817703_B06	79.765	Arahy.16	124434910		a	a	a	b	a	b	a	b	a	a	a	a	b	a	b	a	b	b	b	b	b	b	a	a	b	b	b	b	a	a	b	a	h	a	b	a	h	a	a	b	a	b	b
B06	AX-147225779	AX-147225779_B06	80.033	Arahy.16	124482324		a	a	a	b	a	b	a	b	a	a	a	a	b	a	b	a	b	b	b	b	b	b	a	a	b	b	b	b	a	a	b	a	h	a	b	a	h	-	a	b	a	b	b
B06	AX-176823726	AX-176823726_B06	81.164	Arahy.16	123043397		a	a	a	b	a	b	a	b	a	a	a	a	b	a	b	a	b	b	b	b	b	b	a	a	b	b	b	b	a	a	b	a	h	b	b	a	h	b	a	b	a	b	b
B06	AX-176820260	AX-176820260_B06	81.847	Arahy.16	121275818		a	a	a	b	a	b	a	b	a	a	a	a	b	a	b	a	b	b	b	b	b	b	a	a	b	b	b	b	a	a	-	a	h	b	b	a	h	-	a	b	a	b	b
B06	AX-176797523	AX-176797523_B06	82.995	Arahy.16	115938988		a	a	a	b	a	b	a	b	a	a	a	a	b	a	b	a	b	b	b	b	b	b	a	a	a	b	b	b	a	a	b	a	h	b	b	a	b	h	a	b	a	b	b
B06	AX-147253047	AX-147253047_B06	83.322	Arahy.16	113372947		a	a	a	b	a	b	a	b	a	a	a	a	b	a	b	a	b	b	b	b	b	b	a	a	a	b	b	b	a	a	b	a	h	b	b	a	b	h	a	b	a	b	b
B06	AX-147253048	AX-147253048_B06	83.365	Arahy.16	113372222		a	a	a	b	a	b	a	b	a	a	a	a	b	a	b	a	b	b	b	b	b	b	a	a	a	b	b	b	a	a	b	a	h	b	b	a	b	h	a	b	a	b	b
B06	AX-176823191	AX-176823191_B06	83.43	Arahy.16	112337337		a	a	a	b	a	b	a	b	a	a	a	a	b	a	b	a	b	b	b	b	b	b	a	a	a	b	b	b	a	a	b	a	h	b	b	a	b	h	a	b	a	b	b
B06	AX-176807603	AX-176807603_B06	83.539	Arahy.16	116256363		a	a	a	b	a	b	a	b	a	a	a	a	b	a	b	a	b	b	b	b	b	b	a	a	a	b	b	b	a	a	b	a	h	b	b	a	b	h	a	b	a	b	b
B06	AX-176823980	AX-176823980_B06	83.647	Arahy.16	112058348		a	a	a	b	a	b	a	b	a	a	a	a	b	a	b	a	b	b	b	b	b	b	a	a	a	b	b	b	a	a	b	a	h	b	b	a	b	h	a	b	a	b	b
B06	AX-176794151	AX-176794151_B06	84.081	Arahy.16	111670788		a	a	a	b	a	b	a	-	a	a	a	a	b	a	b	a	b	b	b	b	b	b	a	a	a	b	b	b	a	a	b	a	-	b	b	a	b	h	a	b	a	b	-
B06	AX-176822268	AX-176822268_B06	84.522	Arahy.16	109918650		a	a	a	b	a	b	a	b	a	a	a	a	b	a	b	a	b	b	b	b	b	b	a	a	a	b	b	b	a	a	b	a	h	b	b	a	b	h	a	b	a	b	b
B06	AX-176819748	AX-176819748_B06	84.85	Arahy.16	109773619		a	-	a	b	a	b	a	b	a	a	-	a	b	-	b	a	b	b	b	b	b	b	-	a	-	b	b	b	a	h	b	a	h	b	b	a	b	h	a	b	a	b	b
B06	AX-176819194	AX-176819194_B06	85.367	Arahy.16	108701159		a	a	a	b	a	b	a	b	a	a	a	a	b	a	b	a	b	b	b	b	b	b	a	a	a	b	b	b	a	a	b	a	h	b	b	a	b	h	a	b	a	b	b
B06	AX-176817644	AX-176817644_B06	85.615	Arahy.16	108702890		a	a	a	b	a	b	a	b	a	a	a	a	b	a	b	a	b	b	b	b	b	b	a	a	a	b	b	b	a	a	b	a	h	b	b	a	b	h	a	b	a	b	b
B06	AX-176817636	AX-176817636_B06	86.164	Arahy.16	107783890		a	a	a	b	a	b	a	b	a	a	a	a	b	a	b	a	b	b	b	b	b	b	a	a	a	b	b	b	a	a	b	a	h	b	b	a	b	h	a	b	a	b	b
B06	AX-147252992	AX-147252992_B06	86.21	Arahy.16	108428229		a	a	a	b	a	b	a	b	a	a	a	a	b	a	b	a	b	b	b	b	b	b	a	a	a	b	b	b	a	a	b	a	h	b	b	a	b	h	a	b	a	b	b
B06	AX-147252990	AX-147252990_B06	86.272	Arahy.16	108243075		a	a	a	b	a	b	a	b	a	a	a	a	b	a	b	a	b	b	b	b	b	b	a	a	a	b	b	b	a	a	b	a	h	b	b	a	b	h	a	b	a	b	b
B06	AX-176823986	AX-176823986_B06	87.634	Arahy.16	116595872		a	a	a	b	a	b	a	b	a	a	a	a	b	a	b	a	-	b	b	b	b	b	a	a	a	b	b	-	a	a	b	a	h	b	b	a	b	h	a	b	a	b	b
B06	AX-176812167	AX-176812167_B06	88.929	Arahy.16	114912513		a	a	a	b	a	b	a	b	a	a	a	a	b	a	b	a	b	b	b	b	b	b	a	a	a	b	b	b	a	a	b	a	h	b	b	a	b	h	a	b	a	b	b
B06	AX-176817665	AX-176817665_B06	90.608	Arahy.16	112639679		a	a	a	b	a	b	a	b	a	a	a	a	b	a	b	a	-	b	-	h	b	b	a	a	a	b	b	b	a	a	b	h	h	b	b	a	b	h	a	b	a	b	b
B06	AX-176806302	AX-176806302_B06	94.329	Arahy.16	102684798		a	a	a	b	a	b	a	-	a	a	a	a	b	a	b	a	h	h	h	-	-	b	a	a	a	-	b	-	a	a	-	a	-	b	b	a	b	h	a	-	a	b	b
B06	AX-176821768	AX-176821768_B06	98.82	Arahy.16	101508268		a	a	a	h	a	h	a	h	a	a	a	a	-	a	h	a	-	h	-	h	b	h	a	a	a	b	-	h	a	a	h	a	h	h	-	a	-	h	a	-	a	b	-
B06	AX-176817461	AX-176817461_B06	103.216	Arahy.16	46383226		a	a	a	b	a	h	a	b	a	a	a	a	b	h	h	a	-	-	h	b	b	b	a	a	a	b	-	b	a	a	b	a	h	-	b	a	h	h	-	-	a	b	-
B06	AX-176808286	AX-176808286_B06	107.004	Arahy.16	82056714		a	a	a	-	a	b	a	-	a	a	a	a	-	a	h	a	-	h	h	b	b	-	a	a	a	b	h	b	a	a	b	a	h	b	b	a	b	h	a	b	a	b	b
B06	AX-176811220	AX-176811220_B06	109.416	Arahy.16	74210553		a	a	a	b	a	b	a	b	a	a	a	a	b	a	b	a	b	a	b	b	b	h	a	a	a	b	b	b	a	a	b	a	a	b	b	a	b	a	a	b	a	-	b
B06	AX-177639086	AX-177639086_B06	109.993	Arahy.16	72446183		a	a	a	b	a	b	a	b	a	a	a	a	b	a	b	a	b	a	b	b	h	b	a	a	a	b	b	b	a	a	b	a	a	b	b	a	b	a	a	b	a	b	b
B06	AX-176807407	AX-176807407_B06	110.102	Arahy.16	73737035		a	a	a	b	a	b	a	b	a	a	a	a	b	a	b	a	b	a	b	b	b	b	a	a	a	b	b	b	a	a	b	a	a	b	b	a	b	a	a	b	a	b	b
B06	AX-147227307	AX-147227307_B06	110.21	Arahy.16	72446589		a	a	a	b	a	b	a	b	a	a	a	a	b	a	b	a	b	a	b	b	b	b	a	a	a	b	b	b	a	a	b	a	a	b	b	a	b	a	a	b	a	b	b
B06	AX-147222273	AX-147222273_B06	110.266	Arahy.16	73636422		a	a	a	b	a	b	a	b	a	a	a	a	b	a	b	a	b	a	b	b	b	b	a	a	a	b	b	b	a	a	b	a	a	b	b	a	b	a	a	b	a	b	b
B06	AX-176807053	AX-176807053_B06	110.318	Arahy.16	63073292		a	a	a	b	a	b	a	b	a	a	a	a	b	a	b	a	b	a	b	b	b	b	a	a	a	b	b	b	a	a	b	a	a	b	b	a	b	a	a	b	a	b	b
B06	AX-176820578	AX-176820578_B06	110.342	Arahy.16	67576855		a	a	a	b	a	b	a	b	a	a	a	a	b	a	b	a	b	a	b	b	b	b	a	a	a	b	b	b	a	a	b	a	a	b	b	a	b	a	a	b	a	b	b
B06	AX-176802124	AX-176802124_B06	110.446	Arahy.16	73754142		a	a	a	b	a	b	a	b	a	a	a	a	b	a	b	a	b	a	b	b	b	b	a	a	a	b	b	b	a	a	b	a	a	b	b	a	b	a	a	b	a	b	b
B06	AX-147225417	AX-147225417_B06	110.864	Arahy.16	63080933		a	a	a	b	a	b	a	b	a	a	-	a	b	a	b	a	b	h	b	b	b	b	a	a	a	b	b	b	a	a	b	a	-	b	b	a	b	a	a	b	a	b	b
B06	AX-177637615	AX-177637615_B06	111.022	Arahy.16	72445838		a	a	a	b	a	b	a	b	a	a	a	a	b	a	b	a	b	-	b	b	b	b	a	a	a	b	b	b	a	a	b	a	a	b	b	a	b	-	a	b	a	b	b
B06	AX-147225342	AX-147225342_B06	111.621	Arahy.16	73777878		a	a	a	b	a	b	a	b	a	a	a	a	b	a	b	a	b	h	b	b	b	b	a	a	a	b	b	b	a	a	b	a	-	b	b	a	b	-	a	b	a	b	b
B06	AX-147227316	AX-147227316_B06	111.707	Arahy.16	72445760		a	a	a	b	a	b	a	b	a	a	a	a	b	a	b	a	b	h	b	b	b	b	a	a	a	b	b	b	a	a	b	a	h	b	b	a	b	h	a	-	a	b	b
B06	AX-147227313	AX-147227313_B06	111.858	Arahy.16	72446212		a	a	a	b	a	b	a	b	a	a	a	a	b	a	b	a	b	h	b	b	b	b	a	a	a	b	b	b	a	a	b	a	h	b	b	a	b	h	a	b	a	b	b
B06	AX-147227310	AX-147227310_B06	112.022	Arahy.16	72446442		a	a	a	b	a	b	a	b	a	a	a	a	b	a	b	a	b	h	b	b	b	b	a	a	a	b	b	b	a	a	b	a	h	b	b	a	b	h	a	b	a	b	b
B06	AX-147227317	AX-147227317_B07	112.137	Arahy.16	4902542		a	a	a	b	a	b	a	b	a	a	a	a	b	a	b	a	b	h	b	b	b	b	a	a	a	b	b	b	a	a	b	a	h	b	b	-	b	h	a	b	a	b	b
B06	AX-147227312	AX-147227312_B06	112.68	Arahy.16	72446276		a	a	a	b	a	b	a	b	a	a	a	a	b	a	b	a	b	h	b	b	b	b	a	a	a	b	b	b	a	-	b	a	h	b	b	a	b	h	a	b	a	b	b
B06	AX-177639598	AX-177639598_B06	112.977	Arahy.16	72574982		a	-	a	b	a	b	a	b	a	a	a	a	b	a	b	a	b	h	b	b	b	b	a	a	a	b	b	b	a	a	b	a	-	b	b	a	b	-	a	b	a	b	b
B06	AX-176791337	AX-176791337_B06	113.167	Arahy.16	72446468		a	-	a	b	a	b	a	b	a	a	a	a	b	a	b	a	b	-	b	b	b	b	a	a	a	b	b	b	a	a	b	a	-	b	b	a	b	h	a	b	a	b	b
B06	AX-147225341	AX-147225341_B06	113.498	Arahy.16	73777983		a	a	a	b	a	b	a	b	a	a	a	-	b	a	b	a	b	h	b	b	b	b	a	a	a	b	b	b	a	a	b	a	h	b	b	a	b	h	a	b	a	b	b
B06	AX-176816882	AX-176816882_B06	113.5	Arahy.16	52915145		a	a	a	b	a	b	a	b	a	a	a	a	b	a	b	a	b	h	b	b	b	b	a	a	a	b	b	b	a	a	b	a	h	b	b	a	b	-	a	b	a	b	b
B06	AX-147252932	AX-147252932_A06	113.5	Arahy.16	69813578		a	a	a	b	a	b	a	b	a	a	a	a	b	a	b	a	b	h	b	b	b	b	a	a	a	b	b	b	a	a	b	a	h	b	b	a	b	h	a	b	a	b	b
B06	AX-147225387	AX-147225387_B06	113.554	Arahy.16	71799213		a	a	a	b	a	b	a	b	a	a	a	a	b	a	b	a	b	h	b	b	b	b	a	a	a	b	b	b	a	a	b	a	-	b	b	a	b	-	a	b	a	b	b
B06	AX-176816017	AX-176816017_B06	113.608	Arahy.16	67835580		a	a	a	b	a	b	a	b	a	a	a	a	b	a	b	a	b	h	b	b	b	b	a	a	a	b	b	b	a	a	b	a	h	b	b	a	b	h	a	b	a	b	b
B06	AX-176816284	AX-176816284_B06	113.608	Arahy.16	43478935		a	a	a	b	a	b	a	b	a	a	a	a	b	a	b	a	b	h	b	b	b	b	a	a	a	b	b	b	a	a	b	a	h	b	b	a	b	h	a	b	a	b	b
B06	AX-176808560	AX-176808560_B06	113.613	Arahy.16	48744049		a	a	a	b	a	b	a	b	a	a	a	a	b	a	b	a	b	h	b	b	b	b	a	a	a	b	b	b	a	a	b	a	h	b	b	a	b	h	a	b	a	b	b
B06	AX-147227306	AX-147227306_B07	113.826	Arahy.16	4901567		a	a	a	b	a	b	a	b	a	a	a	a	b	a	b	a	b	h	b	b	b	b	a	a	a	b	b	b	a	a	b	a	h	b	b	a	b	h	a	b	a	b	b
B06	AX-176800259	AX-176800259_B06	114.442	Arahy.16	100280932		a	a	a	b	a	b	a	b	a	a	a	a	b	a	b	a	b	h	b	b	b	b	a	a	a	b	b	b	a	a	b	a	h	b	b	a	b	h	a	b	a	b	b
B06	AX-176802759	AX-176802759_B06	114.593	Arahy.16	99429146		a	a	a	b	a	b	a	b	a	a	a	a	b	a	b	a	b	h	b	b	b	b	a	a	a	b	b	b	a	a	b	a	h	b	b	a	b	h	a	b	a	b	b
B06	AX-176817622	AX-176817622_B06	114.813	Arahy.16	101518864		a	a	a	b	a	b	a	b	a	a	a	-	b	a	b	a	b	h	b	b	b	b	a	a	h	b	b	b	a	a	b	-	h	b	b	a	b	h	a	b	a	b	b
B06	AX-176817620	AX-176817620_B06	115.028	Arahy.16	99438314		a	a	a	b	a	b	a	b	a	a	a	h	b	a	b	a	b	h	b	b	b	b	a	a	a	b	b	b	a	a	b	a	h	b	b	a	b	h	a	b	a	b	b
B06	AX-176797982	AX-176797982_B06	115.137	Arahy.16	98223936		a	a	a	b	a	b	a	b	a	a	a	a	b	a	b	a	b	h	b	b	b	b	a	a	a	b	b	b	a	a	b	a	h	b	b	a	b	h	a	b	a	b	b
B06	AX-176801957	AX-176801957_B06	115.137	Arahy.16	100189992		a	a	a	b	a	b	a	b	a	a	a	a	b	a	b	a	b	h	b	b	b	b	a	a	a	b	b	b	a	a	b	a	h	b	b	a	b	h	a	b	a	b	b
B06	AX-147252963	AX-147252963_B06	115.137	Arahy.16	98148983		a	a	a	b	a	b	a	b	-	a	a	a	b	a	b	a	b	h	b	b	b	b	a	a	a	b	b	b	a	a	b	a	h	b	b	a	b	h	a	b	a	b	b
B06	AX-176797902	AX-176797902_B06	115.245	Arahy.16	100528753		a	a	a	b	-	b	a	b	a	a	a	a	b	a	b	a	b	-	b	b	b	b	a	a	a	b	b	b	a	a	b	a	h	b	b	a	b	h	a	b	a	b	b
B06	AX-176817614	AX-176817614_B06	115.462	Arahy.16	97790369		a	a	a	b	a	b	a	b	a	a	a	a	b	a	b	a	b	h	b	b	b	b	a	a	a	b	b	b	a	a	b	a	h	b	b	a	b	h	a	b	a	b	b
B06	AX-176821334	AX-176821334_B06	115.571	Arahy.16	97131042		a	a	a	b	a	b	a	b	a	a	a	a	b	a	b	a	b	h	b	b	b	b	a	a	a	b	b	b	a	a	b	a	h	b	b	a	b	h	a	b	a	b	b
B06	AX-176822914	AX-176822914_B06	115.898	Arahy.16	45656878		a	a	a	b	a	b	a	b	a	a	a	a	b	a	b	a	b	h	b	b	b	b	a	a	a	b	b	b	a	a	b	a	h	b	b	a	b	h	a	b	a	b	b
B06	AX-176805389	AX-176805389_B06	116.484	Arahy.16	46878016		a	a	a	b	a	b	a	b	a	a	a	a	b	a	b	a	b	h	b	b	b	b	a	a	a	b	b	b	a	a	b	a	h	b	b	a	b	h	a	b	a	b	b
B06	AX-176798900	AX-176798900_B06	117.529	Arahy.16	91296870		a	a	a	b	a	-	a	b	a	a	a	a	b	a	b	a	b	-	b	b	b	-	a	a	a	b	b	b	a	a	b	a	h	b	b	a	b	h	a	b	a	b	-
B06	AX-176823409	AX-176823409_B06	118	Arahy.16	36671306		a	a	a	b	a	b	a	b	a	a	a	a	b	a	b	h	b	h	b	b	b	b	a	a	a	b	b	b	a	a	b	a	h	b	b	a	b	h	a	b	a	b	b
B06	AX-176803084	AX-176803084_B06	118.327	Arahy.16	39652639		a	a	a	b	a	b	a	b	a	a	a	a	b	a	b	h	b	h	b	b	b	b	a	a	a	b	b	b	a	a	b	a	h	b	b	a	b	h	a	b	a	b	b
B06	AX-176819397	AX-176819397_B06	118.708	Arahy.16	38118505		a	a	a	b	a	b	a	b	a	a	a	a	b	a	b	h	b	h	b	b	b	b	a	a	a	b	b	b	a	a	b	a	h	b	b	a	b	h	a	b	a	b	b
B06	AX-176805764	AX-176805764_B06	119.092	Arahy.16	40887269		a	a	a	b	a	b	a	b	a	a	a	h	b	a	b	h	b	h	b	b	-	b	-	a	a	b	b	b	a	a	b	-	h	b	-	a	b	h	a	b	a	b	b
B06	AX-176821775	AX-176821775_B06	119.582	Arahy.16	38047178		a	a	a	b	a	b	a	b	a	a	a	a	b	a	b	h	b	h	b	b	b	b	a	a	a	b	b	b	a	a	b	a	h	b	b	a	b	h	a	b	a	b	b
B06	AX-176793218	AX-176793218_B06	120.069	Arahy.16	58619462		a	a	a	b	a	b	-	b	a	a	a	a	b	a	b	-	b	h	b	b	b	b	a	a	a	b	b	b	a	a	b	a	h	b	b	a	b	h	a	b	a	b	b
B06	AX-147252883	AX-147252883_B06	120.078	Arahy.16	71800310		a	a	a	b	a	b	a	b	a	a	a	a	b	a	b	a	b	h	b	b	b	b	a	a	a	b	b	b	a	a	b	a	h	b	b	a	b	h	a	b	a	b	b
B06	AX-177638792	AX-177638792_B06	120.183	Arahy.16	72110357		a	a	a	b	a	b	a	b	a	a	a	-	b	a	b	a	b	h	b	b	b	b	a	a	a	b	b	b	a	a	b	a	-	b	b	a	b	h	a	b	a	b	b
B06	AX-176817574	AX-176817574_B06	120.295	Arahy.16	42576741		a	a	a	b	a	b	a	b	a	a	a	a	b	a	b	a	b	h	b	b	b	b	a	a	a	b	b	b	a	a	b	a	h	b	b	a	b	h	a	b	a	b	b
B06	AX-176792900	AX-176792900_B06	120.512	Arahy.16	58260945		a	a	a	b	a	b	a	b	a	a	a	a	b	a	b	a	b	h	b	b	b	b	a	a	a	b	b	b	a	a	b	a	h	b	b	a	b	h	a	b	a	b	b
B06	AX-176814107	AX-176814107_B06	120.73	Arahy.16	50434334		a	a	a	b	a	b	a	b	a	a	a	a	b	a	b	a	b	h	b	b	b	b	a	a	a	b	b	b	a	a	b	a	h	b	b	a	b	h	a	b	a	b	b
B06	AX-147225416	AX-147225416_A06	120.838	Arahy.16	49700528		a	a	a	b	a	b	a	b	a	a	a	a	b	a	b	a	b	h	b	b	b	b	a	a	a	b	b	b	a	a	b	a	h	b	b	a	b	h	a	b	a	b	b
B06	AX-147237054	AX-147237054_B06	120.991	Arahy.16	72575364		a	a	a	b	a	b	a	b	a	a	a	a	b	a	b	a	b	h	b	b	b	b	a	a	a	b	b	b	a	a	b	a	h	b	b	a	b	h	a	b	a	b	b
B06	AX-176810198	AX-176810198_B06	121.232	Arahy.16	61155128		a	-	a	b	a	b	a	b	a	a	a	a	b	a	b	a	b	h	b	b	b	b	a	a	a	b	b	b	a	a	b	a	h	b	b	a	b	h	a	b	a	b	b
B06	AX-176822704	AX-176822704_B06	121.383	Arahy.16	13049791		a	a	a	b	a	b	a	b	a	a	a	a	b	a	b	a	b	h	b	b	b	b	a	a	a	b	b	b	a	a	b	a	h	b	b	a	b	h	a	b	a	b	b
B06	AX-176817568	AX-176817568_B06	121.383	Arahy.16	52248933		a	a	a	b	a	b	a	b	a	a	a	a	b	-	b	a	b	h	b	b	b	b	a	a	a	b	b	b	a	a	b	a	h	b	b	a	b	h	a	b	a	b	b
B06	AX-147252856	AX-147252856_B06	121.383	Arahy.16	59243414		a	a	a	b	a	b	a	b	a	a	a	a	b	a	b	a	b	h	b	b	b	b	a	a	a	b	b	b	a	a	b	a	h	b	b	a	b	h	a	b	a	b	b
B06	AX-176804145	AX-176804145_B06	121.491	Arahy.16	47074737		a	a	a	b	a	b	a	b	a	a	a	a	b	a	b	a	b	-	b	b	b	b	a	a	a	b	b	b	a	a	b	a	-	b	b	a	b	h	a	b	a	b	b
B06	AX-176809051	AX-176809051_B06	121.599	Arahy.16	86781365		a	a	a	b	a	b	a	b	a	a	a	a	b	a	b	a	b	h	b	b	b	b	a	a	a	b	b	b	a	a	b	a	h	b	b	a	b	h	a	b	a	b	b
B06	AX-176816434	AX-176816434_B06	121.599	Arahy.16	59736600		a	a	-	b	a	b	a	b	a	a	a	a	b	a	b	a	b	h	b	b	b	b	a	a	a	b	b	b	a	a	b	a	h	b	b	a	b	h	a	b	a	b	b
B06	AX-176818768	AX-176818768_B06	121.599	Arahy.16	55596288		a	a	a	b	a	b	a	b	a	a	a	a	b	a	b	a	b	h	b	b	b	b	a	a	a	b	b	b	a	a	b	a	h	b	b	a	b	-	a	b	a	b	b
B06	AX-176823869	AX-176823869_B06	121.642	Arahy.16	77306543		a	a	a	b	a	b	a	b	a	a	a	a	b	a	b	a	b	h	b	b	b	b	a	a	a	b	b	b	a	a	b	a	h	b	b	a	b	h	a	b	a	b	b
B06	AX-176804451	AX-176804451_B06	121.708	Arahy.16	48201814		a	a	a	b	a	b	a	b	a	a	a	a	b	a	b	a	b	h	b	b	b	b	a	a	a	b	b	b	a	a	b	a	h	b	b	a	b	-	a	b	a	b	b
B06	AX-176804766	AX-176804766_B06	121.708	Arahy.16	53722619		a	a	a	b	a	b	a	b	a	a	a	a	b	a	b	a	b	h	b	b	b	b	a	a	a	b	b	b	a	a	b	a	h	b	b	a	b	h	a	b	a	b	b
B06	AX-176821796	AX-176821796_B06	121.816	Arahy.16	38607329		a	a	a	b	a	b	a	b	a	a	a	a	b	a	b	h	b	h	b	b	b	b	a	a	a	b	b	b	a	a	b	a	h	b	b	a	b	h	a	b	a	b	b
B06	AX-176793494	AX-176793494_B06	121.816	Arahy.16	35238500		a	a	a	b	a	b	a	b	a	a	a	a	b	a	b	h	b	h	b	b	b	b	a	a	a	b	b	b	a	a	b	a	h	b	b	a	b	-	a	b	a	b	b
B06	AX-176814979	AX-176814979_B06	121.876	Arahy.16	35392492		a	a	a	b	a	b	a	b	a	a	a	a	b	a	b	h	b	h	b	b	b	b	a	a	a	b	b	b	a	a	b	a	h	b	b	a	b	h	a	b	a	b	b
B06	AX-147252749	AX-147252749_B06	121.924	Arahy.16	37070534		a	a	a	b	a	b	a	b	a	a	a	a	b	a	b	h	b	h	b	b	b	b	a	a	a	b	b	b	a	a	b	a	h	b	b	a	b	h	a	b	a	b	b
B06	AX-176797089	AX-176797089_B06	122.251	Arahy.16	34358022		a	a	a	b	a	b	a	b	a	a	a	a	b	a	b	h	b	h	b	b	b	b	a	a	b	b	b	b	a	a	b	a	-	b	b	a	b	h	a	b	a	b	b
B06	AX-176791837	AX-176791837_B06	122.469	Arahy.16	34436017		a	a	a	b	a	b	a	b	a	a	a	a	b	a	b	h	b	h	b	b	b	b	a	a	b	b	b	b	a	a	b	a	h	b	b	a	b	h	a	b	a	b	b
B06	AX-176822503	AX-176822503_B06	122.686	Arahy.16	33921242		a	a	a	b	a	b	a	b	a	a	a	a	b	a	b	h	b	h	b	b	b	b	a	a	b	b	b	b	a	a	b	a	h	b	b	a	b	h	a	b	a	b	b
B06	AX-147252687	AX-147252687_A06	122.795	Arahy.16	21184343		a	a	a	b	a	b	a	b	a	a	a	a	b	a	b	h	b	h	b	b	b	b	a	a	b	b	b	b	a	a	b	a	h	b	b	a	b	-	a	b	a	b	b
B06	AX-147252686	AX-147252686_A06	122.903	Arahy.16	21183593		a	a	a	b	a	b	a	b	a	a	a	a	b	a	b	-	b	h	b	b	b	b	a	a	b	b	b	b	a	a	b	a	h	b	b	a	b	h	a	b	a	b	b
B06	AX-147252688	AX-147252688_A06	122.903	Arahy.16	21188258		a	a	a	b	a	b	a	b	a	a	a	a	b	a	b	-	b	h	b	b	b	b	a	a	b	b	b	b	a	a	b	a	h	b	b	a	b	h	a	b	a	b	b
B06	AX-147225216	AX-147225216_A06	122.905	Arahy.16	21185560		a	a	a	b	a	b	a	b	a	a	a	a	b	a	b	h	b	h	b	b	b	b	a	a	b	b	b	b	a	a	b	a	h	b	b	a	b	h	a	b	a	b	b
B06	AX-176793071	AX-176793071_B06	123.23	Arahy.16	34504982		a	a	a	b	a	b	a	b	a	a	a	a	b	a	b	h	b	h	b	b	b	b	a	a	b	b	b	b	a	a	b	a	h	b	b	a	b	h	a	b	a	b	b
B06	AX-176819292	AX-176819292_B06	123.339	Arahy.16	34624611		a	a	a	b	a	b	a	b	a	a	a	a	b	a	b	h	b	h	b	b	b	b	a	a	b	b	b	b	a	a	b	a	h	b	b	a	b	h	a	b	a	b	b
B06	AX-176820158	AX-176820158_B06	123.556	Arahy.16	38021070		a	a	a	b	a	b	a	b	a	a	a	a	b	a	b	h	b	h	b	b	b	b	a	a	a	b	b	b	a	a	b	a	h	b	b	a	b	h	a	b	a	b	b
B06	AX-147252748	AX-147252748_B06	123.665	Arahy.16	37069600		a	a	a	b	a	b	a	b	a	a	a	a	b	a	b	h	b	a	b	b	b	b	a	a	a	b	b	b	a	a	b	a	-	b	b	a	-	h	a	b	a	b	b
B06	AX-147208618	AX-147208618_B06	123.96	Arahy.16	67578338		a	a	a	b	a	b	a	b	a	a	a	a	b	a	b	a	b	-	b	b	b	b	a	a	a	b	b	b	a	a	b	a	h	b	b	a	b	h	a	b	a	b	b
B06	AX-176802724	AX-176802724_B06	123.991	Arahy.16	56257108		a	a	a	b	a	b	-	b	a	a	a	a	b	a	b	a	b	b	b	b	b	b	a	a	a	b	b	b	a	a	b	a	h	b	b	a	b	-	a	b	a	b	b
B06	AX-147252896	AX-147252896_B06	123.991	Arahy.16	73780966		a	a	a	b	a	b	a	b	a	a	a	a	b	a	b	a	b	-	b	b	b	b	a	a	a	b	b	b	a	a	b	a	h	b	b	a	b	h	a	b	a	b	b
B06	AX-176801265	AX-176801265_B06	124.663	Arahy.16	37790730		a	a	a	b	a	b	a	b	a	a	a	a	b	a	b	-	b	b	b	b	b	b	a	a	a	b	b	b	a	a	b	a	h	b	b	a	b	b	a	b	a	b	b
B06	AX-147219869	AX-147219869_B06	125.319	Arahy.16	35014805		a	a	a	b	a	b	a	b	a	a	a	a	b	a	b	h	b	h	b	b	b	b	a	a	a	b	b	b	a	a	b	a	h	b	b	a	b	h	a	b	a	b	b
B06	AX-176822652	AX-176822652_B06	129.886	Arahy.16	33012551		a	a	a	-	a	b	a	h	a	a	a	a	-	a	b	h	b	h	b	b	b	b	a	a	b	b	b	b	a	a	b	a	h	-	b	a	b	h	a	h	a	b	b
B07	AX-176805333	AX-176805333_B07	0	Arahy.17	12754200		a	b	b	b	b	b	b	b	a	a	a	a	a	b	a	a	a	a	b	b	a	b	a	a	b	a	b	a	a	b	b	a	a	b	b	b	a	b	a	b	b	b	b
B07	AX-176817995	AX-176817995_B07	4.45	Arahy.17	17497216		a	b	b	b	b	b	b	a	a	a	a	a	b	b	b	a	a	a	b	b	a	b	a	a	b	a	b	a	a	a	b	a	a	b	b	b	a	b	a	b	b	b	b
B07	AX-147255614	AX-147255614_B07	9.71	Arahy.17	39751186		b	b	b	b	b	b	a	a	a	a	a	a	b	b	a	a	a	a	b	b	a	b	a	a	a	a	h	a	a	a	b	b	a	b	b	b	a	b	b	b	b	b	b
B07	AX-176804891	AX-176804891_B07	9.927	Arahy.17	44313483		b	b	b	b	b	b	a	a	a	a	a	a	b	b	a	a	a	a	b	b	a	b	a	a	a	a	h	a	a	a	b	b	a	b	b	b	a	b	b	b	b	b	b
B07	AX-147256000	AX-147256000_A08	11.747	Arahy.17	2442471		b	b	b	b	b	b	a	a	a	a	a	a	b	b	a	a	a	a	b	b	a	b	a	a	a	a	h	a	a	a	b	b	a	b	b	b	a	b	b	b	b	b	b
B07	AX-177638909	AX-177638909_B07	12.748	Arahy.17	118993992		b	b	b	b	b	b	a	a	a	a	a	a	b	b	a	a	a	a	b	b	a	b	a	a	h	a	h	a	a	a	b	b	a	b	b	b	a	b	b	b	b	b	a
B07	AX-176809651	AX-176809651_B07	14.331	Arahy.17	122104193		b	b	b	b	b	b	a	a	a	a	a	a	b	b	a	a	a	a	b	b	a	b	a	a	h	a	h	a	a	a	b	b	a	b	b	b	a	b	b	b	b	b	a
B07	AX-177640139	AX-177640139_B07	25.385	Arahy.17	128010370		a	b	b	b	b	b	a	a	b	a	a	a	b	h	a	a	a	a	b	b	a	b	b	b	b	a	h	h	a	a	a	b	h	b	b	b	a	b	h	b	b	b	a
B07	AX-177638964	AX-177638964_B07	25.934	Arahy.17	128030181		a	b	b	b	b	b	a	a	b	a	a	a	b	a	a	a	a	a	b	b	a	b	b	b	-	a	h	h	a	a	a	b	h	b	b	-	a	b	h	b	b	b	a
B07	AX-177639436	AX-177639436_B07	26.826	Arahy.17	128167538		a	b	b	b	b	b	a	a	b	a	a	a	b	h	a	a	a	a	b	b	a	b	b	b	b	a	h	h	a	a	a	b	h	b	b	b	a	b	h	b	b	b	a
B07	AX-176822599	AX-176822599_B07	27.489	Arahy.17	128462271		a	b	b	b	b	b	a	a	b	a	h	a	b	h	a	a	a	a	b	b	a	b	b	h	b	a	h	h	a	a	a	b	-	b	b	b	a	b	h	b	b	b	a
B07	AX-176808161	AX-176808161_B07	28.223	Arahy.17	128607886		a	b	b	b	b	b	a	a	b	a	-	a	b	h	-	a	a	a	b	b	a	b	b	b	b	a	a	h	a	a	a	b	h	b	b	b	a	b	-	b	b	b	a
B07	AX-176821561	AX-176821561_B07	29.999	Arahy.17	128874938		a	b	b	b	b	b	a	a	b	b	-	a	b	-	a	a	a	a	b	b	a	b	b	b	b	a	a	a	b	a	a	b	h	-	b	b	a	b	-	b	b	b	a
B07	AX-147256630	AX-147256630_B07	33.958	Arahy.17	129792254		a	b	b	a	b	b	a	a	b	h	h	a	b	b	a	a	a	a	b	b	a	b	b	b	b	a	a	b	b	a	a	b	h	b	b	b	a	b	a	b	b	b	a
B07	AX-176815698	AX-176815698_B07	34.311	Arahy.17	129898644		a	b	b	a	-	b	a	a	b	h	-	a	b	b	a	a	a	a	b	b	a	b	b	b	b	a	a	b	b	a	a	b	b	b	b	b	a	b	a	b	b	b	a
B07	AX-147256649	AX-147256649_B07	35.75	Arahy.17	130038515		a	b	b	a	b	b	a	a	b	h	h	b	b	b	a	a	a	a	b	b	a	b	b	b	b	a	a	b	b	a	a	b	h	b	b	b	a	b	a	b	b	b	a
B07	AX-176817885	AX-176817885_B07	36.188	Arahy.17	130125182		a	b	b	a	b	b	a	a	b	h	h	b	b	b	a	a	a	a	b	b	a	b	b	b	b	a	a	b	b	a	a	b	h	b	b	b	a	b	a	b	b	b	a
B07	AX-176803520	AX-176803520_B07	37.534	Arahy.17	130338487		a	b	b	a	b	b	a	a	b	h	h	-	b	b	a	a	b	b	b	b	a	b	b	b	b	a	a	b	b	a	a	b	h	b	b	b	a	b	a	b	b	b	a
B07	AX-177638442	AX-177638442_B07	38.649	Arahy.17	130534476		a	b	b	a	b	b	a	a	b	a	-	b	b	b	a	a	b	b	b	b	a	b	b	b	b	a	a	b	b	a	a	b	h	b	b	b	b	b	a	b	b	b	a
B07	AX-177637214	AX-177637214_B07	38.757	Arahy.17	130834956		a	b	b	a	b	b	a	a	b	a	h	b	b	b	a	a	b	b	b	b	a	b	b	b	b	h	a	b	b	a	a	b	h	b	b	b	b	b	a	b	b	b	a
B07	AX-177637346	AX-177637346_B07	38.757	Arahy.17	130807031		a	b	b	a	b	b	a	a	b	a	h	b	b	b	a	a	b	b	b	b	a	b	b	b	b	h	a	b	b	a	a	b	h	b	b	b	b	b	a	b	b	b	a
B07	AX-177638976	AX-177638976_B07	39.092	Arahy.17	131008250		a	b	b	a	b	b	a	a	b	a	h	-	b	b	a	a	b	b	b	b	a	b	b	b	b	h	a	b	b	a	a	b	h	b	b	b	b	b	a	b	b	b	a
B07	AX-177639469	AX-177639469_B07	48.17	Arahy.17	132395448		a	b	b	a	b	b	a	a	a	a	a	b	b	h	a	a	b	h	b	b	a	b	h	b	b	h	b	b	a	b	a	b	h	b	b	b	b	b	a	h	b	b	a
B08	AX-177641452	AX-177641452_B08	0	Arahy.18	8931473		-	-	a	b	-	a	a	h	b	a	a	b	b	a	a	a	a	b	b	b	b	b	b	b	a	b	-	-	b	a	a	a	b	a	a	a	-	a	a	a	b	b	a
B08	AX-177642964	AX-177642964_B08	3.513	Arahy.18	12213433		b	b	h	b	b	a	a	b	b	a	a	b	b	a	a	b	a	a	b	b	b	b	b	b	a	b	b	b	b	a	a	a	b	a	a	a	b	a	a	a	b	b	a
B08	AX-176819905	AX-176819905_B08	3.731	Arahy.18	12233583		b	b	h	b	b	a	a	b	b	a	a	b	b	a	a	b	a	a	b	b	b	b	b	b	a	b	b	b	b	a	a	a	b	a	a	a	b	a	a	a	b	b	a
B08	AX-176815753	AX-176815753_B08	3.731	Arahy.18	12233513		b	b	h	b	b	a	a	b	b	a	a	b	b	a	a	b	a	a	b	b	b	b	b	b	a	b	b	b	b	a	a	a	b	a	-	a	b	a	a	a	b	b	a
B08	AX-177642987	AX-177642987_B08	4.391	Arahy.18	13901620		b	b	h	b	b	a	a	b	b	a	a	b	b	a	a	b	a	a	b	b	b	b	b	b	a	b	b	b	b	a	a	a	b	a	a	a	b	a	a	a	b	b	a
B08	AX-177637148	AX-177637148_B08	9.468	Arahy.18	23694094		b	b	h	b	b	a	b	b	b	a	a	b	b	a	a	b	a	a	b	b	b	b	b	b	a	b	b	b	b	a	a	a	b	a	a	a	b	a	a	a	b	b	a
B08	AX-177642533	AX-177642533_B08	10.338	Arahy.18	37891473		b	b	a	h	b	a	b	b	b	a	a	b	b	a	a	b	a	a	b	b	b	b	b	b	a	b	b	b	b	a	a	a	b	a	a	a	b	a	a	a	b	b	a
B08	AX-176801428	AX-176801428_B08	10.463	Arahy.18	57892757		b	b	a	h	b	a	b	b	b	a	a	b	b	a	a	b	a	a	b	b	b	b	b	b	a	b	b	b	b	a	a	a	b	a	a	a	b	-	a	a	b	b	a
B08	AX-177640594	AX-177640594_B08	10.571	Arahy.18	39065499		b	b	a	h	b	a	b	b	b	a	a	b	b	a	a	b	a	a	b	b	b	b	b	b	a	b	b	b	b	a	a	a	b	a	a	a	b	a	a	a	b	b	a
B08	AX-176809748	AX-176809748_B08	10.68	Arahy.18	68659188		b	b	a	h	b	a	b	b	b	a	-	b	b	a	a	b	a	a	b	b	b	b	b	b	a	b	b	b	b	-	a	a	b	a	a	a	b	-	a	a	b	b	a
B08	AX-176802592	AX-176802592_B08	10.788	Arahy.18	89928027		b	b	a	h	b	a	b	b	b	a	a	b	b	a	a	b	a	a	b	b	b	b	b	b	a	b	b	b	b	a	a	a	b	a	a	a	b	a	a	a	b	b	a
B08	AX-176792251	AX-176792251_B08	10.897	Arahy.18	86807563		b	b	a	h	b	a	b	b	b	a	a	b	b	a	a	b	a	a	b	b	b	b	b	b	a	b	b	b	b	a	a	a	b	a	a	a	b	a	a	a	b	b	a
B08	AX-176794348	AX-176794348_B08	11.005	Arahy.18	38363217		b	b	a	h	b	-	b	b	b	a	a	b	b	a	a	b	a	a	b	b	b	b	b	b	a	b	b	b	b	a	a	a	b	a	a	a	b	a	a	a	b	b	a
B08	AX-147258472	AX-147258472_B08	11.222	Arahy.18	92446914		b	b	a	h	b	a	b	b	b	a	a	b	b	a	a	b	a	a	b	b	b	b	b	b	a	b	b	b	b	a	a	a	b	a	a	a	b	a	a	a	b	b	a
B08	AX-177642927	AX-177642927_B08	11.662	Arahy.18	103451258		b	b	a	h	b	a	b	b	b	a	a	b	b	a	a	b	a	a	b	b	b	b	b	b	a	b	b	b	b	a	a	a	b	a	a	a	b	a	a	a	b	b	a
B08	AX-177643428	AX-177643428_B08	11.881	Arahy.18	106548580		b	b	a	h	b	a	b	b	b	a	a	b	b	a	a	b	a	a	b	b	b	b	b	b	a	b	b	b	b	a	a	a	b	a	a	a	b	a	a	a	b	b	a
B08	AX-147231190	AX-147231190_B08	13.822	Arahy.18	114794740		b	b	a	h	b	a	h	b	b	a	a	b	b	a	a	b	h	a	b	b	b	b	b	b	a	b	b	b	b	a	a	a	b	a	a	a	b	a	a	a	b	b	a
B08	AX-177641627	AX-177641627_B08	14.484	Arahy.18	116061516		b	b	a	h	b	a	h	b	b	a	a	b	b	a	a	b	a	a	b	b	b	b	b	b	a	b	b	b	b	a	a	a	b	a	a	a	b	a	a	a	b	b	a
B08	AX-177643142	AX-177643142_B08	17.036	Arahy.18	121613438		b	b	a	a	b	a	h	b	b	a	a	b	b	a	a	b	h	a	b	b	b	b	b	b	a	b	a	b	b	a	a	a	b	a	a	a	b	a	a	a	b	b	b
B08	AX-177641064	AX-177641064_B08	17.81	Arahy.18	122832134		b	b	h	a	b	a	h	b	b	a	a	b	b	a	a	b	b	a	b	b	b	b	b	b	a	b	a	b	b	a	a	a	b	a	a	a	a	a	a	a	b	b	b
B08	AX-176820769	AX-176820769_B08	18.19	Arahy.18	122465770		b	b	a	a	b	a	h	b	b	a	a	b	b	a	a	b	h	a	b	b	b	b	b	b	a	b	a	b	b	a	a	a	b	a	a	a	a	a	a	a	b	b	b
B08	AX-176796612	AX-176796612_B08	18.689	Arahy.18	122039527		b	b	a	a	b	a	-	b	b	a	a	b	b	a	a	b	-	a	h	b	b	b	b	b	a	b	a	b	b	-	a	a	b	a	a	-	a	a	a	a	b	b	b
B08	AX-177644355	AX-177644355_B08	19.239	Arahy.18	122051811		b	b	a	a	b	a	h	b	b	a	a	b	b	a	a	b	h	a	b	b	b	b	b	b	a	b	a	b	b	a	a	a	b	a	a	a	a	a	a	a	b	b	b
B08	AX-176820349	AX-176820349_B08	19.782	Arahy.18	122491748		b	b	a	a	b	a	h	b	b	a	a	b	b	a	a	b	h	a	b	b	b	b	b	b	a	b	a	b	b	a	a	a	b	a	a	a	a	a	a	a	b	b	b
B08	AX-176822771	AX-176822771_B08	19.801	Arahy.18	122506288		b	b	a	a	b	a	h	b	b	a	a	b	b	a	a	b	h	a	b	b	b	b	b	b	a	b	a	b	b	a	a	a	b	a	a	a	a	a	a	a	b	b	b
B08	AX-177637631	AX-177637631_B08	20.448	Arahy.18	122251910		b	b	a	a	b	a	h	b	b	a	a	b	b	a	a	b	h	a	b	b	b	b	b	b	a	b	a	b	b	a	a	a	b	a	a	a	a	a	a	a	b	b	b
B08	AX-176820563	AX-176820563_B08	20.815	Arahy.18	122478758		b	b	a	a	b	a	h	b	b	a	a	b	b	a	a	b	h	a	b	b	b	b	b	b	a	b	a	b	b	-	a	a	b	a	a	a	a	a	a	a	b	b	b
B08	AX-147221639	AX-147221639_B08	22.715	Arahy.18	123234970		b	b	a	a	b	a	a	b	b	a	a	b	b	a	a	b	a	a	b	b	b	b	b	b	a	b	a	b	b	a	a	a	b	a	a	a	a	a	a	a	b	b	b
B08	AX-147221637	AX-147221637_B08	24.037	Arahy.18	123235977		b	b	a	-	b	a	h	b	b	a	a	b	b	a	a	b	a	a	b	b	b	b	b	b	a	b	a	b	b	a	a	a	b	a	a	a	a	a	a	a	b	b	b
B08	AX-177640588	AX-177640588_B08	24.502	Arahy.18	123076293		b	b	a	a	b	a	h	b	b	a	a	b	b	a	a	b	h	a	b	b	b	b	b	b	a	b	a	b	b	a	a	a	b	a	a	a	a	a	a	a	b	b	b
B08	AX-177643211	AX-177643211_B08	24.72	Arahy.18	123018793		b	b	h	a	b	a	h	b	b	a	a	b	b	a	a	b	h	a	b	b	b	b	b	b	a	b	a	b	b	a	a	a	b	a	a	a	a	a	a	a	b	b	b
B08	AX-176805497	AX-176805497_B08	28.034	Arahy.18	124014201		b	b	h	a	b	a	a	b	b	a	a	b	b	a	a	b	b	a	b	b	b	b	b	b	a	b	a	b	b	a	a	a	b	b	a	a	a	a	a	a	b	b	b
B08	AX-177641001	AX-177641001_B08	56.314	Arahy.18	133463058		a	-	a	b	-	a	a	b	a	a	a	a	b	a	a	a	b	a	b	b	b	b	b	b	b	b	a	b	a	a	a	a	a	a	a	b	b	a	a	h	b	b	h
B08	AX-176820756	AX-176820756_B08	58.692	Arahy.18	133586260		a	a	a	b	a	b	b	a	a	b	a	a	b	a	a	a	b	a	b	b	b	b	b	b	b	b	a	b	a	a	a	a	a	a	a	b	b	a	a	h	b	b	h
B08	AX-177639874	AX-177639874_B08	59.14	Arahy.18	133668804		a	a	a	b	a	b	b	a	a	b	a	a	b	a	a	-	b	a	b	b	b	b	b	b	b	b	a	b	a	a	a	a	a	a	a	b	b	a	a	h	b	b	h
B09	AX-177637314	AX-177637314_B09	0	Arahy.19	27978911		b	b	b	b	b	b	a	a	b	a	h	b	b	a	b	b	a	b	b	a	a	a	a	b	a	b	b	a	b	a	a	b	b	a	b	b	b	b	a	b	b	b	b
B09	AX-176814081	AX-176814081_B09	0.438	Arahy.19	32455325		b	b	b	b	b	b	a	a	b	a	h	b	b	a	b	b	a	b	b	a	a	a	a	b	a	b	b	a	b	a	a	b	b	a	b	b	b	b	a	b	b	b	b
B09	AX-177638854	AX-177638854_B09	0.875	Arahy.19	35847959		b	b	b	b	b	b	a	-	b	a	h	b	b	a	b	b	a	b	b	a	a	a	a	b	a	b	b	a	b	a	a	b	b	a	b	b	b	b	a	b	b	b	b
B09	AX-177644398	AX-177644398_B09	1.093	Arahy.19	33006164		b	b	b	b	b	b	a	a	b	a	h	b	b	a	b	b	a	b	b	a	a	a	a	b	a	b	b	a	b	a	a	b	b	a	b	b	b	b	a	b	b	b	b
B09	AX-177642731	AX-177642731_B09	1.753	Arahy.19	41583703		b	b	b	b	b	b	a	a	b	a	h	b	b	a	b	b	a	b	b	a	a	a	a	b	a	b	b	a	b	a	a	b	b	a	b	b	b	b	b	b	b	b	b
B09	AX-147261011	AX-147261011_B09	2.191	Arahy.19	44345036		b	b	b	b	b	b	a	a	b	a	h	b	b	a	b	b	a	b	b	a	a	a	a	b	a	b	b	a	b	a	a	b	b	a	b	b	b	b	b	b	b	b	b
B09	AX-176819023	AX-176819023_B09	3.305	Arahy.19	88440548		b	b	b	b	b	b	a	a	b	a	h	b	b	a	b	b	a	b	b	a	a	a	a	b	a	b	b	a	b	a	a	b	b	a	b	b	b	b	b	b	b	b	b
B09	AX-176815579	AX-176815579_B09	3.854	Arahy.19	107247581		b	-	b	b	h	b	a	a	b	a	h	b	b	a	-	b	a	b	b	a	a	a	a	b	a	b	b	a	b	a	a	b	b	a	b	b	b	b	b	b	b	b	b
B09	AX-177639671	AX-177639671_B09	4.181	Arahy.19	116289923		b	b	b	b	b	b	a	a	b	a	h	b	b	a	b	b	a	b	b	a	a	a	a	b	a	b	b	a	b	a	a	b	b	a	b	b	b	b	b	b	b	b	b
B09	AX-177639939	AX-177639939_B09	4.509	Arahy.19	123927402		b	b	b	b	b	b	a	a	b	a	h	b	b	a	h	b	a	b	b	a	a	a	a	b	a	b	b	a	b	a	a	b	b	a	b	b	b	b	b	b	b	b	b
B09	AX-177643709	AX-177643709_B09	4.509	Arahy.19	121469101		b	b	b	b	b	b	a	-	b	a	h	b	b	a	h	b	a	b	b	a	a	a	a	b	a	b	b	a	b	a	a	b	b	a	b	b	b	b	b	b	b	b	b
B09	AX-177638745	AX-177638745_B09	4.509	Arahy.19	130595637		b	b	b	b	b	b	a	a	b	a	h	b	b	a	h	b	a	b	b	a	a	a	a	b	a	b	b	a	b	a	a	b	b	a	b	b	b	b	b	b	b	b	b
B09	AX-177639940	AX-177639940_B09	4.617	Arahy.19	138666192		b	b	b	b	b	b	a	a	b	a	h	b	b	a	h	b	a	b	b	a	a	a	a	b	a	b	b	a	b	a	a	b	b	a	b	b	b	b	b	b	b	b	b
B09	AX-177642454	AX-177642454_B09	4.617	Arahy.19	138748173		b	b	b	b	b	b	a	a	b	a	h	b	b	a	h	b	a	b	b	a	a	a	a	b	a	b	b	a	b	a	a	b	b	a	b	b	b	b	b	b	b	b	b
B09	AX-177639970	AX-177639970_B09	5.055	Arahy.19	139738590		b	b	b	b	b	b	a	a	b	a	h	b	b	a	h	b	a	b	b	a	b	a	a	b	a	b	b	a	b	a	a	b	b	a	b	b	b	b	b	b	b	b	b
B09	AX-147261745	AX-147261745_B09	5.493	Arahy.19	141573309		b	b	b	b	b	b	a	a	b	a	h	b	b	a	h	b	a	b	b	a	b	a	a	b	a	b	b	a	b	a	a	b	b	a	b	b	b	b	b	b	b	b	b
B09	AX-176820504	AX-176820504_B09	6.391	Arahy.19	143993429		b	b	b	b	b	b	a	a	b	a	h	b	b	h	h	b	a	b	b	a	b	h	a	b	a	b	h	a	b	a	a	b	b	a	b	b	b	b	b	b	b	b	b
B09	AX-176795130	AX-176795130_B09	33.264	Arahy.19	155528421		b	b	b	b	b	b	a	a	h	a	b	b	a	b	h	h	a	b	b	h	a	a	b	b	a	b	b	a	a	a	a	b	b	a	a	b	b	a	b	a	b	a	b
B09	AX-176807953	AX-176807953_B09	34.382	Arahy.19	155614795		b	b	b	b	b	b	a	a	a	a	b	b	a	b	h	h	a	b	b	h	a	a	b	b	a	b	b	a	a	a	a	b	b	a	a	b	b	a	h	a	b	a	b
B09	AX-147262340	AX-147262340_B09	34.959	Arahy.19	155718581		b	b	b	b	b	b	a	a	a	a	b	b	a	b	h	-	a	b	b	h	a	a	b	b	a	-	b	a	a	a	a	b	b	a	a	b	b	a	h	a	b	a	b
B09	AX-147234331	AX-147234331_B09	35.865	Arahy.19	155827911		b	b	b	b	b	b	a	a	a	a	b	b	a	b	h	-	a	b	b	-	a	a	b	b	a	-	a	a	a	a	a	b	b	a	a	b	b	a	h	a	b	a	b
B09	AX-177642272	AX-177642272_B09	37.082	Arahy.19	156015207		b	b	b	b	b	b	a	a	a	a	b	b	a	h	h	h	a	b	b	h	a	a	b	b	a	h	a	a	a	a	a	b	b	a	a	b	b	a	h	a	-	a	b
B09	AX-177641303	AX-177641303_B09	37.192	Arahy.19	156026650		b	b	b	b	b	b	a	a	a	a	b	b	a	h	h	h	a	b	b	h	a	a	b	b	a	h	a	a	a	a	a	b	b	a	a	b	b	a	h	a	b	a	b
B09	AX-176798303	AX-176798303_B09	56.787	Arahy.19	157712651		b	b	a	b	b	b	a	a	a	a	b	b	a	b	h	h	a	b	b	b	b	h	b	b	a	a	a	b	b	a	a	b	b	a	a	b	b	a	h	a	a	a	b
B10_1	AX-177637520	AX-177637520_B10	0	Arahy.20	135542330		b	a	b	a	b	a	a	a	b	b	a	a	b	a	b	b	b	h	a	h	b	h	b	b	b	b	b	b	b	a	h	a	b	a	b	a	a	b	a	a	b	a	a
B10_1	AX-176821193	AX-176821193_B10	0.476	Arahy.20	134326251		b	a	-	a	b	a	a	a	b	b	a	a	b	a	b	b	b	h	a	h	b	h	b	b	b	b	b	b	b	a	a	a	b	a	b	a	a	b	a	a	b	a	a
B10_1	AX-177639117	AX-177639117_B10	2.616	Arahy.20	127580648		b	a	a	a	b	a	a	b	b	b	a	a	b	a	b	b	b	h	a	b	b	h	b	b	b	b	b	b	b	a	b	a	b	a	b	a	a	b	a	a	b	a	a
B10_1	AX-177637844	AX-177637844_B10	3.846	Arahy.20	122820293		b	a	a	a	b	a	a	b	b	b	a	a	b	a	b	b	b	h	a	a	b	h	b	b	b	b	b	b	b	a	b	a	b	a	b	a	a	b	a	a	b	a	a
B10_1	AX-177643145	AX-177643145_B10	4.064	Arahy.20	122379101		b	a	a	a	b	a	a	b	b	b	a	a	b	a	b	b	b	h	a	a	b	h	b	b	b	b	b	b	b	a	b	a	b	a	b	a	a	b	a	a	b	a	a
B10_1	AX-177640007	AX-177640007_B10	5.294	Arahy.20	108469478		b	a	a	a	b	a	a	b	b	b	a	a	b	a	b	b	b	b	a	a	b	h	b	b	b	b	b	b	b	a	b	a	b	a	b	a	a	b	a	a	b	a	a
B10_1	AX-177644266	AX-177644266_B10	5.294	Arahy.20	109531129		b	a	a	a	b	a	a	b	b	b	a	a	b	a	b	b	b	b	a	a	b	h	b	b	b	b	b	b	b	a	b	a	b	a	b	a	a	b	a	a	b	a	a
B10_1	AX-176803460	AX-176803460_B10	6.18	Arahy.20	72482941		a	a	a	a	b	a	a	b	b	b	a	a	b	a	b	b	b	b	a	a	b	h	b	b	b	b	b	b	b	a	b	a	b	a	b	a	a	b	a	a	b	a	a
B10_1	AX-177643429	AX-177643429_B10	6.397	Arahy.20	72303786		a	a	a	a	b	a	a	b	b	b	a	a	b	a	b	b	b	b	a	a	b	h	b	b	b	b	b	b	b	a	b	a	b	a	b	a	a	b	a	a	b	a	a
B10_1	AX-177642191	AX-177642191_B10	7.228	Arahy.20	43051365		a	a	a	a	b	a	a	b	-	b	a	a	b	a	b	b	b	b	a	a	b	-	b	b	b	-	b	b	b	a	b	a	b	a	b	a	a	b	a	a	b	a	a
B10_1	AX-177642058	AX-177642058_B10	7.948	Arahy.20	41280028		a	a	a	a	b	a	a	b	b	b	a	a	b	a	-	b	b	b	a	a	h	h	b	b	b	b	b	b	b	a	-	a	b	a	b	a	a	b	a	a	b	a	a
B10_1	AX-176813842	AX-176813842_B10	8.608	Arahy.20	43277083		a	a	a	-	b	a	a	b	b	b	h	a	b	a	b	b	b	b	a	a	b	h	b	b	b	b	b	b	b	a	b	a	b	a	b	a	a	b	a	a	b	a	a
B10_1	AX-177643658	AX-177643658_B10	9.495	Arahy.20	31269146		a	a	a	a	b	a	a	b	b	b	a	a	b	a	b	b	b	b	a	a	b	h	b	b	b	b	b	b	b	a	b	a	b	a	b	a	a	b	a	a	b	a	a
B10_1	AX-177638327	AX-177638327_B10	11.745	Arahy.20	24609197		a	a	a	-	b	a	a	b	b	b	a	a	b	a	b	b	b	b	h	a	b	h	b	b	b	b	b	b	b	-	b	-	b	a	b	a	a	b	a	a	b	a	h
B10_1	AX-177643701	AX-177643701_B10	13.969	Arahy.20	16290706		a	a	a	a	b	a	a	b	b	b	a	a	b	a	b	b	b	b	a	a	b	h	b	b	b	b	b	b	b	a	b	a	b	a	b	a	a	b	a	a	b	a	a
B10_1	AX-147263409	AX-147263409_B10	17.186	Arahy.20	10763023		a	a	a	a	b	h	a	b	b	b	a	a	b	a	b	b	b	b	a	a	b	h	b	b	b	b	b	b	b	a	b	a	b	a	a	a	a	b	a	a	b	a	a
B10_1	AX-177643219	AX-177643219_B10	18.277	Arahy.20	8677919		a	a	a	a	b	h	a	b	a	b	a	a	b	a	b	b	b	b	a	a	b	h	b	b	b	b	b	b	b	a	b	a	b	a	a	a	a	b	a	a	b	a	a
B10_1	AX-147212012	AX-147212012_B10	19.935	Arahy.20	7645211		a	a	a	a	b	a	a	b	a	b	b	a	b	a	b	b	b	b	a	a	b	h	b	b	b	b	b	b	b	a	b	a	b	a	a	a	a	b	a	a	b	a	a
B10_2	AX-177639766	AX-177639766_B10	0	Arahy.20	27604		b	b	b	a	a	b	b	b	a	b	h	a	b	b	a	b	b	b	a	a	b	b	a	a	a	a	a	b	a	a	b	b	b	b	a	a	a	a	a	a	b	a	a
B10_2	AX-177643866	AX-177643866_B10	0.226	Arahy.20	278229		b	b	b	a	a	b	b	b	a	b	h	a	b	b	a	b	b	b	a	a	b	b	a	a	a	a	a	b	a	a	b	b	b	b	a	a	a	a	a	a	b	a	a
B10_2	AX-147262801	AX-147262801_B10	2.658	Arahy.20	384096		b	b	b	a	a	b	b	b	a	b	h	a	b	b	a	b	b	b	a	a	b	b	a	a	a	a	a	b	a	a	b	b	b	b	a	a	a	a	a	a	b	a	a
B10_2	AX-177644439	AX-177644439_B10	5.342	Arahy.20	589439		b	b	b	a	a	b	b	b	a	b	h	a	b	b	a	b	b	b	a	a	b	b	a	a	a	a	a	b	a	a	b	a	b	b	a	a	a	a	a	a	b	a	a
B10_2	AX-147262821	AX-147262821_B10	6.809	Arahy.20	686004		b	b	b	a	a	b	b	b	a	b	h	a	b	b	a	b	b	b	a	a	b	b	a	a	a	a	a	b	a	a	b	a	b	a	a	a	a	a	a	a	b	h	a
B10_2	AX-147262838	AX-147262838_B10	9.384	Arahy.20	881948		b	b	b	h	a	b	b	b	a	b	a	a	b	b	a	b	b	b	a	a	b	b	b	a	b	a	a	b	a	a	b	a	b	a	a	a	a	a	a	a	b	h	a
[truncated: 192 more columns]

## Sheet: Table S2
Phenotypic trait values from the three replicates by year for the QTL analysis.
HH - Hanoch x Harari RILs
Trait name	Measurement unit	Abbreviation	HH-1	HH-2	HH-3	HH-4	HH-5	HH-6	HH-7	HH-8	HH-9	HH-10	HH-11	HH-12	HH-13	HH-14	HH-15	HH-16	HH-17	HH-19	HH-20	HH-21	HH-22	HH-23	HH-24	HH-25	HH-26	HH-27	HH-29	HH-31	HH-32	HH-34	HH-35	HH-36	HH-39	HH-40	HH-41	HH-42	HH-43	HH-44	HH-45	HH-47	HH-48	HH-49	HH-51	HH-52	HH-53	HH-54	HH-55
Maturity index	%	MI_18	47.4213	31.7824	28.7001	41.3593	39.6471	30.3883	54.5115	47.2121	38.7909	48.0631	45.5772	44.2457	27.555	40.9996	25.9177	49.8764	22.3275	52.0079	30.8207	38.5842	50.386	40.8023	39.3017	68.9297	26.927	43.4154	43.182	30.5048	39.6165	45.8867	27.8664	42.8569	37.5911	46.8238	50.0255	38.3736	26.616	36.7691	38.6155	35.9995	43.5823	42.3741	32.1778	52.8804	47.1885	22.577	45.6633
Maturity index	%	MI_19	46.1937	45.8831	58.1624	78.2564	57.5909	45.8908	58.8093	52.9002	64.626	48.9966	70.994	76.0628	49.6327	48.9189	61.3637	70.4349	40.919	57.9351	62.5	53.0784	64.5676	57.6303	49.2745	58.0229	55.1211	62.1627	62.949	54.1934	63.6541	72.9551	37.8329	59.2148	51.8322	62.716	57.1263	55.8602	43.7434	45.5042	49.6854	49.519	70.0992	62.592	50.5052	69.6675	53.1301	34.9987	67.7605
Pod yield	g	PY_18	2891.36	1719.5	2302.17	3005.67	2785.17	2177.17	2384.56	2216.5	1814.17	2090.83	2136.17	2231.17	2444.17	2368.86	2299.78	2697.36	1706.17	1760.17	2132.83	2160.83	2371.86	2667.17	1724.56	1745.67	2469.67	1701.67	2507.36	2547.17	2505.83	1558.83	1797.36	2335.83	2264.36	2293.17	2195.83	3055.47	1357.36	2521.5	1859.5	2532.17	2526.17	1816.56	2185.83	2073.17	2109.17	2073.83	3319.78
Pod yield	g	PY_19	2400	2503.33	2230	2670	1940	2560	2923.33	2496.67	2856.67	3080	2606.67	2176.67	2623.33	3020	2926.67	2853.33	2500	3143.33	2310	2706.67	2916.67	3056.67	2806.67	2816.67	2510	2630	2990	2170	2520	3656.67	2293.33	3216.67	2770	3006.67	2346.67	2583.33	2413.33	2246.67	2320	2403.33	2836.67	2596.67	2316.67	2020	2710	1980	2390
Harvest index	g.g-1	HI_18	0.766683	0.558585	0.466989	0.584139	0.582431	0.362238	0.685662	0.489381	0.505115	0.533366	0.733273	0.783283	0.41002	0.698769	0.386045	0.592724	0.37726	0.469791	0.471033	0.505245	0.536937	0.545581	0.477612	0.545846	0.951969	0.468654	0.57745	0.495213	0.705788	0.531244	0.269887	0.646324	0.522737	0.482744	0.600149	0.739993	0.329107	0.695306	0.545163	0.579278	0.732912	0.57182	0.352356	0.689092	0.528121	0.56333	0.897842
Harvest index	g.g-1	HI_19	0.584208	0.65903	0.558039	0.776895	0.533198	0.542793	0.801952	0.549133	0.763804	0.749096	0.792043	0.835681	0.649136	0.747499	0.657724	0.80921	0.517088	0.788434	0.70106	0.665636	0.760353	0.767753	0.753336	0.685337	0.627814	0.743888	0.719497	0.592177	0.78276	0.681182	0.48469	0.885411	0.544562	0.758389	0.673537	0.755887	0.525338	0.679699	0.718247	0.580461	0.720833	0.751772	0.517986	0.762342	0.773431	0.487709	0.674261
50 Pod weight	g	50PW_18	222.323	211.78	203.323	196.494	198.78	213.28	184.447	181.28	202.994	207.447	208.78	206.447	212.28	209.614	181.523	209.947	213.614	205.494	218.614	205.28	205.323	204.447	205.523	191.114	193.447	219.573	193.947	210.114	224.78	171.614	201.447	217.78	191.323	191.114	230.78	206.023	218.614	199.494	213.947	198.823	176.114	204.447	195.114	193.447	210.947	208.614	207.773
50 Pod weight	g	50PW_19	218.5	177	175.5	174	171	166	176.667	150	171.333	179.333	185.333	184.667	183	174.333	177	188.333	150.667	160.667	150	187.667	179.667	190.333	168	146.667	167.333	180.333	166.667	184.667	185.667	167	182	186.667	179.667	162.333	194	195.333	190.667	177.333	168.333	185.667	154.333	167.667	179	169.333	193.667	187	189.333
50 seed weight	g	50SW_18	82.3344	78.6565	77.8344	77.5599	78.3232	79.3232	73.6565	67.3232	88.5599	81.3232	78.3232	80.0599	77.9898	81.9898	76.0752	83.9898	78.9898	74.5599	82.6565	83.9898	78.3344	80.3232	77.5752	74.3232	70.9898	83.3344	75.3232	77.9898	84.9898	70.9898	74.3232	83.9898	74.3344	76.3232	87.9898	83.5752	83.6565	79.0599	79.6565	77.3344	70.3232	78.9898	76.9898	76.9898	79.6565	75.6565	85.5752
50 seed weight	g	50SW_19	75.2744	70.6078	69.5244	67.4689	67.08	69.5244	65.9133	59.0244	66.7189	69.2467	69.1078	73.8856	71.0522	66.9967	69.4411	69.1633	64.6911	63.3022	69.6356	77.4411	65.9411	68.0689	67.6356	62.83	69.83	69.0244	67.7744	66.83	67.1078	70.8022	66.1356	70.2467	69.1356	62.9967	70.6911	72.9411	73.5244	68.3022	63.6078	68.2467	62.5244	69.1356	67.9967	69.1633	69.8856	63.6911	74.4133
Shelling percentage	%	SP_18	68.0717	66.8765	70.0608	71.401	70.9108	74.0706	72.4161	70.7102	68.2992	71.6505	69.1198	71.265	67.5147	71.792	74.9729	73.7809	68.0826	71.6838	67.0684	70.4818	70.3574	73.052	70.1426	69.4713	70.38	71.3	72.6654	69.4123	69.1989	72.3189	70.4801	72.1256	70.7626	71.6987	67.135	72.1317	69.2955	72.5933	68.0686	72.0633	75.2359	72.5371	70.9975	73.5778	68.9784	65.9611	74.1639
Shelling percentage	%	SP_19	66.934	73.9567	74.2352	75.375	73.8272	73.8728	73.0751	72.1609	72.2433	73.4011	74.0533	75.1315	76.4185	72.0253	73.5917	73.2334	74.3516	71.7418	74.0953	76.4864	74.7239	70.142	72.482	72.6187	74.8069	72.4359	73.7145	70.368	71.7831	73.3625	72.5849	73.0501	72.3794	70.1784	66.9892	72.2769	71.0691	76.9593	76.1905	71.2094	74.2118	74.0445	72.3605	75.5731	70.9032	73.551	73.7756
Branching habit		BH_18/19	Spreading	Spreading	Bunch	Spreading	Spreading	Spreading	Bunch	Bunch	Bunch	Bunch	Bunch	Spreading	Bunch	Bunch	Spreading	Bunch	Bunch	Bunch	Bunch	Spreading	Spreading	Bunch	Bunch	Spreading	Spreading	Bunch	Spreading	Bunch	Spreading	Bunch	Bunch	Bunch	Spreading	Bunch	Bunch	Bunch	Bunch	Spreading	Bunch	Bunch	Spreading	Bunch	Bunch	Bunch	Bunch	Bunch	Spreading
[truncated: 188 more columns]
